# 1 Combining genotypes and T cell 2 receptor distributions to infer 3 genetic loci determining V(D)J 4 recombination probabilities

5 **Magdalena L Russell**<sup>1,2</sup>, **Aisha Souquette**<sup>3,4</sup>, **David M Levine**<sup>5</sup>, **E Kaitlynn Allen**<sup>3</sup>,  
6 **Guillermina Kuan**<sup>6,7</sup>, **Noah Simon**<sup>5</sup>, **Angel Balmaseda**<sup>6,7</sup>, **Aubree Gordon**<sup>8</sup>, **Paul G**  
7 **Thomas**<sup>3</sup>, **Frederick A Matsen IV**<sup>1†\*</sup>, **Philip Bradley**<sup>1,9†\*</sup>

\*For correspondence:

[matsen@fredhutch.org](mailto:matsen@fredhutch.org) (FAMIV);  
[pbradley@fredhutch.org](mailto:pbradley@fredhutch.org) (PB)

†Co-senior authors

8 <sup>1</sup>Computational Biology Program, Fred Hutchinson Cancer Research Center, Seattle,  
9 United States; <sup>2</sup>Molecular and Cellular Biology Program, University of Washington,  
10 Seattle, United States; <sup>3</sup>Department of Immunology, St. Jude Children's Research Hospital,  
11 Memphis, United States; <sup>4</sup>Department of Microbiology, Immunology, and Biochemistry,  
12 University of Tennessee Health Science Center, Memphis, United States; <sup>5</sup>Department of  
13 Biostatistics, University of Washington, Seattle, United States; <sup>6</sup>Centro Nacional de  
14 Diagnóstico y Referencia, Ministry of Health, Managua, Nicaragua; <sup>7</sup>Sustainable Sciences  
15 Institute, Managua, Nicaragua; <sup>8</sup>Department of Epidemiology, University of Michigan, Ann  
16 Arbor, United States; <sup>9</sup>Institute for Protein Design, Department of Biochemistry,  
17 University of Washington, Seattle, United States

---

18

19 **Abstract** Every T cell receptor (TCR) repertoire is shaped by a complex probabilistic tangle of  
20 genetically determined biases and immune exposures. T cells combine a random V(D)J  
21 recombination process with a selection process to generate highly diverse and functional TCRs. The  
22 extent to which an individual's genetic background is associated with their resulting TCR repertoire  
23 diversity has yet to be fully explored. Using a previously published repertoire sequencing dataset  
24 paired with high-resolution genome-wide genotyping from a large human cohort, we infer specific  
25 genetic loci associated with V(D)J recombination probabilities using genome-wide association  
26 inference. We show that V(D)J gene usage profiles are associated with variation in the *TCRB* locus  
27 and, specifically for the functional TCR repertoire, variation in the major histocompatibility complex

28 locus. Further, we identify specific variations in the genes encoding the Artemis protein and the TdT  
29 protein to be associated with biasing junctional nucleotide deletion and N-insertion, respectively.  
30 These results refine our understanding of genetically-determined TCR repertoire biases by  
31 confirming and extending previous studies on the genetic determinants of V(D)J gene usage and  
32 providing the first examples of *trans* genetic variants which are associated with modifying  
33 junctional diversity. Together, these insights lay the groundwork for further explorations into how  
34 immune responses vary between individuals.

35

---

## 36 Introduction

37 Receptor proteins on the surfaces of T cells are an essential component of the cell-mediated  
38 adaptive immune response in humans. Cells throughout the body regularly present protein  
39 fragments, known as antigens, on cell-surface molecules called major histocompatibility complex  
40 (MHC). Each T cell expresses a randomly-generated T cell receptor (TCR) which can bind the MHC-  
41 bound peptide and, if necessary, initiate an immune response. As part of this immune response, a  
42 T cell will proliferate and subsequent clones of that T cell will inherit the same antigen-specific TCR.  
43 Over time, the collection of all TCRs in an individual (the TCR repertoire) will dynamically summarize  
44 their previous immune exposures (*Woodsworth et al., 2013*).

45 To appropriately defend against a wide array of foreign pathogens, each individual has a  
46 highly diverse TCR repertoire. To generate diverse and functional TCRs, T cells combine a random  
47 generation process called V(D)J recombination with a selection process for proper expression and  
48 MHC recognition. Each TCR is composed of an  $\alpha$  and a  $\beta$  protein chain which are both generated  
49 through V(D)J recombination. In the  $\beta$  chain, the recombination process proceeds by randomly  
50 choosing from a pool of V-gene, D-gene, and J-gene segments of the germline T cell receptor beta  
51 (*TCRB*) locus over a series of steps. First, the intervening chromosomal DNA between a randomly  
52 chosen D- and J-gene is removed to form a hairpin loop at the end of each gene (*Gellert, 1994*;  
53 *Fugmann et al., 2000; Schatz and Swanson, 2011*). Next, these hairpin loops are nicked open, often  
54 asymmetrically, by the Artemis-DNA-PKcs protein complex to create overhangs at the ends of  
55 each gene (*Weigert et al., 1978; Moshous et al., 2001; Ma et al., 2002; Lu et al., 2007; Zhao et al.,*  
56 *2020*). Depending on the location of the nick, the single-stranded overhang can contain short  
57 inverted repeats of gene terminal sequence known as P-nucleotides (*Nadel and Feeney, 1995*;  
58 *Gauss and Lieber, 1996; Nadel and Feeney, 1997; Jackson et al., 2004*). From here, nucleotides  
59 may be deleted from the gene ends through an incompletely-understood mechanism suggested  
60 to involve Artemis (*Feeney et al., 1994; Nadel and Feeney, 1995, 1997; Jackson et al., 2004; Gu*  
61 *et al., 2010; Zhao et al., 2020*). This nucleotide trimming can remove traces of P-nucleotides (*Gauss*  
62 *and Lieber, 1996; Srivastava and Robins, 2012*). Next, non-templated nucleotides, known as N-

63 insertions, can be added between the gene segments by the enzyme terminal deoxynucleotidyl  
64 transferase (TdT) (*Kallenbach et al., 1992; Gilfillan et al., 1993; Komori et al., 1993*). Once the  
65 nucleotide addition and deletion steps are completed, the gene segments are ligated together. The  
66 process is then repeated between this D-J junction and a random V-gene segment to generate a  
67 complete TCR $\beta$  protein chain. After the  $\beta$  chain has been generated, a similar  $\alpha$  chain recombination  
68 proceeds, although without a D-gene, to complete the TCR. Following the generation process, each  
69 completed TCR undergoes a selection process in the thymus to limit autoreactivity and ensure  
70 its ability to correctly bind peptide antigens presented on a specific MHC molecule (*Goldrath and*  
71 *Bevan, 1999; Thomas and Crawford, 2019*).

72 TCR repertoires vary between individuals and are a complicated tangle of genetically determined  
73 biases and immune exposures. Disentangling these factors is essential for understanding how our  
74 diverse repertoires support a powerful immune response. Previous efforts to unravel the genetic  
75 and environmental determinants governing TCR repertoire diversity have been highly impactful  
76 despite lacking high-throughput TCR repertoire sequencing data (*Sharon et al., 2016; Gao et al.,*  
77 *2019*) and/or high-resolution genotype data (*Rubelt et al., 2016; Emerson et al., 2017; Gao et al.,*  
78 *2019; Krishna et al., 2020*). For example, it has been shown that variation in the MHC locus biases  
79 TCR V(D)J gene usage (*Sharon et al., 2016; Gao et al., 2019*) and has been associated with clusters  
80 of shared receptors in response to Epstein-Barr virus epitope (*DeWitt et al., 2018*). Other studies  
81 have reported biases in V(D)J gene usage (*Zvyagin et al., 2014; Qi et al., 2016; Rubelt et al., 2016;*  
82 *Pogorelyy et al., 2018; Tanno et al., 2020; Fischer et al., 2021*), N-insertion lengths (*Rubelt et al.,*  
83 *2016*), and repertoire similarity in response to acute infection (*Qi et al., 2016; Pogorelyy et al.,*  
84 *2018*) for monozygotic twins. While this work clearly illustrates that genetic similarity implies TCR  
85 repertoire similarity, the extent to which specific variations are associated with V(D)J recombination  
86 probabilities has not been fully explored.

87 In this paper, we directly address the question of how an individual's genetic background  
88 influences their V(D)J recombination probabilities using large human discovery and validation  
89 cohorts for which both TCR immunosequencing data (*Emerson et al., 2017; DeWitt et al., 2018*) and  
90 genotyping data (*Martin et al., 2020*) are available. With the goal of identifying statistically significant  
91 associations between single nucleotide polymorphisms (SNPs) and TCR repertoire features of  
92 interest using these novel, paired datasets, we treat analysis as a genome-wide association (GWAS)  
93 inference with many outcomes. Our results suggest that MHC and *TCRB* loci variations have an  
94 important role in determining the V(D)J gene usage profiles of each individual's repertoire. At the  
95 junctions, we demonstrate that variations in the genes encoding the Artemis protein and the TdT  
96 protein are associated with biasing V- and J-gene nucleotide deletion and V-D and D-J-junction  
97 N-insertion, respectively.

## 98 Results

### 99 Discovery cohort data description

100 We worked with paired SNP array and TCR $\beta$ -immunosequencing data representing 398 individuals  
101 and over 35 million SNPs and/or indels. TCR sequences can be separated into those that code for a  
102 complete, full-length peptide sequence (which we will call “productive” rearrangements) and “non-  
103 productive” rearrangements that do not. Non-productive sequences can arise during TCR generation  
104 steps if the V- and J-genes are shifted into different reading frames or a premature stop codon is  
105 introduced in the junction region. A non-productive rearrangement can be sequenced as part of  
106 the repertoire when a recombination event on one of a T cell's two chromosomes fails to create  
107 a functional receptor, followed by a successful recombination event on the other chromosome.  
108 Because these non-productive sequences do not generate proteins that participate in the T cell  
109 selection process within the thymus, they should not be subject to functional selection (*Robins*  
110 *et al., 2010*). As such, their recombination statistics should reflect only the V(D)J recombination  
111 generation process which occurs before the stage of thymic selection.

112 In the data cohort of 398 individuals, an average of 235,054 unique TCR $\beta$ -chain nucleotide  
113 sequences were sequenced per individual. Within each individual repertoire, roughly 18% of  
114 sequences were classified as “non-productive.” Thus, we can analyze the productive and non-  
115 productive sequences separately to distinguish between TCR generation and selection effects within  
116 each TCR repertoire. Specifically, we inferred the associations between genome-wide variation and  
117 V(D)J gene usage of each V-, D-, and J-gene, the extent of TCR nucleotide trimming, the number of  
118 TCR N-insertions, and the fraction of non-gene-trimmed TCRs containing P-nucleotides for both  
119 productive and non-productive sequences (*Table 1*).

### 120 *TCRB* and MHC locus variation is associated with V-, D-, and J-gene usage frequency

121 To quantify the effect of SNPs on the expression of various V-, D-, and J-genes during V(D)J recombina-  
122 tion, we designed a fixed effects model to assess the relationship between SNP genotype and  
123 gene frequency across all individuals. We fit this “simple model” for each different V-, D-, and J-gene  
124 in our paired dataset.

125 Because of the potential for population-substructure-related effects to inflate associations  
126 between each SNP and gene usage frequency, we incorporated ancestry-informative principal  
127 components (*Conomos et al., 2015*) based on the SNP genotypes for a subset of representative  
128 subjects as covariates in each model (see Methods for details). Diagnostic statistics show that this  
129 bias correction is sufficient (*Figure 1–source data 2*).

130 With these methods, we consider the significance of associations at a Bonferroni-corrected  
131 whole-genome P-value significance threshold of  $4.72 \times 10^{-11}$  (see Methods). Using this conservative  
132 threshold, we identified 9,957 significant associations between the frequency of various V-, D-,



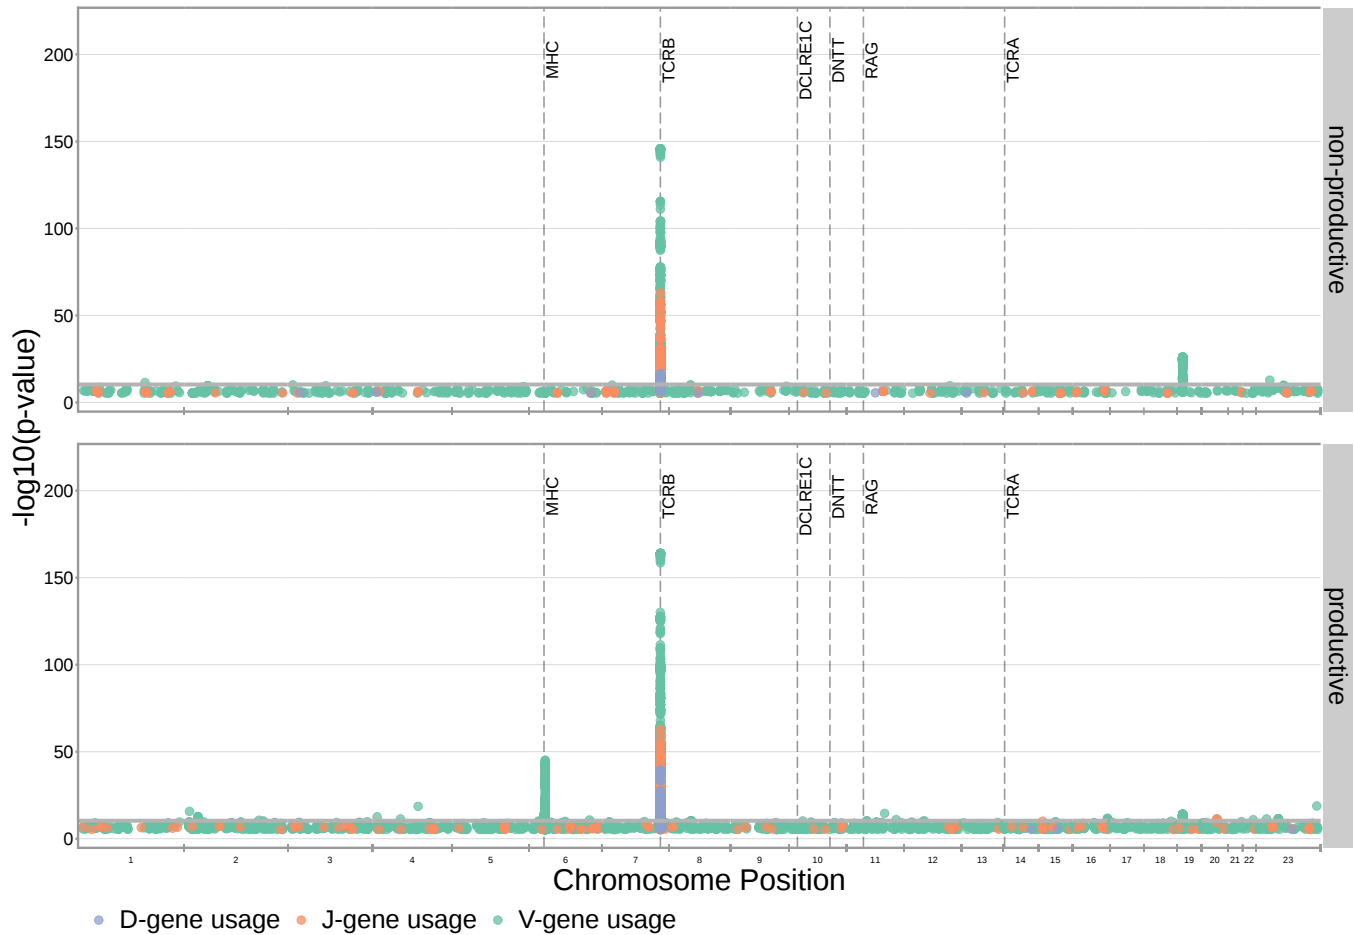

**Figure 1.** Many strong associations are present between V-, D-, and J-gene usage frequency and various SNPs genome-wide for both productive and non-productive TCRs. The most significant SNP associations for the frequency of each of the 66 V-genes, 2 D-genes, and 14 J-genes are located within the *TCRB* and *MHC* loci. Associations are colored by gene-type instead of by gene identity for simplicity. Only SNP associations whose  $P < 5 \times 10^{-6}$  are shown here. The gray horizontal line corresponds to a Bonferroni-corrected P-value significance threshold of  $4.72 \times 10^{-11}$ .

**Figure 1-source data 1.** There are 9,957 significant associations between the frequency of various V-, D-, and J-genes and the genotype of SNPs genome-wide. The model type and Bonferroni-corrected P-value significance threshold used to identify these significant associations are described in [Table 1](#).

**Figure 1-source data 2.** Genomic inflation factor values are less than 1.03 for all paired gene-frequency, productivity GWAS analyses. This suggests that we have properly controlled for population-substructure-related biases in all of the gene usage analyses. Genomic inflation factor values were calculated as described in Methods.

**Table 1.** We inferred the associations between genome-wide variation and many different TCR repertoire features for productive and non-productive TCR sequences, separately. For each TCR repertoire feature, we considered the significance of associations using a Bonferroni-corrected threshold established to correct for each TCR feature subtype, the two TCR productivity types, and the total number of SNPs tested (described in detail in Methods).

| Repertoire feature (significance threshold)                        | Model type       | Feature subtype        | Productivity   | Significant association |
|--------------------------------------------------------------------|------------------|------------------------|----------------|-------------------------|
| <b>V(D)J gene usage</b><br>( $4.72 \times 10^{-11}$ )              | simple           | Each of 66 V-genes     | Productive     | Yes                     |
|                                                                    |                  |                        | Non-productive | Yes                     |
|                                                                    |                  | Each of 2 D-genes      | Productive     | Yes                     |
|                                                                    |                  |                        | Non-productive | Yes                     |
|                                                                    |                  | Each of 14 J-genes     | Productive     | Yes                     |
|                                                                    |                  |                        | Non-productive | Yes                     |
| <b>Amount of nucleotide trimming</b><br>( $9.68 \times 10^{-10}$ ) | gene-conditioned | V-gene trimming        | Productive     | Yes                     |
|                                                                    |                  |                        | Non-productive | Yes                     |
|                                                                    |                  | 5' end D-gene trimming | Productive     | No                      |
|                                                                    |                  |                        | Non-productive | No                      |
|                                                                    |                  | 3' end D-gene trimming | Productive     | No                      |
|                                                                    |                  |                        | Non-productive | No                      |
|                                                                    |                  | J-gene trimming        | Productive     | Yes                     |
|                                                                    |                  |                        | Non-productive | Yes                     |
| <b>Number of N-insertions</b><br>( $1.94 \times 10^{-9}$ )         | simple           | V-D-gene N-insertions  | Productive     | No                      |
|                                                                    |                  |                        | Non-productive | Yes                     |
|                                                                    |                  | D-J-gene N-insertions  | Productive     | No                      |
|                                                                    |                  |                        | Non-productive | Yes                     |

133 and J-genes and the genotype of SNPs genome-wide (**Figure 1** and **Figure 1-source data 1**). Of  
134 these significant associations, 7,678 were located within the *TCRB* locus for both productive and  
135 non-productive TCRs. The *TCRB* gene locus encodes the variable V-, D-, and J-gene segments which  
136 are recombined during V(D)J recombination. In our dataset, there are 66 V-genes, 2 D-genes,  
137 and 14 J-genes uniquely expressed. As we would expect, we find that the expression of many of  
138 these genes is associated with variation in the *TCRB* locus (**Figure 2**). Variation in the *TCRB* locus  
139 is most significantly associated with expression of the gene *TRBV28* within both productive and  
140 non-productive TCR $\beta$  chains.

141 Beyond the *TCRB* locus, we also identified 1,242 significant SNP associations within the major  
142 histocompatibility complex (MHC) locus. MHC proteins act by presenting self and foreign peptides  
143 to TCRs for inspection. Because of this important role in the functionality of T cells, the TCR-MHC  
144 interaction is important for thymic selection. We observe the expression of 12.1% of V-genes for  
145 productive TCRs to be associated with variation in the MHC locus. This associated MHC locus  
146 variation is located within sequences which code for canonical, peptide-presenting MHC proteins.  
147 For example, the eight most significantly associated SNPs were located within the *HLA-DRB1* gene  
148 within the MHC locus. These top SNPs were all associated with the expression of the gene *TRBV10-3*  
149 within productive TCRs. As expected, the expression of V-genes for non-productive TCRs is not  
150 associated with variation in the MHC locus. Likewise, the expression of D- and J-genes for both  
151 productive and non-productive TCRs is not associated with variation in the MHC locus. These results  
152 refine and extend associations found in previous work (*Sharon et al., 2016; Gao et al., 2019*).

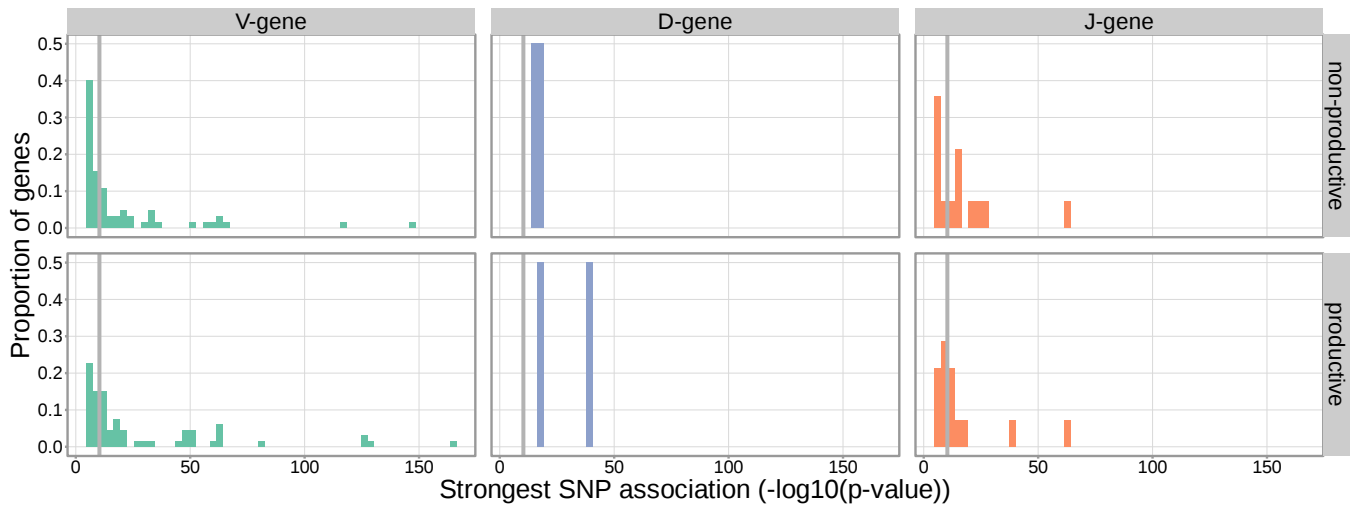

**Figure 2.** Gene-usage frequency of many V-gene, D-gene, and J-gene segments is significantly associated with variation in the *TCRB* locus. The P-value of the strongest *TCRB* SNP, gene-usage association for each different V-gene, D-gene, and J-gene segment is given on the X-axis. The proportion of gene segments within each gene type is given on the Y-axis. The gray vertical lines correspond to a whole-genome-level Bonferroni-corrected P-value significance threshold of  $4.72 \times 10^{-11}$ .

**Figure 2-source data 1.** Top *TCRB* SNP, gene-usage association P-value for each different V-gene, D-gene, and J-gene.

153 We observed just one other long-range association region, in addition to the MHC locus, located  
154 in proximity to the *ZNF443* and *ZNF709* loci on chromosome 19. Both of these zinc finger proteins  
155 contain KRAB-domains and, thus, likely act as transcriptional repressors (*Witzgall et al., 1994*). In  
156 this region, we observe 1,004 significant SNP associations for the expression of the V-genes *TRBV24-1*  
157 and *TRBV24/OR9-2*. Of these 1,004 SNP associations, 604 were associations for V-gene expression in  
158 non-productive TCRs and 400 were associations for V-gene expression in productive TCRs. Because  
159 these associations are strongest for non-productive TCRs, this chromosome 19 variation likely  
160 influences gene usage during TCR generation steps, as opposed to selection. Variation in proximity  
161 to the *ZNF443* and *ZNF709* loci may alter the resulting zinc finger proteins and lead to differential  
162 transcriptional repression of a site near *TRBV24*. Because the transcription of unrearranged gene  
163 segments influences their recombination potential (*Oltz, 2001*), this difference in repression could  
164 subsequently change the usage frequency of the *TRBV24* gene.

### 165 ***DCLRE1C* locus variation is associated with the extent of V-, D-, and J-gene trimming**

166 We hypothesized that SNPs across the genome, particularly those within V(D)J-recombination-  
167 associated genes, may influence the extent of TCR nucleotide trimming at V(D)J *TCRB* gene junctions.  
168 It has been previously observed that the extent of trimming varies by V(D)J *TCRB* gene choice  
169 (*Figure 3-Figure Supplement 4*) (*Nadel and Feeney, 1995, 1997; Jackson et al., 2004; Murugan*  
170 *et al., 2012*). In other words, two different V-genes (*TRBV19* and *TRBV20-1*, for example) will on  
171 average be trimmed to different extents due, in part, to differences in their terminal nucleotide  
172 sequences (and the same is true for D- and J-genes). Thus, to quantify the effect of SNPs on  
173 the extent of V-, D-, and J-gene trimming during V(D)J recombination, without confounding the

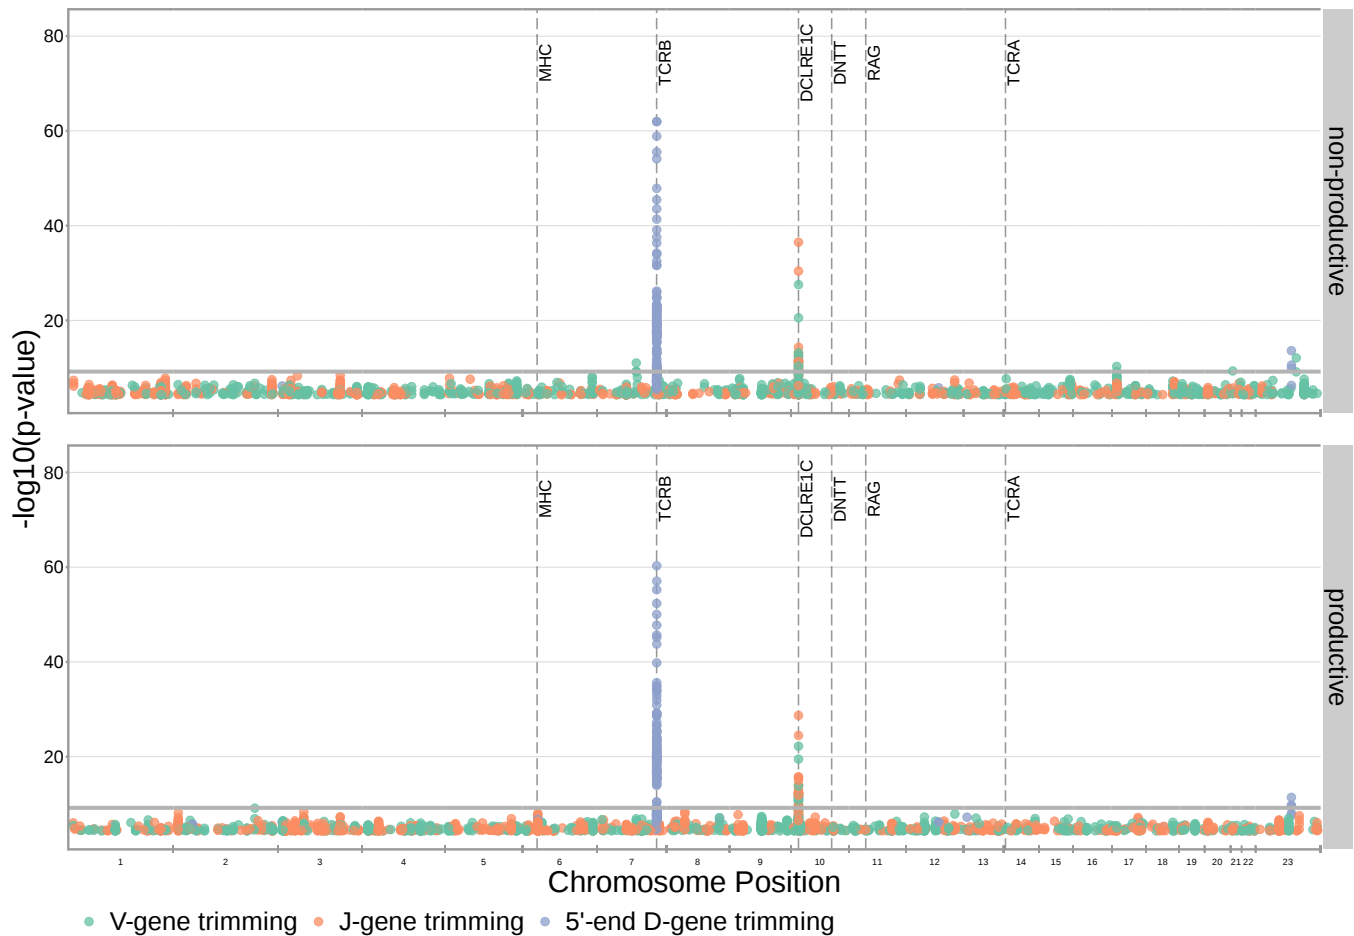

**Figure 3.** SNP associations for all four trimming types reveal the most significant associations to be located within the *TCRB* and *DCLRE1C* loci for 5' D-gene trimming and V-gene trimming, respectively, when conditioning out effects mediated by gene choice when calculating the strength of association. Only SNP associations whose  $P < 5 \times 10^{-5}$  are shown here. The gray horizontal line corresponds to a Bonferroni-corrected P-value significance threshold of  $9.68 \times 10^{-10}$ .

**Figure 3-source data 1.** There are 317 significant SNP associations with the extent of nucleotide trimming for various trimming types. The model type and Bonferroni-corrected P-value significance threshold used to identify these significant associations are described in [Table 1](#).

**Figure 3-source data 2.** Genomic inflation factor values are less than 1.03 for all paired nucleotide trimming, productivity GWAS analyses. This suggests that we have properly controlled for population-substructure-related biases in all of the nucleotide trimming analyses. Genomic inflation factor values were calculated as described in Methods.

**Figure 3-Figure supplement 1.** The SNP genotype for the SNP most significantly associated with 5' end D-gene trimming within the *TCRB* locus is also associated with *TRBD2* allele genotype.

**Figure 3-Figure supplement 2.** Significant associations are no longer observed between 5' end D-gene trimming and variation in the *TCRB* locus after correcting for *TRBD2* allele genotype in our model formulation.

**Figure 3-Figure supplement 3.** Significant associations are also no longer observed between 5' end D-gene trimming and variation in the *TCRB* locus when restricting the analysis to TCRs which contain *TRBJ1* genes (and consequently contain *TRBD1*).

**Figure 3-Figure supplement 4.** The extent of nucleotide deletion varies by the gene allele identity for all gene types.

**Figure 3-Figure supplement 5.** Significant SNP associations are located within the MHC, *TCRB* and *DCLRE1C* loci for all four trimming types when calculating the strength of association without conditioning out effects mediated by gene choice.

**Figure 3-Figure supplement 6.** SNP associations for all fractions of non-gene-trimmed TCRs containing P-nucleotides are not significant within the *DCLRE1C* locus.

**Figure 3-Figure supplement 7.** SNP associations for the number of P-nucleotides are also not significant within the *DCLRE1C* locus.

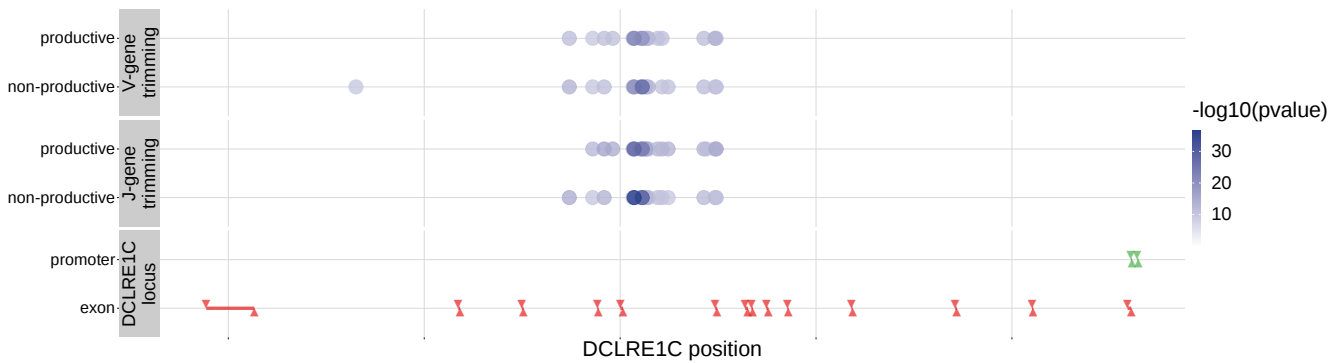

**Figure 4.** Within the *DCLRE1C* locus, 93.8% of these significantly associated SNPs were located within introns. Additionally, many of these significant SNP associations overlapped between trimming types. Downward arrows represent promoter/exon starting positions and upward arrows represent promoter/exon ending positions.

**Figure 4–source data 1.** *DCLRE1C* locus SNP association P-values and locus positions.

**Figure 4–source data 2.** There are two independent SNP signals within the *DCLRE1C* locus for J-gene trimming of non-productive TCRs. A conditional analysis was performed (as described in Methods) to identify these independent signals.

**Figure 4–Figure supplement 1.** The extent of J-gene trimming changes as a function of SNP genotype for the SNP (rs41298872) most significantly associated with J-gene trimming within the *DCLRE1C* locus.

174 extent of trimming with *TCRB* gene choice, we designed a linear fixed effects model to measure the  
175 correlation between each SNP and the number of nucleotide deletions, while conditioning out the  
176 effect mediated by gene choice. We fit this “gene-conditioned model” for each of the four trimming  
177 types (V-gene trimming, 5’ end D-gene trimming, 3’ end D-gene trimming, and J-gene trimming)  
178 on our paired data set. We performed the analysis, as above, incorporating ancestry-informative  
179 principal components in each model (detailed in Methods). Diagnostic statistics show that this  
180 correction for population-substructure-related biases is sufficient (**Figure 3–source data 2**). Here,  
181 we considered the significance of associations at a Bonferroni-corrected whole-genome P-value  
182 significance threshold of  $9.68 \times 10^{-10}$  (see Methods).

183 With these methods, we identified 317 significant SNP associations with the extent of nucleotide  
184 trimming for various trimming types (**Figure 3** and **Figure 4–source data 1**). We found 66 highly  
185 significant associations between V- and J-gene trimming and SNPs within the *DCLRE1C* gene locus  
186 for both productive and non-productive TCRs when considered in the whole-genome context. The  
187 *DCLRE1C* gene encodes the Artemis protein, an endonuclease responsible for cutting the hairpin in-  
188 termediate prior to nucleotide trimming and insertion during V(D)J recombination. Many of the SNPs  
189 responsible for these 66 significant associations within the *DCLRE1C* locus were shared between  
190 trimming and productivity types (**Figure 4**). The most significantly-associated SNP (rs41298872)  
191 within this locus had a P-value of  $3.18 \times 10^{-37}$  for J-gene trimming of non-productive TCRs (**Figure 3–**  
192 **Figure Supplement 1**). This SNP was also significantly-associated with J-gene trimming of productive  
193 ( $P = 1.99 \times 10^{-29}$ ) TCRs and V-gene trimming of productive ( $P = 6.23 \times 10^{-23}$ ) and non-productive  
194 ( $P = 2.81 \times 10^{-21}$ ) TCRs. We performed a conditional analysis to identify potential independent  
195 secondary signals by including this SNP as an additional covariate within the model. This analysis  
196 revealed a second, independent SNP signal (rs35441642) within the *DCLRE1C* locus for J-gene trim-

197 ming of non-productive TCRs (**Figure 4–source data 2**). None of the other nucleotide trimming type,  
198 productivity status combinations had significant evidence for secondary independent signals.

199 Our procedure also identified many highly significant associations between 5' end D-gene  
200 trimming and SNPs within the *TCRB* gene locus, however these appear to result from correlations  
201 between SNP genotype and *TRBD2* allele genotype (**Figure 3–Figure Supplement 1**). If we correct  
202 for *TRBD2* allele genotype in our model formulation (see Methods), we no longer observe these  
203 associations between SNPs within the *TCRB* gene locus and the extent of 5' end D-gene trimming  
204 (**Figure 3–Figure Supplement 2**). *TRBD2* allele genotype could be acting as a confounding variable  
205 due to linked local genetic variation which influences nucleotide trimming and/or D-gene assignment  
206 ambiguity variation as a function of *TRBD2* allele genotype. To explore the extent of possible D-gene  
207 assignment ambiguity variation, we restricted our analysis to TCRs which contain *TRBJ1* genes (and  
208 consequently contain *TRBD1* due to topological constraints during V(D)J recombination (**Robins et al.,**  
209 **2010; Murphy and Weaver, 2016**)). With this approach, we also no longer observe associations  
210 between SNPs within the *TCRB* gene locus and the extent of 5' end D-gene trimming, and additionally,  
211 we do observe significant associations between SNPs within the *DCLRE1C* locus and 5' and 3' end  
212 D-gene trimming which were not observed in the original genome-wide analysis (**Figure 3–Figure**  
213 **Supplement 3**).

214 Our fixed effects model formulation for these inferences is important: if we don't condition  
215 on gene choice then additional, and presumably spurious, associations arise. Indeed, when  
216 implementing the “simple model” designed to quantify the association between the four trimming  
217 types and genome-wide SNP genotypes, without conditioning out the effect mediated by gene  
218 choice, we observe additional associations between SNPs within the MHC locus and V-gene trimming  
219 of productive TCRs and between SNPs within the *TCRB* locus and V-gene and 3' end D-gene trimming  
220 of, again, productive TCRs (**Figure 3–Figure Supplement 5**). This is perhaps not surprising, as we  
221 noted earlier that variations in the MHC and *TCRB* loci are associated with gene usage frequencies in  
222 productive TCRs (**Figure 1**), and different genes have different trimming distributions (determined  
223 in part by the nucleotide sequences at their termini).

224 Because P-nucleotides can be present at V(D)J junctions in the absence of nucleotide trim-  
225 ming (**Murphy and Weaver, 2016**), we hypothesized that similar *DCLRE1C* locus variation may also  
226 be associated with P-addition. Interestingly, we did not identify any strong associations between  
227 SNPs within the *DCLRE1C* locus and the fraction of non-gene-trimmed TCRs containing P-nucleotides  
228 when implementing our “gene-conditioned model”, despite the known role of the Artemis protein  
229 in functioning as an endonuclease responsible for cutting the hairpin intermediate, and thus,  
230 potentially creating P-nucleotides during V(D)J recombination (**Figure 3–Figure Supplement 6**). We  
231 observe similar results when quantifying the effect of genome-wide SNPs on the number of V-, D-,  
232 and J-gene P-nucleotides per TCR (**Figure 3–Figure Supplement 7**).

233 ***DNTT* locus variation is associated with the number of V-D and D-J N-insertions**

234 Unlike V-, D-, or J-gene nucleotide trimming length, the number of nucleotide N-insertions between  
235 V-D and D-J genes does not vary substantially with V(D)J *TCRB* gene choice (**Figure 5–Figure Supple-**  
236 **ment 1**) (*Murugan et al., 2012*). Thus, to infer the association between SNPs and the number of  
237 nucleotide N-insertions, we implemented a “simple model”, without conditioning out any effect  
238 mediated by gene choice. Again, because of the potential for population-substructure-related  
239 effects to inflate associations between each SNP and the number of N-insertions, we incorporated  
240 ancestry-informative principal components as covariates in each model (detailed in Methods).  
241 Diagnostic statistics show that this bias correction is sufficient (**Figure 5–source data 3**).

242 With these methods, we identified three associations between SNPs and the number of nu-  
243 cleotide N-insertions using a Bonferroni-corrected whole-genome P-value significance threshold  
244 of  $1.94 \times 10^{-9}$  (see Methods) (**Figure 5** and **Figure 5–source data 1**). Two SNPs within the *DNTT*  
245 gene locus (rs2273892 and rs12569756) were responsible for these associations. The *DNTT* gene  
246 encodes the terminal deoxynucleotidyl transferase (TdT) protein which is a specialized DNA poly-  
247 merase responsible for adding non-templated (N) nucleotides to coding junctions during V(D)J  
248 recombination. When we restrict our analysis to TCRs which contain *TRBJ1* genes and consequently  
249 eliminate potential D-gene assignment ambiguity, we continue to observe these *DNTT* associations  
250 (**Figure 5–Figure Supplement 2**).

251 Since the TdT protein has an important mechanistic role in the N-insertion process and because  
252 we already identified SNPs within the *DNTT* locus to be weakly associated with the number of  
253 N-insertions at V(D)J gene junctions, we wanted to explore the locus further. Restricting the  
254 analysis to the extended *DNTT* locus reduced the multiple testing burden such that 232 significant  
255 associations emerged (**Figure 5** and **Figure 5–source data 2**). Many of the SNPs responsible for  
256 these 232 significant associations within the extended *DNTT* locus were shared between insertion  
257 and productivity types (**Figure 6**). While most of these associations are likely the result of a single  
258 independent signal for each insertion and productivity type, we performed a conditional analysis  
259 to identify potential independent secondary signals. To do so, we included the most significant  
260 SNP within the *DNTT* locus for each insertion and productivity type as a covariate in the model.  
261 With this approach, we identified rs2273892 as the primary independent signal for D-J N-insertion  
262 of non-productive TCRs and rs12569756 as the primary independent signal for D-J N-insertion of  
263 productive TCRs and V-D N-insertion of productive and non-productive TCRs. However, these two  
264 SNPs are tightly linked and, thus, likely both represent the same, primary independent signal. This  
265 analysis did not reveal any significant evidence for secondary independent signals.

266 We found that correcting for population-substructure-related effects was especially important  
267 in our primary genome-wide analysis, which led us to discover differences in the extent of N-  
268 insertion by ancestry-informative PCA cluster. Indeed, if we don't incorporate correction terms



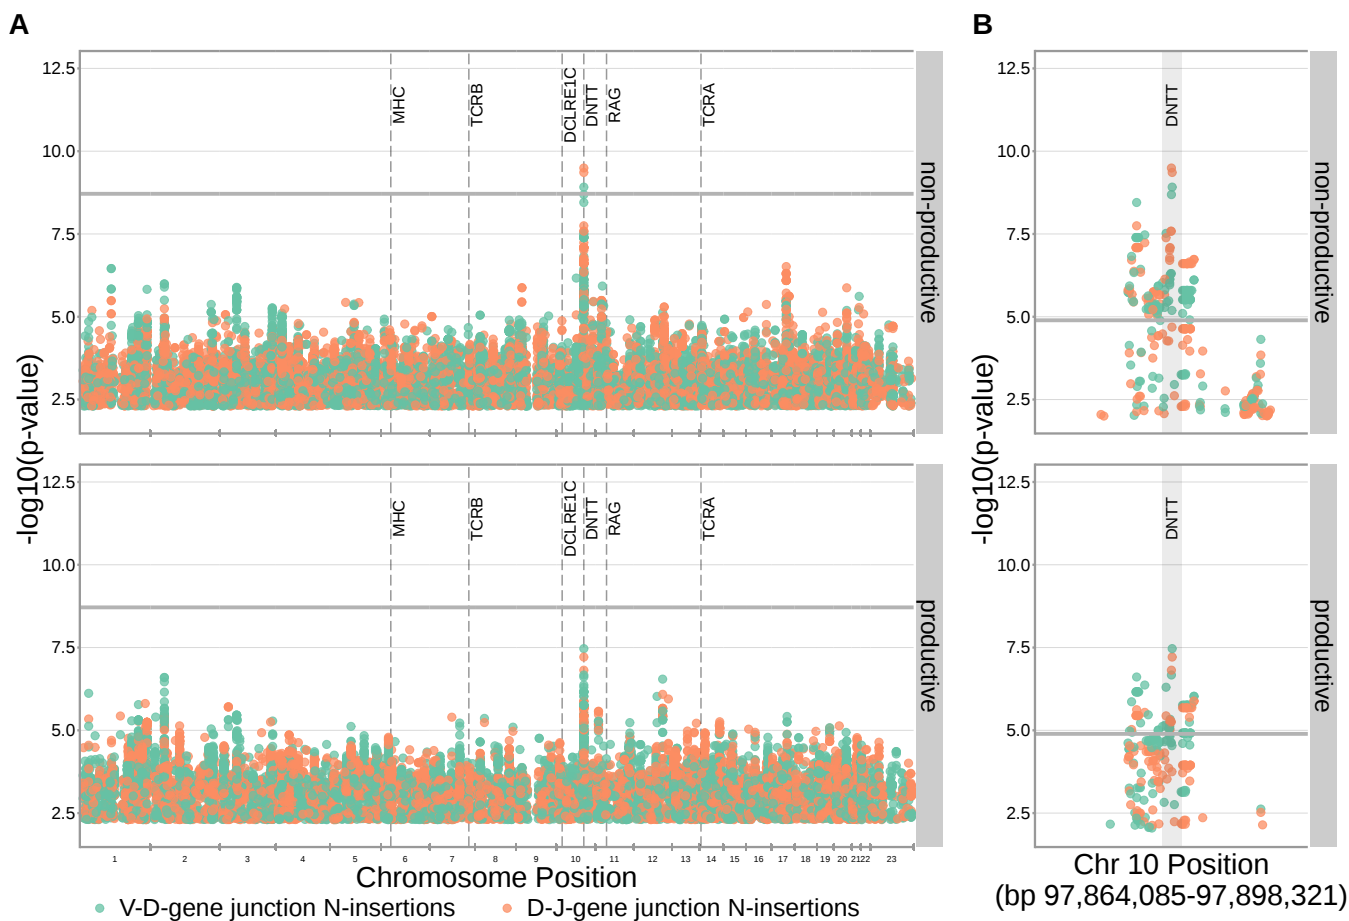

**Figure 5.** SNPs within the *DNTT* locus are associated with the extent of N-insertion. **(A)** There are three associations for SNPs within the *DNTT* locus which are significant when considered in the whole-genome context. The gray horizontal line corresponds to a whole-genome Bonferroni-corrected P-value significance threshold of  $1.94 \times 10^{-9}$ . **(B)** Using a *DNTT* gene-level significance threshold, many more SNPs within the extended *DNTT* locus have significant associations for both N-insertion types. Here, the gray horizontal line corresponds to a gene-level Bonferroni-corrected P-value significance threshold of  $1.28 \times 10^{-5}$  (calculated using gene-level Bonferroni correction for the 977 SNPs within 200kb of the *DNTT* locus, see Methods). For both (A) and (B), only SNP associations whose  $P < 5 \times 10^{-3}$  are shown.

**Figure 5-source data 1.** There are three significant associations between SNPs genome-wide and the number of nucleotide N-insertions. The model type and Bonferroni-corrected P-value significance threshold used to identify these significant associations are described in [Table 1](#).

**Figure 5-source data 2.** There are 232 significant associations between SNPs genome-wide and the number of nucleotide N-insertions when restricting the analysis to the extended *DNTT* locus.

**Figure 5-source data 3.** Genomic inflation factor values are less than 1.03 for all paired N-insertion, productivity GWAS analyses. This suggests that we have properly controlled for population-substructure-related biases in all of the N-insertion analyses. Genomic inflation factor values were calculated as described in Methods.

**Figure 5-figure supplement 1.** The extent of N-insertion does not vary substantially by the gene allele identity for any gene type.

**Figure 5-figure supplement 2.** Significant associations continue to be observed within the *DNTT* locus for both V-D- and D-J-gene-junction N-insertions when restricting the analysis to TCRs which contain *TRBJ1* genes (and consequently contain *TRBD1*).

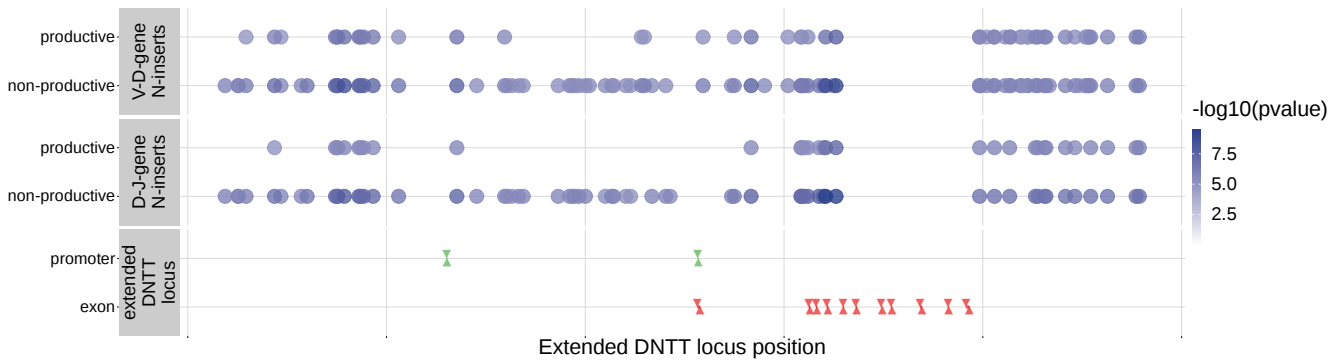

**Figure 6.** Within the *DNTT* locus, many of the significant SNP associations overlapped between N-insertion types when using *DNTT* gene-level Bonferroni-corrected P-value significance threshold of  $1.28 \times 10^{-5}$ . Downward arrows represent promoter/exon starting positions and upward arrows represent promoter/exon ending positions.

**Figure 6-source data 1.** *DNTT* locus SNP association P-values and locus positions.

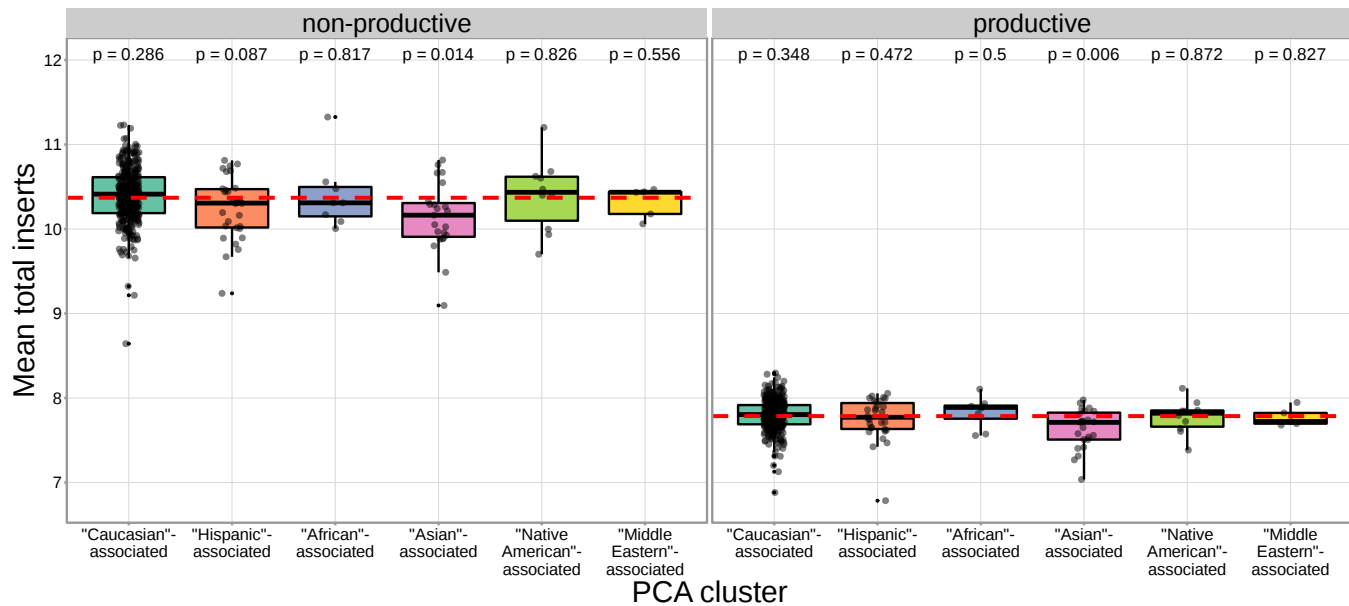

**Figure 7.** The TCR repertoires for subjects in the “Asian”-associated PCA-cluster contain fewer N-insertions for productive TCRs when compared to the population mean computed across all 666 subjects (dashed, red horizontal line). The P-values from a one-sample t-test (without Bonferroni multiple testing correction) for each PCA cluster compared to the population mean are reported at the top of the plot.

**Figure 7-source data 1.** PCA-cluster and average number of N-insertions by subject.

**Figure 7-Figure supplement 1.** The population mean is dominated by subjects in the “Caucasian”-associated PCA-cluster.

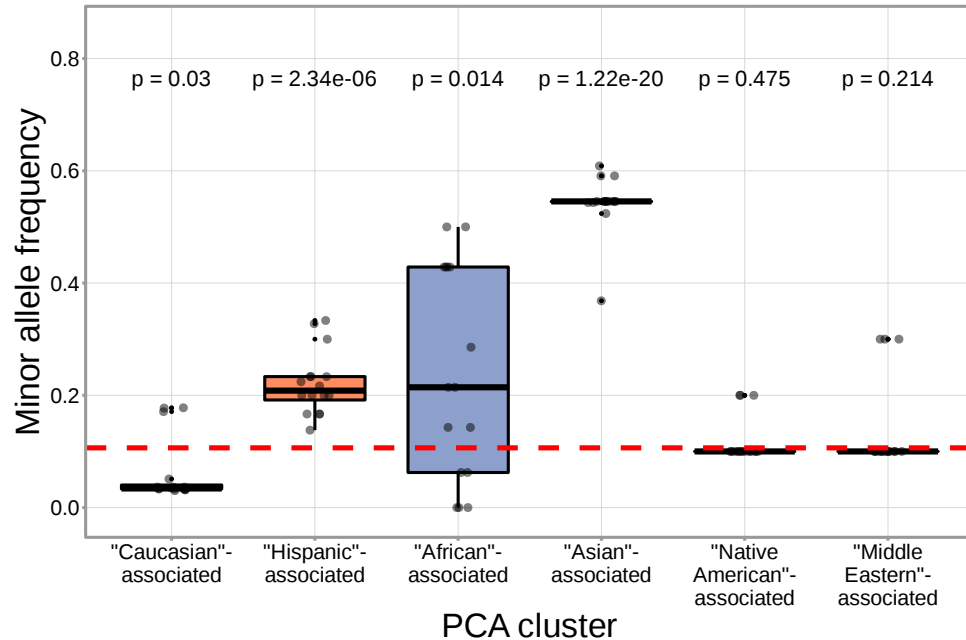

**Figure 8.** N-insertion associated SNPs within the *DNTT* region have a higher mean minor allele frequency within the "Asian"-associated PCA-cluster when compared to the population mean minor allele frequency computed across the 398 discovery cohort subjects (dashed, red horizontal line). The P-values from a one-sample t-test (without Bonferroni multiple testing correction) for each PCA cluster compared to the population mean are reported at the top of the plot. The population mean is dominated by subjects in the "Caucasian"-associated PCA cluster (*Figure 7–Figure Supplement 1*).

**Figure 8–source data 1.** Minor allele frequency for N-insertion associated SNPs within the *DNTT* locus by PCA-cluster.

269 for population-substructure-related biases in our model formulation, we observe many strongly  
270 significant associations, particularly within the *DNTT* locus. This hinted at important PCA-cluster  
271 level effects. When we look closely at the average number of N-insertions (combining the number  
272 of V-D and D-J N-insertions) across TCR repertoires by PCA cluster, we note that subjects from the  
273 "Asian"-associated PCA cluster have significantly fewer total N-insertions for productive ( $P = 0.006$   
274 without Bonferroni correction) and non-productive ( $P = 0.014$  without Bonferroni correction) TCRs  
275 when compared to the population mean (using a one-sample t-test) (*Figure 7*). The total N-insertions  
276 for productive TCRs within the "Asian"-associated PCA cluster remain significantly different from the  
277 population mean after Bonferroni multiple testing correction (corrected  $P = 0.036$ ). Furthermore,  
278 the "Asian"- and "Hispanic"-associated PCA clusters had significantly higher mean SNP minor allele  
279 frequencies for N-insertion associated SNPs within the extended *DNTT* region when compared  
280 to the mean population minor allele frequency ( $P = 7.32 \times 10^{-20}$  for the "Asian"-associated PCA  
281 cluster and  $P = 1.17 \times 10^{-5}$  for the "Hispanic"-associated PCA cluster using a one-sample t-test with  
282 Bonferroni multiple testing correction) (*Figure 8*).

**Table 2.** We inferred the associations between SNP genotype and TCR repertoire features for two SNPs overlapping between discovery-cohort and validation-cohort SNP sets. We considered the significance of the validation cohort associations at a Bonferroni-corrected SNP-level P-value significance threshold of 0.0042 for trimming and 0.0083 for N-insertion (see Methods). Validation cohort P-values are one-tailed. \* discovery-cohort associations were only significant when considered at the *DNTT* -gene level significance threshold, not at the whole-genome significance threshold.

| SNP             | TCR chain      | Repertoire feature | Productivity type              | Discovery cohort signif. association | Validation cohort signif. association |
|-----------------|----------------|--------------------|--------------------------------|--------------------------------------|---------------------------------------|
| rs12768894      | TCR $\beta$    | V-gene trimming    | Productive                     | Yes ( $2.16 \times 10^{-14}$ )       | Yes ( $7.17 \times 10^{-7}$ )         |
|                 |                |                    | Non-productive                 | Yes ( $7.21 \times 10^{-14}$ )       | Yes ( $8.75 \times 10^{-6}$ )         |
|                 | TCR $\alpha$   | J-gene trimming    | Productive                     | Yes ( $1.23 \times 10^{-11}$ )       | Yes ( $5.16 \times 10^{-10}$ )        |
|                 |                |                    | Non-productive                 | Yes ( $6.62 \times 10^{-12}$ )       | No ( $4.18 \times 10^{-2}$ )          |
|                 |                | V-gene trimming    | Productive                     | N/A                                  | Yes ( $2.59 \times 10^{-5}$ )         |
|                 |                |                    | Non-productive                 | N/A                                  | Yes ( $2.68 \times 10^{-7}$ )         |
| J-gene trimming | Productive     | N/A                | Yes ( $6.29 \times 10^{-12}$ ) |                                      |                                       |
|                 | Non-productive | N/A                | No ( $9.99 \times 10^{-3}$ )   |                                      |                                       |
| rs3762093       | TCR $\beta$    | V-D N-insertion    | Productive                     | Yes* ( $1.37 \times 10^{-6}$ )       | No (0.153)                            |
|                 |                |                    | Non-productive                 | Yes* ( $1.50 \times 10^{-7}$ )       | No (0.059)                            |
|                 | TCR $\alpha$   | D-J N-insertion    | Productive                     | Yes* ( $9.43 \times 10^{-6}$ )       | No (0.137)                            |
|                 |                |                    | Non-productive                 | Yes* ( $1.94 \times 10^{-7}$ )       | No (0.067)                            |
|                 |                | V-J N-insertion    | Productive                     | N/A                                  | Yes (0.006)                           |
|                 |                |                    | Non-productive                 | N/A                                  | No (0.031)                            |

**Table 2-Figure supplement 1.** The extent of V- and J-gene trimming of productive and non-productive TCR $\beta$  chains changes as a function of SNP genotype within the discovery cohort for a non-synonymous *DCLRE1C* SNP (rs12768894, c.728A>G).

**Table 2-Figure supplement 2.** The extent of J-gene trimming of productive TCR $\beta$  chains and V-gene trimming of productive and non-productive TCR $\beta$  chains also changes as a function of rs12768894 genotype within the validation cohort.

**Table 2-Figure supplement 3.** The extent of V- and J-gene trimming of productive and non-productive TCR $\alpha$  chains also changes as a function of SNP genotype within the validation cohort for this SNP (rs12768894, c.728A>G).

**Table 2-Figure supplement 4.** The extent of V-D and D-J N-insertion of productive and non-productive TCR $\beta$  chains changes as a function of SNP genotype within the discovery cohort for an intronic *DNTT* SNP (rs3762093).

**Table 2-Figure supplement 5.** rs3762093 genotype is not significantly associated with the number of V-D or D-J N-inserts within productive or non-productive TCR $\beta$  chains in the validation cohort, but the direction of the effect is the same as the discovery cohort for all N-insertion and productivity types.

**Table 2-Figure supplement 6.** This SNP (rs3762093) is significantly associated with the number of V-J N-inserts for productive TCR $\alpha$  chains, but not for non-productive TCR $\alpha$  chains, in the validation cohort. However, the effect is stronger for both productivity types compared to TCR $\beta$  chains.

## 283 Validation Analysis

284 To validate our results, we worked with paired ancestry-informative marker (AIM) SNP array and  
 285 TCR $\alpha$ - and TCR $\beta$ -immunosequencing data representing 94 individuals and 2 SNPs (which overlap  
 286 with the discovery dataset) from an independent validation cohort (see Methods). In contrast  
 287 to the discovery cohort, this cohort contains different demographics, shallower RNA-seq based  
 288 TCR-sequencing, and a sparser set of SNPs. However, TCR-sequencing for both TCR $\alpha$  and TCR $\beta$   
 289 chains is available.

290 We were able to validate a discovery-cohort significantly associated *DCLRE1C* SNP within this  
 291 validation cohort. While none of the independent *DCLRE1C* SNPs from the discovery-cohort anal-  
 292 ysis overlapped with the validation cohort SNP set, a single, non-synonymous SNP (rs12768894,  
 293 c.728A>G) within the *DCLRE1C* locus was present in both SNP sets. This SNP was one of the signifi-  
 294 cant associations we observed for V-gene trimming (productive  $P = 2.16 \times 10^{-14}$ ; non-productive  
 295  $P = 7.21 \times 10^{-14}$ ) and J-gene trimming (productive  $P = 1.23 \times 10^{-11}$ ; non-productive  $P = 6.62 \times 10^{-12}$ )  
 296 of TCR $\beta$  chains in the genome-wide discovery cohort analysis (**Table 2-Figure Supplement 1**). Using

297 the same methods, we identified significant associations between this SNP and J-gene trimming  
298 of productive TCR $\alpha$  and TCR $\beta$  chains and V-gene trimming of both productive and non-productive  
299 TCR $\alpha$  and TCR $\beta$  chains within the validation cohort (**Table 2**, **Table 2-Figure Supplement 2**, and **Table 2-Figure Supplement 3**). Associations between rs12768894 and both types of D-gene trimming  
300 of TCR $\beta$  chains were not significant for either cohort.  
301

302 We were unable to validate the most significantly associated *DNTT* SNPs due to lack of overlap  
303 between the SNP sets for the discovery and validation cohorts; a discovery-cohort weakly associated  
304 SNP (rs3762093) failed to reach statistical significance for all N-insertion types, but had the same  
305 direction of effect in the validation cohort as follows. Within the discovery cohort, rs3762093  
306 genotype was weakly associated with the number of V-D N-insertions (productive  $P = 1.37 \times 10^{-6}$ ;  
307 non-productive  $P = 1.50 \times 10^{-7}$ ) and D-J N-insertions (productive  $P = 9.43 \times 10^{-6}$ ; non-productive  
308  $P = 1.94 \times 10^{-7}$ ) within TCR $\beta$  chains (**Table 2-Figure Supplement 4**). Within the validation cohort, this  
309 SNP was significantly associated with the number of V-J N-insertions within productive TCR $\alpha$  chains  
310 (**Table 2** and **Table 2-Figure Supplement 6**). However, this SNP was not significantly associated with  
311 the number of V-D or D-J N-insertions within productive or non-productive TCR $\beta$  chains or the  
312 number of V-J N-insertions within non-productive TCR $\alpha$  chains within the validation cohort (**Table 2**,  
313 **Table 2-Figure Supplement 5**, and **Table 2-Figure Supplement 6**). Despite the lack of significance,  
314 we noted that the model coefficients for rs3762093 genotype were in the same direction (i.e., the  
315 minor allele was associated with fewer N-insertions) for all N-insertion and productivity types within  
316 TCR $\beta$  chains for both cohorts. Further, while TCR $\alpha$  chain sequencing was not available for the  
317 discovery cohort, we observed stronger associations between rs3762093 genotype and the extent  
318 of N-insertion for both productivity types within TCR $\alpha$  chains compared to TCR $\beta$  chains within the  
319 validation cohort. Perhaps with a larger validation cohort, significant associations would be present  
320 for all N-insertion types.

## 321 Discussion

322 V(D)J recombination is a complex stochastic process that enables the generation of diverse TCR  
323 repertoires. Our results show that genetic variation in various V(D)J recombination genes has a  
324 key role in shaping the TCR repertoire through biasing V(D)J gene choice, nucleotide trimming, and  
325 N-insertion in a broad population sample. While we recognize that there may be a complicated  
326 entanglement between allelic variation and local *cis*-acting effects, we were primarily interested  
327 in identifying strong, *trans*-acting associations. By leveraging the unique pairing of TCR $\beta$  chain  
328 immunosequencing and genome-wide genotype data, we have (1) confirmed and extended previous  
329 studies on the genetic determinants of TCR V-gene usage, (2) discovered associations between  
330 common genetic variants within the *DCLRE1C* and *DNTT* loci and V(D)J junctional trimming and  
331 N-insertions, respectively, (3) developed a method for quantifying the extent of the associations  
332 between genetic variations and junctional features, directly, without confounding gene choice

333 effects, and (4) revealed differences in the extent of N-insertion by ancestry-informative PCA cluster.

334 We note an abundance of associations between variation in the *TCRB* locus and V(D)J gene usage  
335 biases for both productive and non-productive TCRs. Although previous reports have revealed  
336 similar patterns of association for productive TCRs (*Sharon et al., 2016; Gao et al., 2019*), our results  
337 refine and extend this result by quantifying the extent of *TCRB* locus variation on V(D)J gene usage for  
338 non-productive TCRs. This highlights that locus variation is associated with TCR generation-related  
339 gene usage biases, in addition to potential thymic selection biases for productive TCRs. These  
340 TCR generation-related gene usage biases likely reflect local gene regulation and/or recombination  
341 efficiency effects. For example, one of the SNPs most significantly associated with *TRBV28* expression  
342 (rs17213) is located within the recombination signal sequence at the 3'-end of the gene and, thus,  
343 could be involved directly in changing the recombination efficiency of *TRBV28*. Thus, different  
344 expression levels of various genes could be promoted by variation within non-coding regions  
345 such as promoters, 5'UTRs and leader sequences, introns, or recombination signal sequences.  
346 Polymorphisms within these regions have been suggested to influence V(D)J gene expression levels  
347 within B-cell receptor repertoires (*Mikocziova et al., 2021*). We also observed that variation in the  
348 MHC locus is associated with V-gene usage biases for productive TCRs, but not non-productive  
349 TCRs. These MHC locus associations are likely only observed for V-gene usage since the V-gene  
350 locus, exclusively, encodes the TCR regions (complementarity-determining regions 1 and 2) which  
351 directly contact MHC during peptide presentation (*Murphy and Weaver, 2016*). Previous work has  
352 suggested that the thymic selection of certain V-genes may be biased by germline-encoded TCR-  
353 MHC compatibilities in an MHC dependent manner (*Sharon et al., 2016; Gao et al., 2019*). Because  
354 of our observed distinction between associations present between MHC variation and V-gene usage  
355 in productive versus non-productive TCRs, our work supports this hypothesis.

356 We have identified, for the first time, specific genetic variants which are associated with modify-  
357 ing the extent of N-insertion and nucleotide trimming. While many previous studies have reported  
358 evidence of genetic influences on overall gene usage (*Zvyagin et al., 2014; Qi et al., 2016; Rubelt  
359 et al., 2016; Pogorelyy et al., 2018; Tanno et al., 2020; Fischer et al., 2021*) and repertoire similarity  
360 in response to acute infection (*Qi et al., 2016; Pogorelyy et al., 2018*), there have been few ex-  
361 plorations into how heritable factors may bias TCR junctional features beyond reports of genetic  
362 similarity implying overall TCR repertoire similarity (*Krishna et al., 2020; Rubelt et al., 2016*). Here,  
363 we noted that variation in the gene encoding the Artemis protein (*DCLRE1C*) is associated with  
364 the extent of V- and J-gene nucleotide trimming for both productive and non-productive TCRs.  
365 These associations are strongest for non-productive TCRs suggesting a TCR generation-related  
366 repertoire bias. It is well established that the Artemis protein, in complex with DNA-PKcs, functions  
367 as an endonuclease responsible for cutting the hairpin intermediate, and thus, potentially creat-  
368 ing P-nucleotides prior to nucleotide trimming during V(D)J recombination (*Weigert et al., 1978;  
369 Moshous et al., 2001; Ma et al., 2002; Lu et al., 2007*). The direct involvement of Artemis in the



370 nucleotide trimming mechanism, however, has yet to be confirmed. It has been shown that the  
371 Artemis protein possesses single-strand-specific 5' to 3' exonuclease activity (*Ma et al., 2002; Li*  
372 *et al., 2014*) and, thus, may be properly positioned to trim nucleotides. A non-synonymous SNP  
373 within *DCLRE1C* (rs12768894, c.728A>G) was one of the significant associations we observed for V-  
374 and J-gene nucleotide trimming in both the primary cohort and the independent validation cohort.  
375 Perhaps this mutation, or other linked non-synonymous *DCLRE1C* variation that was not studied  
376 here, is directly involved in the trimming changes we observe. We did not observe strong associ-  
377 ations between variation in the *DCLRE1C* locus and the number of P-nucleotides or the fraction  
378 of non-gene-trimmed TCRs containing P-nucleotides, despite the established mutually exclusive  
379 relationship between P-addition and nucleotide trimming (*Gauss and Lieber, 1996; Srivastava and*  
380 *Robins, 2012; Murphy and Weaver, 2016*). However, the absence of P-nucleotide associations at the  
381 *DCLRE1C* locus could be the result of restricting the analyses to the non-gene-trimmed repertoire  
382 subset. Perhaps with a larger dataset these associations would be present.

383 Further, we have identified associations between variation in the gene encoding the TdT protein  
384 (*DNTT*) and the number of N-insertions for both productive and non-productive TCRs. Because of  
385 the established, direct involvement of the TdT protein in the N-insertion mechanism, these *DNTT*  
386 locus variations could be influencing the function of the TdT protein. These significant associations  
387 were slightly stronger for non-productive TCRs perhaps suggesting that thymic selection may limit  
388 the mechanistic effects of locus variation. Interestingly, we noted that the extent of N-insertion  
389 varies by ancestry-informative PCA cluster. Specifically, we found that the "Asian"-associated PCA  
390 cluster had significantly fewer N-insertions for productive TCRs when compared to the population  
391 mean which is dominated by the "Caucasian"-associated PCA cluster. This finding is, perhaps,  
392 related to the influence of broad heritable factors biasing the extent of N-insertions.

393 More work is required to elucidate the mechanistic relationship between *DCLRE1C* locus variation  
394 and nucleotide trimming changes. Future work can also focus on identifying correlations between  
395 TCR repertoires and host immune exposures while accounting for genetically determined repertoire  
396 biases identified here. These directions would allow us to continue disentangling the genetic and  
397 environmental determinants governing TCR repertoire diversity.

398 One limitation of our approach is the possibility that the SNP array data used here does not  
399 capture all potential causal variation. Further, the lack of overlap between SNP sets for the discovery  
400 and validation cohorts limited our ability to directly validate our strongest inferences. Another key  
401 constraint is the challenge of inferring the V(D)J rearrangements from the final nucleotide sequences.  
402 Therefore, there is the potential for biases resulting from incorrect V(D)J -gene assignment. We have  
403 found that controlling for D-gene assignment ambiguity in the nucleotide trimming and N-insertion  
404 analyses results in similar significant associations within the *DNTT* and *DCLRE1C* loci. Although we  
405 cannot rule out some effect of incorrect V(D)J -gene assignment bias for *trans* associations resulting  
406 from the signal being "masked" by stronger *TCRB* locus signals, these biases seem to be mostly



407 restricted to *cis* associations.

408 In summary, we have found that the usage of *TCRB* genes is associated with variation in MHC and  
409 *TCRB* loci, the number of N-insertions is associated with *DNTT* variation, and the extent of nucleotide  
410 trimming is associated with *DCLRE1C* variation. Our results clearly demonstrate how variation in  
411 V(D)J recombination-related genes can bias TCR repertoire combinatorial and junctional diversity. In  
412 the case of B cells, genetically determined V(D)J gene usage biases within B-cell receptor repertoires  
413 have been linked to functional consequences for the overall immune response to specific antigens  
414 and, thus, an increased susceptibility to certain diseases (*Mikocziova et al., 2021*). As such, the  
415 genetic TCR repertoire biases identified here lay the groundwork for further exploration into the  
416 diversity of immune responses and disease susceptibilities between individuals. Such studies will  
417 enhance our understanding of how an individual's diverse TCR repertoire can support a unique,  
418 robust immune response to disease and vaccination. Our findings also provide a step towards the  
419 ability to understand and predict an individual's TCR repertoire composition which will be critical for  
420 the future development of personalized therapeutic interventions and rational vaccine design.

## 421 **Methods and Materials**

### 422 **Discovery cohort dataset**

423 *TCR $\beta$*  repertoire sequence data for 666 healthy bone marrow donor subjects was downloaded from  
424 the Adaptive Biotechnologies website using the link provided in the original publication (*Emerson*  
425 *et al., 2017*). For both the discovery and validation cohorts, V, D, and J genes were assigned by  
426 comparing the *TCR $\beta$* -chain (and *TCR $\alpha$* -chain for the validation cohort) nucleotide sequences to the  
427 human IMGT/GENE-DB *TCRB* (or *TCRA*) allele sequences (*Giudicelli et al., 2005*). To infer the extent  
428 of nucleotide trimming, N-insertion, and P-addition for each *TCR $\beta$* -chain (and *TCR $\alpha$* -chain) nucleotide  
429 sequence, the most parsimonious V(D)J recombination scenario was assigned to each sequence  
430 using the TCRdist pipeline (*Dash et al., 2017*). The V(D)J recombination scenario requiring the fewest  
431 N-insertions was defined as the most parsimonious scenario.

432 SNP array data corresponding to 398 of these subjects was downloaded from The database  
433 of Genotypes and Phenotypes (accession number: phs001918). Details of the SNP array dataset,  
434 genotype imputation, and quality control have been described previously (*Martin et al., 2020*).

### 435 **Validation cohort dataset**

436 Peripheral blood mononuclear cell (PBMC) samples were collected from 150 healthy subjects  
437 recruited at the Health Center Sócrates Flores Vivas (HCSFV) in Managua, Nicaragua (*Ng et al., 2016*).  
438 Healthy participants were recruited as contacts of influenza infected index patients and blood  
439 samples were collected at both the initial visit and a 30 day follow-up visit. Participants provided  
440 written informed consent and parental permission was obtained from parents or legal guardians  
441 of children, in addition to verbal assent from children aged six years and older. This study was

442 approved by the Institutional Review Boards at the University of Michigan, Centro Nacional de  
443 Diagnóstico y Referencia (Ministry of Health, Nicaragua), and University of California, Berkeley.

444 With these samples, PBMCs were stained with CD3-PerCP eFluor710 (Thermo Cat. 46-0037-42),  
445 CD4-BV650 (BD Biosciences Cat. 563875), CD8-APC Fire750 (Biolegend Cat. 344746), and gdCy7  
446 (Biolegend Cat. 331222). Briefly, after thawing from cryopreservation and plating in a 96-well round  
447 bottom plate, cells were spun down and resuspended in 50  $\mu$ L of human Fc block (BD Biosciences  
448 Cat. 564220) in Dulbecco's phosphate-buffered saline (DPBS) at 1  $\mu$ L per test (1 test =  $1.0 \times 10^6$  cells)  
449 and incubated for 10 minutes at room temperature. Afterwards, 50  $\mu$ L of a Live/Dead Aqua (Tonbo  
450 Cat. 13-0870-T100, 1  $\mu$ L per test, 1 test =  $1.0 \times 10^6$  cells) and pre-titrated surface antibody cocktail  
451 in DPBS were added to each well and cells were incubated for 30 minutes on ice and in the dark.  
452 Cells were washed, resuspended in sort buffer and bulk sorted into polystyrene tubes. Afterwards,  
453 samples were spun down, pellets were resuspended in 350  $\mu$ L of RNA lysis buffer, and stored at -80  
454 C in labeled epitubes.

455 From here, DNA was extracted from 200  $\mu$ L of neutrophil pellets using the Qiagen QIAamp  
456 DNA Mini Kit (Cat. 51306). Bulk repertoires for sorted CD4 and CD8 T cells were generated in  
457 accordance with the protocol developed by *Egorov et al. (2015)*, and sequencing was performed on  
458 the NovaSeq by the Hartwell Center at St. Jude. Raw cDNA sequencing data were processed with the  
459 MIGEC software package (*Shugay et al., 2014*) to define error-corrected TCRA and TCRB transcript  
460 sequences, which were then analyzed as described above for the discovery cohort data (*Emerson*  
461 *et al., 2017*).

462 Genotypes for SNPs of interest corresponding to 94 of these subjects were pulled from Infinium  
463 Global Screening Array-24 v3.0 BeadChip results, which measures 654,027 SNP makers including  
464 multi-ethnic genome-wide content, curated clinical research variants, and quality control markers.  
465 High quality DNA was extracted using the Qiagen QIAamp DNA Mini Kit (Cat. 51306), and submitted  
466 to the St. Jude Hartwell Center for preparation and processing. Two SNPs, rs72640001 and  
467 rs72772435, were not included on this chip and were determined using Thermo Fisher TaqMan SNP  
468 Genotyping Assays (Cat. 4351379, Assay ID C\_99271581\_10 and C\_99587751\_10, respectively) and  
469 TaqMan Genotyping Master Mix (Cat. 4371353) according to the kit manual.

## 470 **Data preparation**

471 With these paired SNP array and TCR-immunosequencing for both the discovery and validation  
472 cohorts, we aimed to identify significant associations between these SNPs and various TCR reper-  
473 toire features. Because we would expect a difference in these phenotypes depending on whether  
474 a TCR sequence is classified as productive or non-productive, we split the data based on this TCR  
475 productivity status and computed associations separately for the two groups.

476 We also subset the SNP data further based on several quality control metrics. We filtered the  
477 SNP array data to use only SNPs with a minor allele frequency above 0.05 in our analyses which

478 excluded SNPs for which all subjects had the same genotype. For the discovery cohort, this filtering  
479 procedure and previous quality control (*Martin et al., 2020*) left 6,456,824 SNPs (of the original 35  
480 million SNPs) remaining for our analyses. Only 2 SNPs from the validation cohort overlapped with  
481 this discovery cohort SNP set. For each of these discovery and validation cohort SNPs, when fitting  
482 each association model, we excluded observations which contained a missing SNP genotype. Next,  
483 for the TCR repertoire data, we excluded repertoires which contained a relatively small number  
484 of TCRs ( $\log_{10}(\text{TCR count}) < 4.25$  for productive TCRs and  $\log_{10}(\text{TCR count}) < 3.5$  for non-productive  
485 TCRs) from the analyses. Lastly, for TCR $\beta$ -chains, if a D-gene is trimmed so much that the D-gene  
486 is unidentifiable, the inference pipeline used to infer *TCRB* genes for each sequenced TCR does  
487 not report a D-gene. Instead, this D-gene (if it is indeed present) is reported as a V-J N-insertion.  
488 Because of this, we excluded these observations when fitting models for TCR features involving the  
489 D-gene (i.e. D-gene usage, both V-D and D-J junction N-insertions, D-gene P-additions, and D-gene  
490 nucleotide trimming).

## 491 **Notation**

492 The discovery dataset contains observations for a total of  $I = 398$  subjects and the validation dataset  
493 contains observations for a total of  $I = 94$  subjects. Within each cohort, for subject  $i \in \{1, \dots, I\}$ ,  
494 we observe a total of  $N_i$  TCRs which, here, represents the number of TCRs which compose each  
495 subject's TCR repertoire. Thus, for each TCR  $k \in \{1, \dots, N_i\}$ , we measure a TCR feature of interest,  $y_{ik}$ ,  
496 such as the number of V-D N-insertions, the extent of V-trimming, etc. We also have SNP genotype  
497 data for a total of  $J$  SNPs such that for each SNP  $j \in \{1, \dots, J\}$  and subject  $i \in \{1, \dots, I\}$ , we measure  
498 the number of minor alleles in the genotype,  $x_{ij} \in \{0, 1, 2\}$ .

## 499 **Quantifying the association strength between each SNP and TCR feature using the** 500 **"simple model"**

501 We first describe what we call the "simple model". We will describe more complex models, as well  
502 as each model with added correction for population-substructure-related effects, in the sections  
503 following.

504 We began by calculating the average occurrence of the TCR feature of interest,  $\bar{y}_i$ , within the  
505 repertoire of each subject,  $i$ . By condensing the data in this way, for each subject  $i \in \{1, \dots, I\}$ ,  
506 we are left with  $N_i = 1$  observations. For example, for the discovery cohort, we can fit the model  
507 across  $\sum_{i=1}^I N_i = 398$  observations. Using this condensed dataset, for each SNP, TCR feature, and  
508 productivity status, we can fit the model:

$$\bar{y}_i = x_{ij} \cdot \beta_{1j} + \beta_0 + \epsilon_{ij} \quad (1)$$

509 where  $\beta_{1j}$  is the allele effect for SNP  $j$  on the TCR feature of interest  $\bar{y}_i$ ,  $\beta_0$  is the intercept, and  $\epsilon_{ij}$  is  
510 the random error for subject  $i$  and SNP  $j$  such that  $\epsilon_{ij} \sim \mathcal{N}(0, \sigma^2)$ .

511 To estimate each regression coefficient, we solved the least squares problem:

$$(\hat{\beta}_0, \hat{\beta}_{1j}) = \operatorname{argmin}_{\beta_0, \beta_{1j}} \sum_{i=1}^n (\bar{y}_i - (x_{ij} \cdot \beta_{1j} + \beta_0))^2 \quad (2)$$

512 using the function `lm` in R. With each estimate of the  $j$ -th SNP effect on the TCR feature of interest,  
513  $\hat{\beta}_{1j}$ , generated by fitting the least squares problem (**Equation 2**), we quantified the association  
514 strength between each SNP and the TCR feature of interest by testing whether  $\hat{\beta}_{1j} = 0$ . To do this,  
515 we calculate the test statistic:

$$T_j = \frac{\hat{\beta}_{1j}}{\operatorname{se}(\hat{\beta}_{1j})} \quad (3)$$

516 and compare  $T_j$  to a  $N(0, 1)$  distribution to obtain each P-value.

### 517 **Quantifying the association strength between each SNP and TCR feature, condi-** 518 **tional on *TCRB* gene type using the “gene-conditioned model”**

519 We noted that the amount of certain TCR features (such as the extent of all types of nucleotide  
520 trimming) vary by V(D)J *TCRB* gene choice. Thus, we can condition on this gene choice to quantify  
521 the direct association between each SNP and the amount of each TCR feature, without confounding  
522 gene choice effects. In this way, we condition on each gene type  $t \in \{\text{V-gene, J-gene, D-gene}\}$   
523 corresponding to the TCR feature of interest (i.e.  $t = \text{V-gene}$  for V-gene trimming,  $t = \text{J-gene}$  for  
524 J-gene trimming, etc.). We will refer to the following model as the “gene-conditioned model” in the  
525 main text. Many similarities exist between the “simple model” described in the previous section and  
526 this “gene-conditioned model.” Thus, we will focus on the differences between the two models here.  
527 We will describe both models with added correction for population-substructure-related effects, in  
528 the sections following.

529 As in the previous section, we, again, want to reduce the number of data observations. For  
530 each subject  $i \in \{1, \dots, I\}$ , we can calculate the average amount of each TCR feature  $\bar{y}_{im}$  by each  
531 candidate *TCRB* gene allele group  $m$  for the given gene type  $t$  such that  $m \in \{1, \dots, M_t\}$ . In calculating  
532 the average amount of each TCR feature across TCRs with the same candidate *TCRB* gene allele, we  
533 combined *TCRB* gene alleles which had identical CDR3 sequences and were of the same candidate  
534 *TCRB* gene into *TCRB* gene allele groups. As such, the number of observations per subject  $N_i$  in  
535 this condensed dataset will equal  $M_t$  and, thus, we will need to fit each model across  $\sum_{i=1}^I M_t$   
536 observations. In our data, for TCR $\beta$  chains, we observe 141 possible *TCRB* V-gene allele groups, 16  
537 J-gene allele groups, and 3 D-gene allele groups. Thus, using the extent of nucleotide trimming as  
538 an example TCR feature within the discovery cohort, with this condensed formulation, for each SNP  
539 and productivity status, we have  $\sim 56,000$  observations for V-gene trimming,  $\sim 6,000$  observations  
540 for J-gene trimming, and  $\sim 1,200$  observations for both types of D-gene trimming.

541 Using this condensed dataset, for each SNP, TCR feature, and productivity status, we fit the

542 following “gene-conditioned model”:

$$\bar{y}_{im} = x_{ij} \cdot \beta_{1j} + \beta_0 + \gamma_{jm} + \epsilon_{ijm} \quad (4)$$

543 where  $\gamma_{jm}$  represents the gene-effect on the amount of the TCR feature of interest for SNP  $j$  and  
544 gene-allele-group  $m$ , and  $\epsilon_{ijm}$  is the random error for subject  $i$ , SNP  $j$ , and gene-allele-group  $m$  such  
545 that  $\epsilon_{ijm} \sim \mathcal{N}(0, \sigma^2)$ . The variables  $x_{ij}$ ,  $\beta_{1j}$ , and  $\beta_0$  are defined as in the “simple model” description  
546 (**Equation 1**) in the previous section. However, since each subject had a different number of TCRs  
547 measured and varying *TCRB* gene usage, we calculated the proportion of TCRs from each candidate  
548 *TCRB* gene allele group,  $m$ , to define a weight,  $W_{im}$ , for each observation:

$$W_{im} = \frac{N_{im}}{\sum_{m=1}^{M_i} N_{im}}.$$

549 With this, we solved the following weighted least squares problem for each SNP, TCR feature, and  
550 productivity status combination:

$$(\hat{\beta}_0, \hat{\beta}_{1j}, \hat{\gamma}_j) = \underset{\beta_0, \beta_{1j}, \gamma_j}{\operatorname{argmin}} \sum_{i=1}^n \sum_{m=1}^{M_i} W_{im} \cdot (\bar{y}_{im} - (\beta_0 + \gamma_{jm} + \beta_{1j} x_{ij}))^2 \quad (5)$$

551 using the `lm` function in R.

552 With each estimate of the  $j$ -th SNP effect on the amount of the TCR feature of interest,  $\hat{\beta}_{1j}$ ,  
553 generated using the models described above, we quantified the association strength between  
554 each SNP and the amount of the TCR feature by testing whether  $\hat{\beta}_{1j} = 0$ . To do this, we applied a  
555 t-test (described in the previous section) using the test statistic (**Equation 3**) to obtain each P-value.  
556 However, because our condensed dataset contains a total of  $M_i$  observations from each subject  $i$ ,  
557 these P-values may be inflated due to intra-subject observations being potentially correlated. Thus,  
558 to increase the accuracy of the P-value calculation, for each association P-value below a certain  
559 threshold (we chose  $P < 5 \times 10^{-5}$ ), we recalculated the P-value using a clustered bootstrap (with  
560 subjects as the sampling unit). To do so, for each bootstrap iterate, we resampled subjects from the  
561 condensed dataset with replacement. Using this re-sampled data, we fit the model in **Equation 5** to  
562 estimate each coefficient. We repeated this bootstrap process 100 times and used the resulting 100  
563 coefficient estimates to estimate a standard error for each model coefficient. With this re-calculated  
564 standard error of the estimate of the  $j$ -th SNP effect on the amount of the TCR feature of interest,  
565  $se(\hat{\beta}_{1j})$ , we wanted to test whether  $\hat{\beta}_{1j} = 0$  by recalculating the test-statistic, **Equation 3**, and applying  
566 a t-test to obtain each “corrected” P-value. As noted in the multiple testing correction methods  
567 section, when accounting for multiple testing via Bonferroni correction, we used the entire number  
568 of TCR features and SNPs considered (not just those that were sufficiently promising to warrant  
569 use of the bootstrap to get a more accurate P-value): This ensures that our correction will not be  
570 anti-conservative.

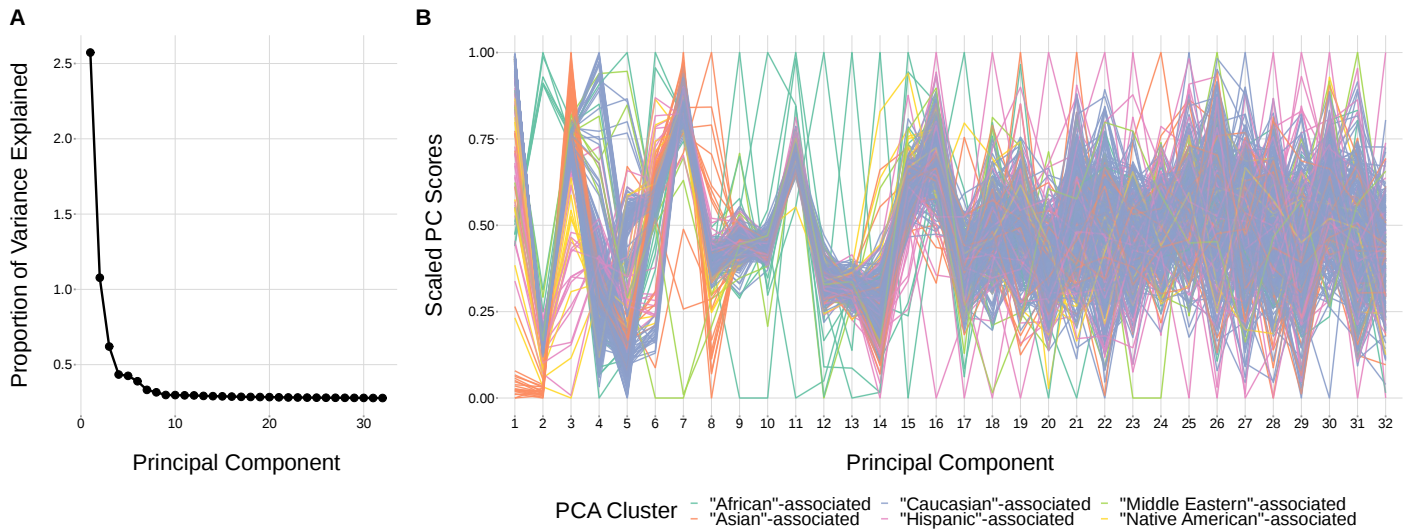

**Figure 9.** The top principal components calculated from genotype data reflect ancestry structure among samples. **(A)** The majority of the ancestry-informative principal component analysis variance is explained by the first 8 principal components. **(B)** The first 8 principal components show distinct separation by PCA cluster. Each colored line represents one of the 398 samples. The first 32 principal components are shown on the X-axis and their scaled component values for each subject on the Y-axis.

**Figure 9–source data 1.** Percent variance explained by each principal component.

**Figure 9–source data 2.** Scaled principal component values by subject.

## 571 Correcting for population-substructure-related effects

572 Structure within our SNP genotype data (such as population-substructure-related biases due to  
 573 ancestry), if present, may produce false positive associations when quantifying the association  
 574 strength between each SNP and our phenotype of interest. To account for this, we implemented  
 575 principal component analysis as commonly applied to genome-wide genotype data for population  
 576 substructure inference. Specifically, we used the PC-AiR algorithm (*Conomos et al., 2015*) which  
 577 identifies principal components that capture ancestry while accounting for relatedness in the sam-  
 578 ples. As such, the top principal components calculated from the genotype data reflect population  
 579 substructure among the samples. When plotting the proportion of variance explained by each PC,  
 580 we find that the majority of variability appears to be explained by the top eight PCs (*Figure 9*). This  
 581 conclusion is supported when plotting each PC score by ancestral group (*Figure 9*). With this, we  
 582 incorporated the top eight principal components as covariates into our GWAS models described  
 583 above.

584 As such, to quantify the association strength between each SNP and TCR feature without  
 585 conditioning on gene usage as in *Equation 1*, while incorporating principal component terms to  
 586 correct for population-substructure-related bias due to ancestry, we fit the model:

$$\bar{y}_i = x_{ij} \cdot \beta_{1j} + \beta_0 + \sum_{p=1}^8 \beta_{2jp} \cdot P_{ip} + \epsilon_{ij} \quad (6)$$

587 where  $\bar{y}_i$ ,  $x_{ij}$ ,  $\beta_{1j}$ ,  $\beta_0$ , and  $\epsilon_{ij}$  are defined as in *Equation 1*,  $\beta_{2jp}$  is the population-substructure-related  
 588 bias correction term for SNP  $j$  and the  $p$ -th principal component, and  $P_{ip}$  is the  $p$ -th principal



589 component for subject  $i$  as calculated above. To estimate each regression coefficient, we solved the  
590 following least squares problem for each SNP, TCR feature, and productivity status combination:

$$(\hat{\beta}_0, \hat{\beta}_{1j}, \vec{\beta}_{2j}) = \operatorname{argmin}_{\beta_0, \beta_{1j}, \vec{\beta}_{2j}} \sum_{i=1}^n (\bar{y}_i - (x_{ij} \cdot \beta_{1j} + \beta_0 + \sum_{p=1}^8 \beta_{2jp} \cdot P_{ip}))^2.$$

591 Furthermore, to quantify the association strength between each SNP and TCR feature, condi-  
592 tional on gene usage as in **Equation 4**, while incorporating principal component terms to correct  
593 for population-substructure-related bias due to ancestry, we fit the model:

$$\bar{y}_{im} = x_{ij} \cdot \beta_{1j} + \beta_0 + \gamma_{jm} + \sum_{p=1}^8 \beta_{2jp} \cdot P_{ip} + \epsilon_{ijm} \quad (7)$$

594 where  $\bar{y}_{im}$ ,  $x_{ij}$ ,  $\beta_{1j}$ ,  $\beta_0$ ,  $\gamma_{jm}$ , and  $\epsilon_{ij}$  are defined as in **Equation 4** and  $\beta_{2jp}$  and  $P_{ip}$  are defined as in  
595 **Equation 6**. Again, to estimate each regression coefficient, we solved the following weighted least  
596 squares problem for each SNP, TCR feature, and productivity status combination:

$$(\hat{\beta}_0, \hat{\beta}_{1j}, \hat{\gamma}_j, \vec{\beta}_{2j}) = \operatorname{argmin}_{\beta_0, \beta_{1j}, \gamma_j, \vec{\beta}_{2j}} \sum_{i=1}^n \sum_{m=1}^{M_i} W_{im} \cdot (\bar{y}_{im} - (\beta_0 + \gamma_{jm} + \beta_{1j} x_{ij} + \sum_{p=1}^8 \beta_{2jp} \cdot P_{ip}))^2.$$

597 With these estimates for the population-substructure-corrected  $j$ -th SNP effect on the amount of  
598 the TCR feature of interest,  $\hat{\beta}_{1j}$ , we calculated a P-value using the methods described in the methods  
599 section for each model type.

### 600 **Correcting for *TRBD2* allele genotype, SNP genotype linkage when quantifying SNP, 601 TCR feature associations within the *TCRB* locus**

602 Within the *TCRB* locus, we noted that SNP genotypes were associated with *TRBD2* allele genotype  
603 (**Figure 3–Figure Supplement 1**). Associations between gene-alleles and *TCRB* locus SNP genotypes,  
604 if present, may produce false positive associations when implementing the “gene-conditioned  
605 model” to infer associations between SNPs and TCR repertoire features, conditional on gene  
606 usage. To explore this phenomenon further, we zoomed in to the *TCRB* locus and incorporated a  
607 *TRBD2* allele genotype correction procedure into our model formulation. As such, to quantify the  
608 association strength between each *TCRB* locus SNP and TCR feature, conditional on gene usage and  
609 correcting for population-substructure-related effects as in **Equation 7**, while incorporating *TRBD2*  
610 allele genotype correction terms, we fit the model:

$$\bar{y}_{im} = z_i \cdot \alpha_j + x_{ij} \cdot \beta_{1j} + \beta_0 + \gamma_{jm} + \sum_{p=1}^8 \beta_{2jp} \cdot P_{ip} + \epsilon_{ijm}$$

611 where  $z_i$  represents the qualitative *TRBD2* allele genotype status for subject  $i$  such that  $z_i \in$   
612 {“*TRBD2*\*01 homozygous”, “heterozygous”, “*TRBD2*\*02 homozygous”},  $\alpha_j$  is the *TRBD2* allele geno-  
613 type effect for SNP  $j$ , and the remaining variables are defined as in **Equation 7**. With this model  
614 formulation, we can estimate each regression coefficient by solving the following weighted least



615 squares problem for each *TCRB* SNP, TCR feature, and productivity status combination:

$$(\hat{\alpha}_j, \hat{\beta}_0, \hat{\beta}_{1j}, \hat{\gamma}_j, \vec{\hat{\beta}}_{2j}) = \underset{\alpha_j, \beta_0, \beta_{1j}, \gamma_j, \vec{\beta}_{2j}}{\operatorname{argmin}} \sum_{i=1}^n \sum_{m=1}^{M_i} W_{im} \cdot (\bar{y}_{im} - (\alpha_j z_i + \beta_0 + \gamma_{jm} + \beta_{1j} x_{ij} + \sum_{p=1}^8 \beta_{2jp} \cdot P_{ip}))^2.$$

616 With these estimates for the *TRBD2* allele genotype and population-substructure-corrected *j*-th  
617 SNP effect on the amount of the TCR feature of interest,  $\hat{\beta}_{1j}$ , we calculated a P-value using the  
618 methods described in the methods section for the “gene-conditioned model”.

### 619 **Multiple testing correction for associations**

620 For each TCR feature (i.e. extent of trimming, number of N-insertions, etc.), we considered the  
621 significance of associations using a Bonferroni-corrected threshold. To establish each threshold,  
622 we corrected for each TCR feature subtype (i.e. V-gene trimming, J-gene trimming, etc. for the TCR  
623 trimming feature), the two TCR productivity types (productive and non-productive), and the total  
624 number of SNPs tested. When considering associations in the whole-genome context, we corrected  
625 for the approximately 6.5 million SNPs (remaining after filtering). When considering associations in  
626 a gene-level context, we corrected for the number of SNPs within 200 kb of the gene of interest. For  
627 the validation analysis, we considered associations in a SNP-level context and did not correct for  
628 multiple SNPs. However, for the validation analysis, we considered the significance of associations  
629 within both *TCRα* and *TCRβ* chains and, thus, corrected the significance threshold accordingly.

### 630 **Genomic inflation factor calculations**

631 We defined the genomic inflation factor  $\lambda$  to be the ratio of the median of the empirically observed  
632 squared test statistic to the expected median (*Devlin and Roeder, 1999; Freedman et al., 2004;*  
633 *Price et al., 2010*). For each GWAS analysis implemented using the “simple model”, we used the  
634 test statistic  $T_j$  given by *Equation 3* for each SNP  $j = \{1 \dots J\}$  tested genome-wide. For each GWAS  
635 analysis implemented using the “gene-conditioned model”, it was not computational feasible to  
636 calculate a test statistic  $T_j$  for all SNPs tested genome-wide using the bootstrapping protocol  
637 described in the “gene-conditioned model” methods section. Thus, instead, we randomly sampled  
638 10,000 SNPs and calculated the test statistic  $T_j$  for each SNP in the random subset. Let  $S =$   
639  $\{T_1^2, \dots, T_J^2\}$  be the set of all squared test statistics. As such,

$$\lambda = \frac{\operatorname{median}(S)}{0.456}$$

640 where 0.456 is the median of a chi-squared distribution with one degree of freedom. If the GWAS  
641 analysis results follow the chi-squared distribution, the expected value of  $\lambda$  is 1. Thus, when  $\lambda < 1.03$ ,  
642 we concluded that there was no evidence of systemic population-substructure-related bias in the  
643 analysis (*Price et al., 2010; Conomos et al., 2016*).

644 **Conditional analysis to test for multiple independent association signals**

645 Within the *DNTT* and *DCLRE1C* loci, we performed a stepwise series of nested regression analyses to  
646 test for independent SNP associations within each locus for N-insertion and nucleotide trimming,  
647 respectively. We used the same models and covariates as the primary analyses (“simple model”  
648 for associations between N-insertion and *DNTT* variation and the “gene-conditioned model” for  
649 associations between nucleotide trimming and *DCLRE1C* variation) and included the most significant  
650 SNP within each locus as an additional covariate. We inferred the association between each SNP  
651 within each locus and the TCR feature of interest using this new conditional model and considered  
652 significant associations at a gene-level Bonferroni-corrected significance threshold for each locus.  
653 From here, we repeated this analysis (if necessary), identifying and adding additional SNPs one-by-  
654 one as a covariate to each successive model. Once the P-value of top SNP within the locus was no  
655 longer significant, we concluded the analysis. SNPs which were added as additional covariates in  
656 the final conditional model were considered to be independent signals.

657 **Ancestry-informative PCA cluster classification**

658 In order to correct for population-substructure-related biases due to ancestry in our GWAS analyses,  
659 we used ancestry-informative principal component analysis. The original genotyping dataset (*Mar-*  
660 *tin et al., 2020*) contained self-reported ancestry. However, a number of subjects did not self-report  
661 ancestry in the original data collection. Further, for some subjects, their self-reported ancestry was  
662 discordant with clusters observed in a principal component analysis. Therefore, for analysis pur-  
663 poses, we used the minimum covariance determinant method (*Rousseeuw and Van Driessen, 1999*;  
664 *Conomos et al., 2016*) with the original self-identified labels to group the subjects into six ancestry-  
665 informative PCA clusters: “African”-associated (8), “Asian”-associated (23), “Caucasian”-associated  
666 (322), “Hispanic”-associated (30), “Middle Eastern”-associated (5), and “Native American”-associated  
667 (10).

668 **Quantifying associations between *TRBD2* allele genotype and SNP genotype within  
669 the *TCRB* locus**

670 For each significantly associated SNP within the *TCRB* locus as shown in *Figure 3*, we compared SNP  
671 genotype to *TRBD2* allele genotype across all subjects. We used Pearson correlation to measure the  
672 correlation between the two genotypes.

673 **Quantifying TCR repertoire feature and SNP minor allele frequency variations by  
674 ancestry-informative PCA cluster**

675 To quantify PCA cluster variation of TCR repertoire features (such as total N-insertions (V-D N-  
676 insertion and D-J N-insertion)), we first calculated an average of each TCR repertoire feature by  
677 subject and productivity status. We also calculated a population mean of each TCR repertoire

678 feature by productivity status. Each subject was classified into one of six PCA clusters. Thus, we  
679 compared the mean of the TCR repertoire features within each PCA cluster to the population mean  
680 using a one-sample t-test to compute each P-value. We used Bonferroni multiple testing correction  
681 to adjust each P-value.

682 We also calculated SNP minor allele frequencies for the whole population and for each PCA  
683 cluster individually such that

$$\text{MAF}_{jr} = \frac{\sum_{i=1}^{I_r} x_{ij}}{2 * I_r}. \quad (8)$$

684 Here,  $\text{MAF}_{jr}$  is the minor allele frequency for SNP marker  $j$  and PCA cluster  $r$ ,  $I_r$  is the number of  
685 individuals in the PCA cluster  $r$ , and  $x_{ij}$  is the number of alleles in the genotype of SNP marker  
686  $j$  for subject  $i \in \{1, \dots, I_r\}$ . For each SNP  $j$ , the minor allele was defined as the allele with the  
687 lowest frequency in the total population. To quantify minor allele frequency differences by PCA  
688 cluster for select SNPs within various loci of interest (i.e. *DNTT* gene), we compared the minor allele  
689 frequencies calculated within PCA-clusters to the minor allele frequencies calculated for the entire  
690 population using a one-sample t-test to compute each P-value. Again, we used Bonferroni multiple  
691 testing correction to adjust each P-value.

692 For both of these analyses, we used the `t_test` function from the `rstatix` package in R.

## 693 **Implementation and code**

694 R code implementing the genome-wide association inferences described here is available at <https://github.com/phbradley/tcr-gwas>. The following tools were especially helpful:

- 696 • `data.table` (*Dowle and Srinivasan, 2021*)
- 697 • `tidyverse` (*Wickham et al., 2019*)
- 698 • `doParallel` (*Corporation and Weston, 2020*)
- 699 • `SNPRelate` (*Zheng et al., 2012*)
- 700 • `GWASTools` (*Gogarten et al., 2012*)
- 701 • `GENESIS` (*Gogarten et al., 2019*)
- 702 • `cowplot` (*Wilke, 2020*)

## 703 **Acknowledgments**

704 The authors thank Christopher Carlson, William DeWitt, and Michael Lieber for helpful discussions  
705 regarding this paper.

## 706 **Additional Information**

### 707 **Competing interests**

708 Paul G Thomas consults for Johnson and Johnson, Immunoscapes, Cytoagents, and PACT Pharma. He  
709 has received travel reimbursement from 10X Genomics and Illumina. He has patents on methods

710 related to T cell receptor biology. The other authors declare that no competing interests exist.

711 **Funding**

| <b>Funder</b>                                                                                                           | <b>Grant reference number</b> | <b>Author</b>                                                                                                |
|-------------------------------------------------------------------------------------------------------------------------|-------------------------------|--------------------------------------------------------------------------------------------------------------|
| National Institutes of Health                                                                                           | R01 AI146028                  | Magdalena L Russell<br>Frederick A Matsen IV<br>Noah Simon<br>Philip Bradley                                 |
| The Simons Foundation and Howard Hughes Medical Institute                                                               | 55108544                      | Frederick A Matsen IV                                                                                        |
| National Institutes of Health                                                                                           | R01 AI136514                  | Aisha Souquette<br>E Kaitlynn Allen<br>Paul G Thomas<br>Philip Bradley                                       |
| National Institutes of Health                                                                                           | R01 AI120997                  | Guillermina Kuan<br>Angel Balmaseda<br>Aubree Gordon                                                         |
| National Institutes of Health                                                                                           | R01 AI107625                  | Aisha Souquette<br>E Kaitlynn Allen<br>Paul G Thomas                                                         |
| National Institute of Allergy and Infectious Diseases via Centers of Excellence for Influenza Research and Surveillance | HHSN272201 400006C            | Aisha Souquette<br>E Kaitlynn Allen<br>Guillermina Kuan<br>Angel Balmaseda<br>Aubree Gordon<br>Paul G Thomas |
| National Institute of Allergy and Infectious Diseases via Centers of Excellence for Influenza Research and Response     | 75N93021C00016                | Aisha Souquette<br>E Kaitlynn Allen<br>Guillermina Kuan<br>Angel Balmaseda<br>Aubree Gordon<br>Paul G Thomas |
| National Institute of Allergy and Infectious Diseases                                                                   | AI33484                       | David M Levine                                                                                               |
| National Institute of Allergy and Infectious Diseases                                                                   | AI149213                      | David M Levine                                                                                               |
| National Cancer Institute                                                                                               | CA015704                      | David M Levine                                                                                               |
| National Heart, Lung, and Blood Institute                                                                               | HL087690                      | David M Levine                                                                                               |
| National Heart, Lung, and Blood Institute                                                                               | HL088201                      | David M Levine                                                                                               |
| National Heart, Lung, and Blood Institute                                                                               | HL094260                      | David M Levine                                                                                               |
| National Heart, Lung, and Blood Institute                                                                               | HL105914                      | David M Levine                                                                                               |
| National Heart, Lung, and Blood Institute                                                                               | K23HL69860                    | David M Levine                                                                                               |
| National Institutes of Health                                                                                           | ORIP S10OD028685              | Scientific Computing Infrastructure at Fred Hutch                                                            |

712 **Additional Files**

713 **Data availability**

714 Data required to reproduce the findings reported here and a table mapping subject identifiers  
715 between the TCR repertoire and SNP data for the discovery cohort will be deposited in the Zenodo  
716 database prior to publication.

717 The following new dataset was generated:

| <b>Author</b>                                                                                      | <b>Year</b> | <b>Dataset title</b>                  | <b>Dataset URL</b>                                                                                                    | <b>Database, license, and accessibility information</b>                       |
|----------------------------------------------------------------------------------------------------|-------------|---------------------------------------|-----------------------------------------------------------------------------------------------------------------------|-------------------------------------------------------------------------------|
| Aisha Souquette, E Kaitlynn Allen, Guillermina Kuan, Angel Balmaseda, Aubree Gordon, Paul G Thomas | 2021        | The Nicaraguan Influenza Cohort Study | <a href="https://www.ncbi.nlm.nih.gov/bioproject/PRJNA762269">https://www.ncbi.nlm.nih.gov/bioproject/PRJNA762269</a> | Publicly available in The BioProject database (accession number: PRJNA762269) |

718 The following previously published datasets were used:

| <b>Author</b>                                                                                                                      | <b>Year</b> | <b>Dataset title</b>                                                                                                         | <b>Dataset URL</b>                                                                                                                                                                      | <b>Database, license, and accessibility information</b>                                      |
|------------------------------------------------------------------------------------------------------------------------------------|-------------|------------------------------------------------------------------------------------------------------------------------------|-----------------------------------------------------------------------------------------------------------------------------------------------------------------------------------------|----------------------------------------------------------------------------------------------|
| Emerson RO, DeWitt WS, Vignali M, Gravley J, Hu JK, Osborne EJ, Desmarais C, Klinger M, Carlson CS, Hansen JA, Rieder M, Robins HS | 2017        | Immunosequencing identifies signatures of cytomegalovirus exposure history and HLA mediated effects on the T cell repertoire | <a href="https://doi.org/10.21417/B7001Z">https://doi.org/10.21417/B7001Z</a>                                                                                                           | Publicly available in ImmuneACCESS database                                                  |
| Martin PJ, Levine DM, Storer BE, Nelson SC, Dong X, Hansen JA                                                                      | 2020        | Recipient and donor genetic variants associated with mortality after allogeneic hematopoietic cell transplantation           | <a href="https://www.ncbi.nlm.nih.gov/projects/gap/cgi-bin/study.cgi?study_id=phs001918.v1.p1">https://www.ncbi.nlm.nih.gov/projects/gap/cgi-bin/study.cgi?study_id=phs001918.v1.p1</a> | Publicly available in The database of Genotypes and Phenotypes (accession number: phs001918) |

719 **References**

720 **Conomos MP**, Laurie CA, Stilp AM, Gogarten SM, McHugh CP, Nelson SC, Sofer T, Fernández-Rhodes L, Justice  
721 AE, Graff M, Young KL, Seyerle AA, Avery CL, Taylor KD, Rotter JJ, Talavera GA, Daviglus ML, Wassertheil-  
722 Smoller S, Schneiderman N, Heiss G, et al. Genetic Diversity and Association Studies in US Hispanic/Latino  
723 Populations: Applications in the Hispanic Community Health Study/Study of Latinos. *Am J Hum Genet.* 2016  
724 Jan; 98(1):165–184.

- 725 **Conomos MP**, Miller MB, Thornton TA. Robust inference of population structure for ancestry prediction and  
726 correction of stratification in the presence of relatedness. *Genet Epidemiol*. 2015 May; 39(4):276–293.
- 727 **Corporation M**, Weston S. doParallel: Foreach Parallel Adaptor for the 'parallel' Package; 2020, [https://CRAN.](https://CRAN.R-project.org/package=doParallel)  
728 [R-project.org/package=doParallel](https://CRAN.R-project.org/package=doParallel), r package version 1.0.16.
- 729 **Dash P**, Fiore-Gartland AJ, Hertz T, Wang GC, Sharma S, Souquette A, Crawford JC, Clemens EB, Nguyen THO,  
730 Kedzierska K, La Gruta NL, Bradley P, Thomas PG. Quantifiable predictive features define epitope-specific T  
731 cell receptor repertoires. *Nature*. 2017 Jul; 547(7661):89–93.
- 732 **Devlin B**, Roeder K. Genomic control for association studies. *Biometrics*. 1999 Dec; 55(4):997–1004.
- 733 **DeWitt WS 3rd**, Smith A, Schoch G, Hansen JA, Matsen FA 4th, Bradley P. Human T cell receptor occurrence  
734 patterns encode immune history, genetic background, and receptor specificity. *Elife*. 2018 Aug; 7.
- 735 **Dowle M**, Srinivasan A. data.table: Extension of 'data.frame'; 2021, [https://CRAN.R-project.org/package=data.](https://CRAN.R-project.org/package=data.table)  
736 [table](https://CRAN.R-project.org/package=data.table), r package version 1.14.0.
- 737 **Egorov ES**, Merzlyak EM, Shelenkov AA, Britanova OV, Sharonov GV, Staroverov DB, Bolotin DA, Davydov AN,  
738 Barsova E, Lebedev YB, Shugay M, Chudakov DM. Quantitative profiling of immune repertoires for minor  
739 lymphocyte counts using unique molecular identifiers. *J Immunol*. 2015 Jun; 194(12):6155–6163.
- 740 **Emerson RO**, DeWitt WS, Vignali M, Gravley J, Hu JK, Osborne EJ, Desmarais C, Klinger M, Carlson CS, Hansen  
741 JA, Rieder M, Robins HS. Immunosequencing identifies signatures of cytomegalovirus exposure history and  
742 HLA-mediated effects on the T cell repertoire. *Nat Genet*. 2017 May; 49(5):659–665.
- 743 **Feeney AJ**, Victor KD, Vu K, Nadel B, Chukwuocha RU. Influence of the V(D)J recombination mechanism on the  
744 formation of the primary T and B cell repertoires. *Semin Immunol*. 1994 Jun; 6(3):155–163.
- 745 **Fischer S**, Stanke F, Tümmler B. VJ Segment Usage of TCR-Beta Repertoire in Monozygotic Cystic Fibrosis Twins.  
746 *Front Immunol*. 2021 Feb; 12:599133.
- 747 **Freedman ML**, Reich D, Penney KL, McDonald GJ, Mignault AA, Patterson N, Gabriel SB, Topol EJ, Smoller JW, Pato  
748 CN, Pato MT, Petryshen TL, Kolonel LN, Lander ES, Sklar P, Henderson B, Hirschhorn JN, Altshuler D. Assessing  
749 the impact of population stratification on genetic association studies. *Nat Genet*. 2004 Apr; 36(4):388–393.
- 750 **Fugmann SD**, Lee AI, Shockett PE, Villey IJ, Schatz DG. The RAG proteins and V(D)J recombination: complexes,  
751 ends, and transposition. *Annu Rev Immunol*. 2000; 18(1):495–527.
- 752 **Gao K**, Chen L, Zhang Y, Zhao Y, Wan Z, Wu J, Lin L, Kuang Y, Lu J, Zhang X, Tian L, Liu X, Qiu X. Germline-encoded  
753 TCR-MHC contacts promote TCR V gene bias in umbilical cord blood T cell repertoire. *Front Immunol*. 2019  
754 Aug; 10:2064.
- 755 **Gauss GH**, Lieber MR. Mechanistic constraints on diversity in human V(D)J recombination. *Mol Cell Biol*. 1996  
756 Jan; 16(1):258–269.
- 757 **Gellert M**. DNA double-strand breaks and hairpins in V(D)J recombination. *Semin Immunol*. 1994 Jun; 6(3):125–  
758 130.
- 759 **Gilfillan S**, Dierich A, Lemeur M, Benoist C, Mathis D. Mice lacking TdT: mature animals with an immature  
760 lymphocyte repertoire. *Science*. 1993 Aug; 261(5125):1175–1178.

- 761 **Giudicelli V**, Chaume D, Lefranc MP. IMGT/GENE-DB: a comprehensive database for human and mouse  
762 immunoglobulin and T cell receptor genes. *Nucleic Acids Res.* 2005 Jan; 33(Database issue):D256–61.
- 763 **Gogarten SM**, Bhangale T, Conomos MP, Laurie CA, McHugh CP, Painter I, Zheng X, Crosslin DR, Levine D, Lumley  
764 T, Nelson SC, Rice K, Shen J, Swarnkar R, Weir BS, Laurie CC. GWASTools: an R/Bioconductor package for  
765 quality control and analysis of genome-wide association studies. *Bioinformatics.* 2012; 28(24):3329–3331. doi:  
766 10.1093/bioinformatics/bts610.
- 767 **Gogarten SM**, Sofer T, Chen H, Yu C, Brody JA, Thornton TA, Rice KM, Conomos MP. Genetic association testing  
768 using the GENESIS R/Bioconductor package. *Bioinformatics.* 2019; doi: 10.1093/bioinformatics/btz567.
- 769 **Goldrath AW**, Bevan MJ. Selecting and maintaining a diverse T-cell repertoire. *Nature.* 1999 Nov; 402(6759):255–  
770 262.
- 771 **Gu J**, Li S, Zhang X, Wang LC, Niewolik D, Schwarz K, Legerski RJ, Zandi E, Lieber MR. DNA-PKcs regulates a  
772 single-stranded DNA endonuclease activity of Artemis. *DNA Repair (Amst).* 2010 Apr; 9(4):429–437.
- 773 **Jackson KJL**, Gaeta B, Sewell W, Collins AM. Exonuclease activity and P nucleotide addition in the generation of  
774 the expressed immunoglobulin repertoire. *BMC Immunol.* 2004 Sep; 5:19.
- 775 **Kallenbach S**, Doyen N, Fanton d'Andon M, Rougeon F. Three lymphoid-specific factors account for all junctional  
776 diversity characteristic of somatic assembly of T-cell receptor and immunoglobulin genes. *Proc Natl Acad Sci*  
777 *U S A.* 1992 Apr; 89(7):2799–2803.
- 778 **Komori T**, Okada A, Stewart V, Alt FW. Lack of N regions in antigen receptor variable region genes of TdT-deficient  
779 lymphocytes. *Science.* 1993 Aug; 261(5125):1171–1175.
- 780 **Krishna C**, Chowell D, Gönen M, Elhanati Y, Chan TA. Genetic and environmental determinants of human TCR  
781 repertoire diversity. *Immun Ageing.* 2020 Dec; 17(1).
- 782 **Li S**, Chang HH, Niewolik D, Hedrick MP, Pinkerton AB, Hassig CA, Schwarz K, Lieber MR. Evidence that the DNA  
783 endonuclease ARTEMIS also has intrinsic 5'-exonuclease activity. *J Biol Chem.* 2014 Mar; 289(11):7825–7834.
- 784 **Lu H**, Schwarz K, Lieber MR. Extent to which hairpin opening by the Artemis:DNA-PKcs complex can contribute  
785 to junctional diversity in V(D)J recombination. *Nucleic Acids Res.* 2007 Oct; 35(20):6917–6923.
- 786 **Ma Y**, Pannicke U, Schwarz K, Lieber MR. Hairpin opening and overhang processing by an Artemis/DNA-  
787 dependent protein kinase complex in nonhomologous end joining and V(D)J recombination. *Cell.* 2002 Mar;  
788 108(6):781–794.
- 789 **Martin PJ**, Levine DM, Storer BE, Nelson SC, Dong X, Hansen JA. Recipient and donor genetic variants associated  
790 with mortality after allogeneic hematopoietic cell transplantation. *Blood Adv.* 2020 Jul; 4(14):3224–3233.
- 791 **Mikocziova I**, Greiff V, Sollid LM. Immunoglobulin germline gene variation and its impact on human disease.  
792 *Genes Immun.* 2021 Jun; p. 1–13.
- 793 **Moshous D**, Callebaut I, de Chasseval R, Corneo B, Cavazzana-Calvo M, Le Deist F, Tezcan I, Sanal O, Bertrand Y,  
794 Philippe N, Fischer A, de Villartay JP. Artemis, a novel DNA double-strand break repair/V(D)J recombination  
795 protein, is mutated in human severe combined immune deficiency. *Cell.* 2001 Apr; 105(2):177–186.
- 796 **Murphy K**, Weaver C. *Janeway's Immunobiology.* Garland Science; 2016.



- 797 **Murugan A**, Mora T, Walczak AM, Callan CG Jr. Statistical inference of the generation probability of T-cell  
798 receptors from sequence repertoires. *Proc Natl Acad Sci U S A*. 2012 Oct; 109(40):16161–16166.
- 799 **Nadel B**, Feeney AJ. Influence of coding-end sequence on coding-end processing in V(D)J recombination. *J*  
800 *Immunol*. 1995 Nov; 155(9):4322–4329.
- 801 **Nadel B**, Feeney AJ. Nucleotide deletion and P addition in V(D)J recombination: a determinant role of the  
802 coding-end sequence. *Mol Cell Biol*. 1997 Jul; 17(7):3768–3778.
- 803 **Ng S**, Lopez R, Kuan G, Gresh L, Balmaseda A, Harris E, Gordon A. The timeline of influenza virus shedding in  
804 children and adults in a household transmission study of influenza in Managua, Nicaragua. *Pediatr Infect Dis*  
805 *J*. 2016; .
- 806 **Oltz EM**. Regulation of antigen receptor gene assembly in lymphocytes. *Immunol Res*. 2001; 23(2-3):121–133.
- 807 **Pogorelyy MV**, Minervina AA, Touzel MP, Sycheva AL, Komech EA, Kovalenko EI, Karganova GG, Egorov ES,  
808 Komkov AY, Chudakov DM, Mamedov IZ, Mora T, Walczak AM, Lebedev YB. Precise tracking of vaccine-  
809 responding T cell clones reveals convergent and personalized response in identical twins. *Proc Natl Acad Sci*  
810 *U S A*. 2018 Dec; 115(50):12704–12709.
- 811 **Price AL**, Zaitlen NA, Reich D, Patterson N. New approaches to population stratification in genome-wide  
812 association studies. *Nat Rev Genet*. 2010 Jul; 11(7):459–463.
- 813 **Qi Q**, Cavanagh MM, Le Saux S, NamKoong H, Kim C, Turgano E, Liu Y, Wang C, Mackey S, Swan GE, Dekker CL,  
814 Olshen RA, Boyd SD, Weyand CM, Tian L, Goronzy JJ. Diversification of the antigen-specific T cell receptor  
815 repertoire after varicella zoster vaccination. *Sci Transl Med*. 2016 Mar; 8(332):332ra46.
- 816 **Robins HS**, Srivastava SK, Campregher PV, Turtle CJ, Andriesen J, Riddell SR, Carlson CS, Warren EH. Overlap and  
817 effective size of the human CD8+ T cell receptor repertoire. *Sci Transl Med*. 2010 Sep; 2(47):47ra64.
- 818 **Rousseuw PJ**, Van Driessen K. A Fast Algorithm for the Minimum Covariance Determinant Estimator. *Techno-*  
819 *metrics*. 1999 Aug; 41(3):212–223.
- 820 **Rubelt F**, Bolen CR, McGuire HM, Vander Heiden JA, Gadala-Maria D, Levin M, Euskirchen GM, Mamedov MR,  
821 Swan GE, Dekker CL, Cowell LG, Kleinstein SH, Davis MM. Individual heritable differences result in unique cell  
822 lymphocyte receptor repertoires of naïve and antigen-experienced cells; 2016.
- 823 **Schatz DG**, Swanson PC. V(D)J recombination: mechanisms of initiation. *Annu Rev Genet*. 2011 Aug; 45(1):167–  
824 202.
- 825 **Sharon E**, Sibener LV, Battle A, Fraser HB, Garcia KC, Pritchard JK. Genetic variation in MHC proteins is associated  
826 with T cell receptor expression biases. *Nat Genet*. 2016 Sep; 48(9):995–1002.
- 827 **Shugay M**, Britanova OV, Merzlyak EM, Turchaninova MA, Mamedov IZ, Tuganbaev TR, Bolotin DA, Staroverov  
828 DB, Putintseva EV, Plevova K, Linnemann C, Shagin D, Pospisilova S, Lukyanov S, Schumacher TN, Chudakov  
829 DM. Towards error-free profiling of immune repertoires. *Nat Methods*. 2014 Jun; 11(6):653–655.
- 830 **Srivastava SK**, Robins HS. Palindromic nucleotide analysis in human T cell receptor rearrangements. *PLoS One*.  
831 2012 Dec; 7(12):e52250.
- 832 **Tanno H**, Gould TM, McDaniel JR, Cao W, Tanno Y, Durrett RE, Park D, Cate SJ, Hildebrand WH, Dekker CL, Tian L,  
833 Weyand CM, Georgiou G, Goronzy JJ. Determinants governing T cell receptor  $\alpha/\beta$ -chain pairing in repertoire  
834 formation of identical twins. *Proc Natl Acad Sci U S A*. 2020 Jan; 117(1):532–540.

- 835 **Thomas PG**, Crawford JC. Selected before selection: A case for inherent antigen bias in the T cell receptor  
836 repertoire. *Curr Opin Syst Biol*. 2019 Dec; 18:36–43.
- 837 **Weigert M**, Gatmaitan L, Loh E, Schilling J, Hood L. Rearrangement of genetic information may produce  
838 immunoglobulin diversity. *Nature*. 1978; 276(5690):785–790.
- 839 **Wickham H**, Averick M, Bryan J, Chang W, McGowan LD, François R, Grolemond G, Hayes A, Henry L, Hester J,  
840 Kuhn M, Pedersen TL, Miller E, Bache SM, Müller K, Ooms J, Robinson D, Seidel DP, Spinu V, Takahashi K, et al.  
841 Welcome to the tidyverse. *Journal of Open Source Software*. 2019; 4(43):1686. doi: [10.21105/joss.01686](https://doi.org/10.21105/joss.01686).
- 842 **Wilke CO**. cowplot: Streamlined Plot Theme and Plot Annotations for 'ggplot2'; 2020, <https://CRAN.R-project.org/package=cowplot>, r package version 1.1.1.
- 844 **Witzgall R**, O'Leary E, Leaf A, Onaldi D, Bonventre JV. The Krüppel-associated box-A (KRAB-A) domain of zinc  
845 finger proteins mediates transcriptional repression. *Proc Natl Acad Sci U S A*. 1994 May; 91(10):4514–4518.
- 846 **Woodsworth DJ**, Castellarin M, Holt RA. Sequence analysis of T-cell repertoires in health and disease. *Genome*  
847 *Med*. 2013 Oct; 5(10):98.
- 848 **Zhao B**, Rothenberg E, Ramsden DA, Lieber MR. The molecular basis and disease relevance of non-homologous  
849 DNA end joining. *Nat Rev Mol Cell Biol*. 2020 Dec; 21(12):765–781.
- 850 **Zheng X**, Levine D, Shen J, Gogarten S, Laurie C, Weir B. A High-performance Computing Toolset for Relatedness  
851 and Principal Component Analysis of SNP Data. *Bioinformatics*. 2012; 28(24):3326–3328. doi: [10.1093/bioinformatics/bts606](https://doi.org/10.1093/bioinformatics/bts606).
- 853 **Zvyagin IV**, Pogorelyy MV, Ivanova ME, Komech EA, Shugay M, Bolotin DA, Shelenkov AA, Kurnosov AA, Staroverov  
854 DB, Chudakov DM, Lebedev YB, Mamedov IZ. Distinctive properties of identical twins' TCR repertoires revealed  
855 by high-throughput sequencing. *Proc Natl Acad Sci U S A*. 2014 Apr; 111(16):5980–5985.

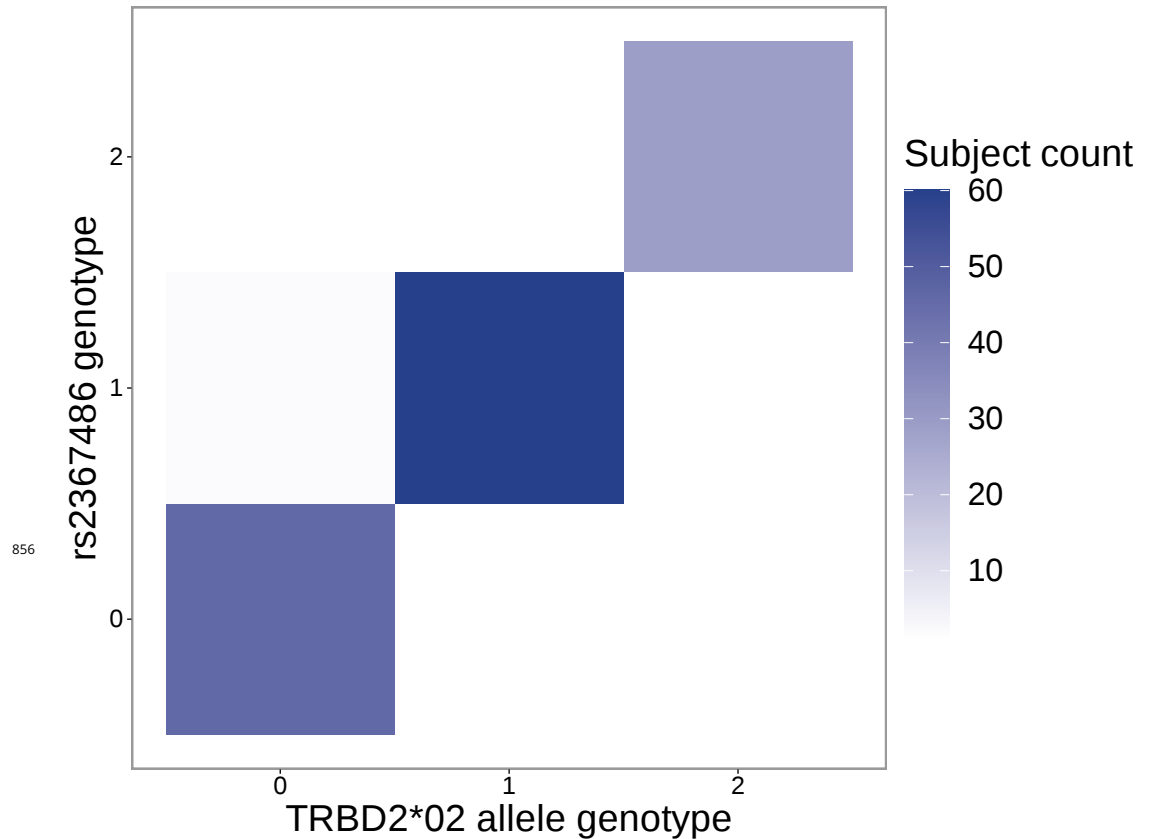

**Figure 3-Figure supplement 1.** The SNP genotype for the SNP (rs2367486) most significantly associated with 5' end D-gene trimming within the *TCRB* locus is also associated with *TRBD2\*02* allele genotype. Specifically, SNP genotype and *TRBD2\*02* allele genotype are significantly correlated ( $P < 2.2 \times 10^{-16}$  and  $\chi^2 = 259.3$ ) using a chi-square test of independence. The Y-axis integer genotypes correspond to the number of minor alleles within the rs2367486 SNP genotype. The X-axis integer genotypes correspond to the number of *TRBD2\*02* alleles within the *TRBD2* gene locus genotype.

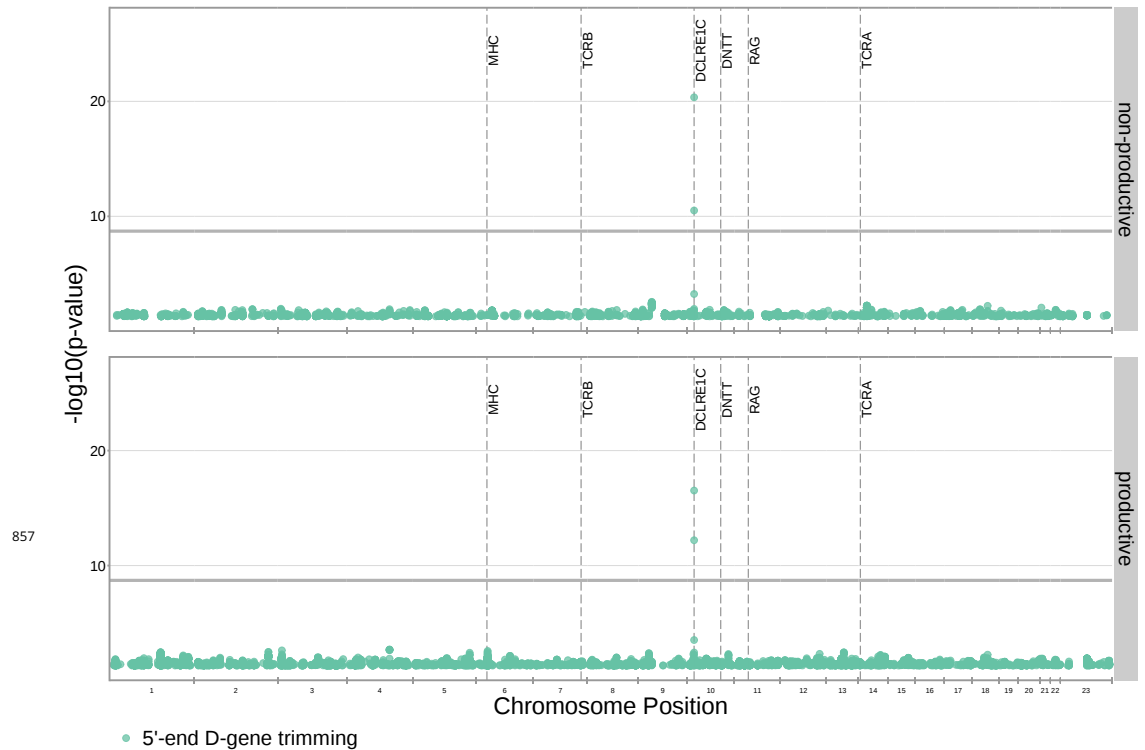

**Figure 3–Figure supplement 2.** Significant associations are no longer observed between 5' end D-gene trimming and variation in the *TCRB* locus after correcting for *TRBD2* allele genotype in our model formulation. Further, four new significant associations are present between 5' end D-gene trimming and variation in the *DCLRE1C* locus. Only SNP associations whose  $P < 5 \times 10^{-2}$  are shown here. All genome-wide 3' end D-gene trimming associations fell above this plotting threshold. The gray horizontal line corresponds to a P-value of  $1.94 \times 10^{-9}$  (calculated using whole-genome Bonferroni correction, see Methods).

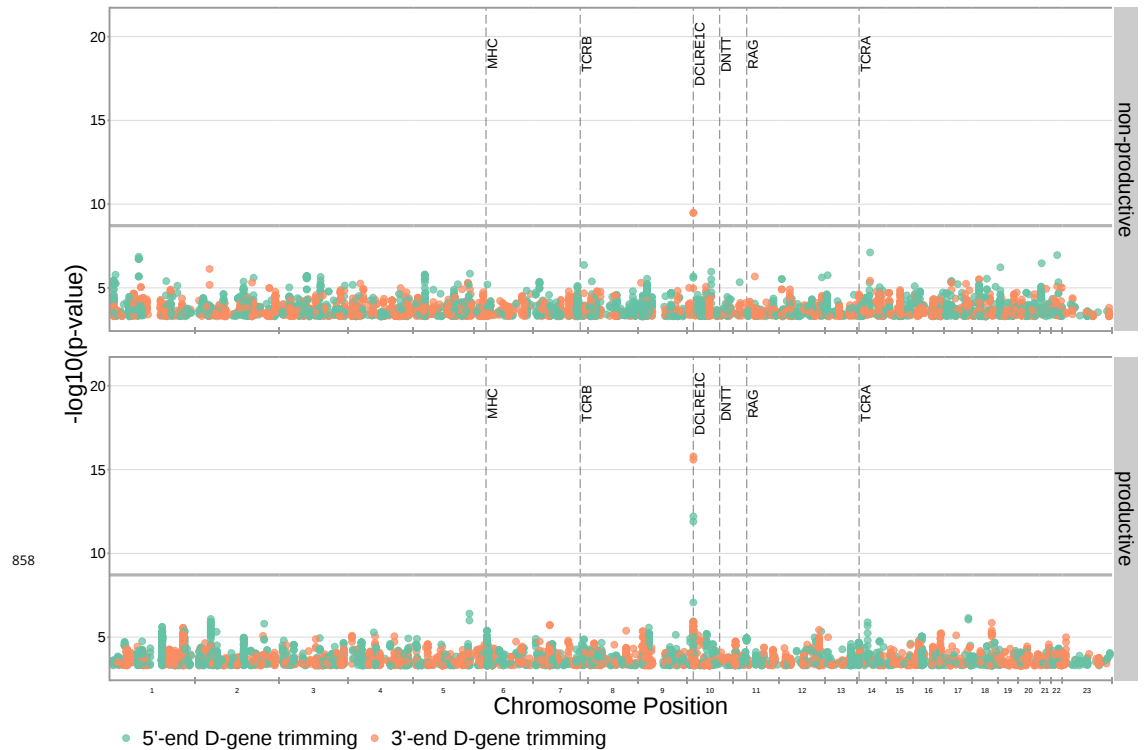

**Figure 3-Figure supplement 3.** Significant associations are also no longer observed between 5' end D-gene trimming and variation in the *TCRB* locus when restricting the analysis to TCRs which contain *TRBJ1* genes (and consequently contain *TRBD1*). Additionally, two new associations are present between 5' end D-gene trimming and variation in the *DCLRE1C* locus for productive TCRs. Four new associations are present between 3' end D-gene trimming and variation in the *DCLRE1C* locus. Only SNP associations whose  $P < 5 \times 10^{-4}$  are shown here. The gray horizontal line corresponds to a P-value of  $1.94 \times 10^{-9}$  (calculated using whole-genome Bonferroni correction, see Methods).

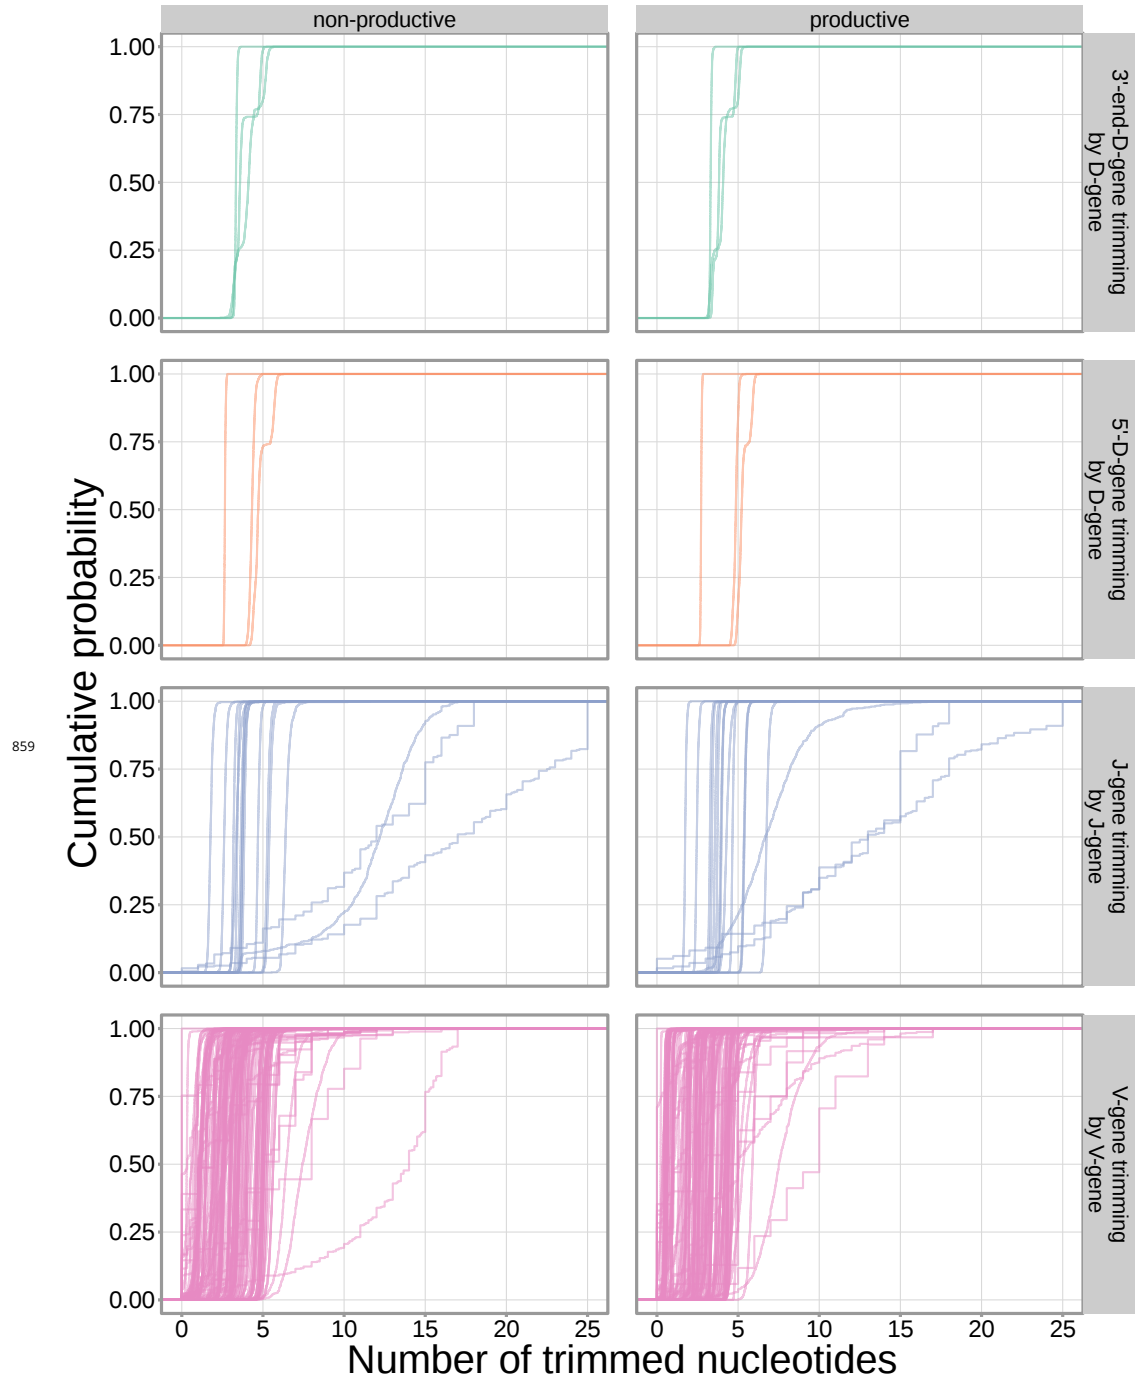

**Figure 3–Figure supplement 4.** The extent of nucleotide deletion varies by the gene allele identity for all gene types. An empirical cumulative distribution is drawn for each gene allele type within each indicated gene type (i.e. V-gene, D-gene, J-gene).

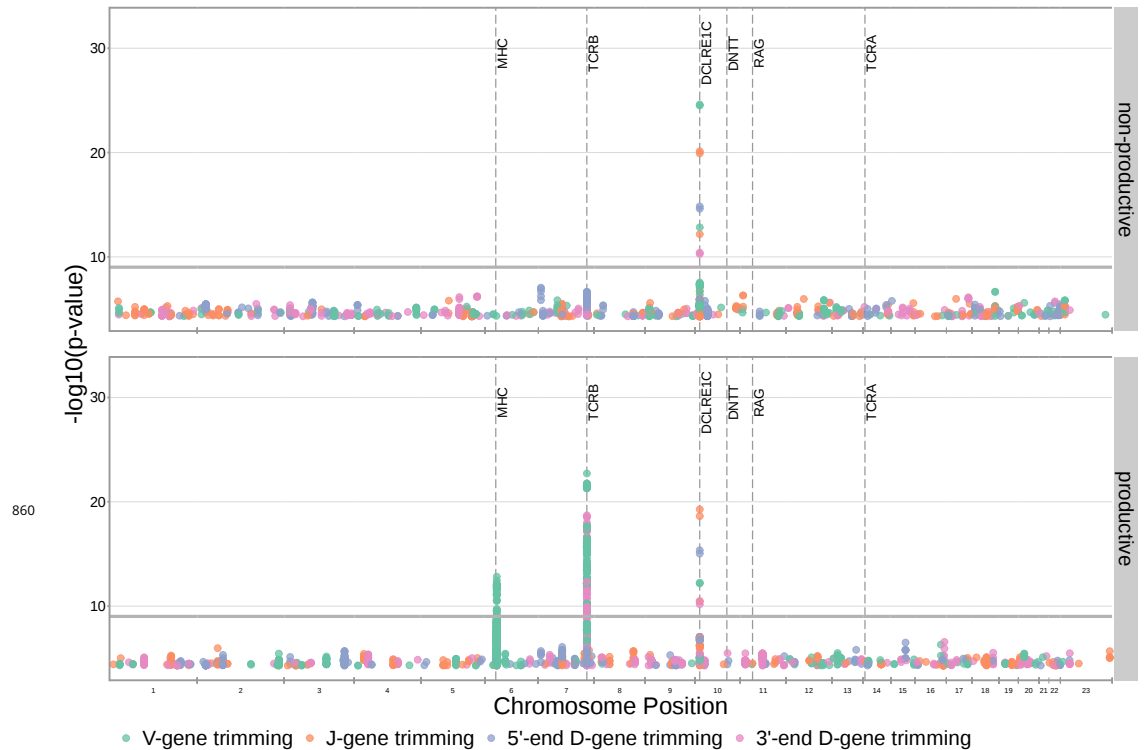

**Figure 3-Figure supplement 5.** Significant SNP associations are located within the MHC, *TCRB* and *DCLRE1C* loci for all four trimming types when calculating the strength of association without conditioning out effects mediated by gene choice. Earlier findings relating variations in MHC and *TCRB* to gene usage changes, however, indicate that many of these associations are likely artefactual. Only SNP associations whose  $P < 5 \times 10^{-5}$  are shown here. The gray horizontal line corresponds to a P-value of  $9.68 \times 10^{-10}$ .



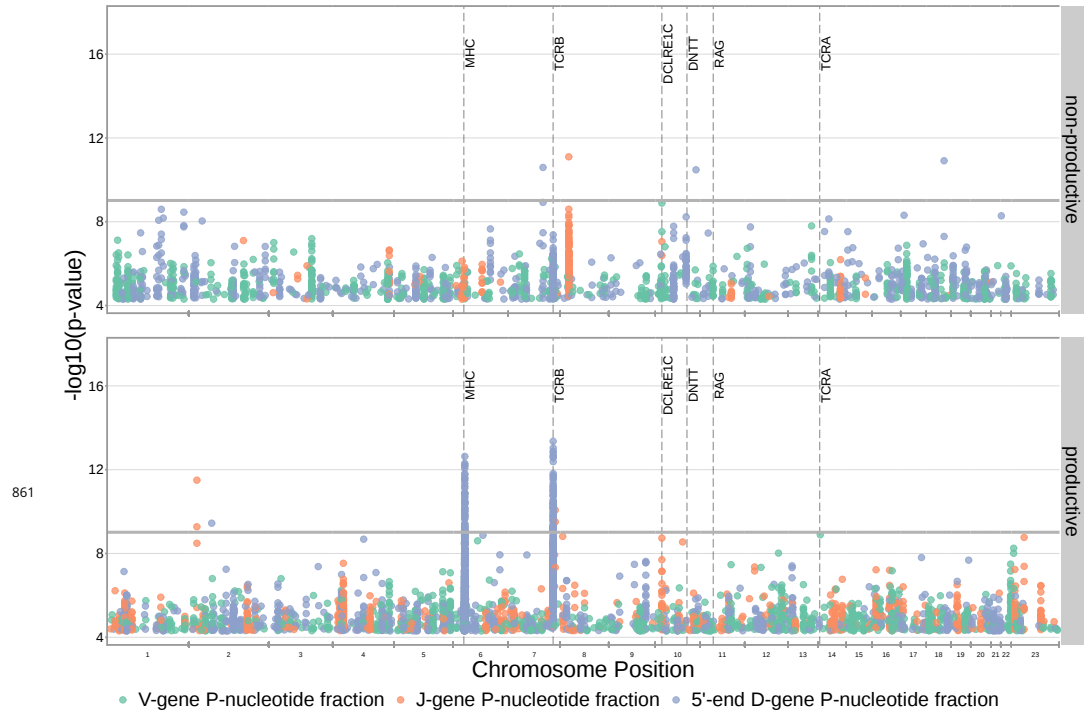

**Figure 3-Figure supplement 6.** SNP associations for all fractions of non-gene-trimmed TCRs containing P-nucleotides are not significant within the *DCLRE1C* locus. However, significant associations are present within the *TCRB* and *MHC* loci for the fraction of non-D-gene-trimmed, productive TCRs containing 5' end D-gene P-nucleotides. Only SNP associations whose  $P < 5 \times 10^{-5}$  are shown here. The gray horizontal line corresponds to a P-value of  $9.68 \times 10^{-10}$  (calculated using whole-genome Bonferroni correction, see Methods).

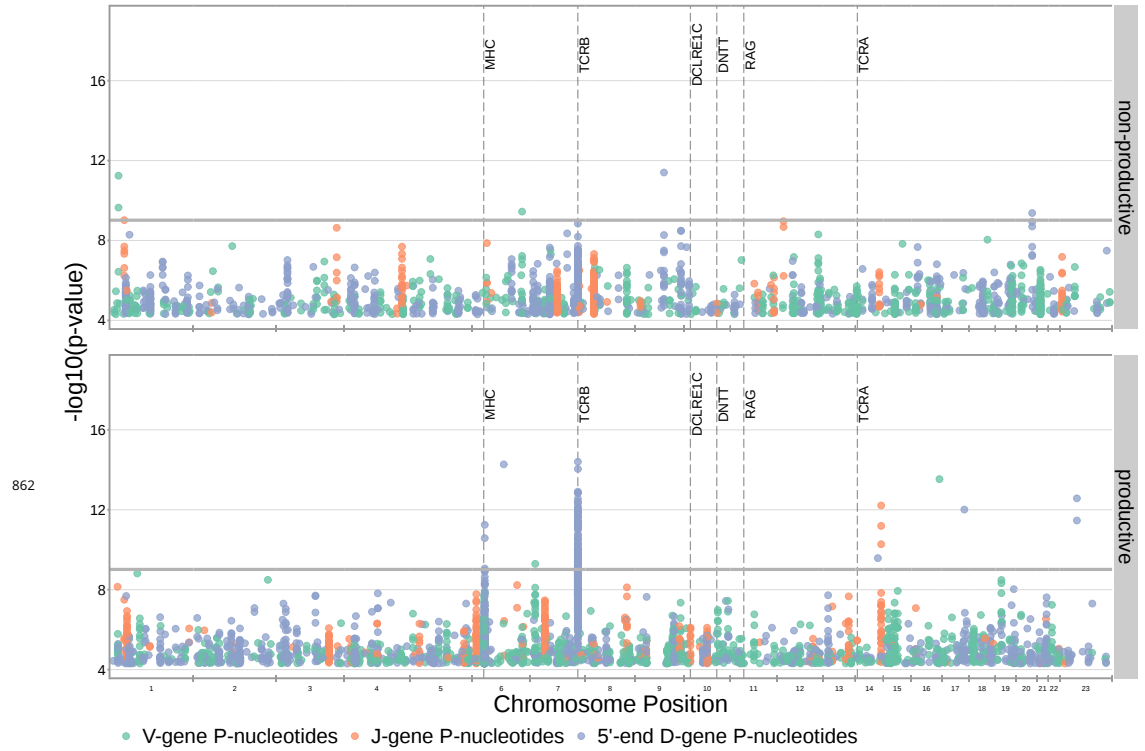

**Figure 3—Figure supplement 7.** SNP associations for the number of P-nucleotides are not significant within the *DCLRE1C* locus. However, significant associations are present within the *TCRB* and *MHC* loci. Only SNP associations whose  $P < 5 \times 10^{-5}$  are shown here. The gray horizontal line corresponds to a Bonferroni-corrected whole-genome P-value significance threshold of  $9.68 \times 10^{-10}$  (see Methods).

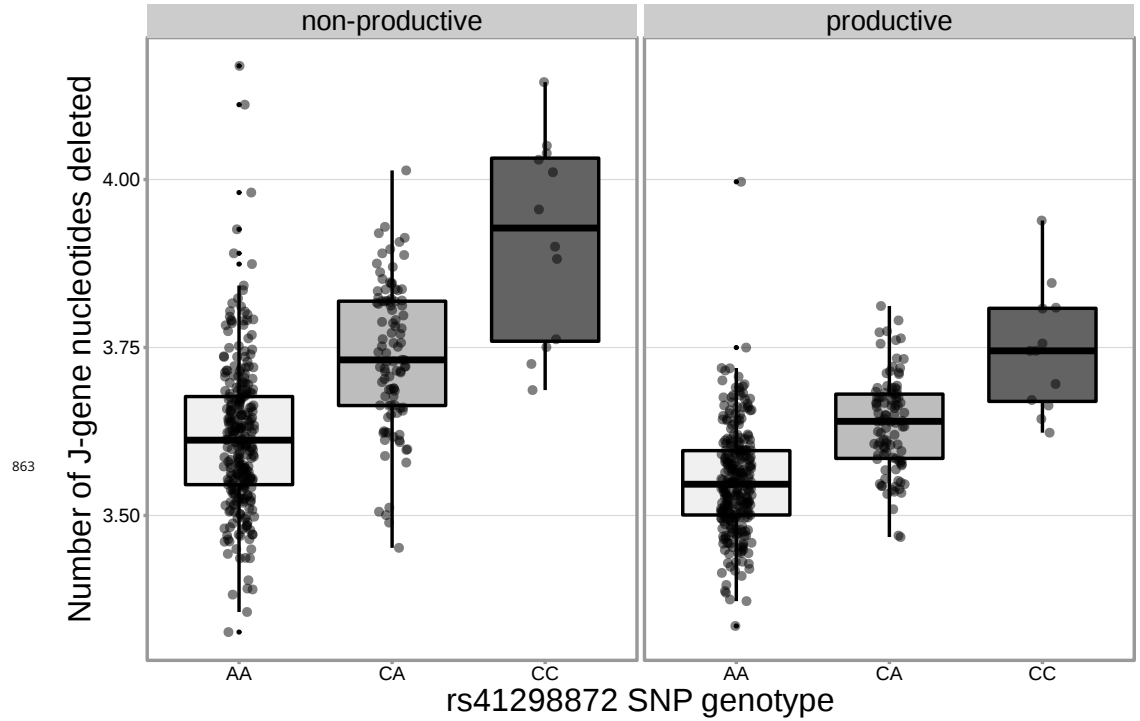

**Figure 4-Figure supplement 1.** The extent of J-gene trimming changes as a function of SNP genotype for the SNP (rs41298872) most significantly associated with J-gene trimming within the *DCLRE1C* locus. Only TCRs containing *TRBJ1-1\*01* (the most frequently used *TRBJ1* gene across subjects) were included when calculating the average number of J-gene nucleotides deleted for each subject.

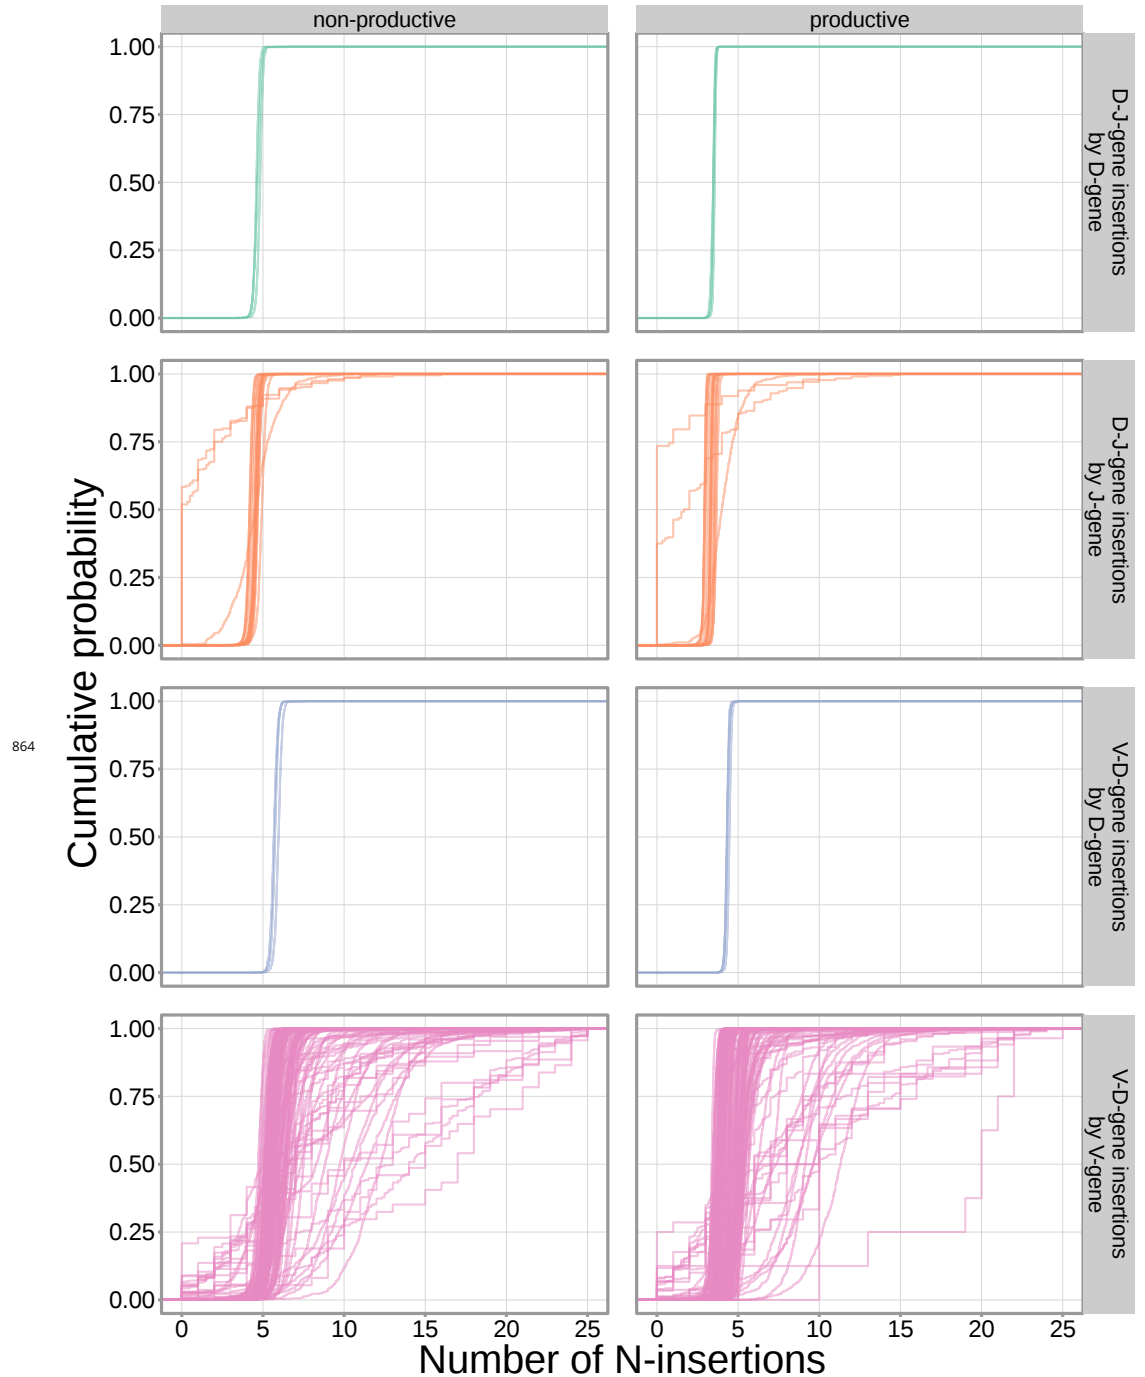

**Figure 5-Figure supplement 1.** The extent of N-insertion does not vary substantially by the gene allele identity for any gene type. An empirical cumulative distribution is drawn for each gene allele type within each indicated gene type (i.e. V-gene, D-gene, J-gene).

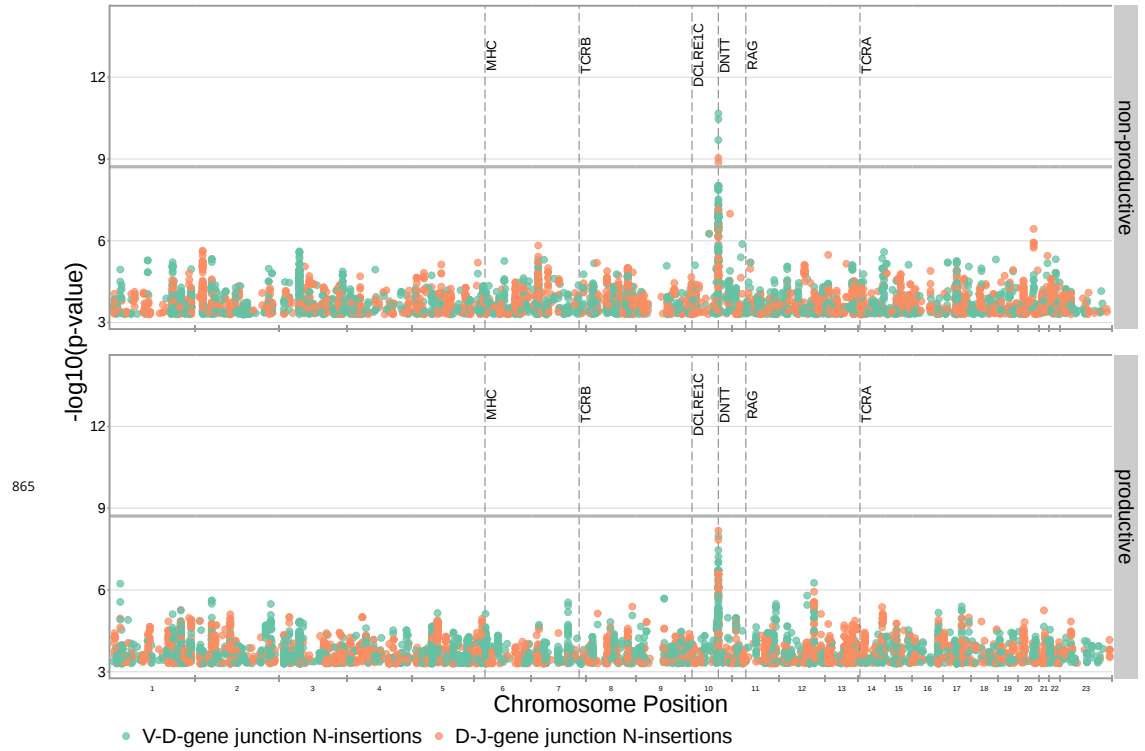

**Figure 5-Figure supplement 2.** Significant associations continue to be observed within the *DNNT* locus for both V-D- and D-J-gene-junction N-insertions when restricting the analysis to TCRs which contain *TRBJ1* genes (and consequently contain *TRBD1*). Only SNP associations whose  $P < 5 \times 10^{-4}$  are shown here. The gray horizontal line corresponds to a Bonferroni-corrected P-value significance threshold of  $1.94 \times 10^{-9}$  (calculated using whole-genome Bonferroni correction, see Methods).

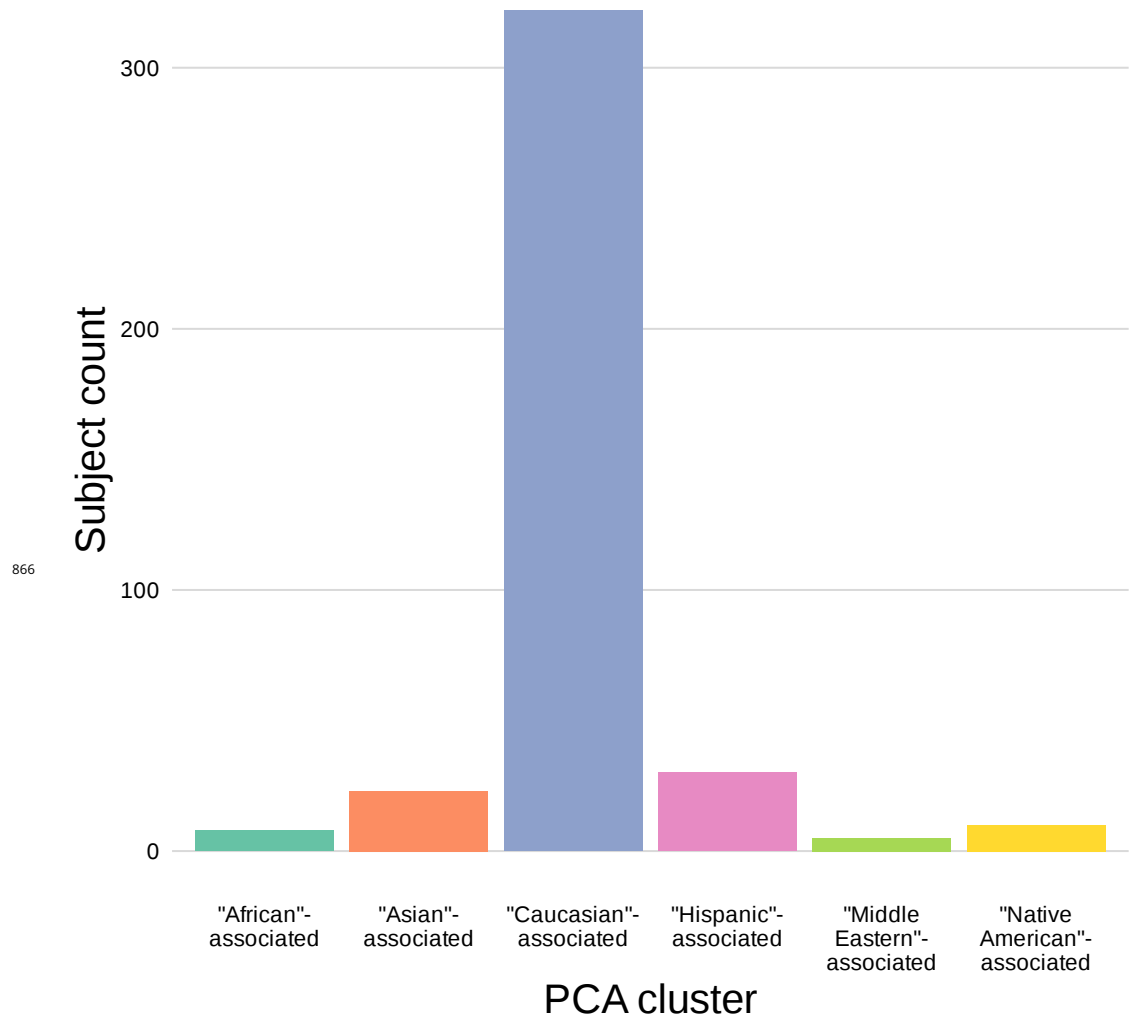

**Figure 7-Figure supplement 1.** The population mean is dominated by subjects in the "Caucasian"-associated PCA-cluster. Of the 398 subjects in the sample population, 81% are in the "Caucasian"-associated PCA-cluster.

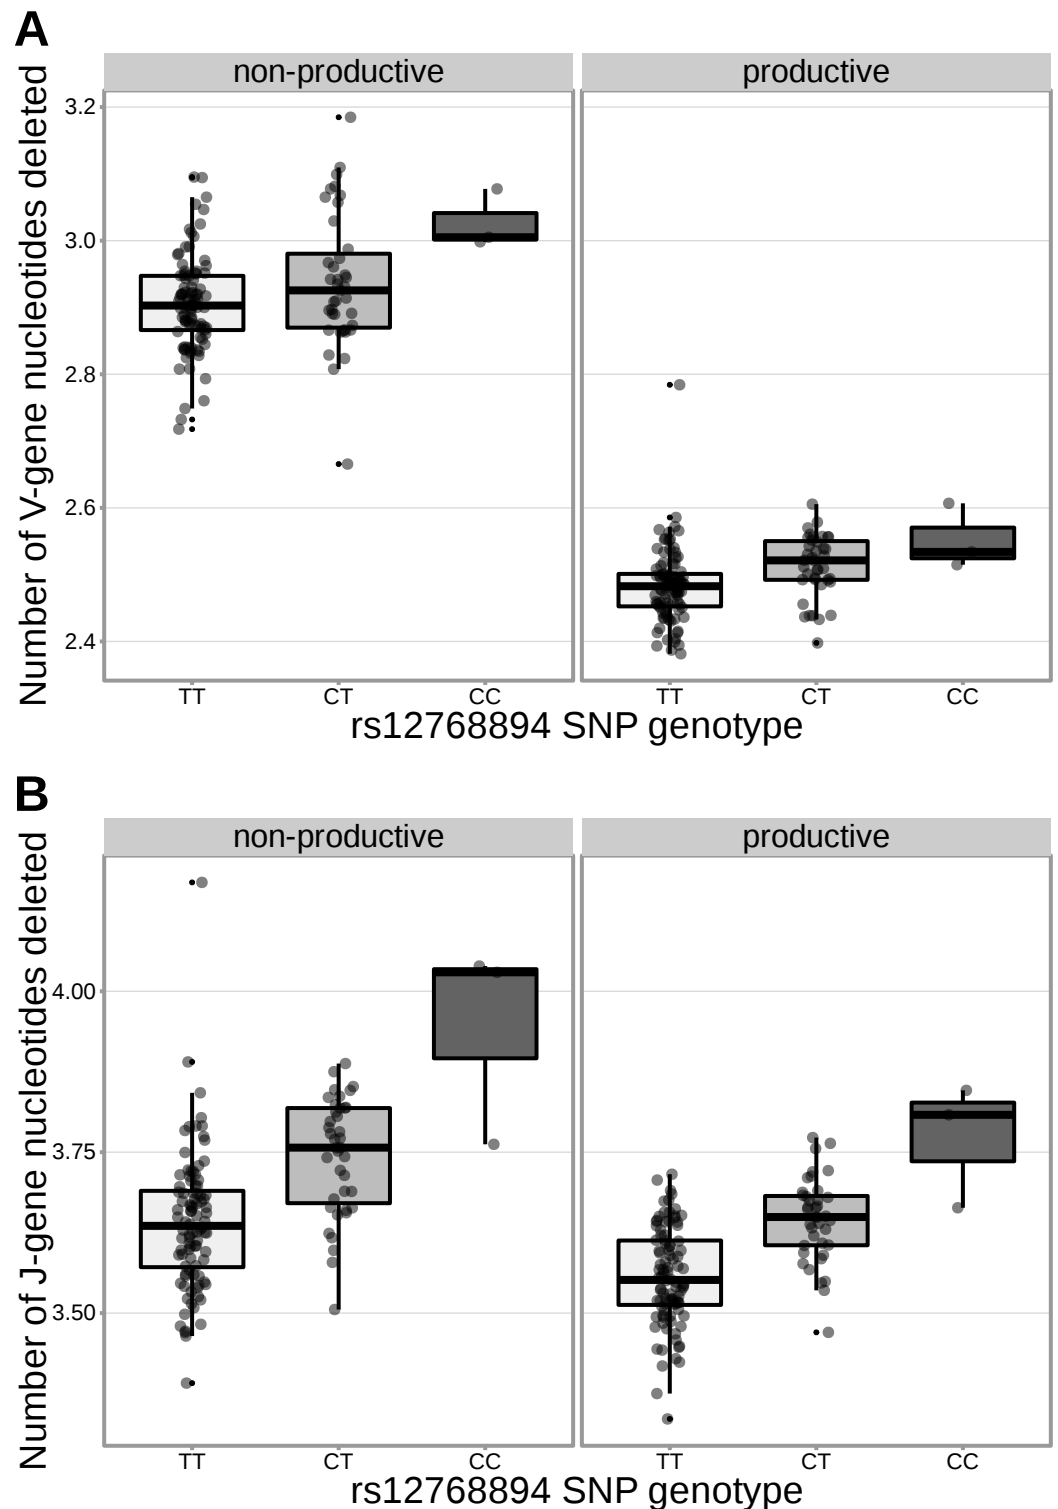

**Table 2-Figure supplement 1.** The extent of V- and J-gene trimming of productive and non-productive TCR $\beta$  chains changes as a function of SNP genotype within the discovery cohort for a non-synonymous *DCLRE1C* SNP (rs12768894, c.728A>G). Only TCRs containing *TRBJ1-1\*01* (the most frequently used *TRBJ1* gene across subjects) were included when calculating the average number of J-gene nucleotides deleted for each subject. Only TCRs containing *TRBV5-1\*01* (the most frequently used *TRBV* gene across subjects) were included when calculating the average number of V-gene nucleotides deleted for each subject.



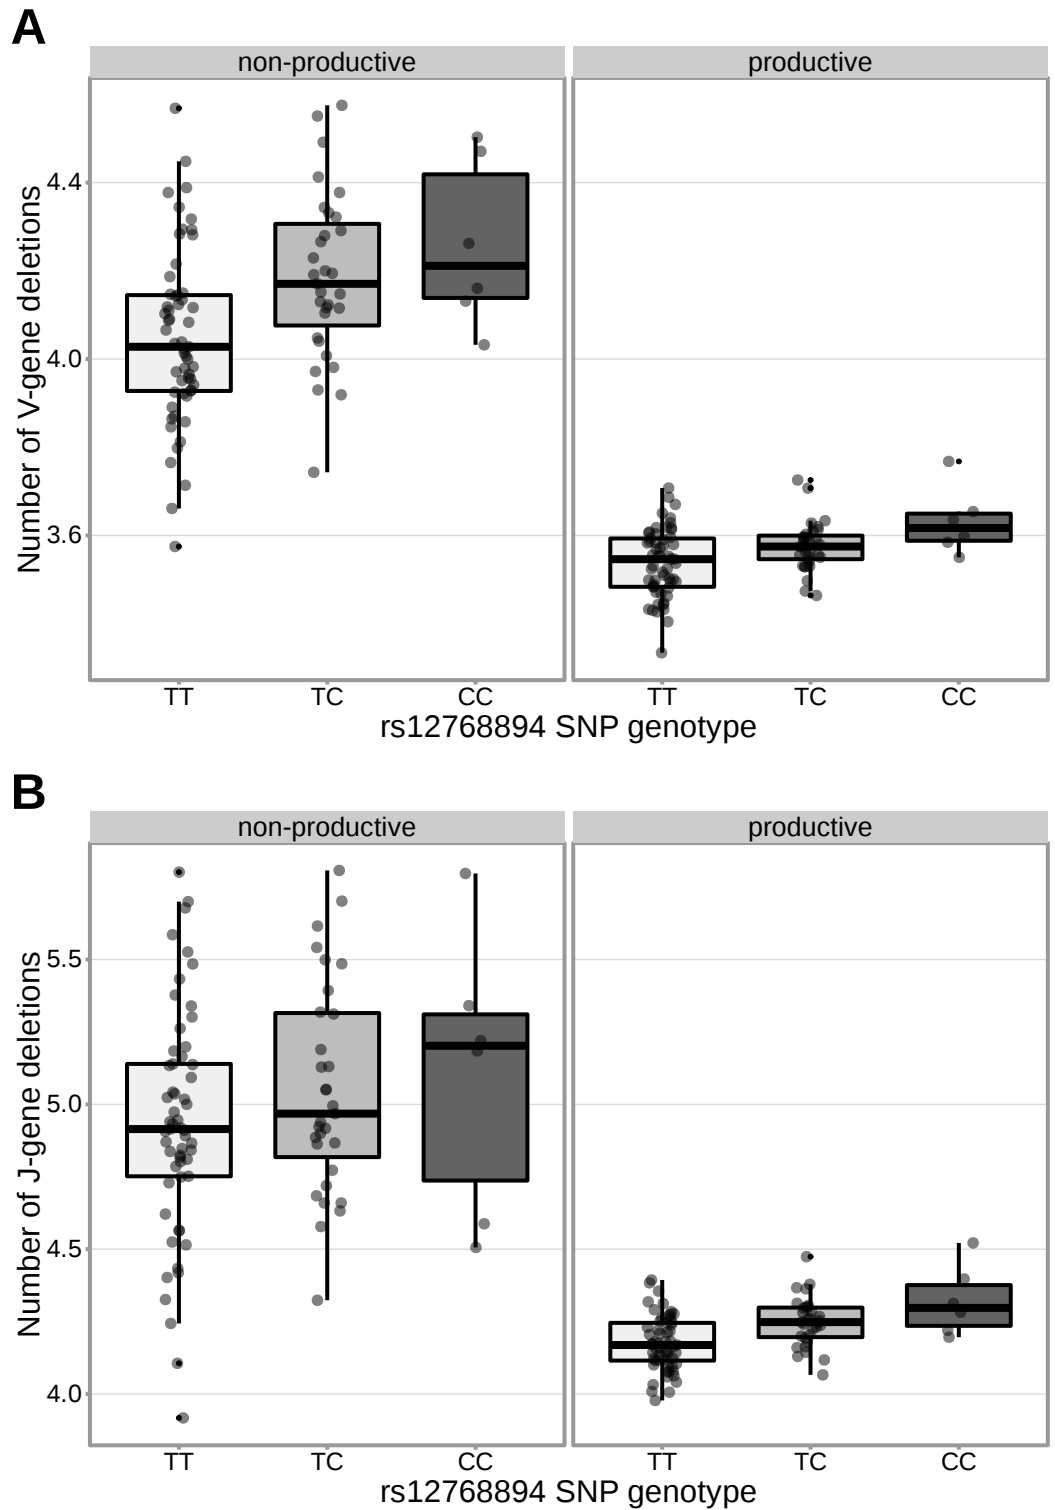

**Table 2-Figure supplement 2.** The extent of V-gene trimming (**A**) of productive and non-productive TCR $\beta$  chains and J-gene trimming (**B**) of productive TCR $\beta$  chains changes as a function of SNP genotype within the validation cohort for a non-synonymous *DCLRE1C* SNP (rs12768894, c.728A>G). The average number of nucleotides deleted was calculated across all TCR $\beta$  chains for each subject, regardless of gene-usage.

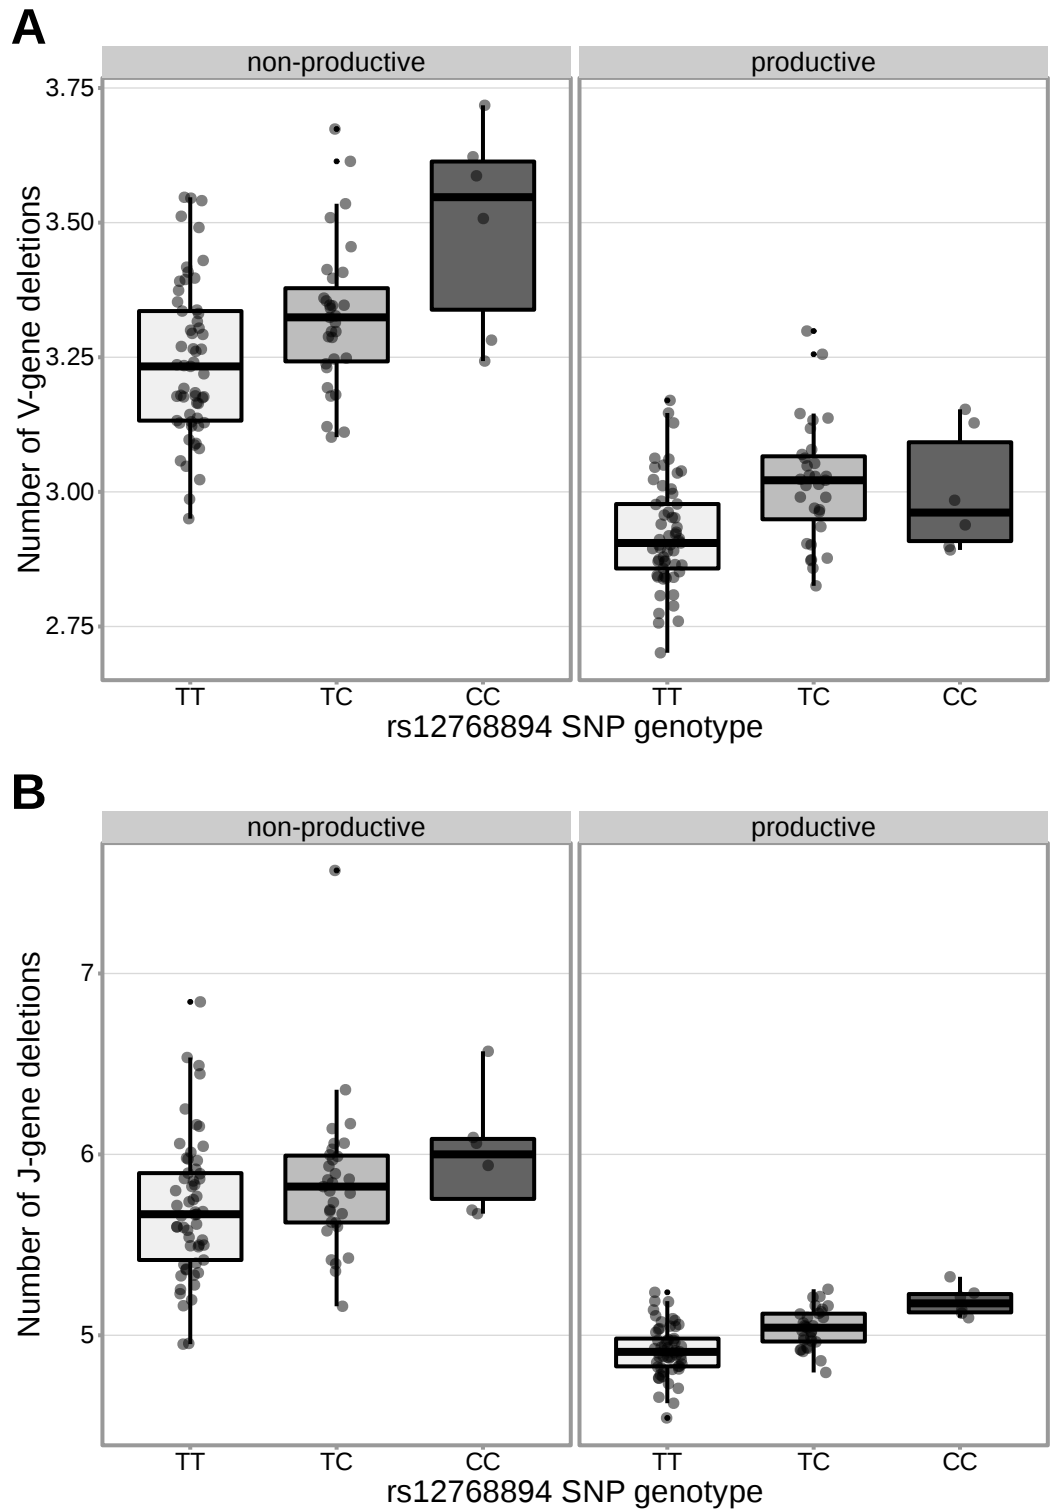

**Table 2-Figure supplement 3.** The extent of V- (A) and J-gene (B) trimming of productive and non-productive TCR $\alpha$  chains changes as a function of SNP genotype within the validation cohort for a non-synonymous *DCLRE1C* SNP (rs12768894, c.728A>G). The average number of nucleotides deleted was calculated across all TCR $\alpha$  chains for each subject, regardless of gene-usage.

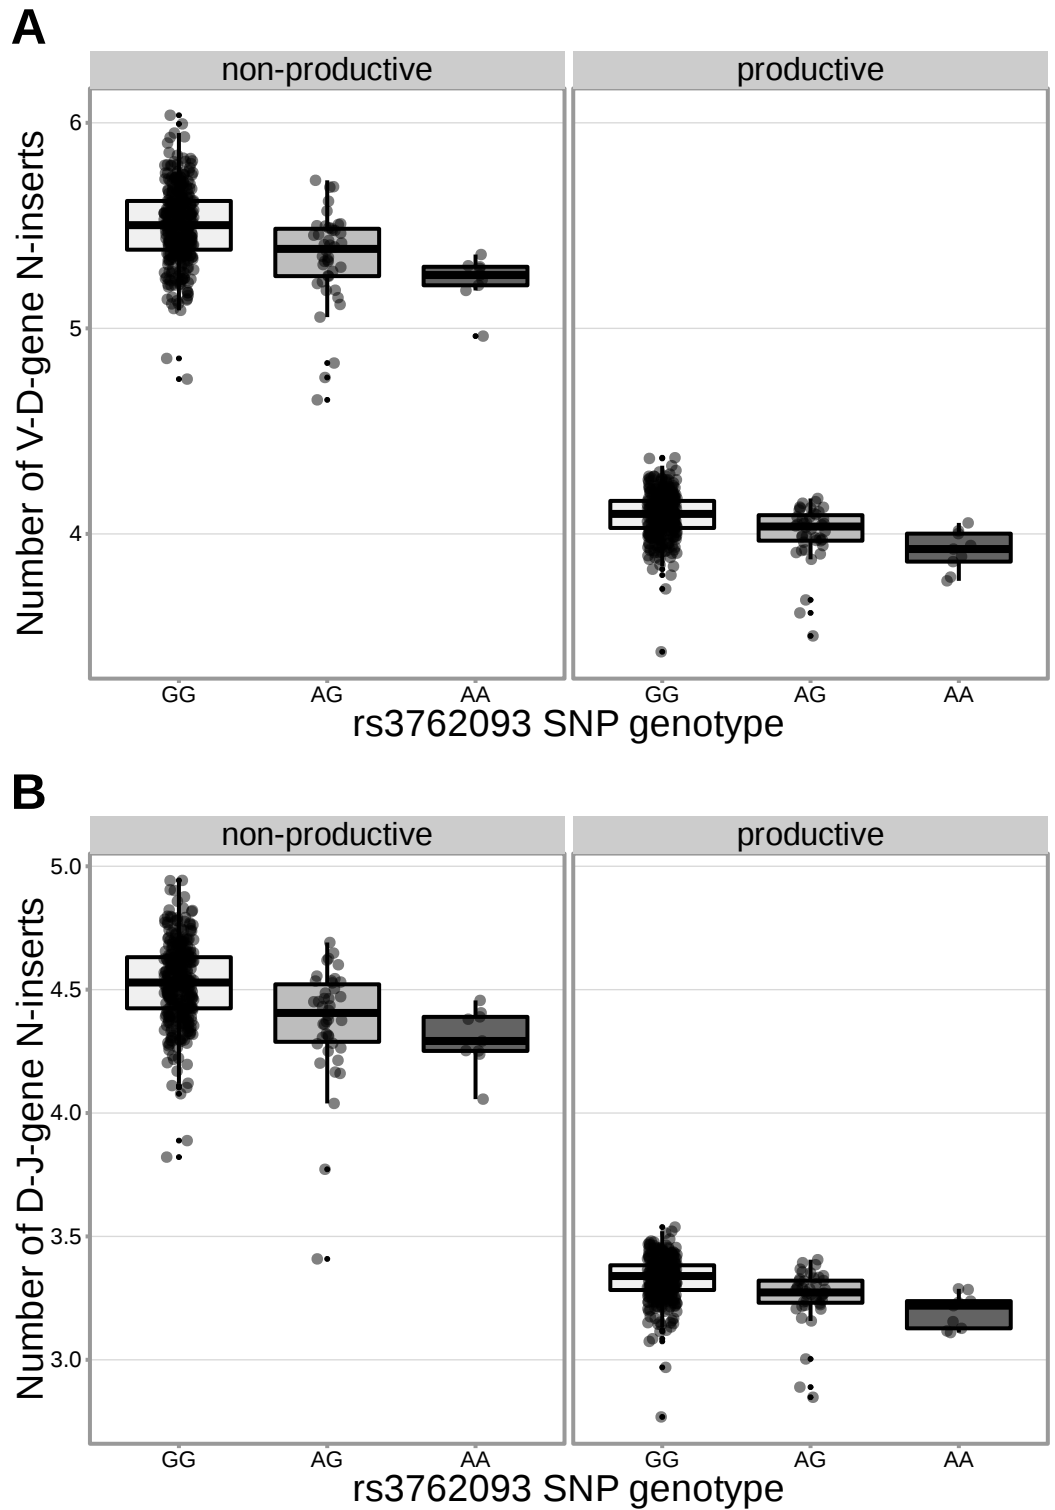

**Table 2-Figure supplement 4.** The extent of V-D and D-J N-insertion of productive and non-productive TCR $\beta$  chains changes as a function of SNP genotype within the discovery cohort for an intronic *DNTT* SNP (rs3762093). The average number of N-insertions was calculated across all TCR $\beta$  chains for each subject.

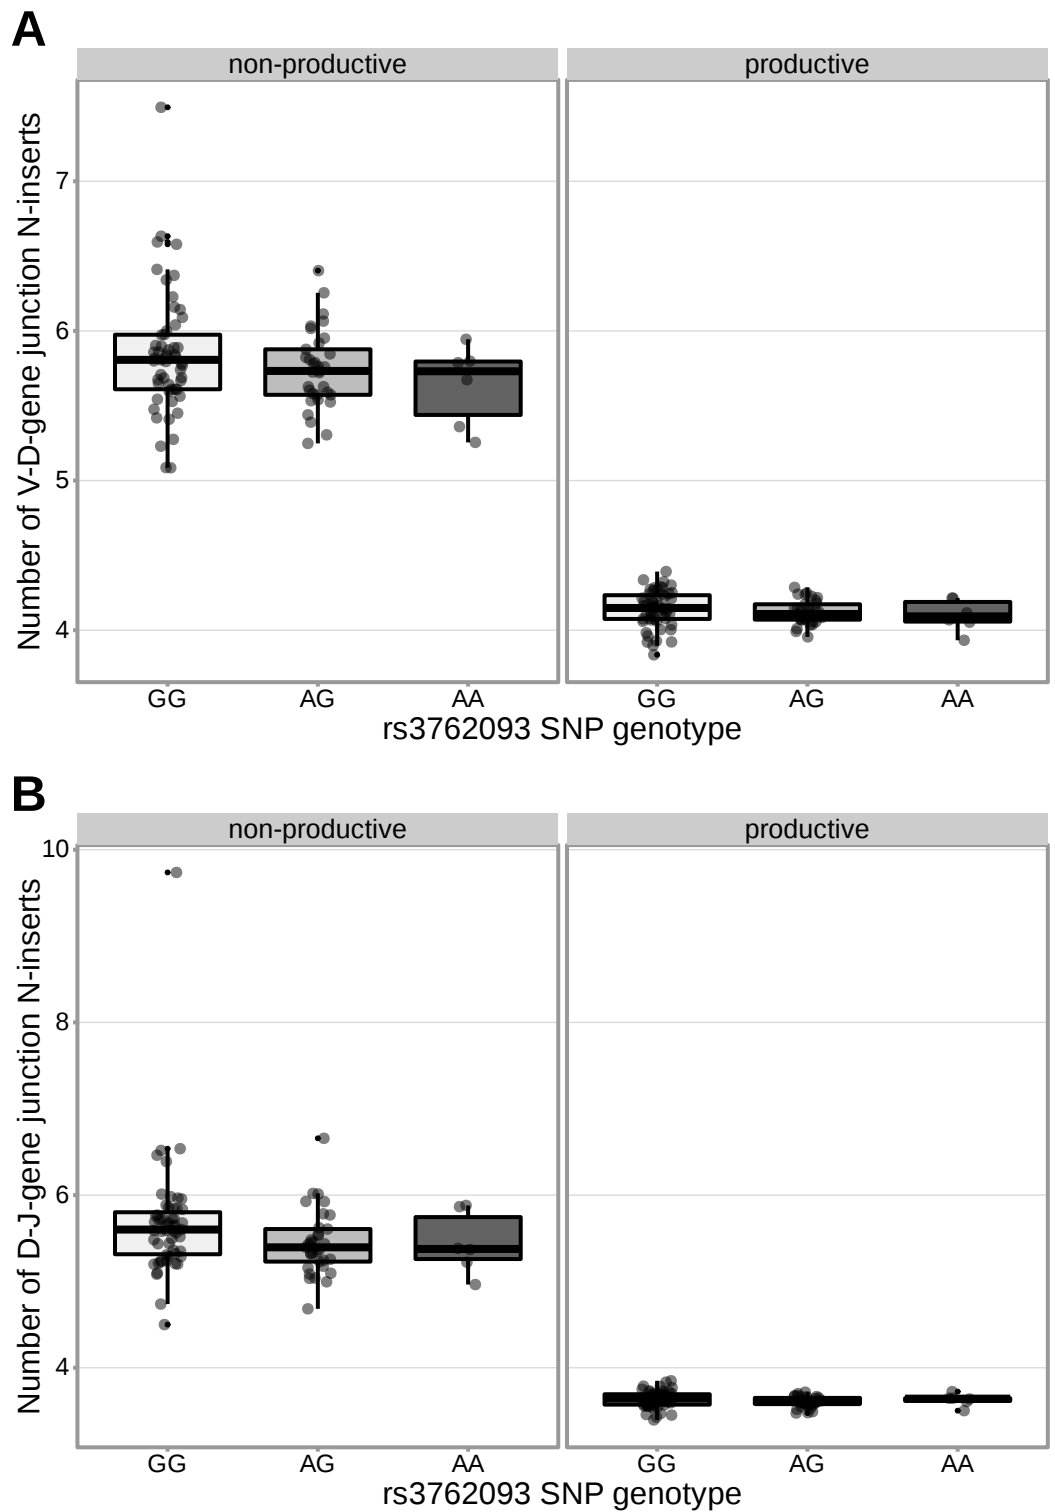

**Table 2-Figure supplement 5.** An intronic SNP (rs3762093) within the *DNTT* gene locus is not strongly associated with the number of V-D (**A**) or D-J (**B**) N-inserts within productive or non-productive TCR $\beta$  chains in the validation cohort. However, the direction of the effect is the same as the discovery cohort for all N-insertion and productivity types. The average number of N-insertions was calculated across all TCR $\beta$  chains for each subject.

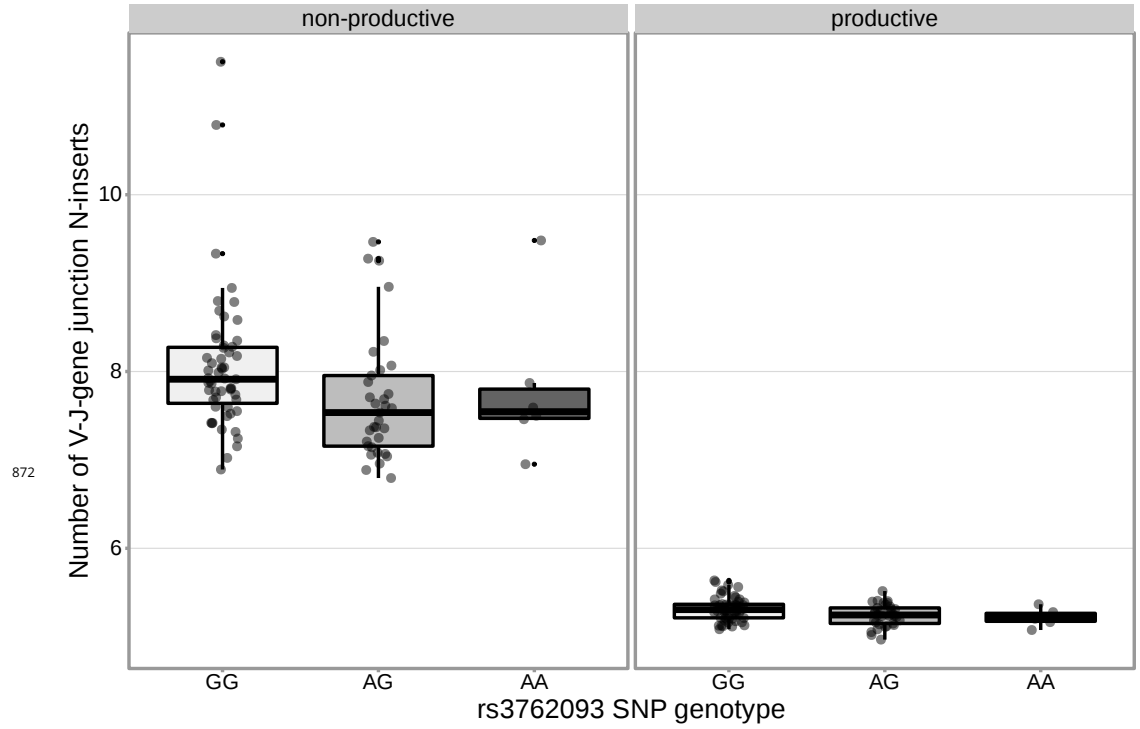

**Table 2-Figure supplement 6.** An intronic SNP (rs3762093) within the *DNTT* gene locus is significantly associated with the number of V-J N-inserts for productive TCR $\alpha$  chains in the validation cohort. This SNP is not significantly associated with the number of V-J N-inserts for non-productive TCR $\alpha$  chains in the validation cohort. The average number of N-insertions was calculated across all TCR $\alpha$  chains for each subject.

$-\log_{10}(\text{p-value})$

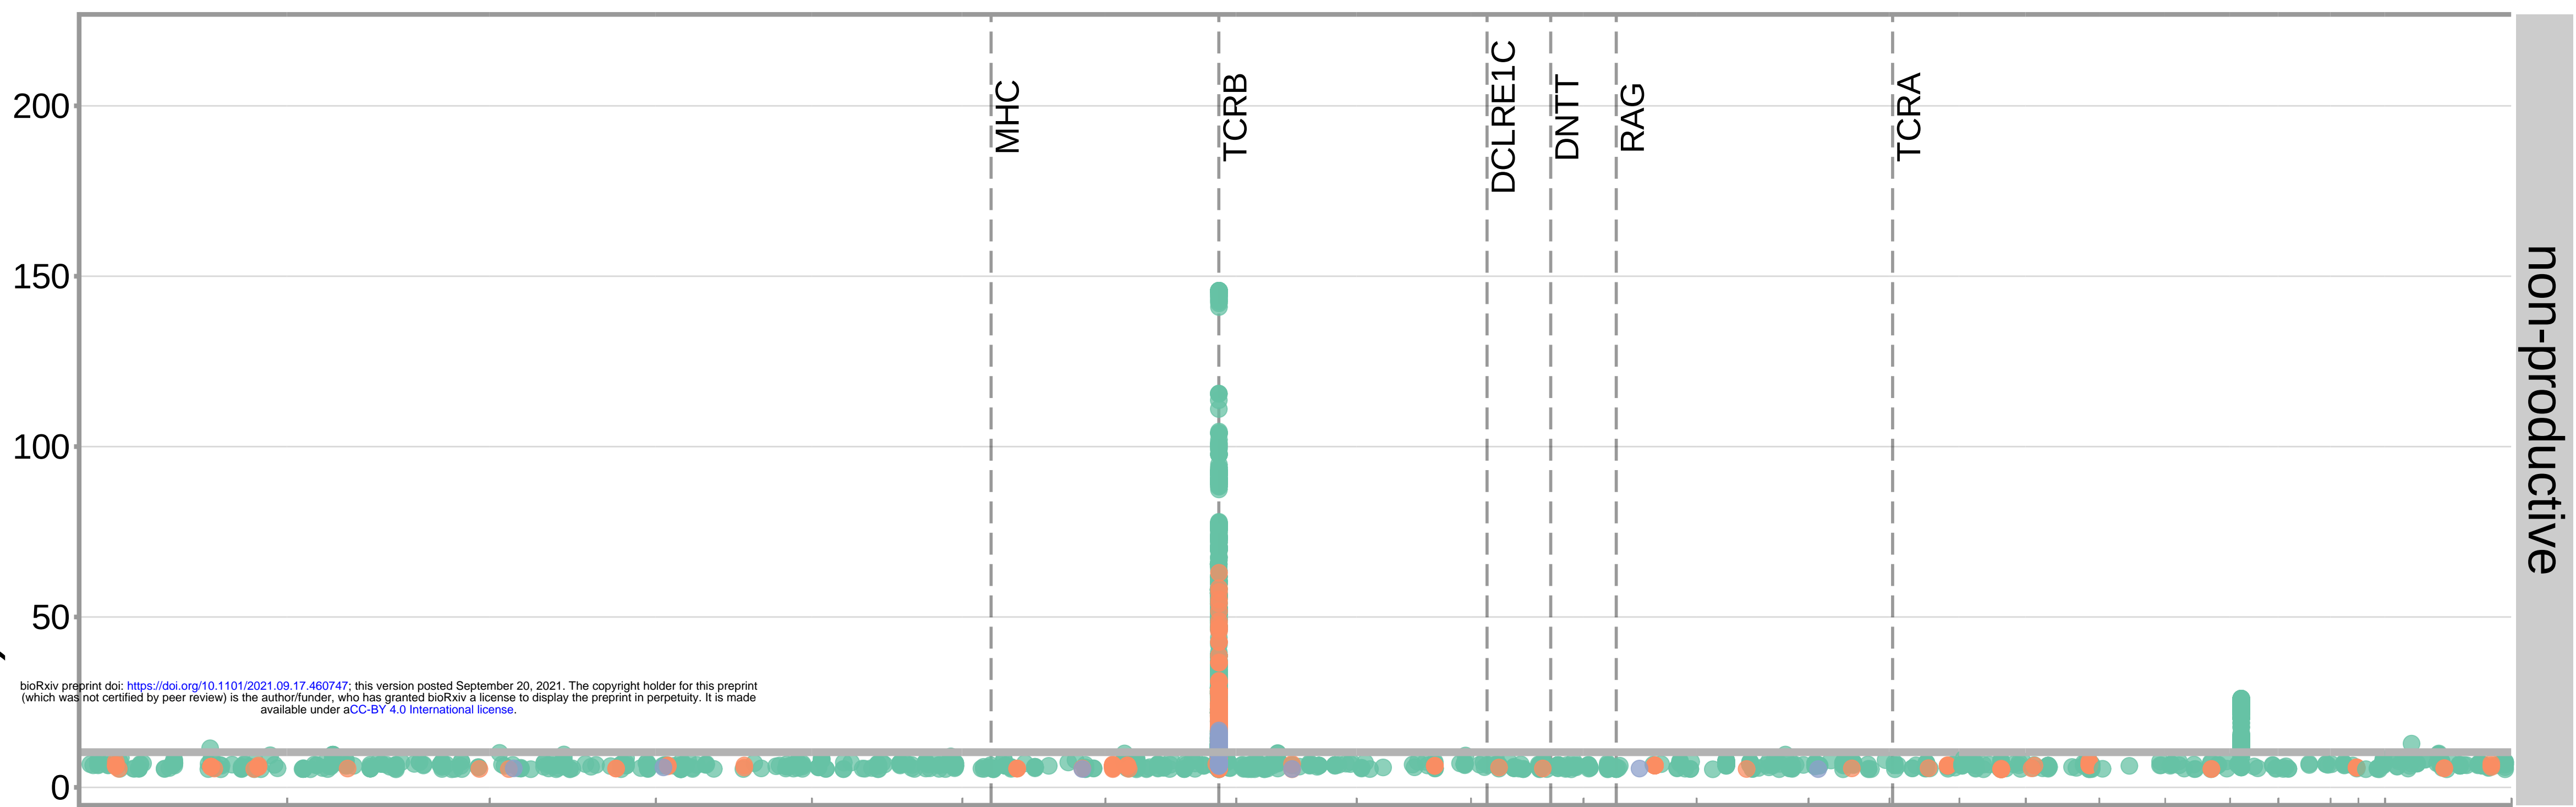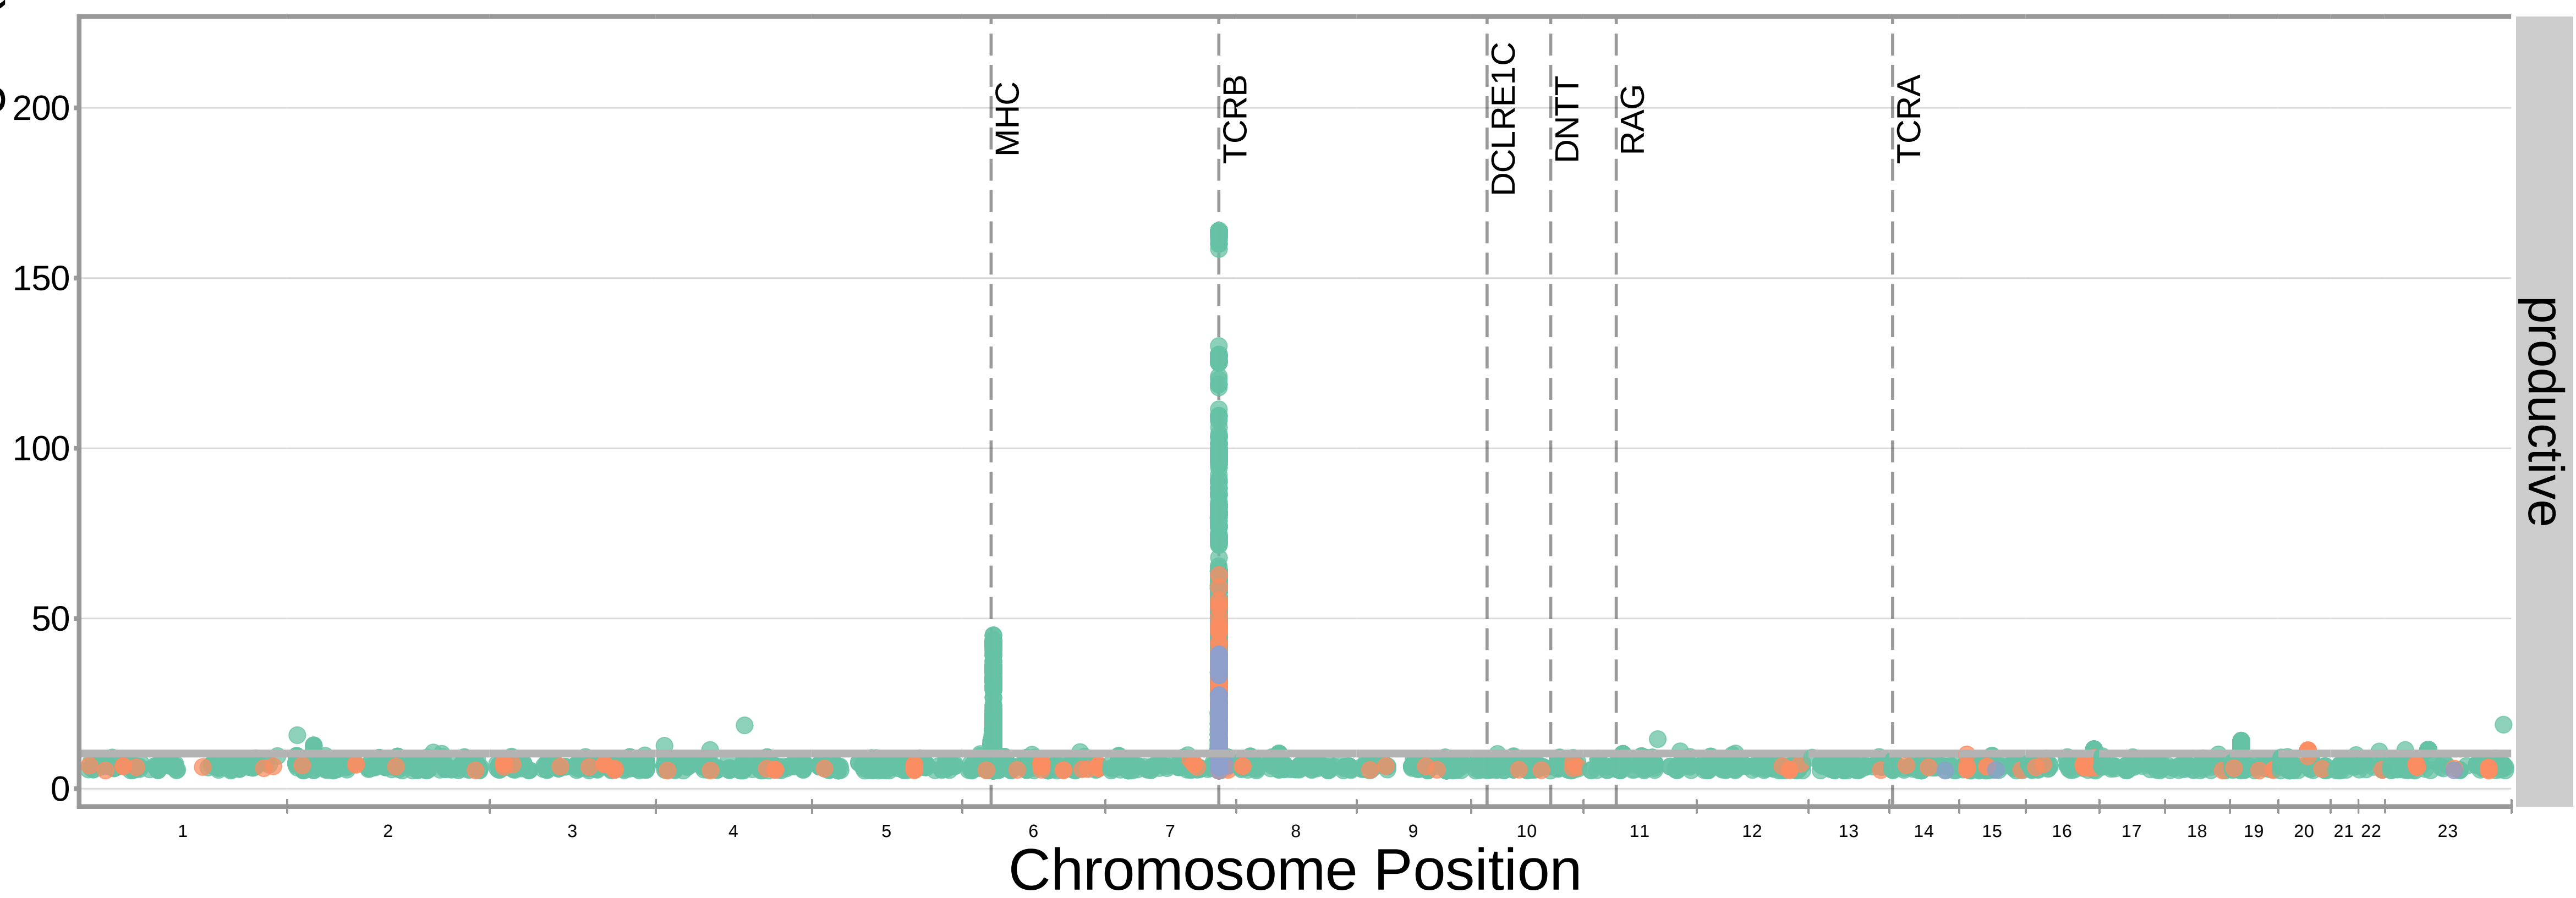

● D-gene usage ● J-gene usage ● V-gene usage

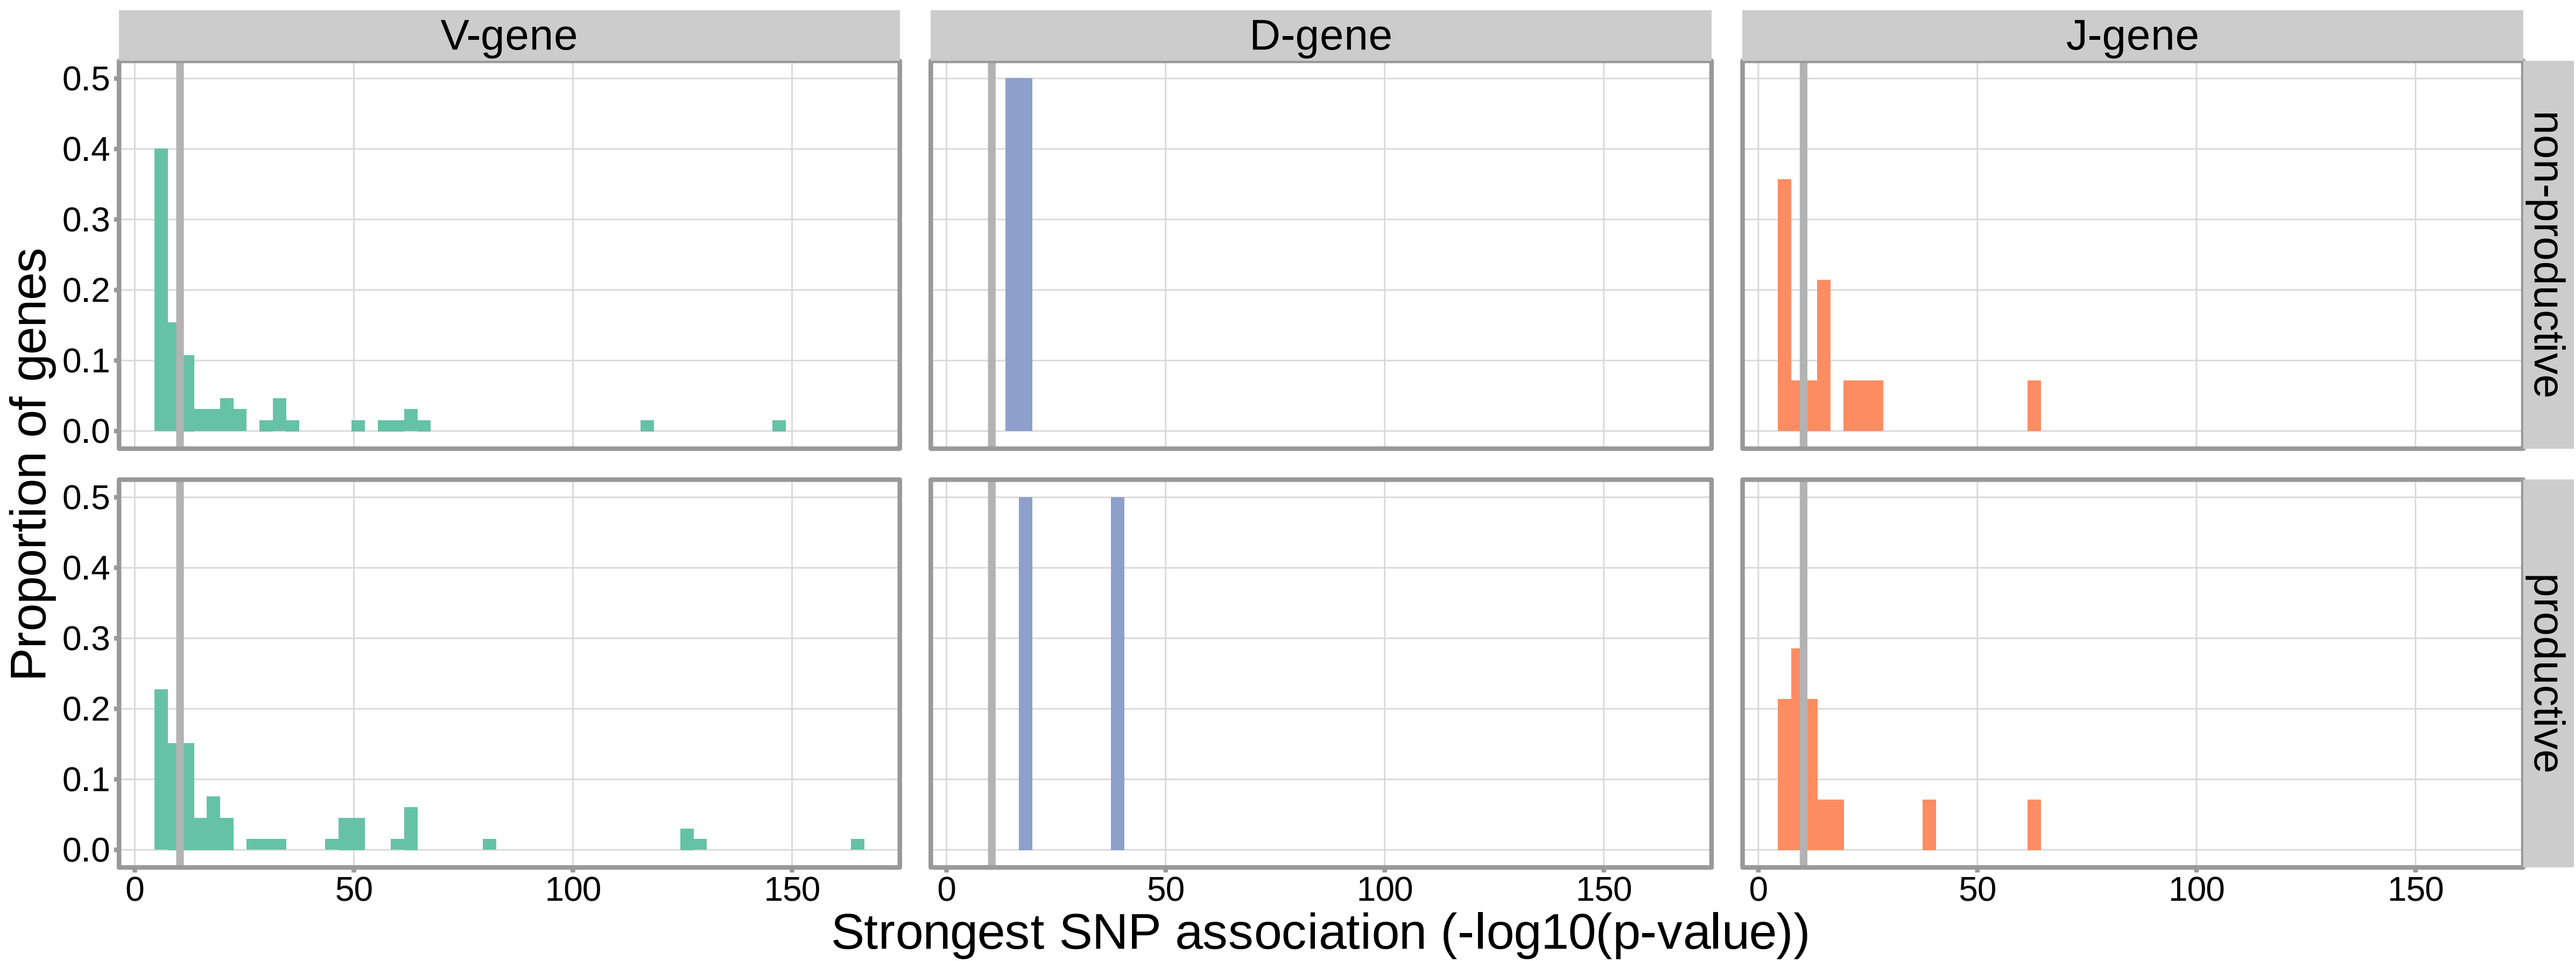



$-\log_{10}(\text{p-value})$

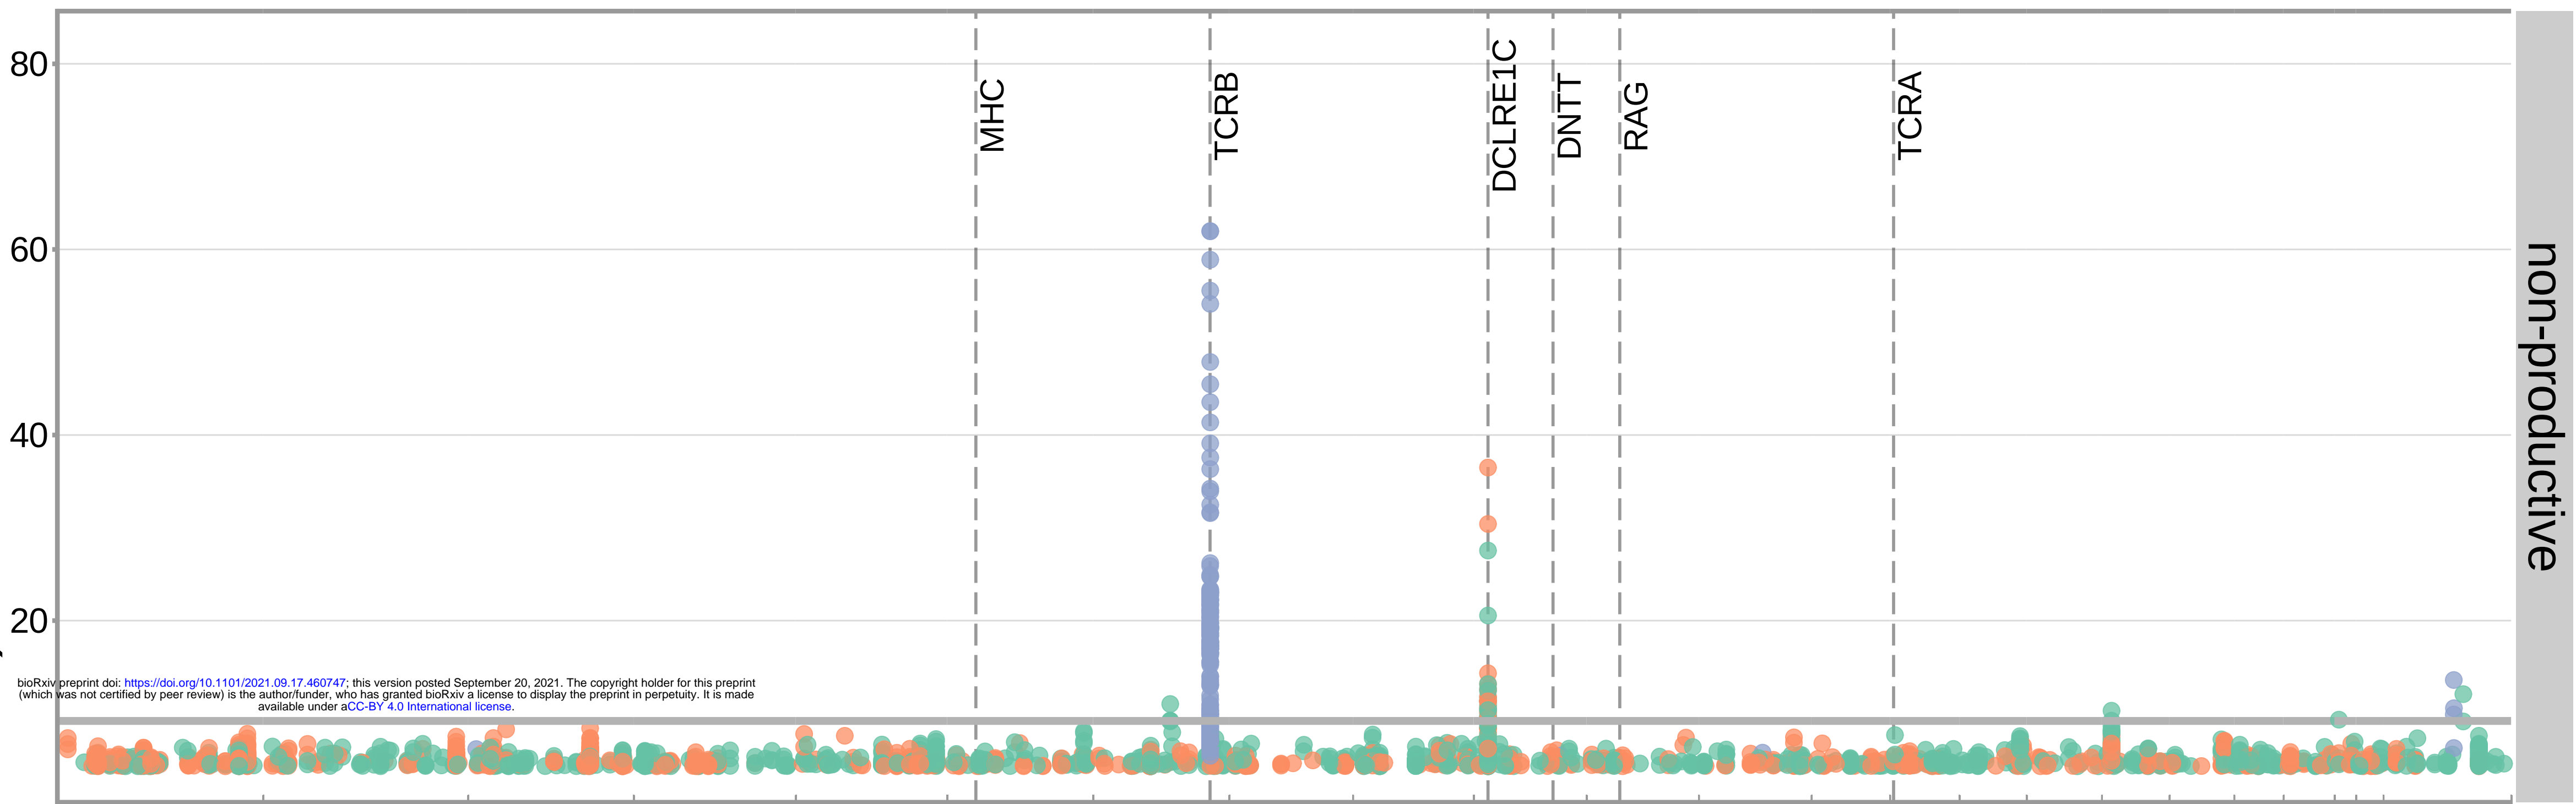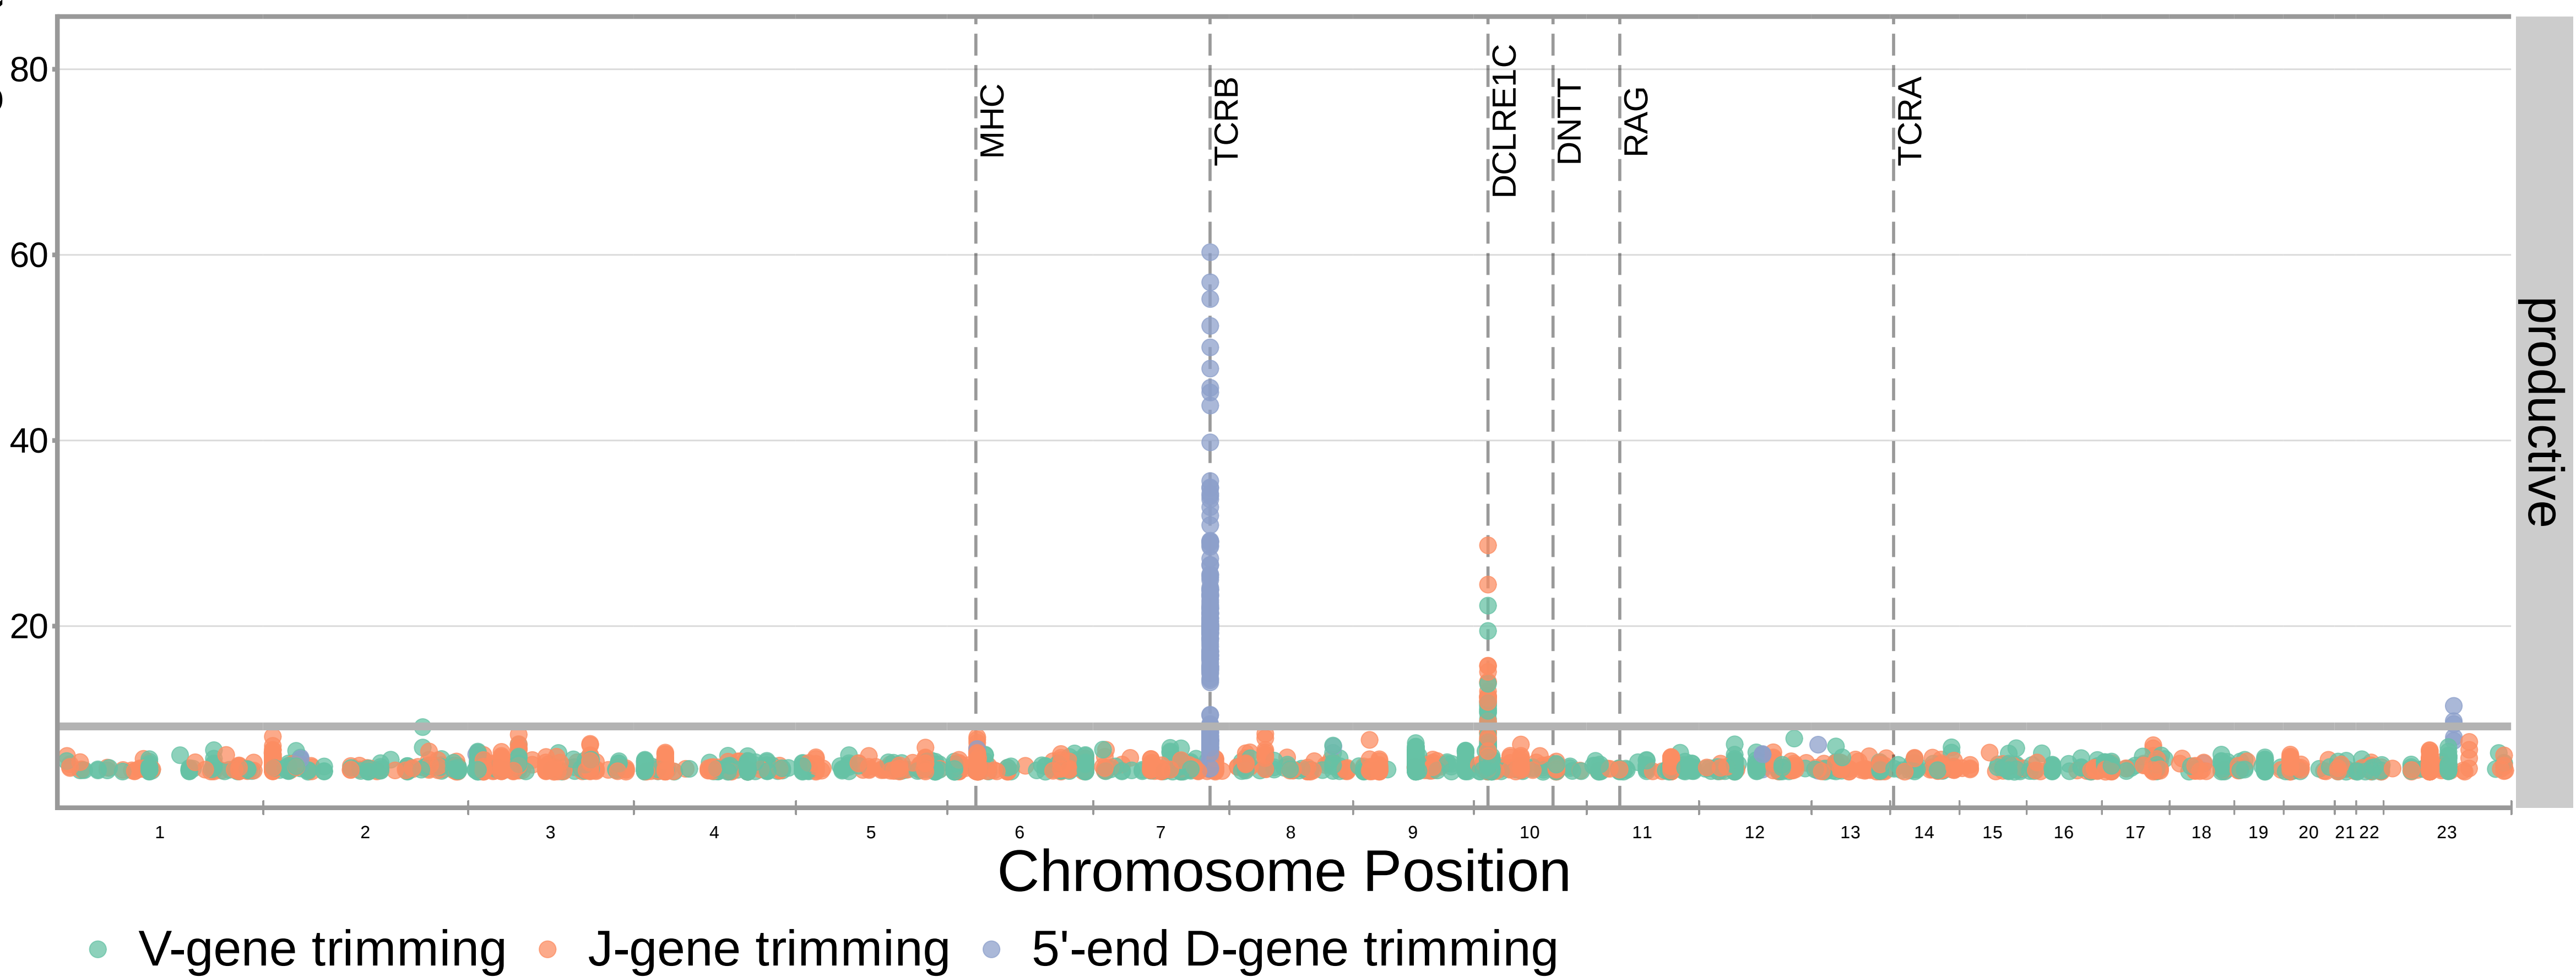

rs2367486 genotype

2

1

0

0

1

2

TRBD2\*02 allele genotype

Subject count

60

50

40

30

20

10

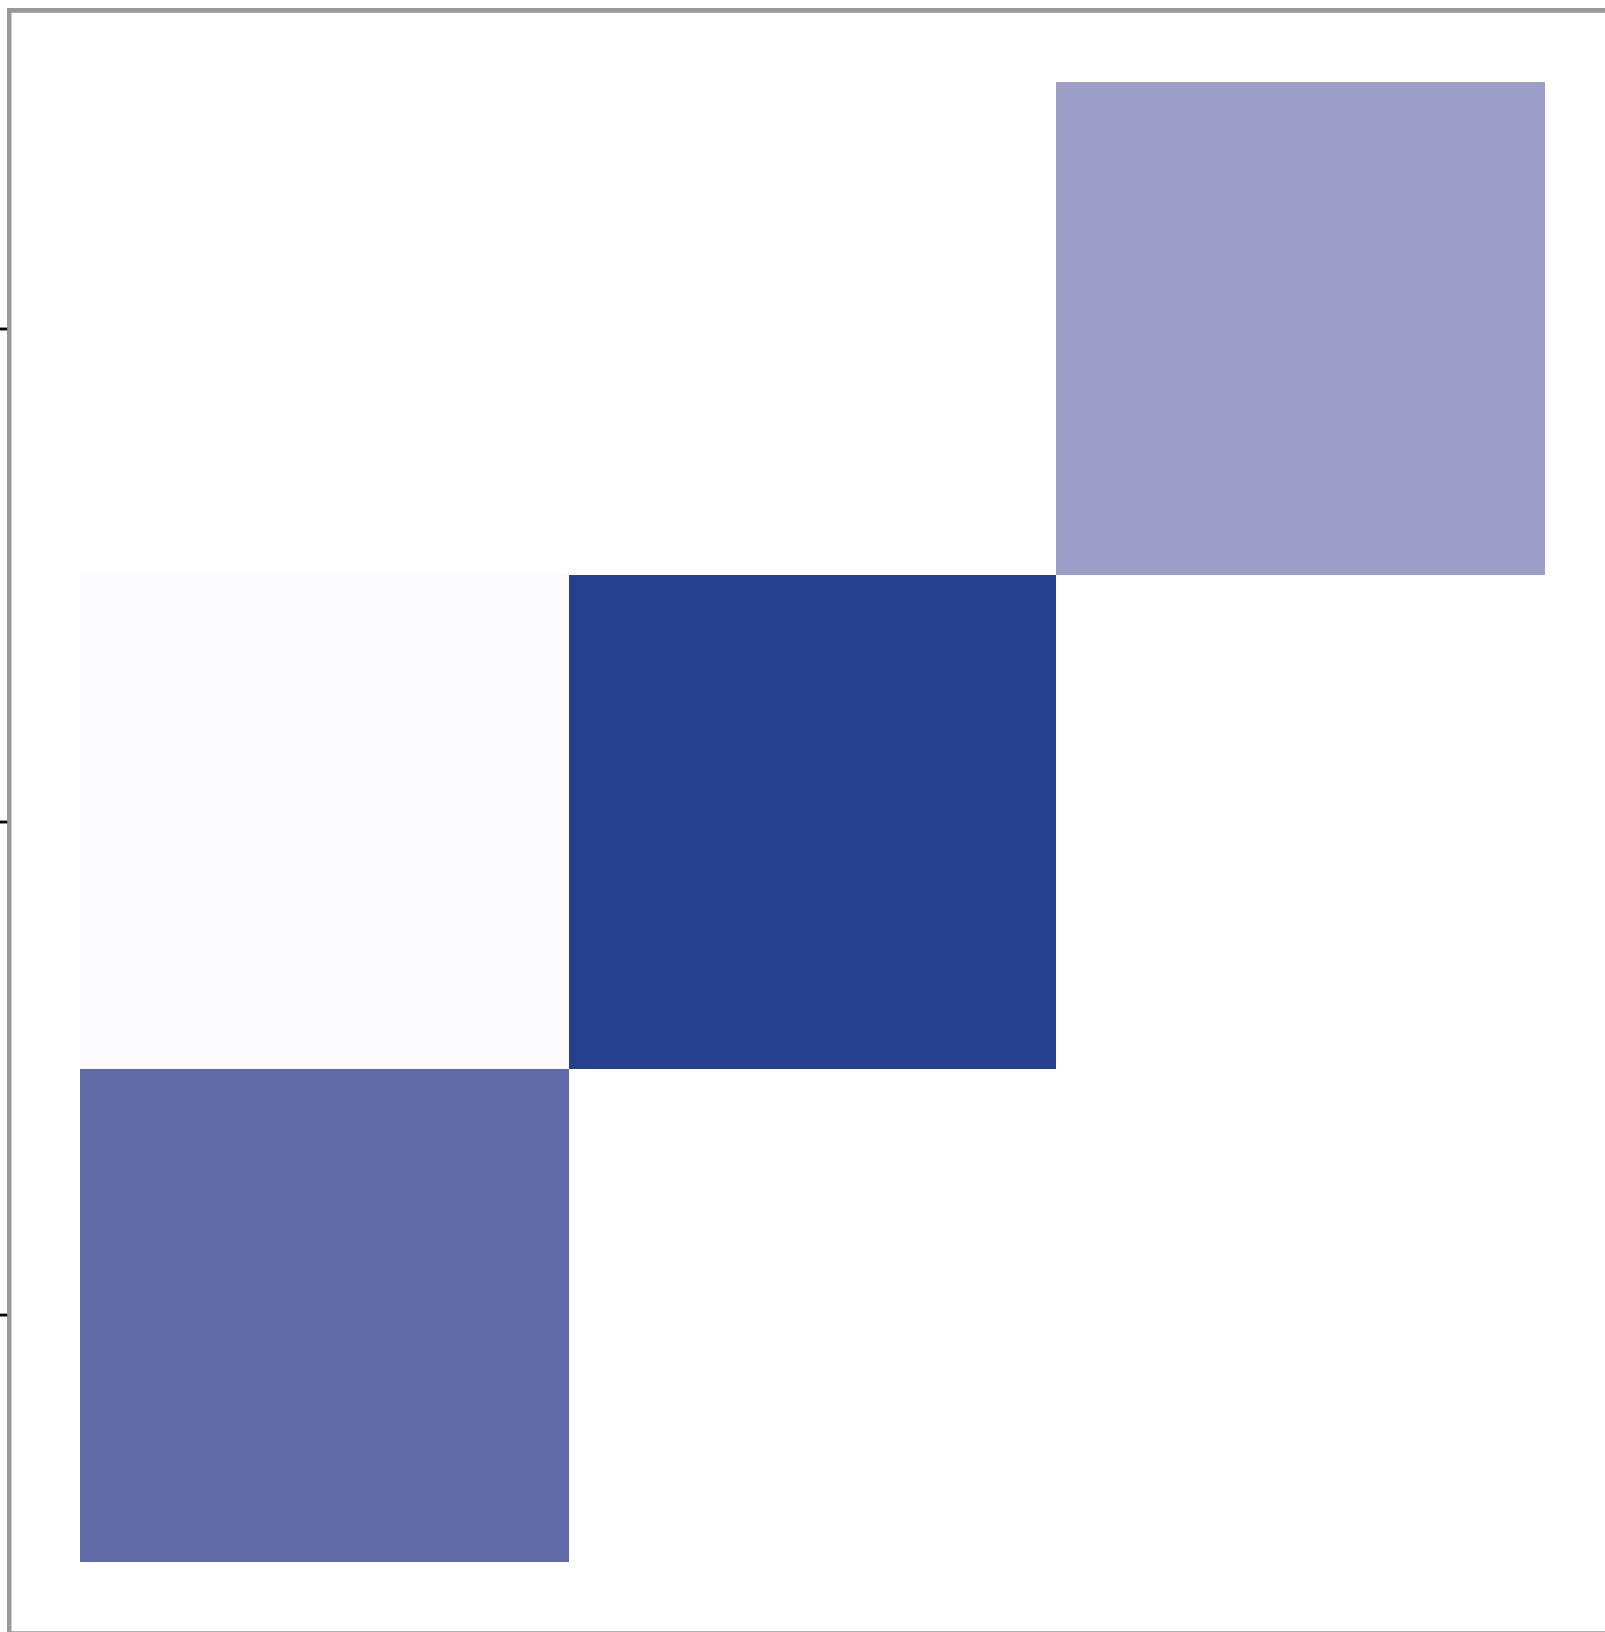

$-\log_{10}(\text{p-value})$

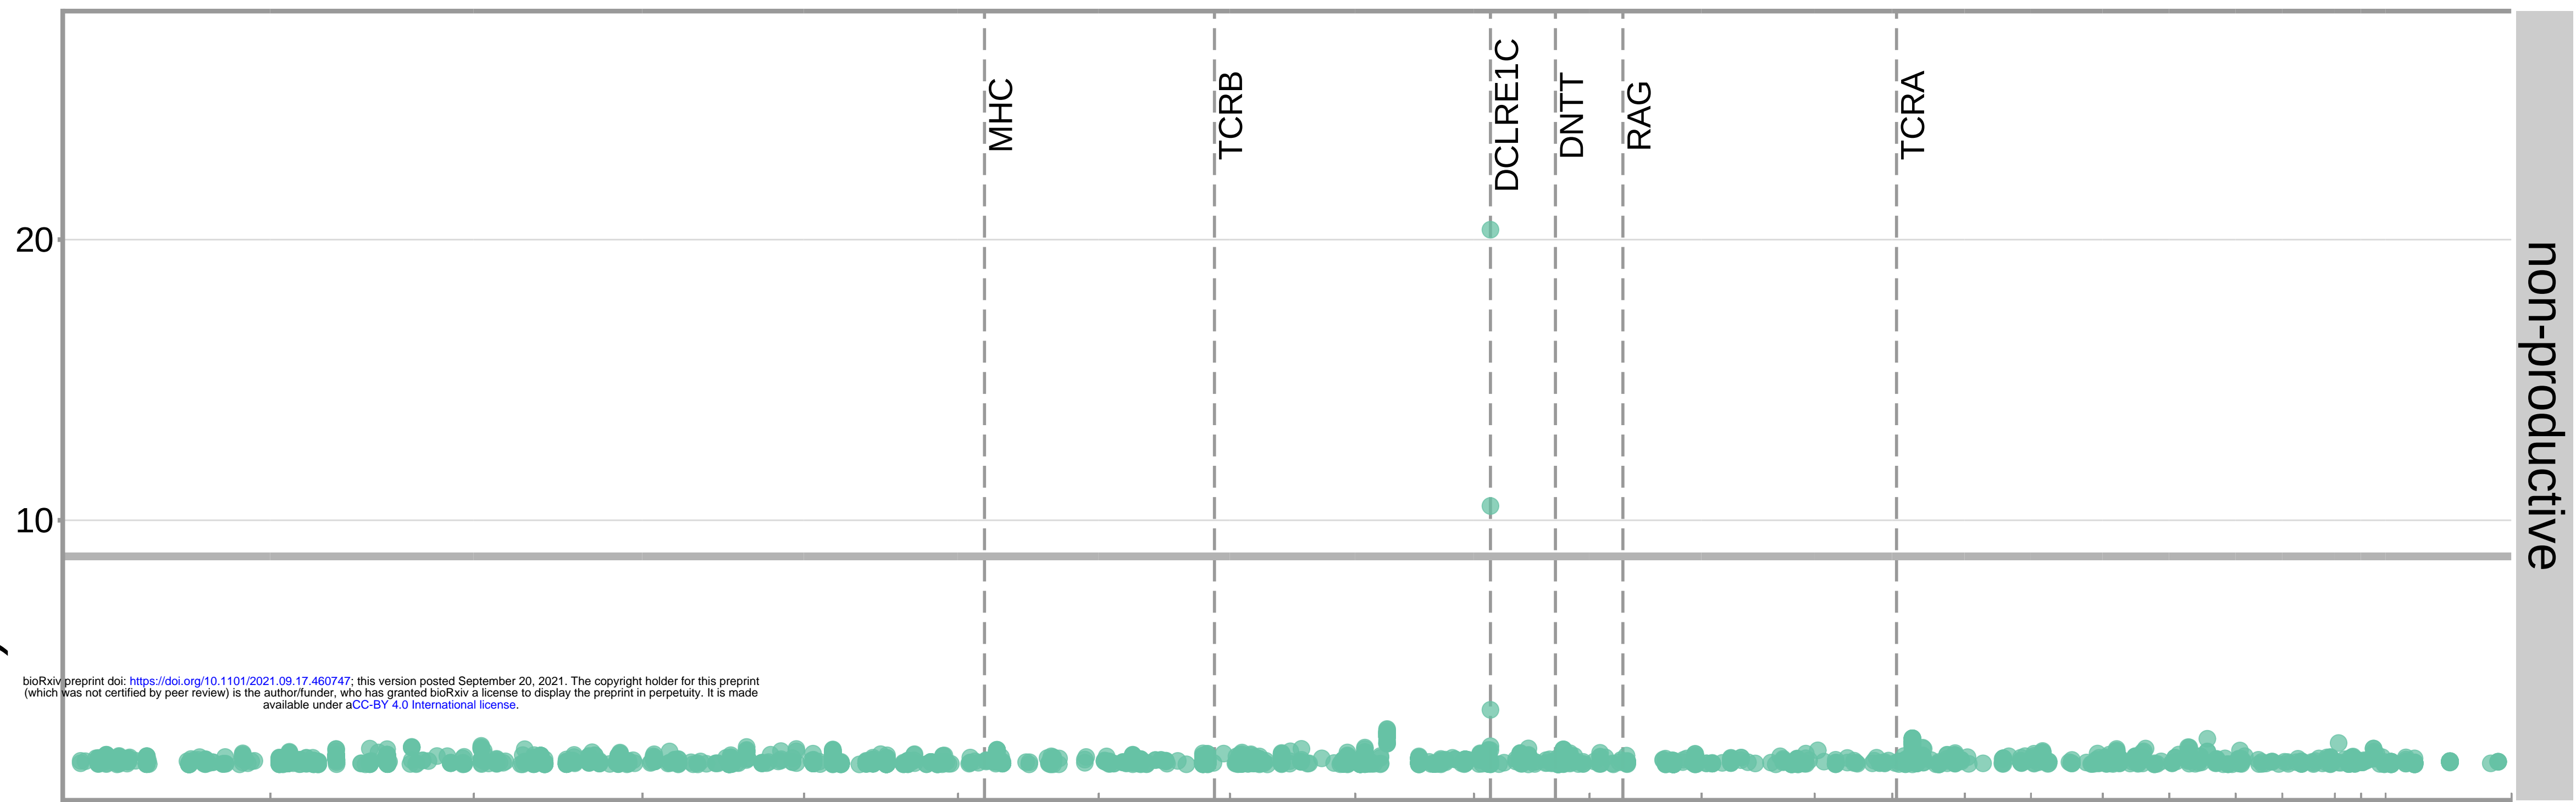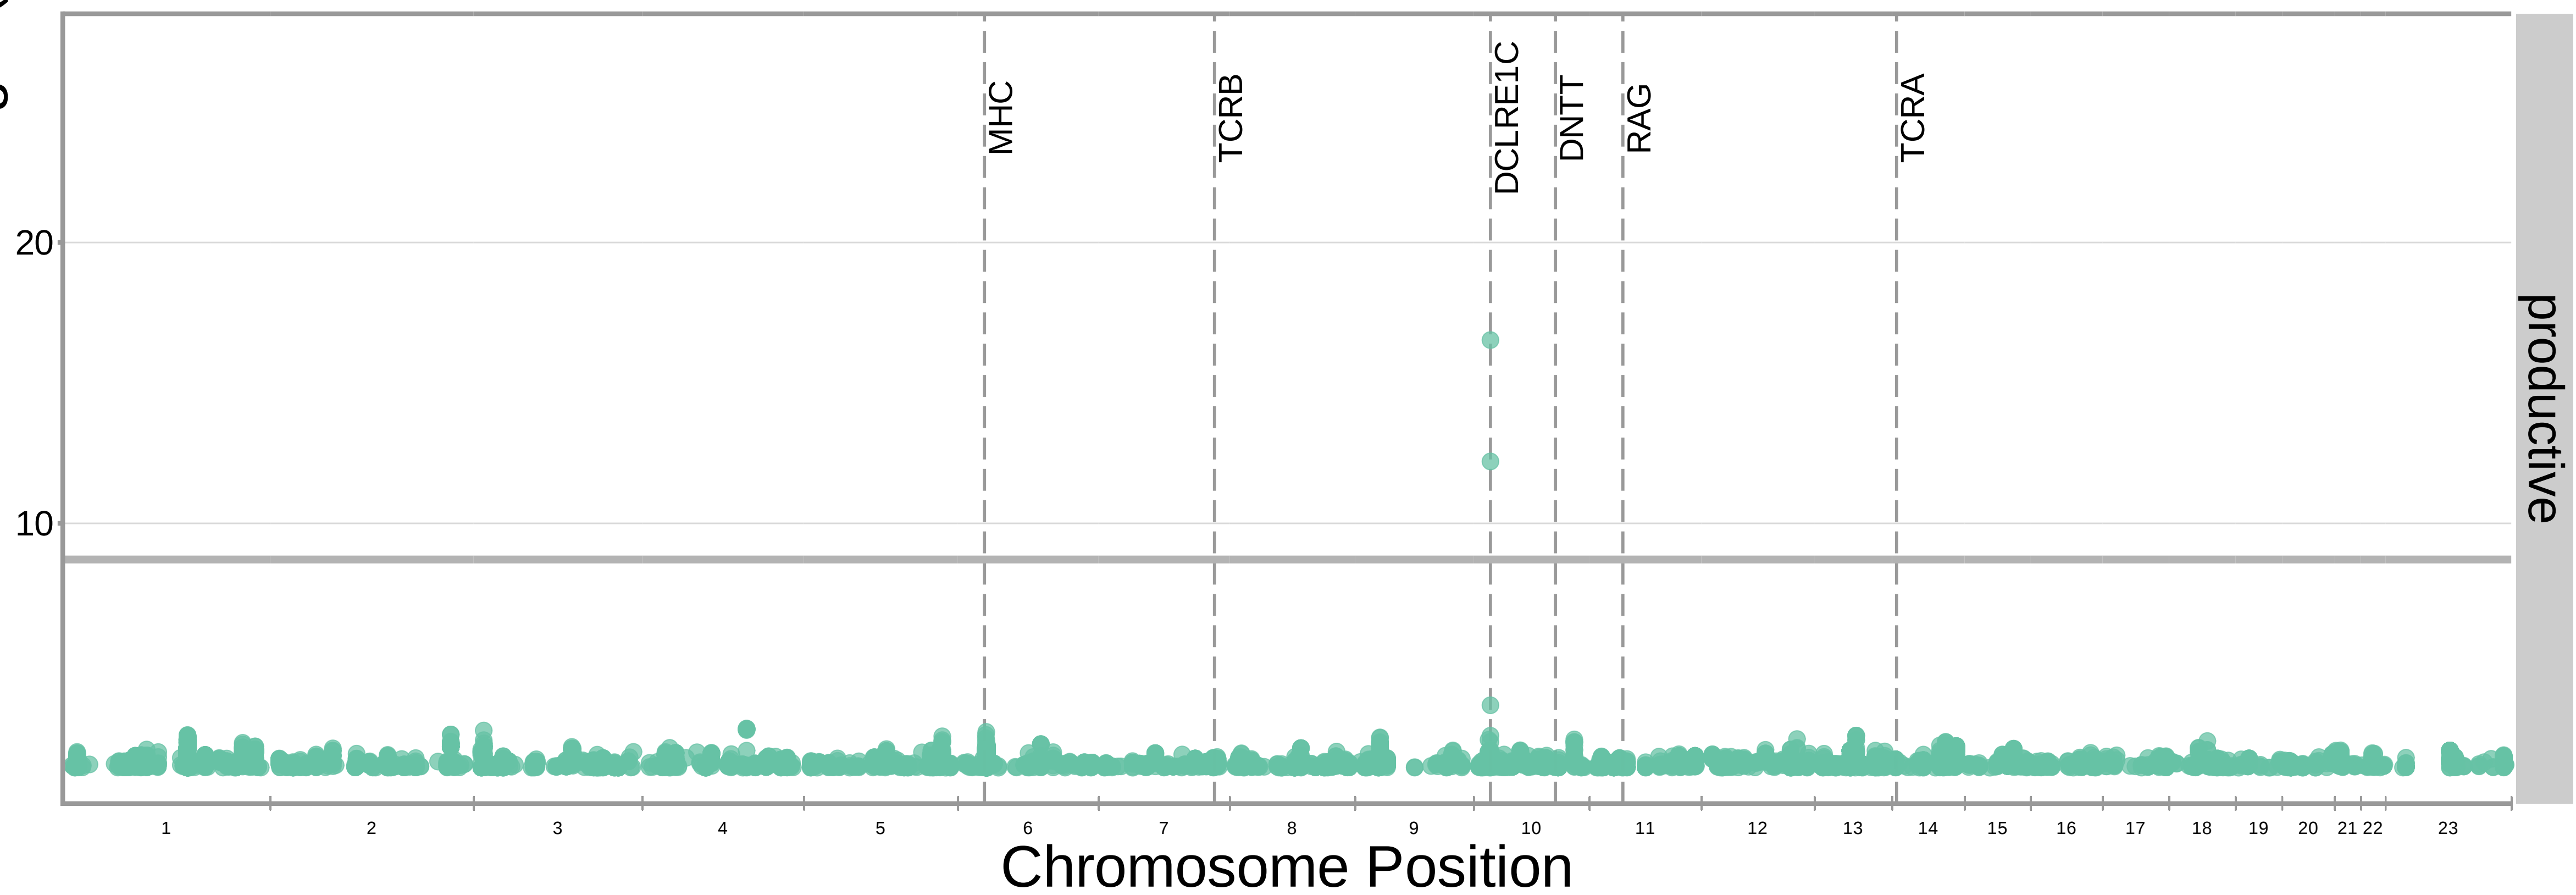

● 5'-end D-gene trimming

$-\log_{10}(\text{p-value})$

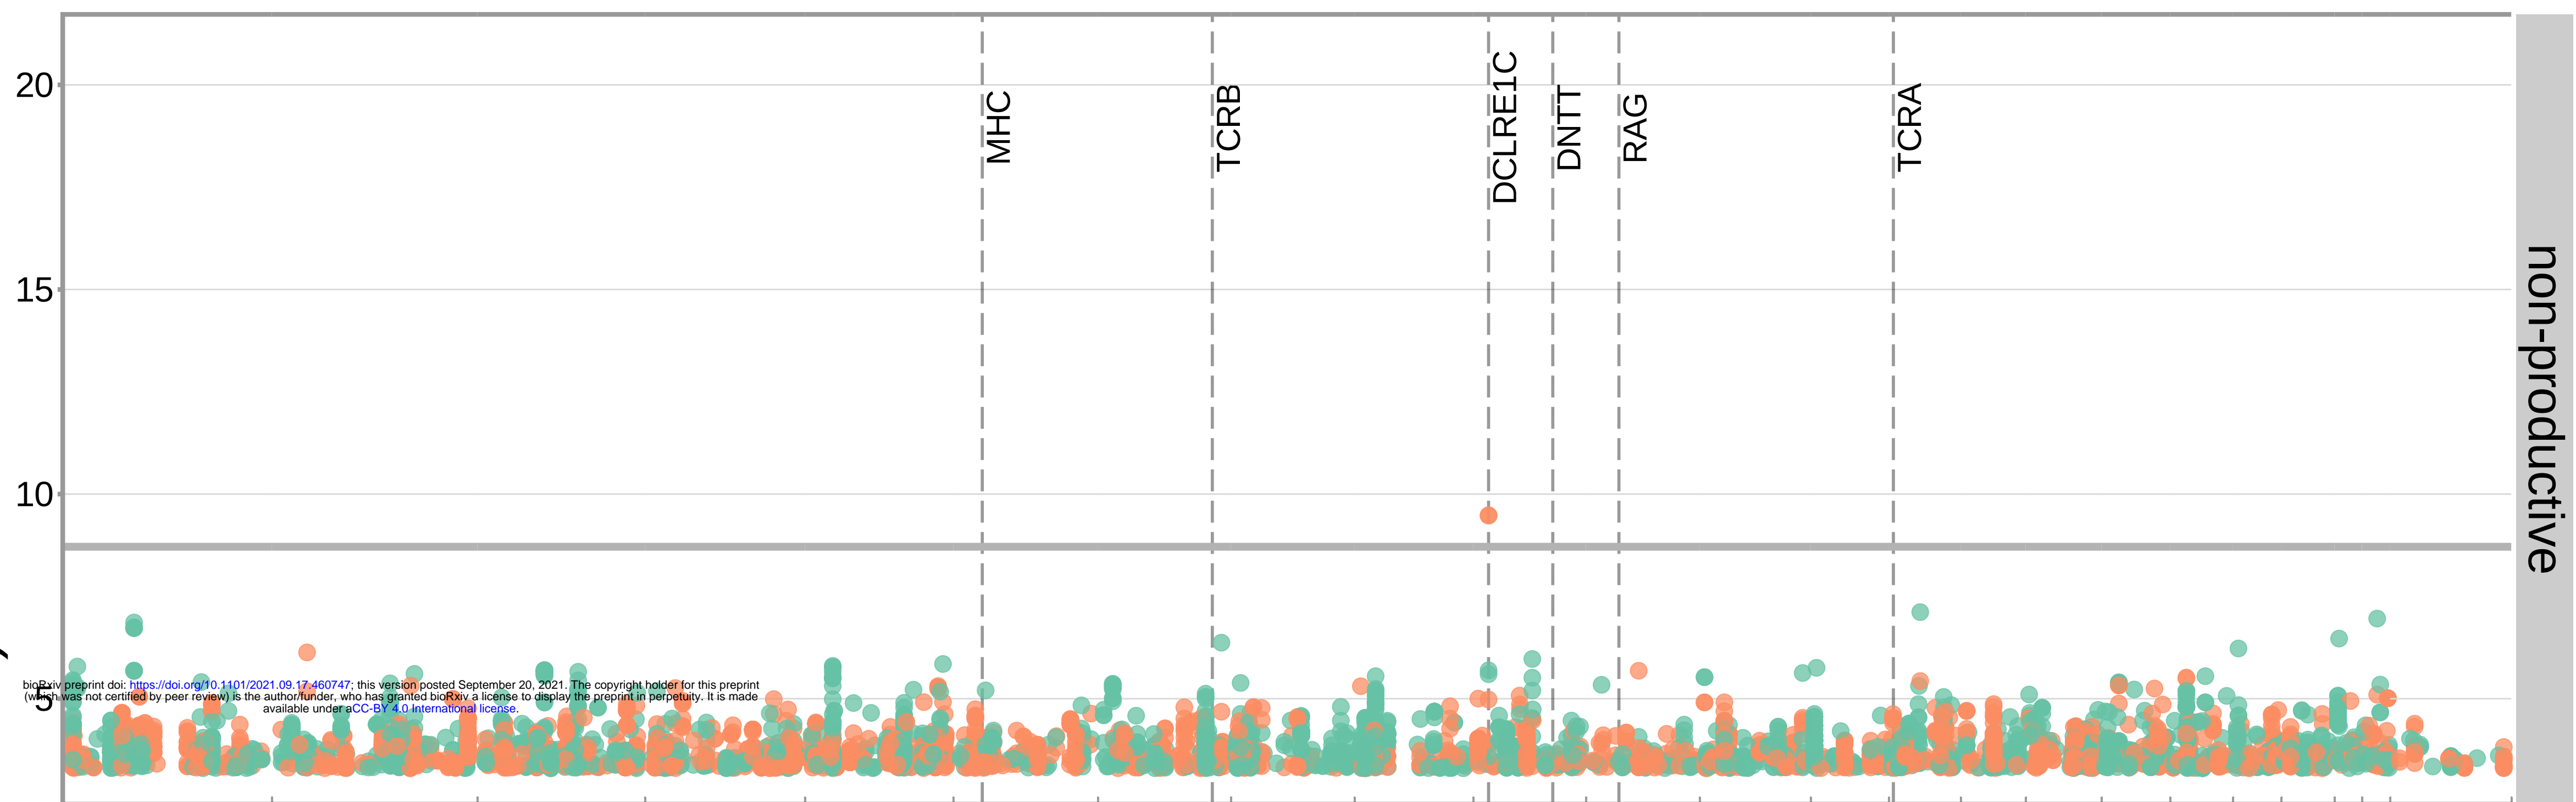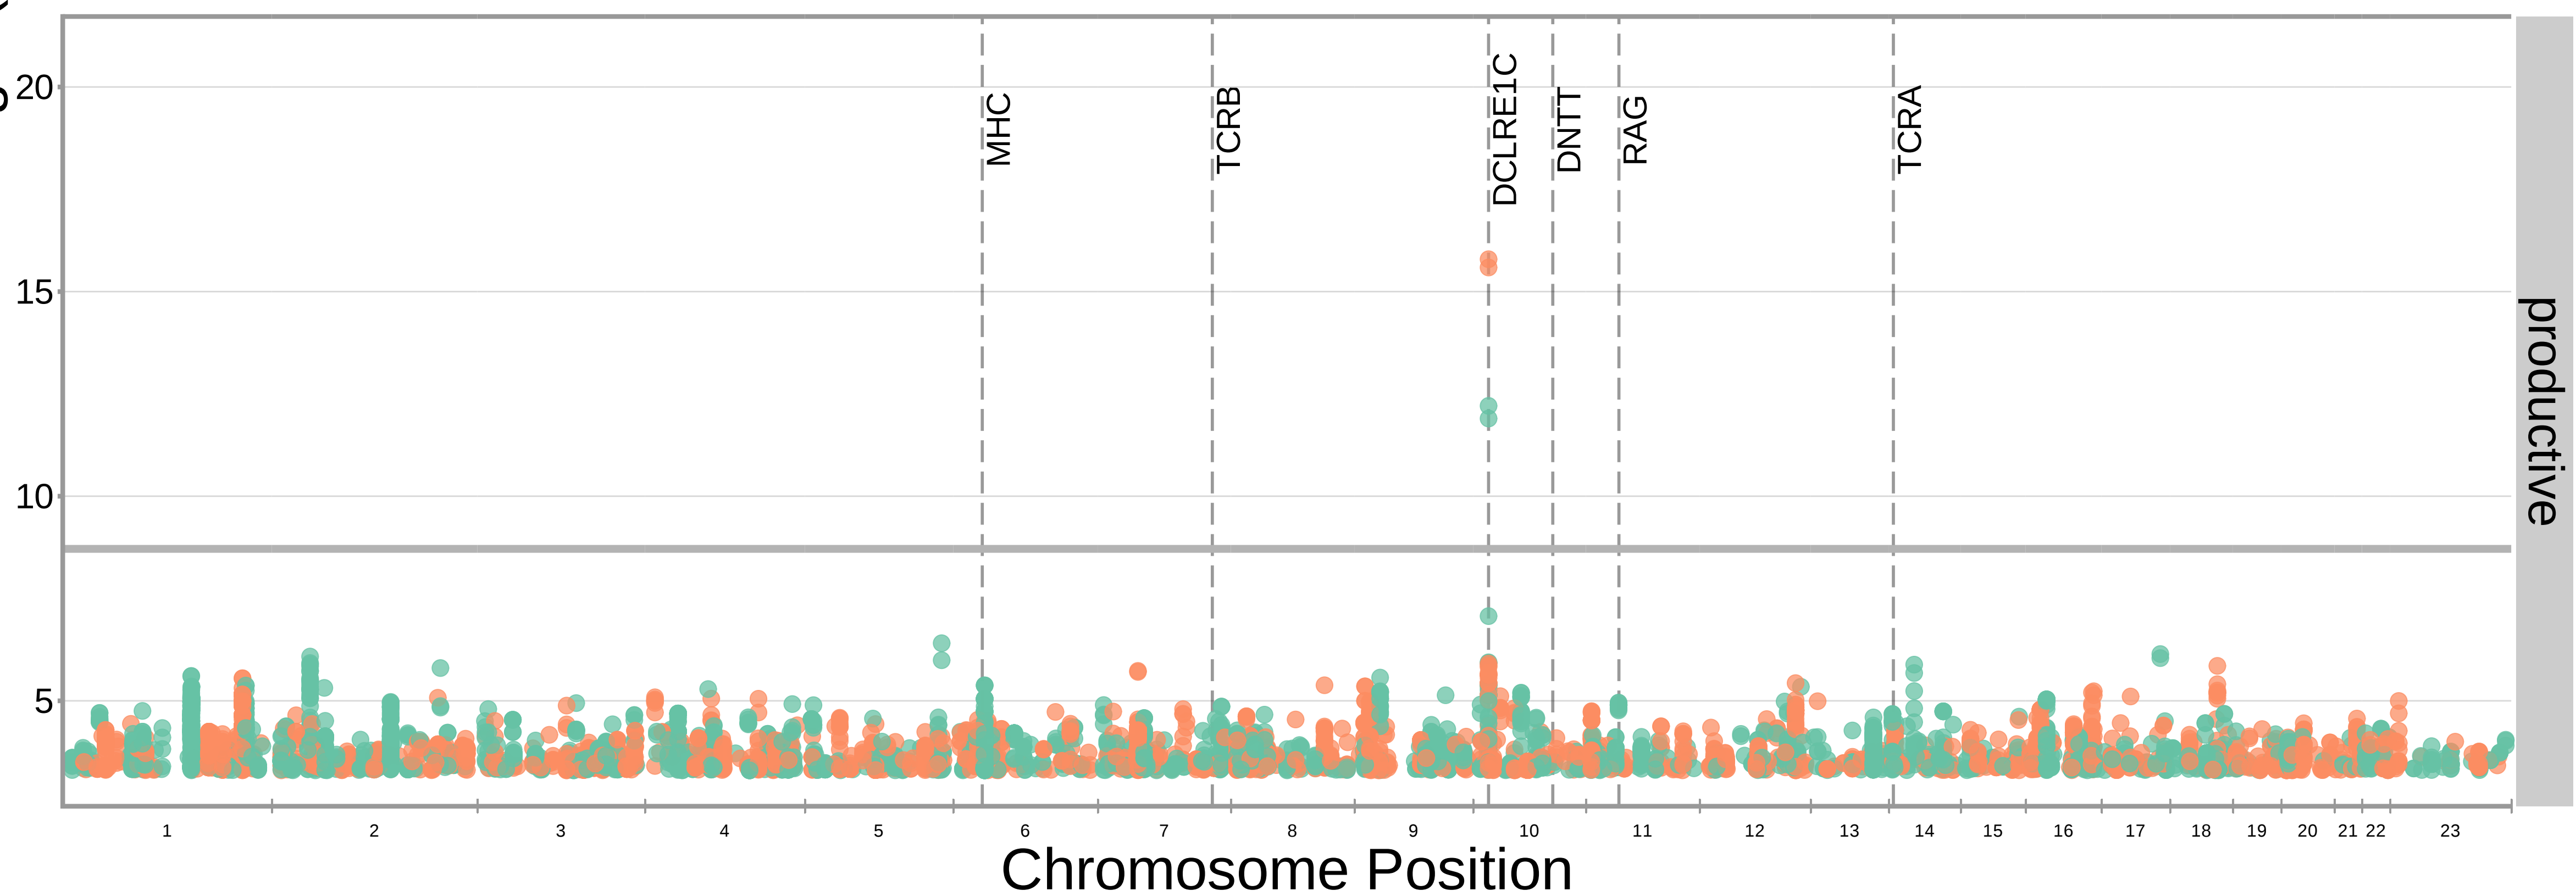

● 5'-end D-gene trimming ● 3'-end D-gene trimming

Cumulative probability

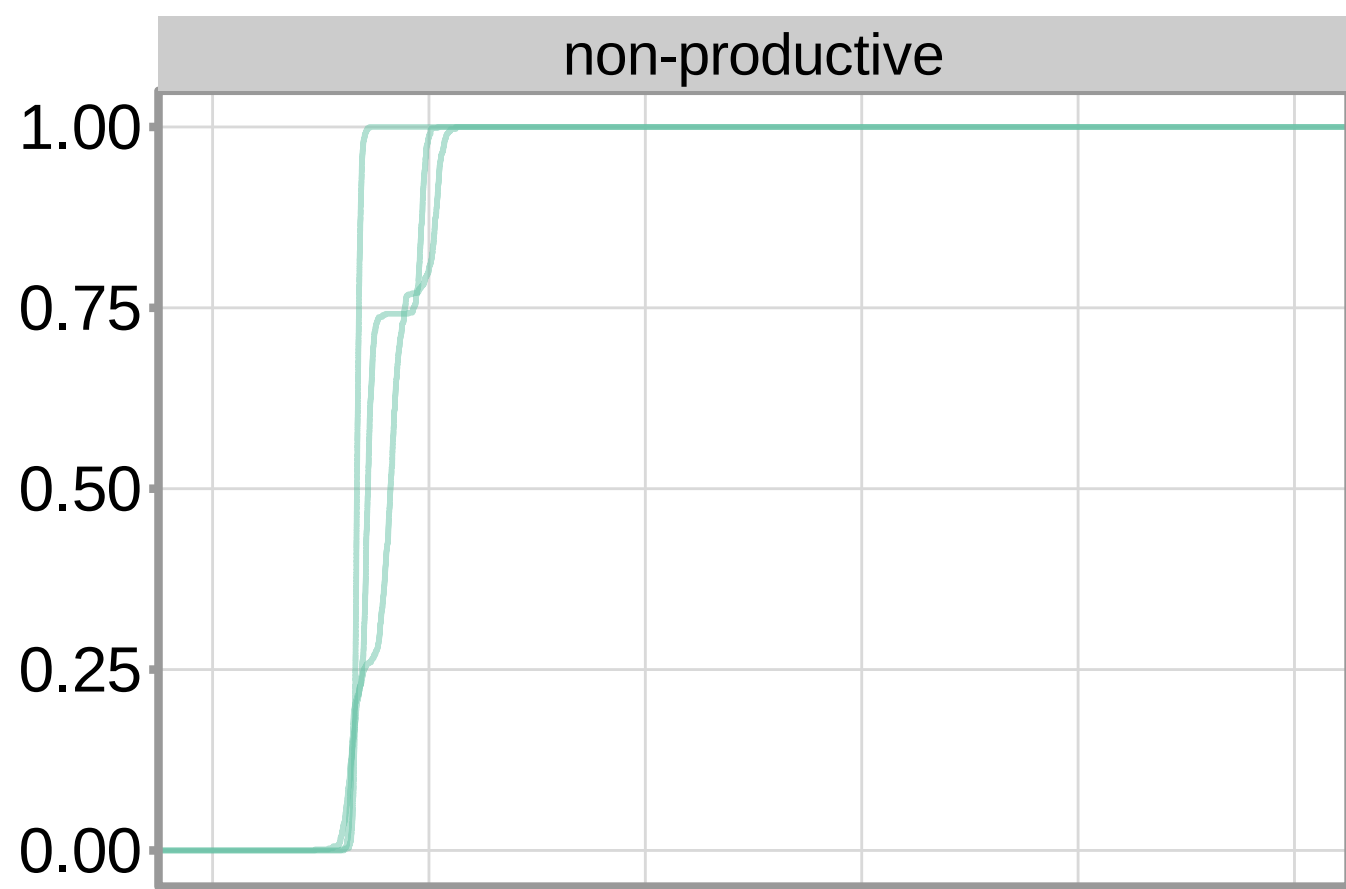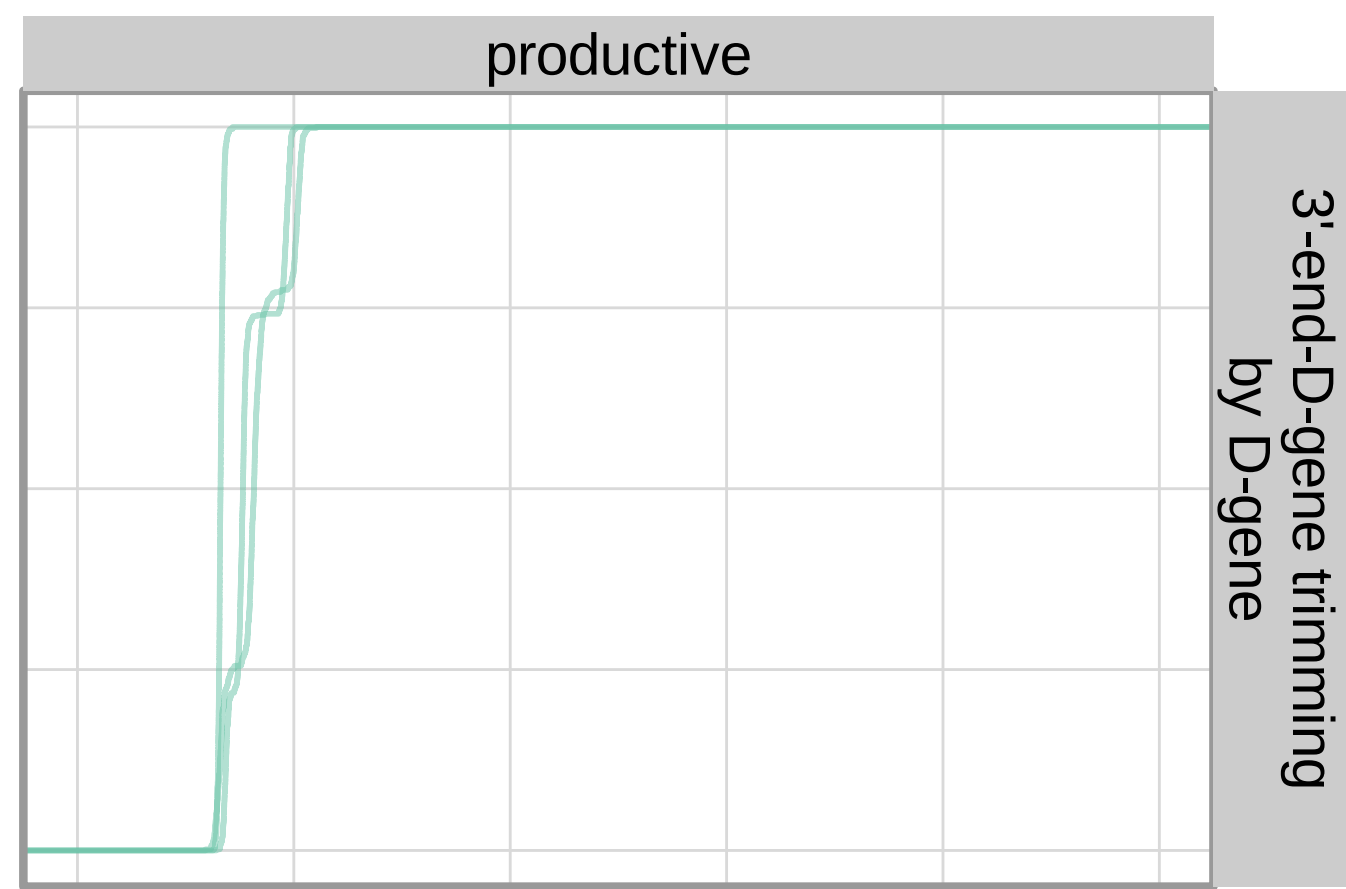

3'-end-D-gene trimming  
by D-gene

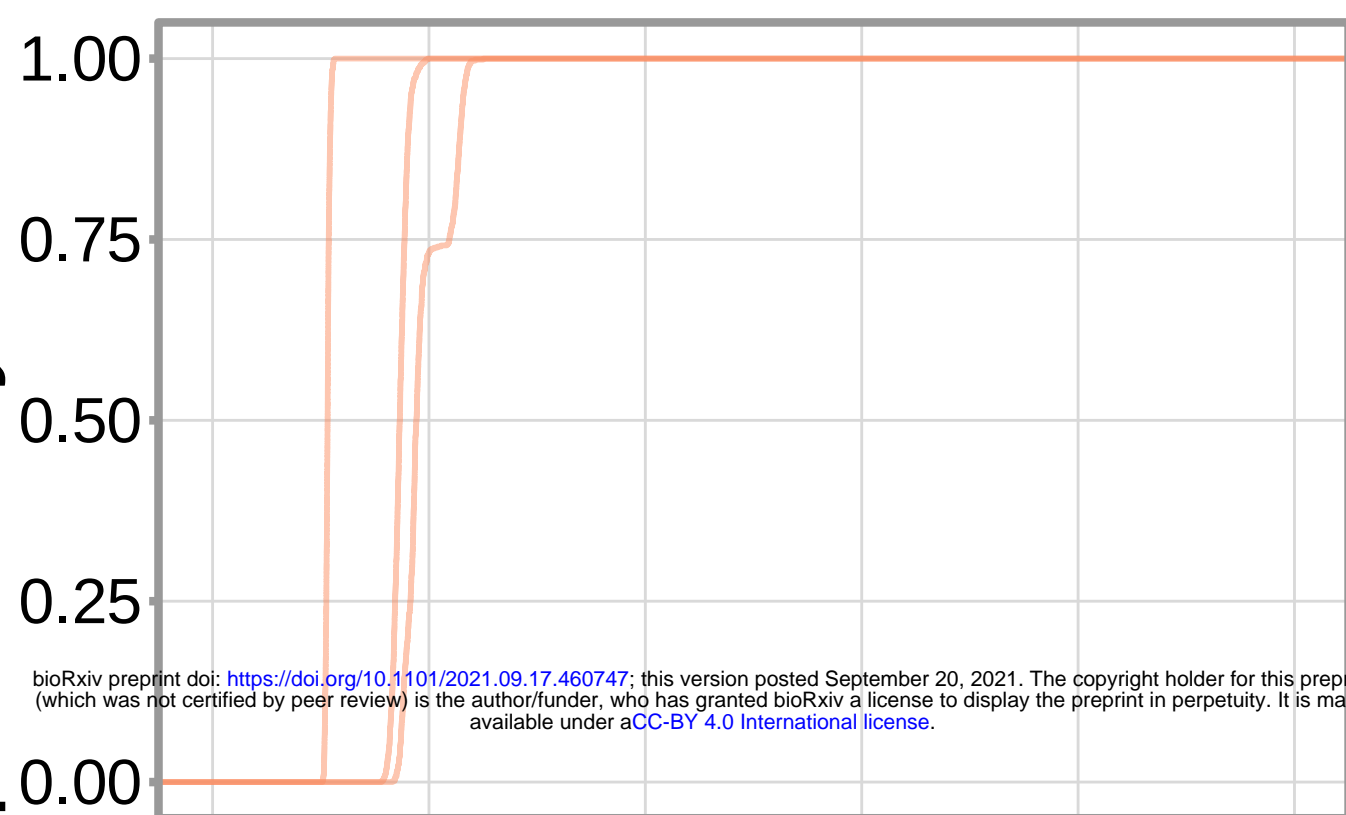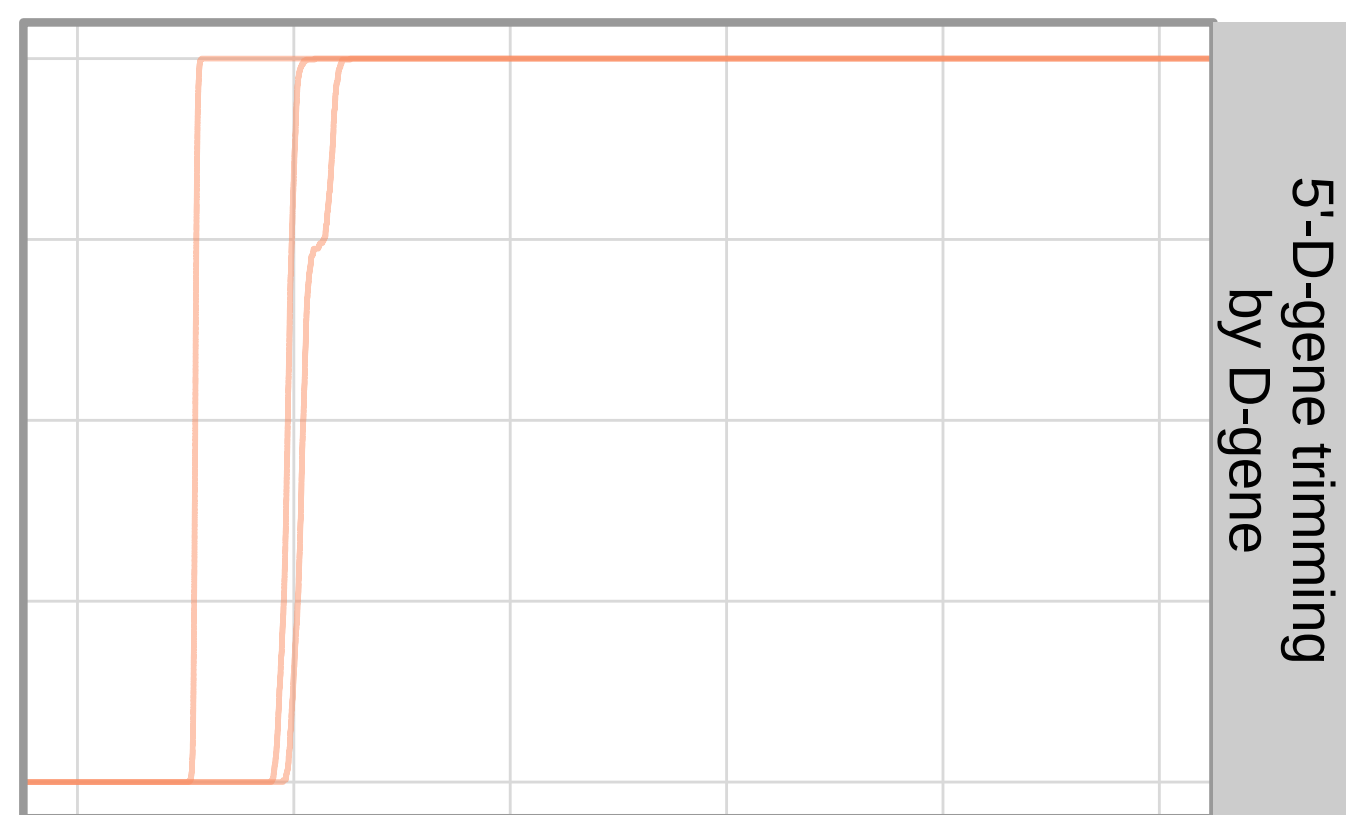

5'-D-gene trimming  
by D-gene

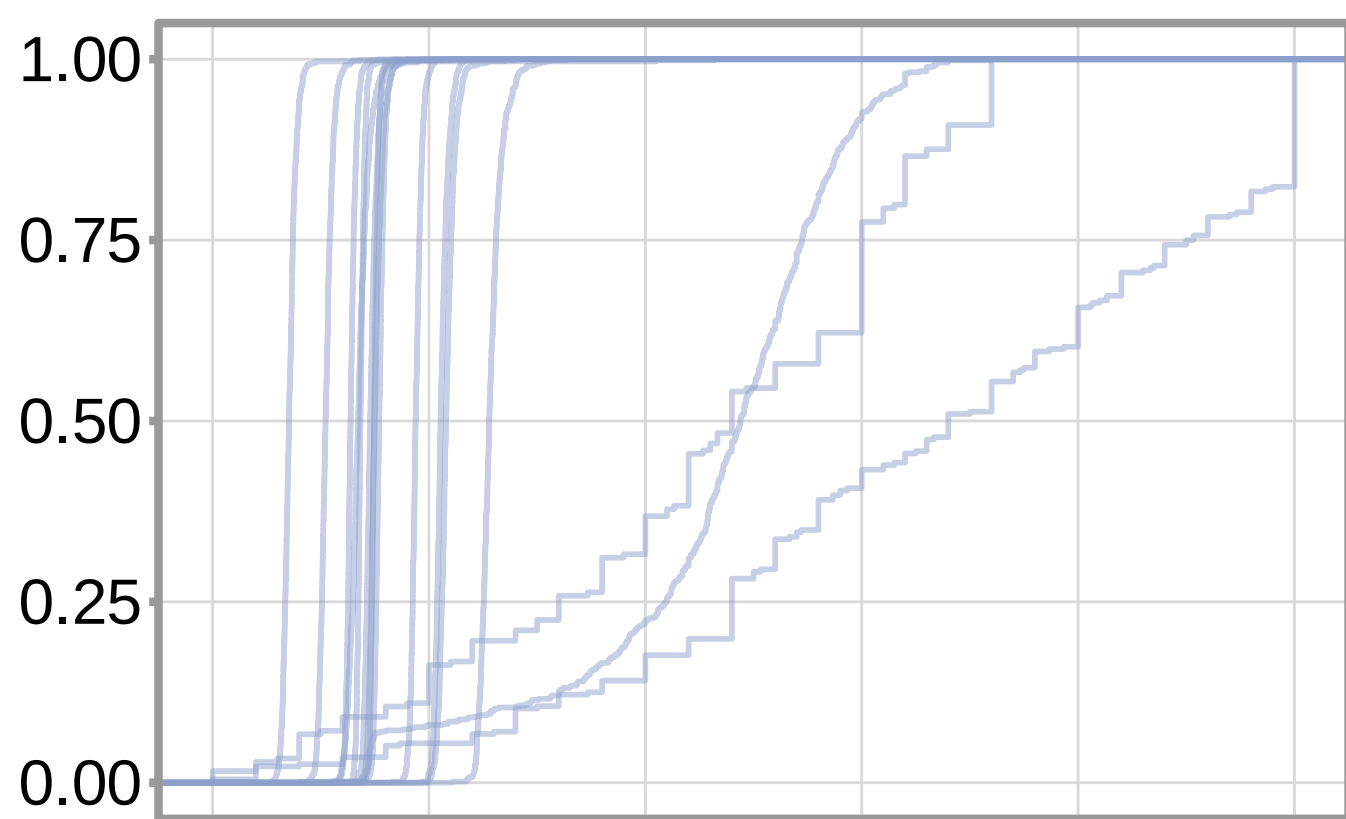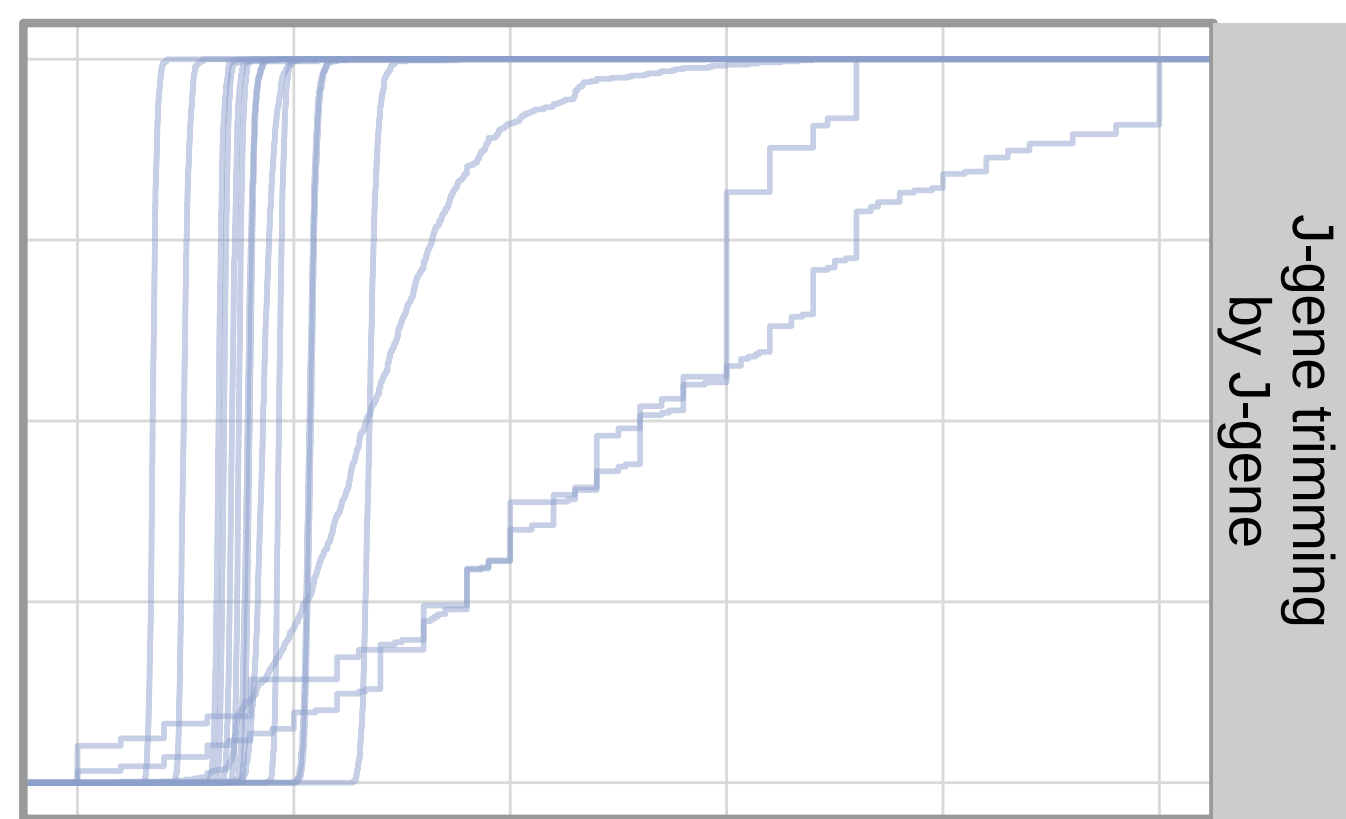

J-gene trimming  
by J-gene

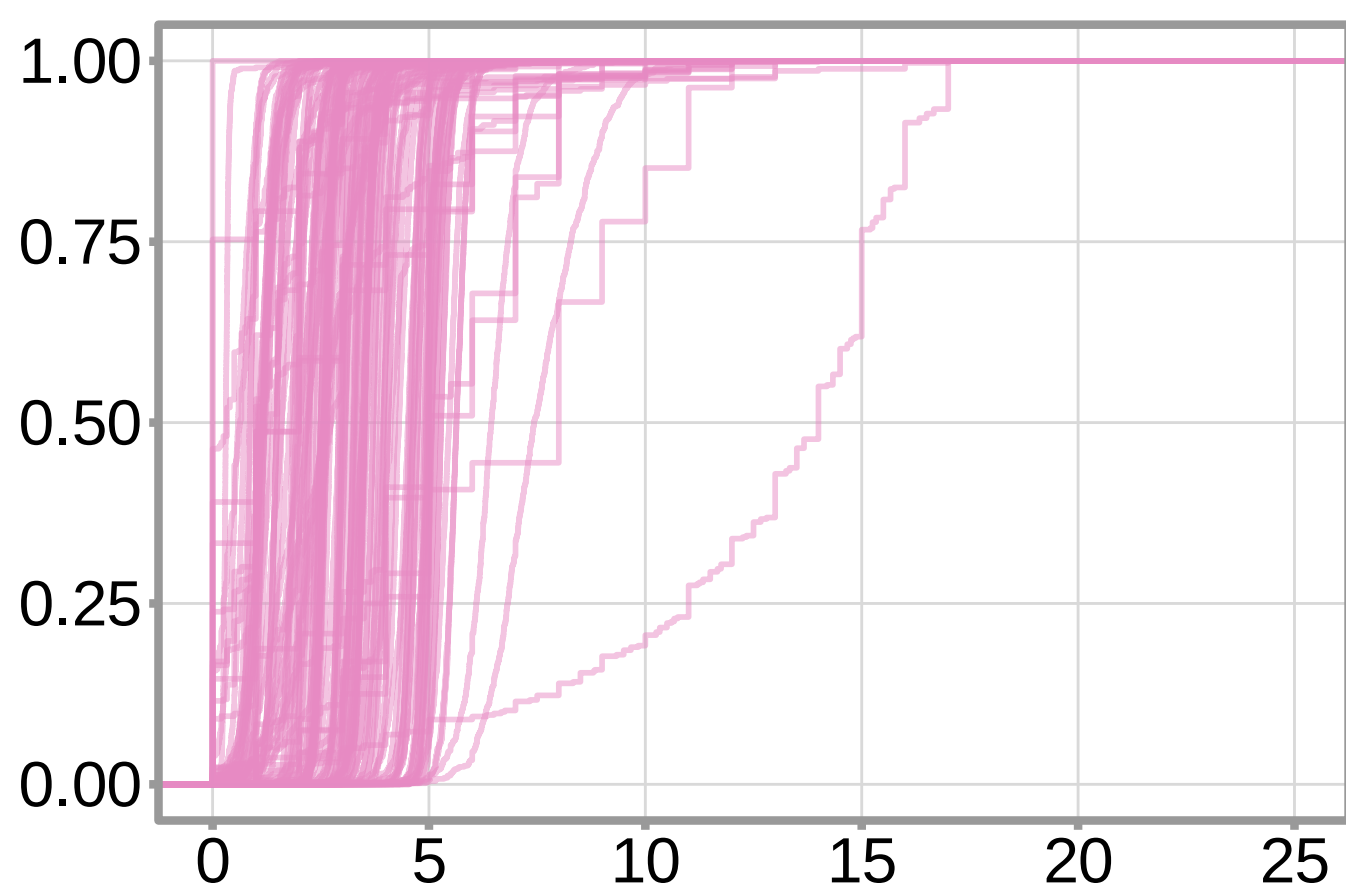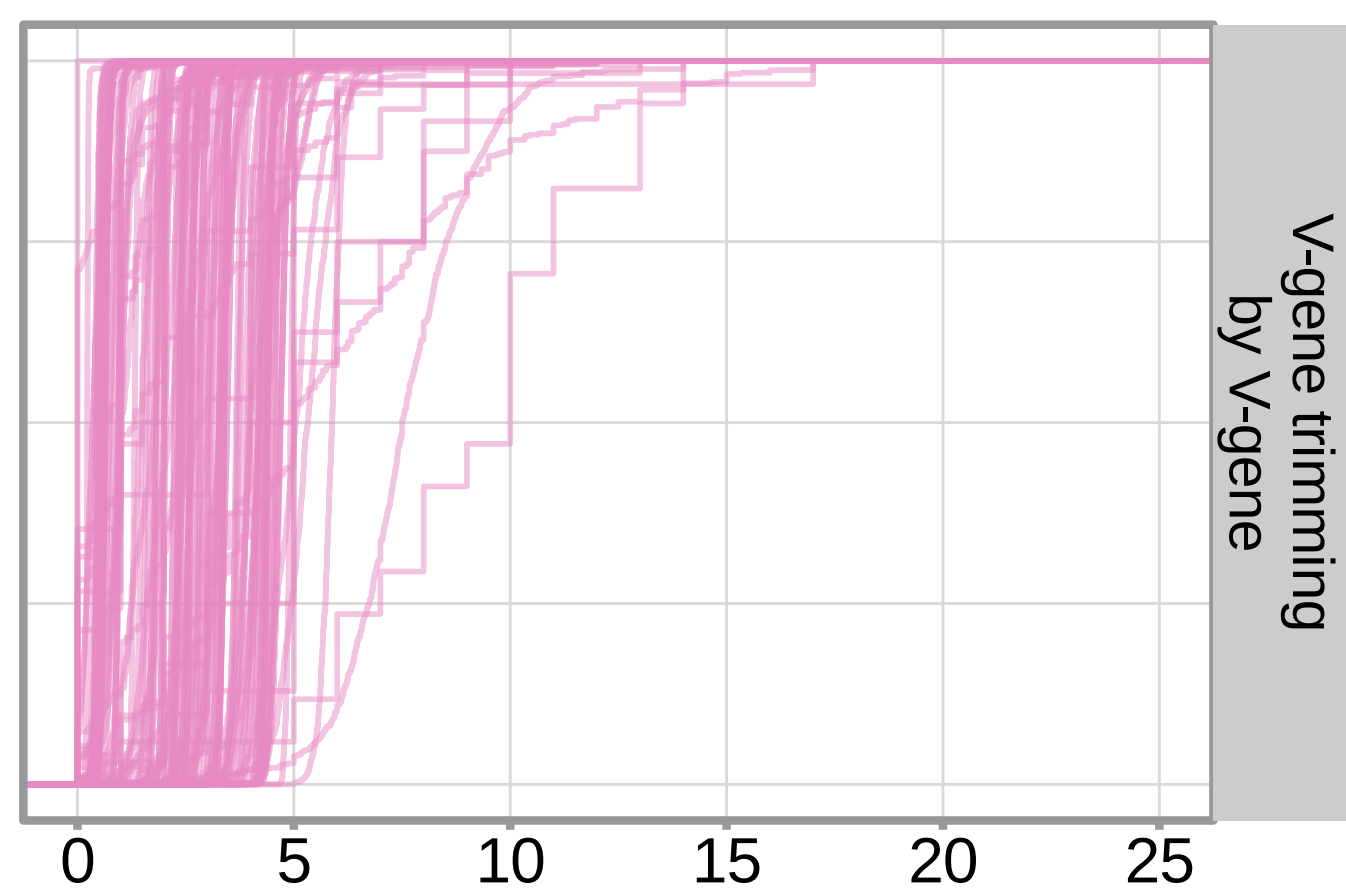

V-gene trimming  
by V-gene

Number of trimmed nucleotides



$-\log_{10}(\text{p-value})$

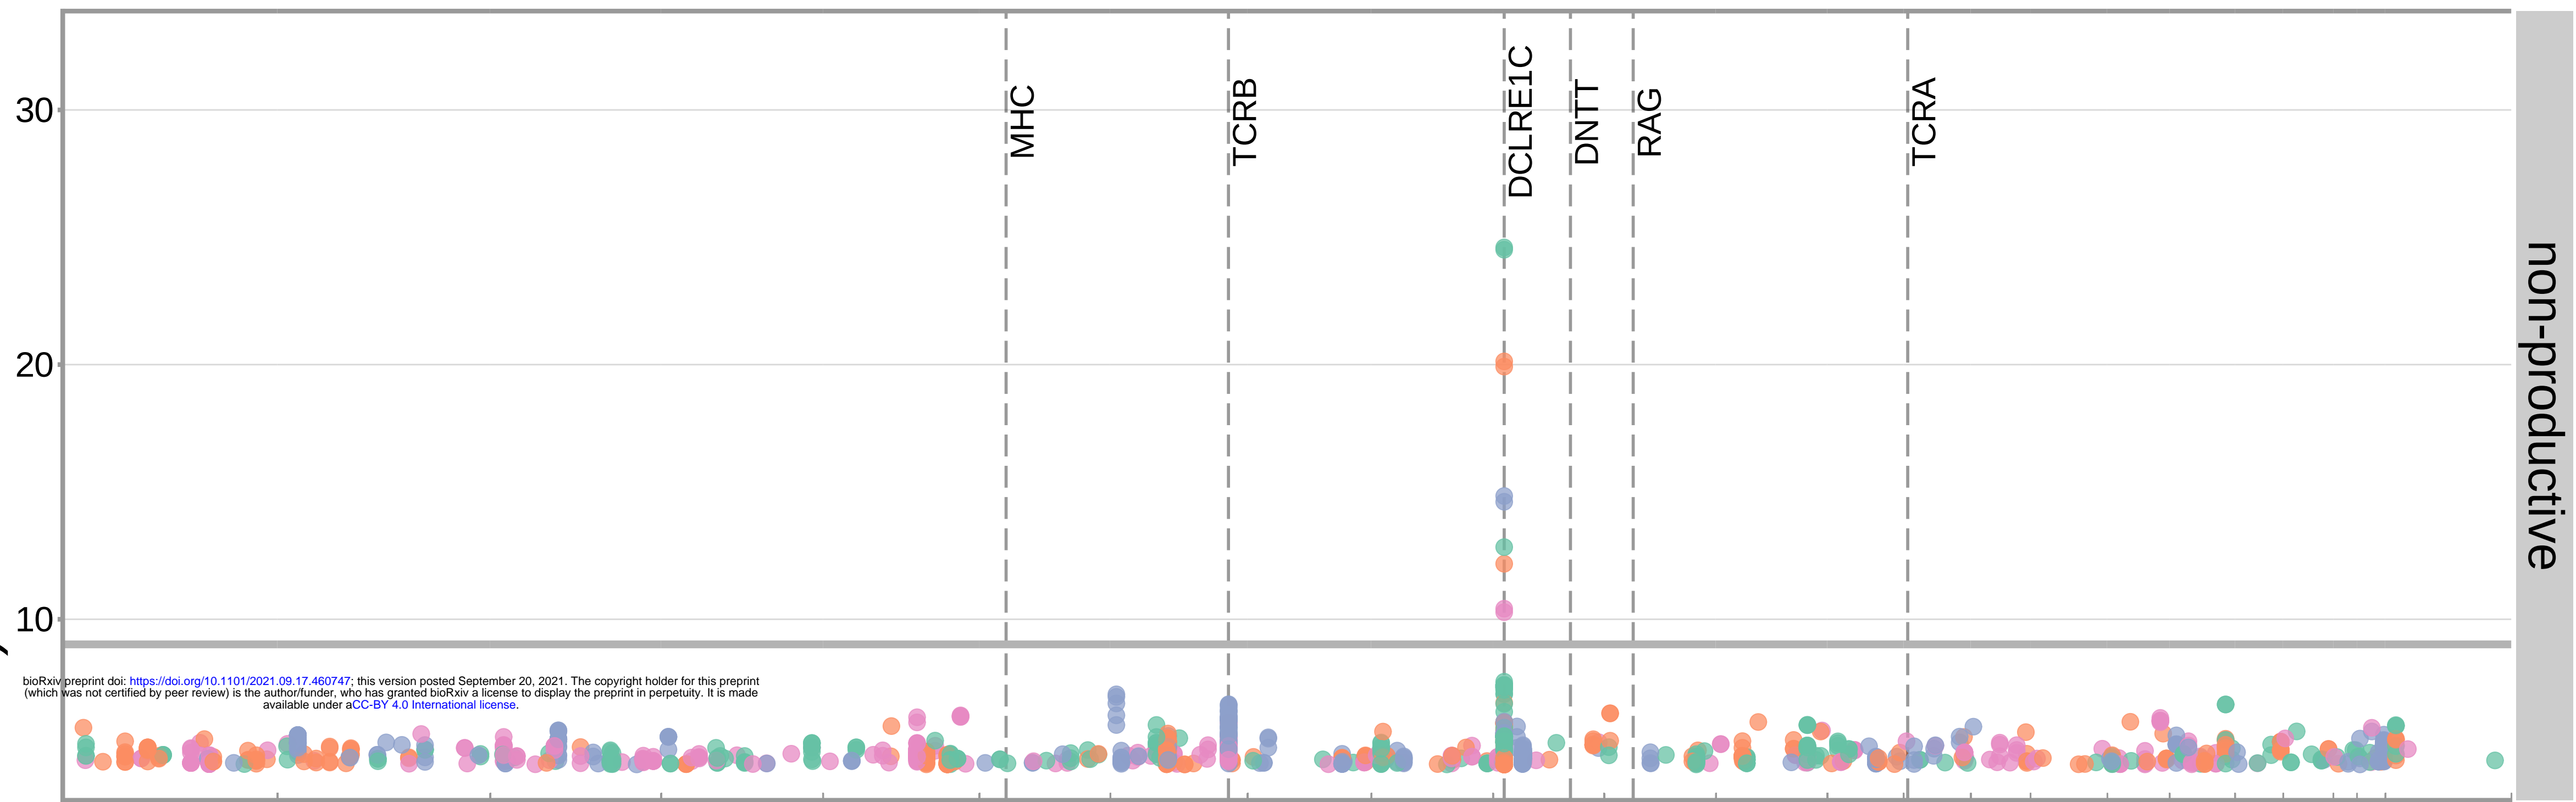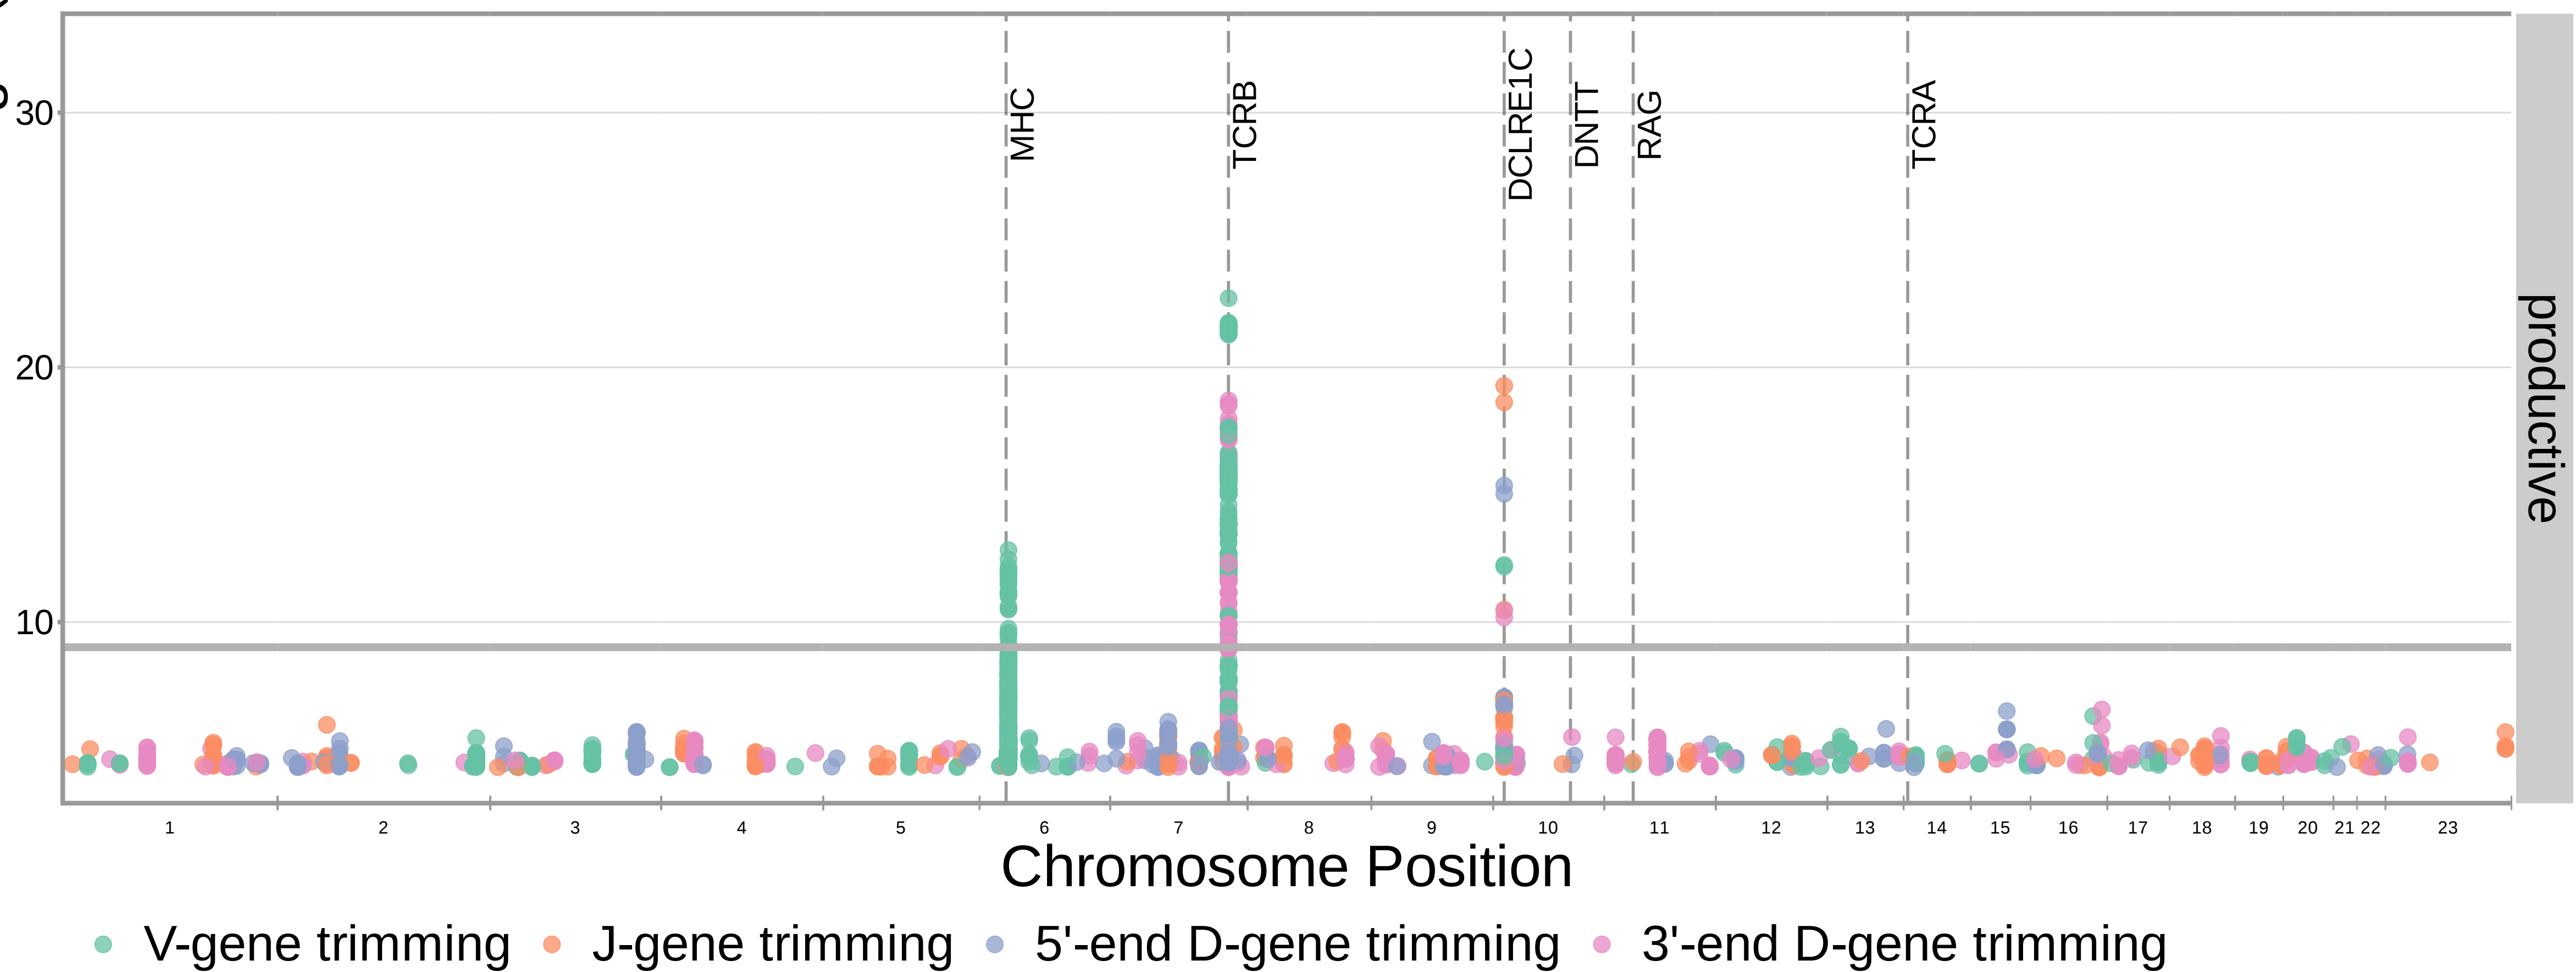

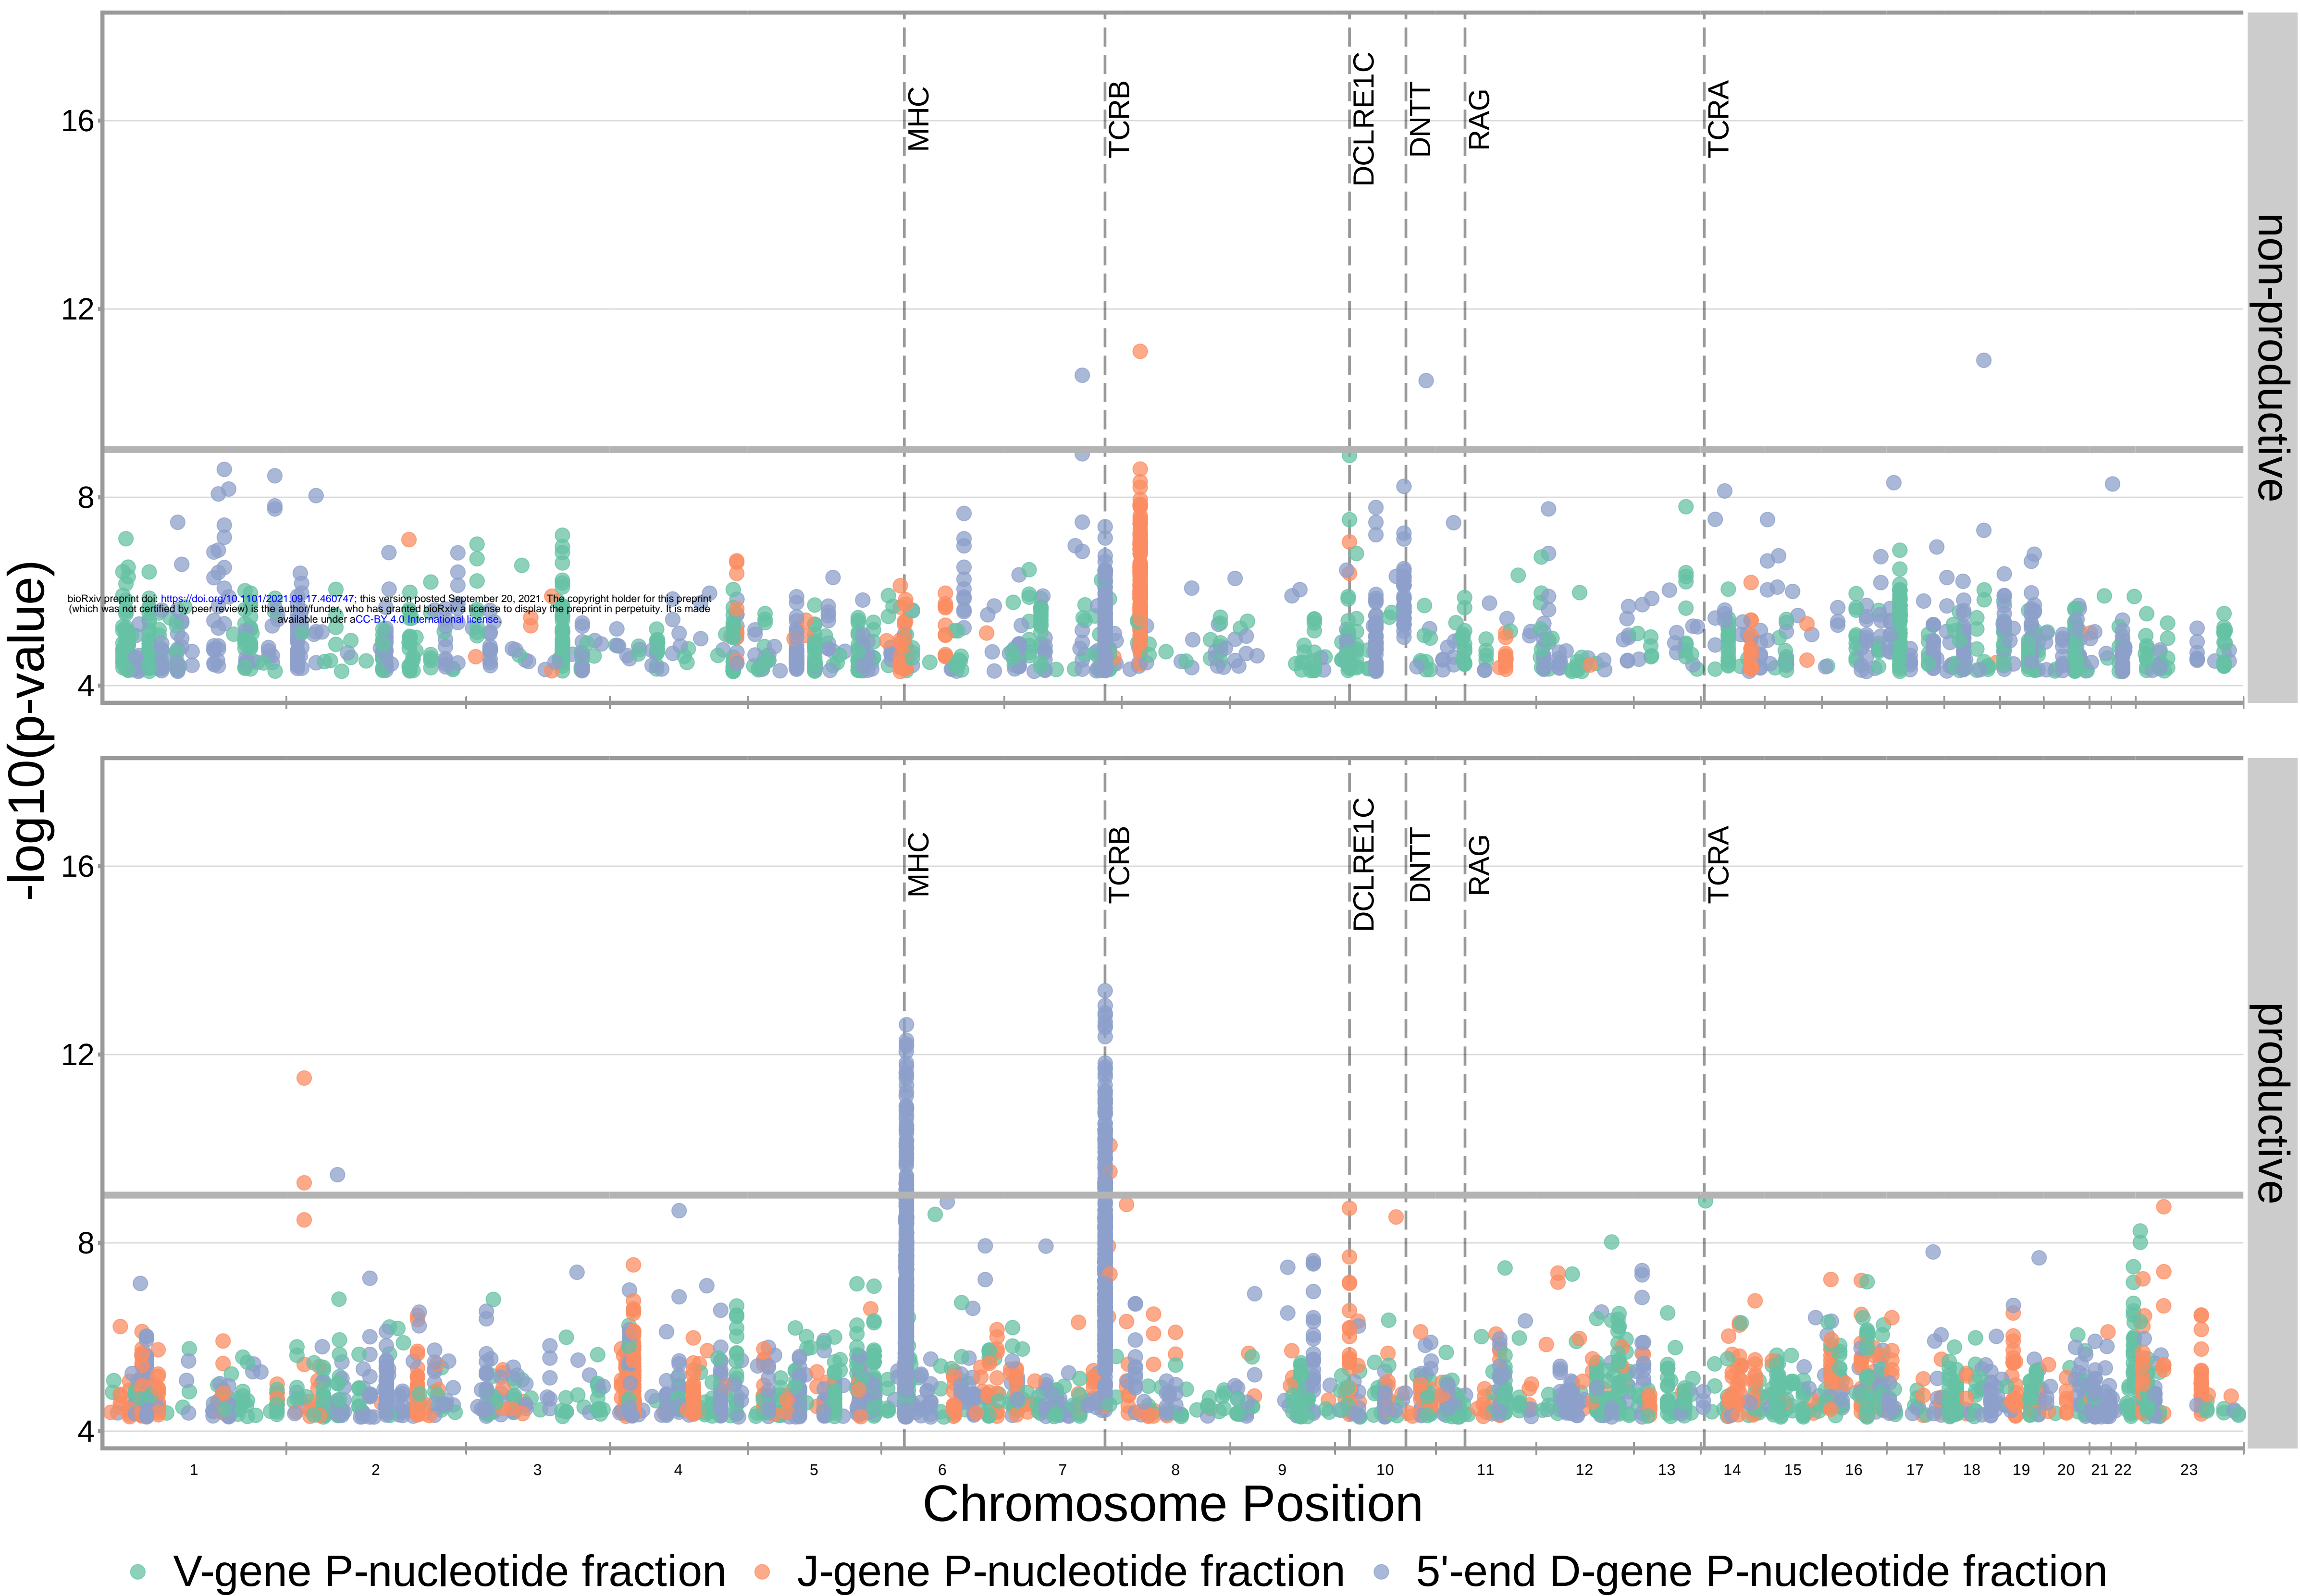



$-\log_{10}(\text{p-value})$

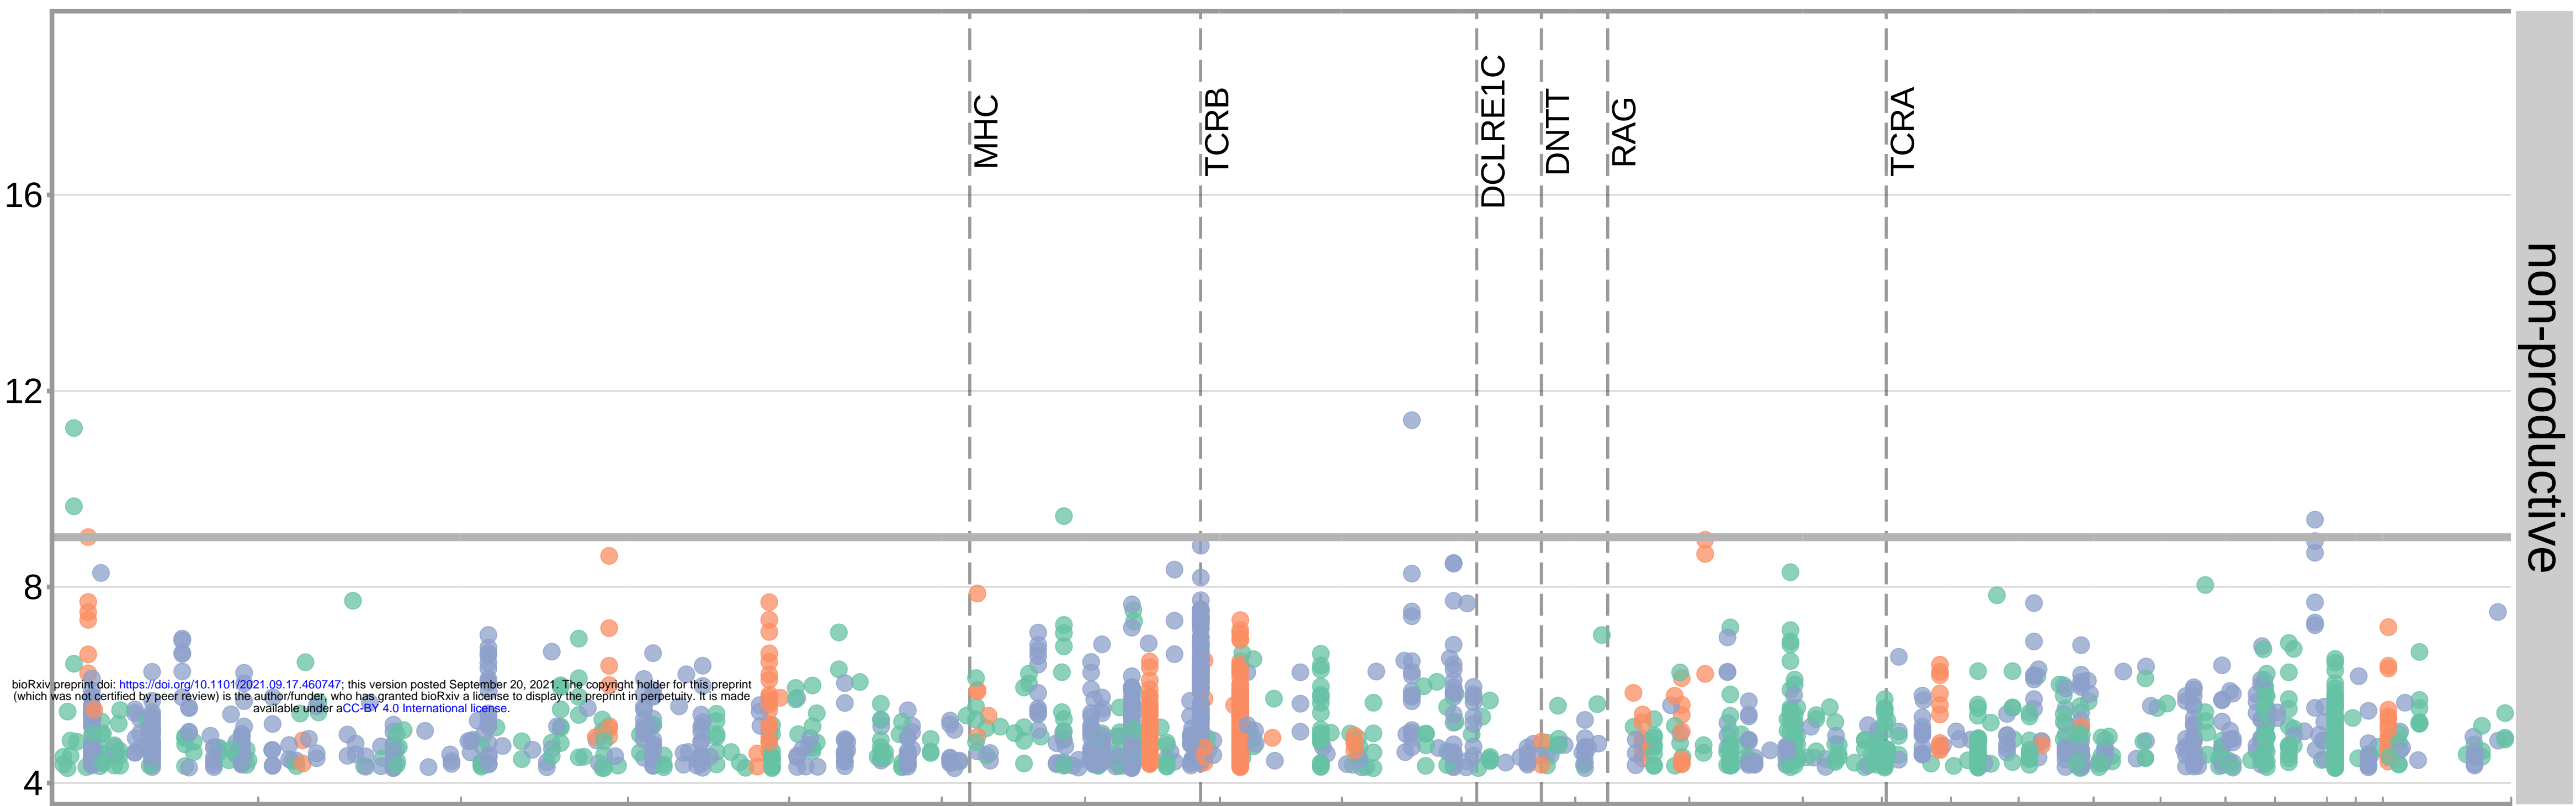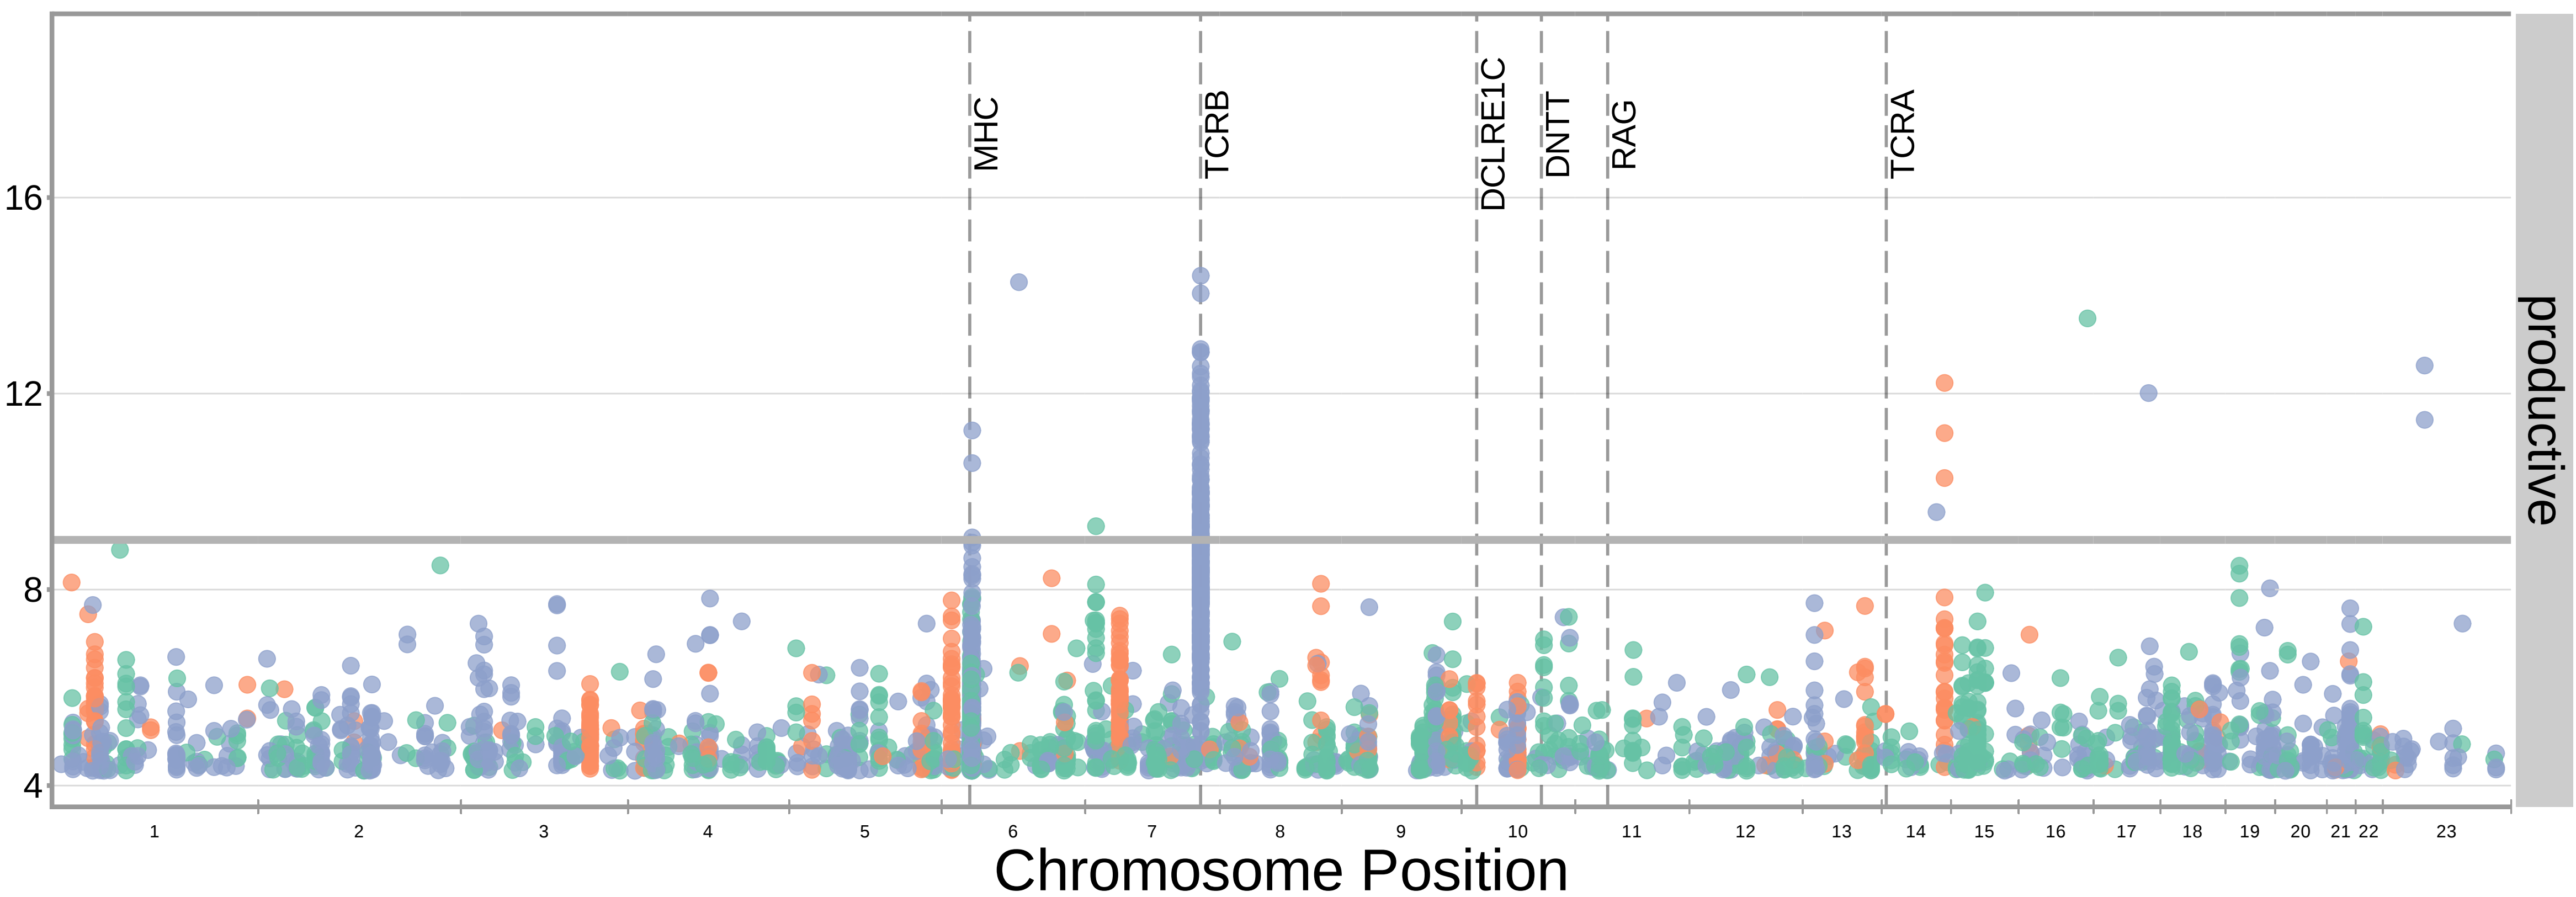

● V-gene P-nucleotides ● J-gene P-nucleotides ● 5'-end D-gene P-nucleotides

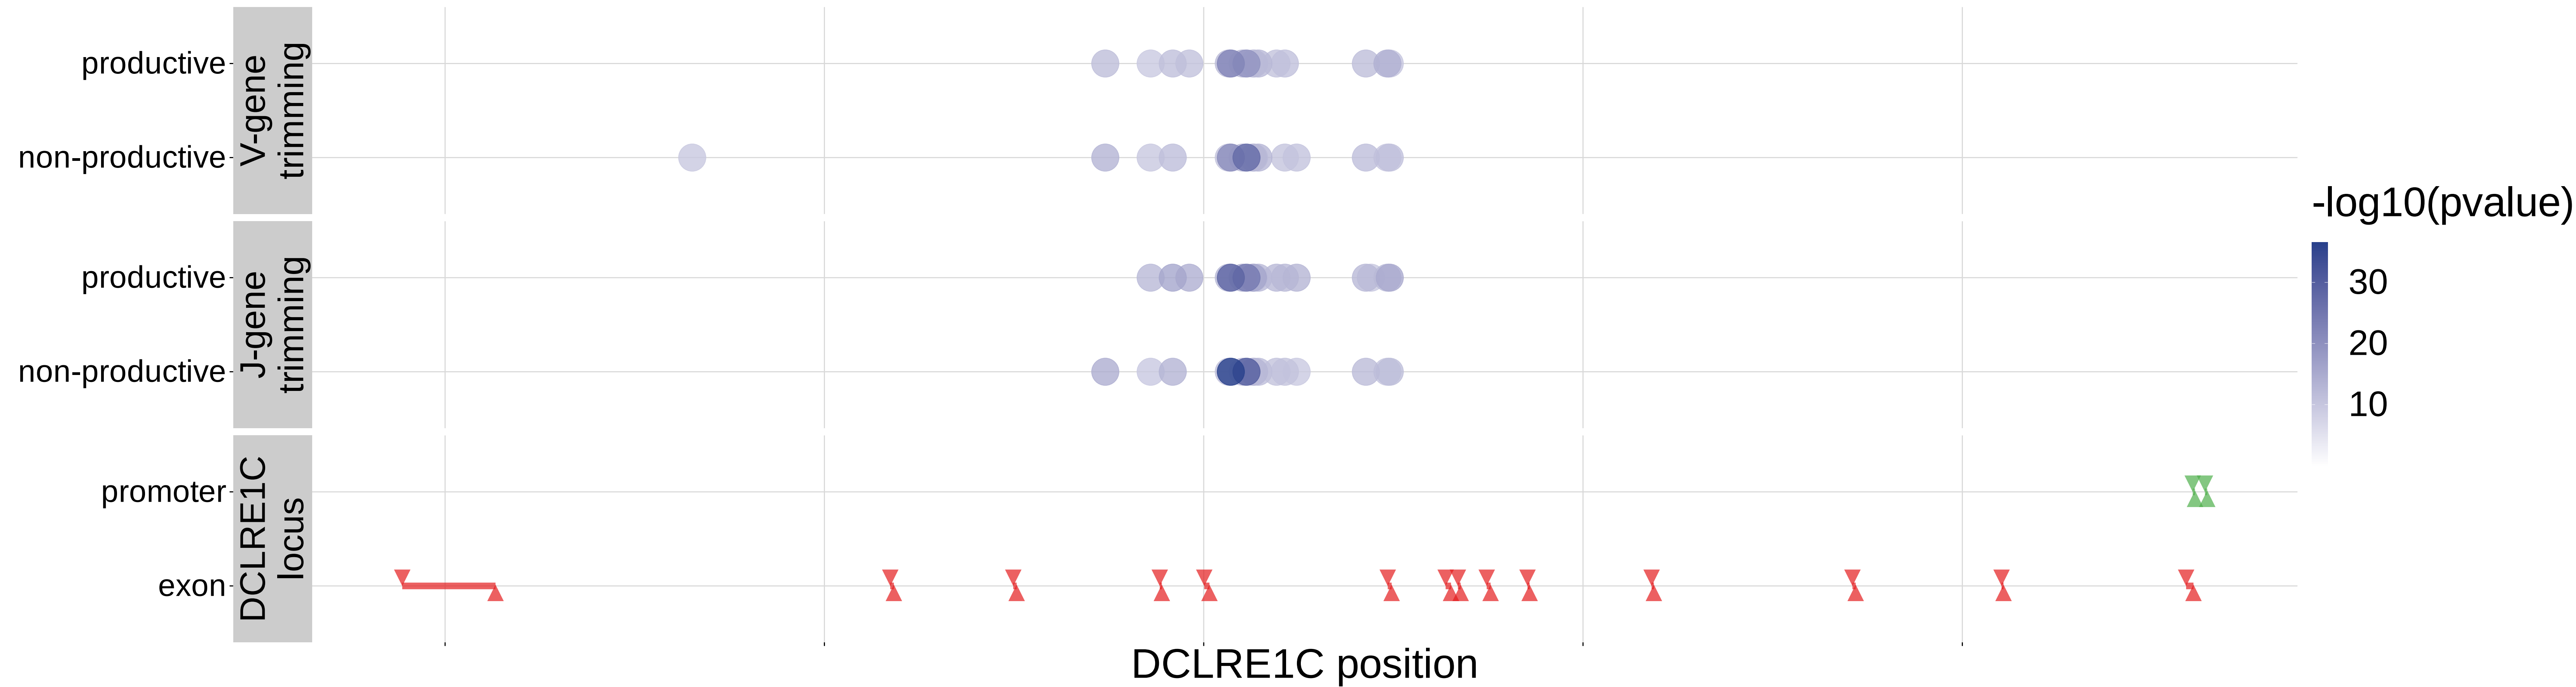

Number of J-gene nucleotides deleted

non-productive

productive

4.00  
3.75  
3.50

AA

CA

CC

AA

CA

CC

rs41298872 SNP genotype

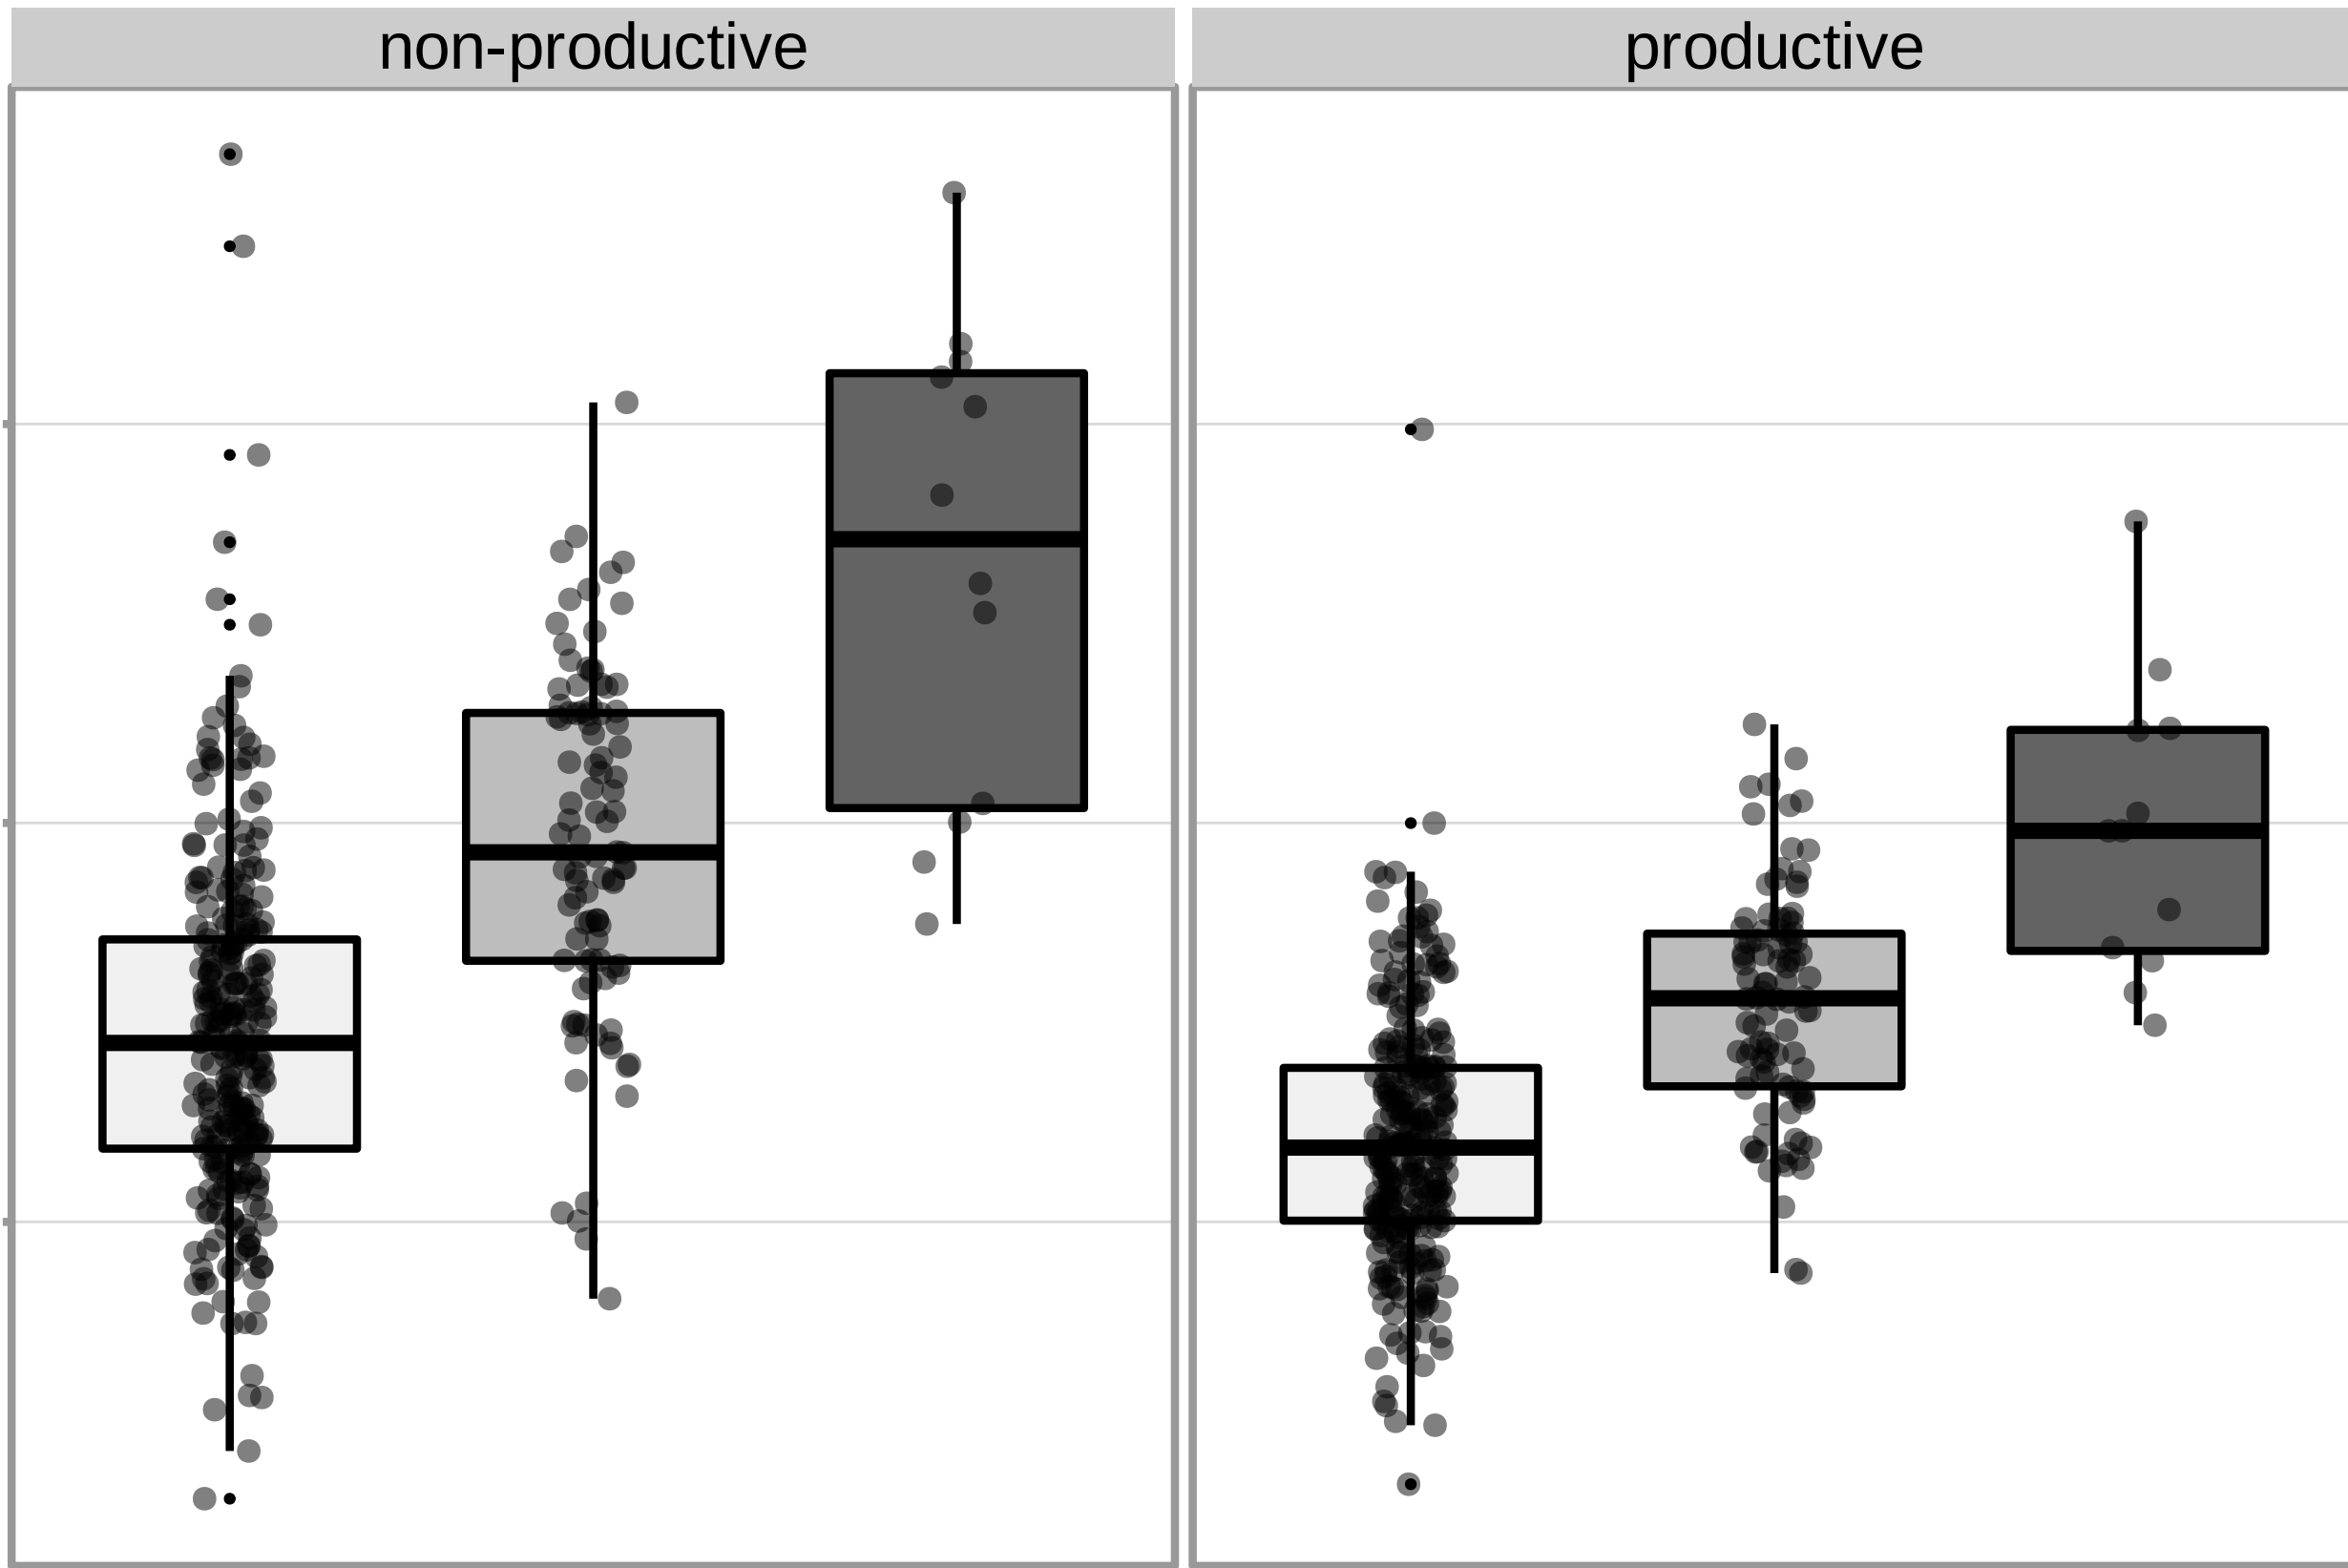



**A**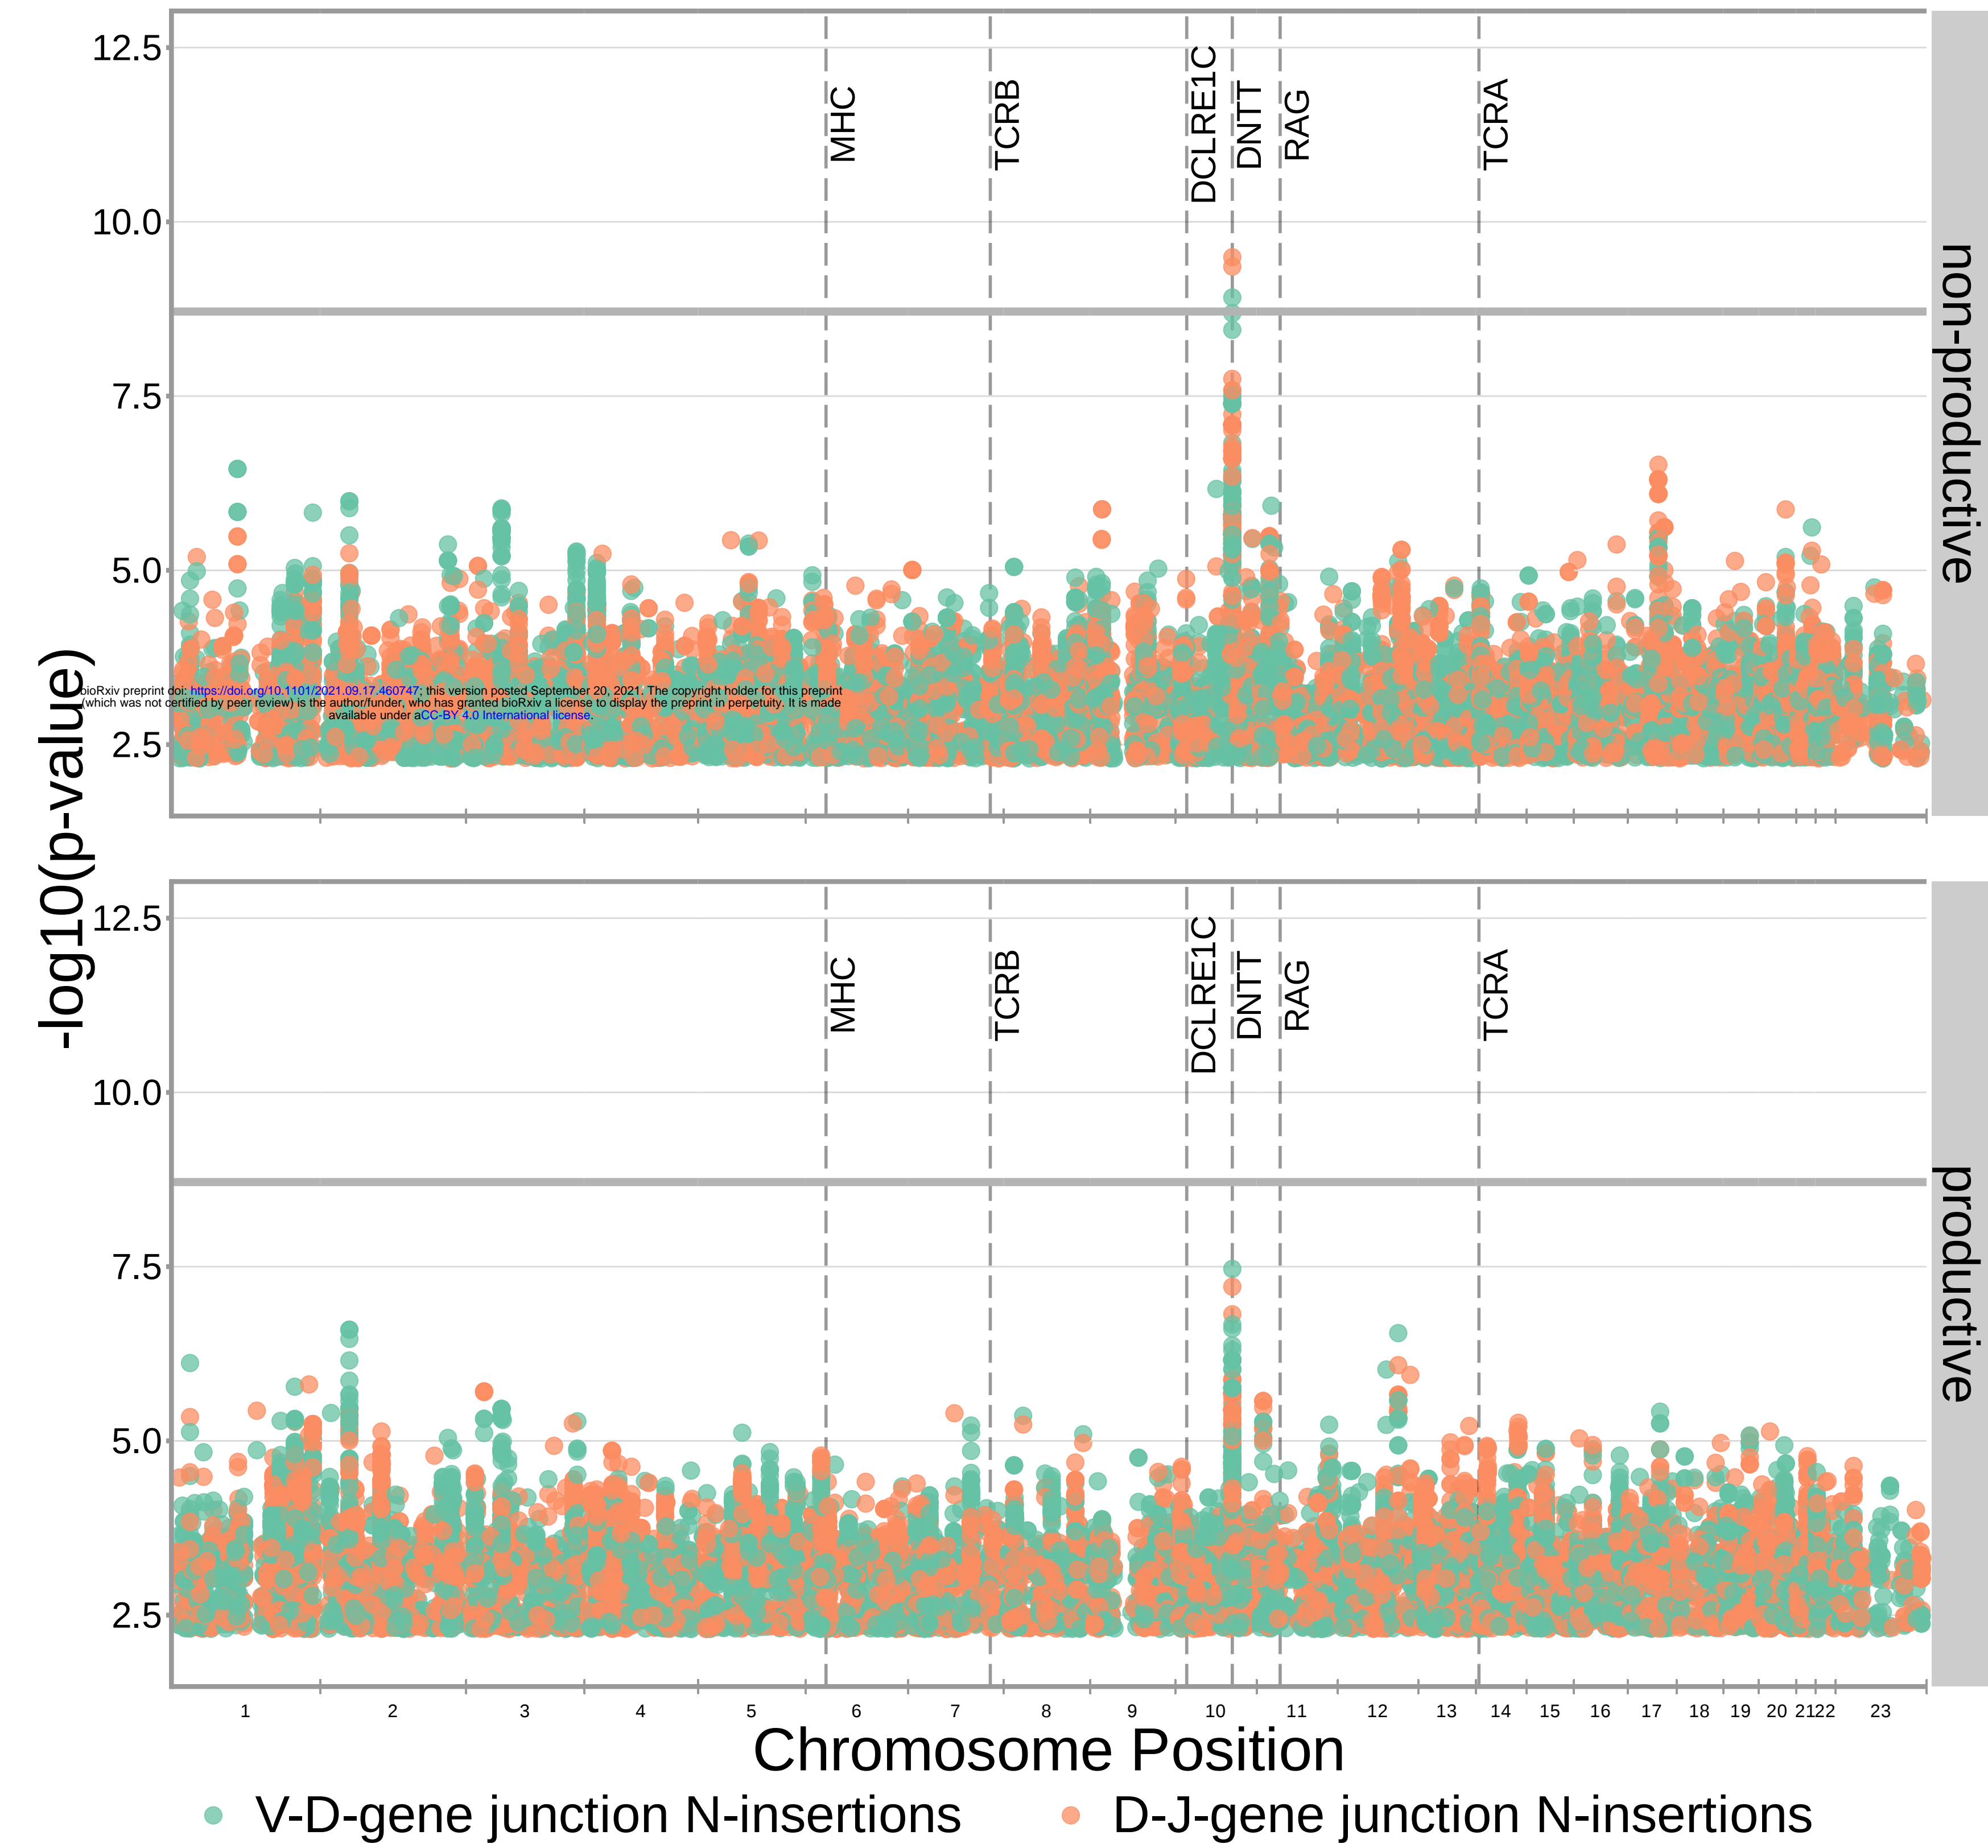**B**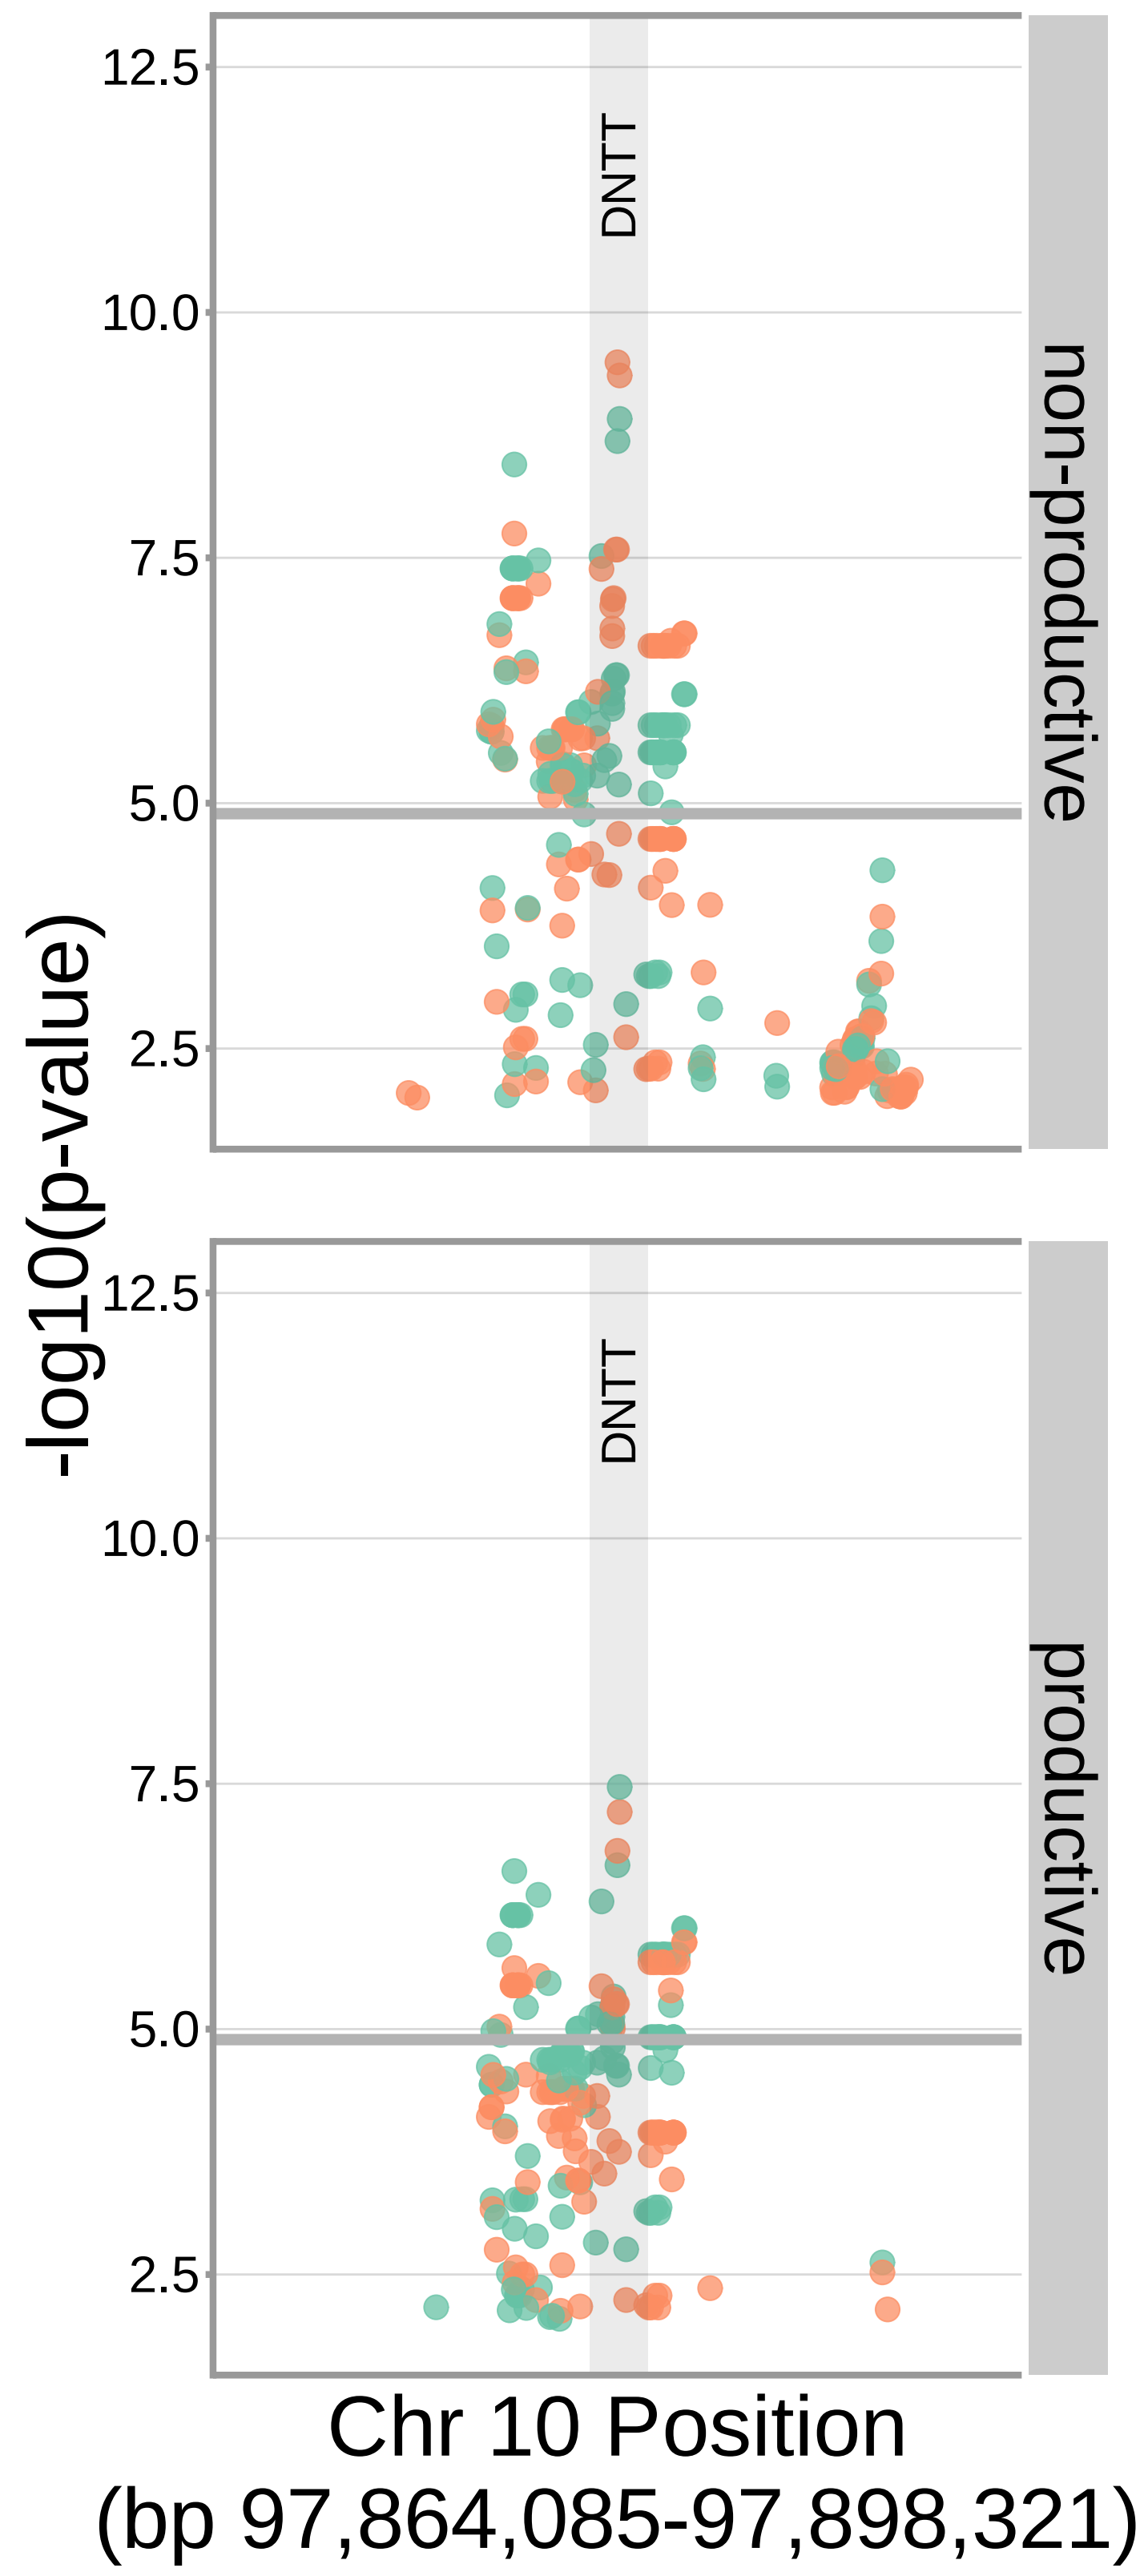

Cumulative probability

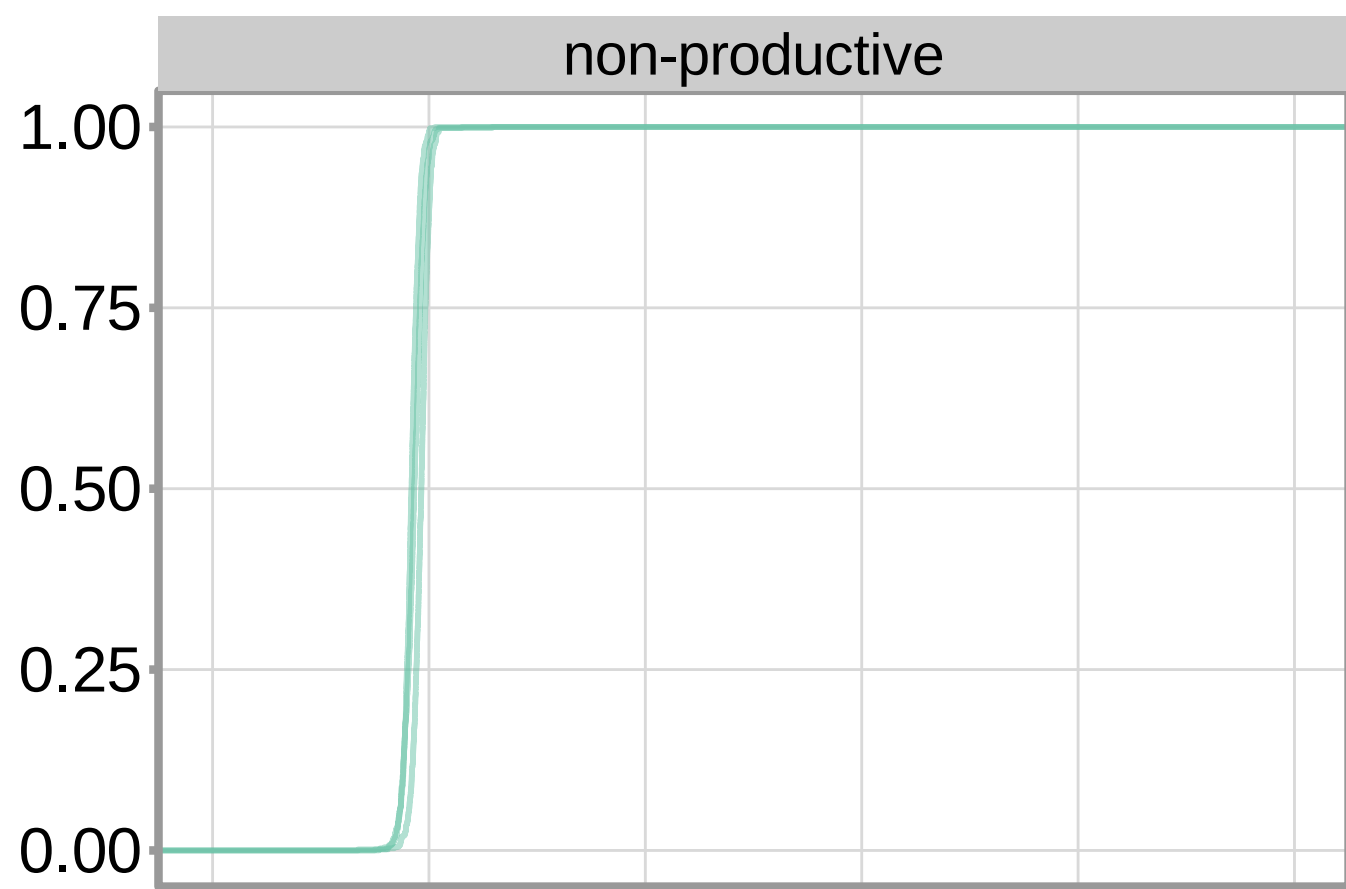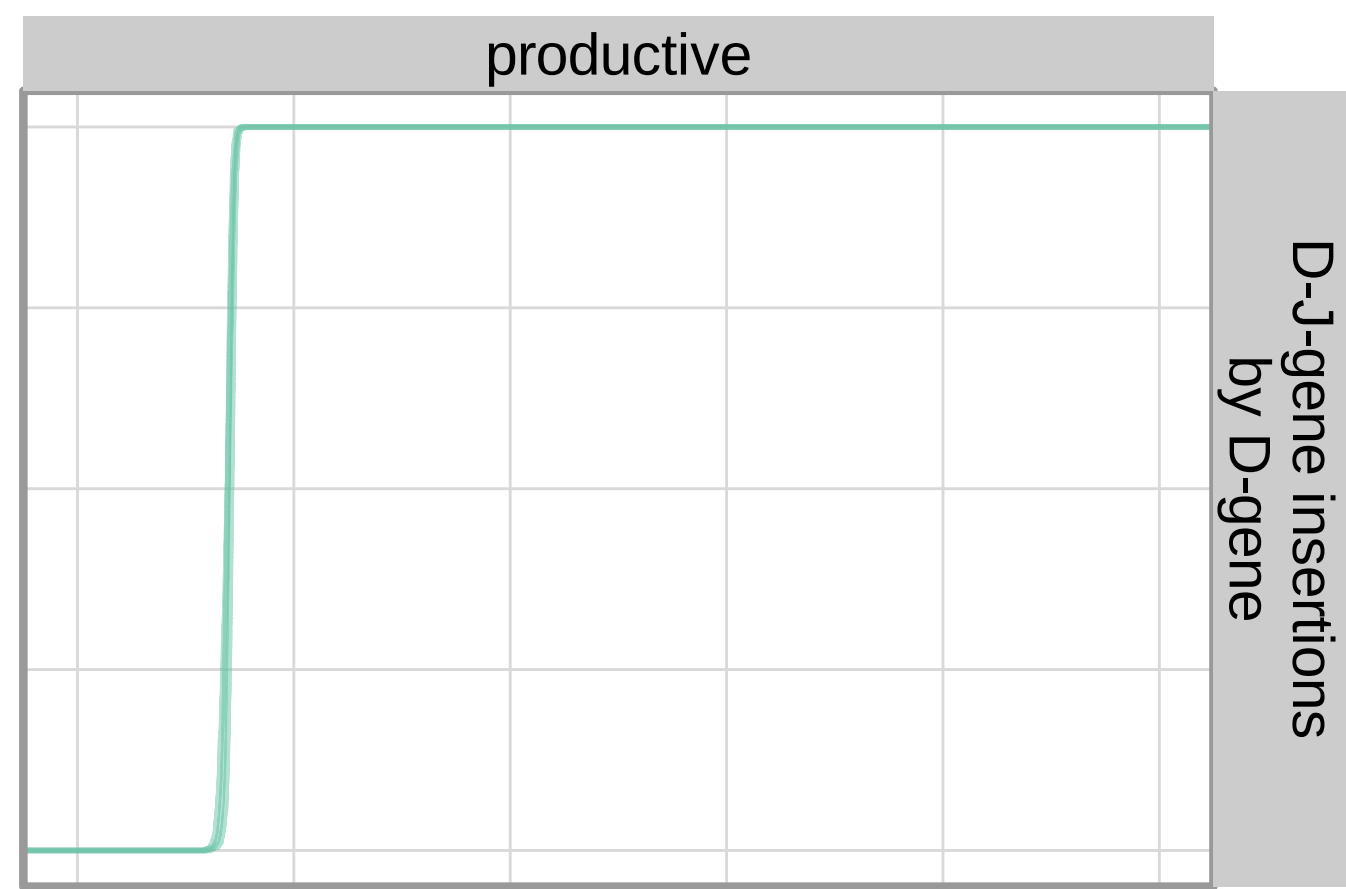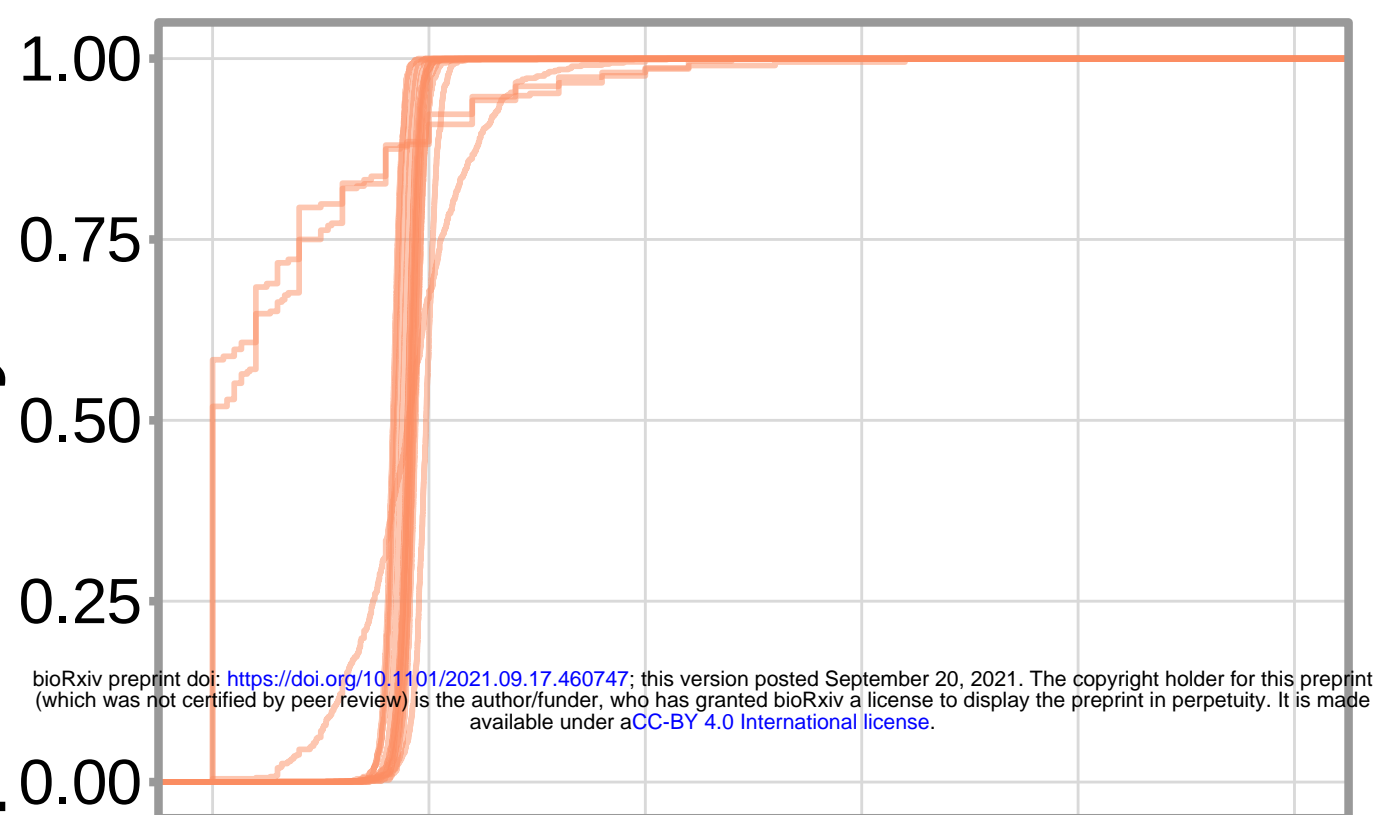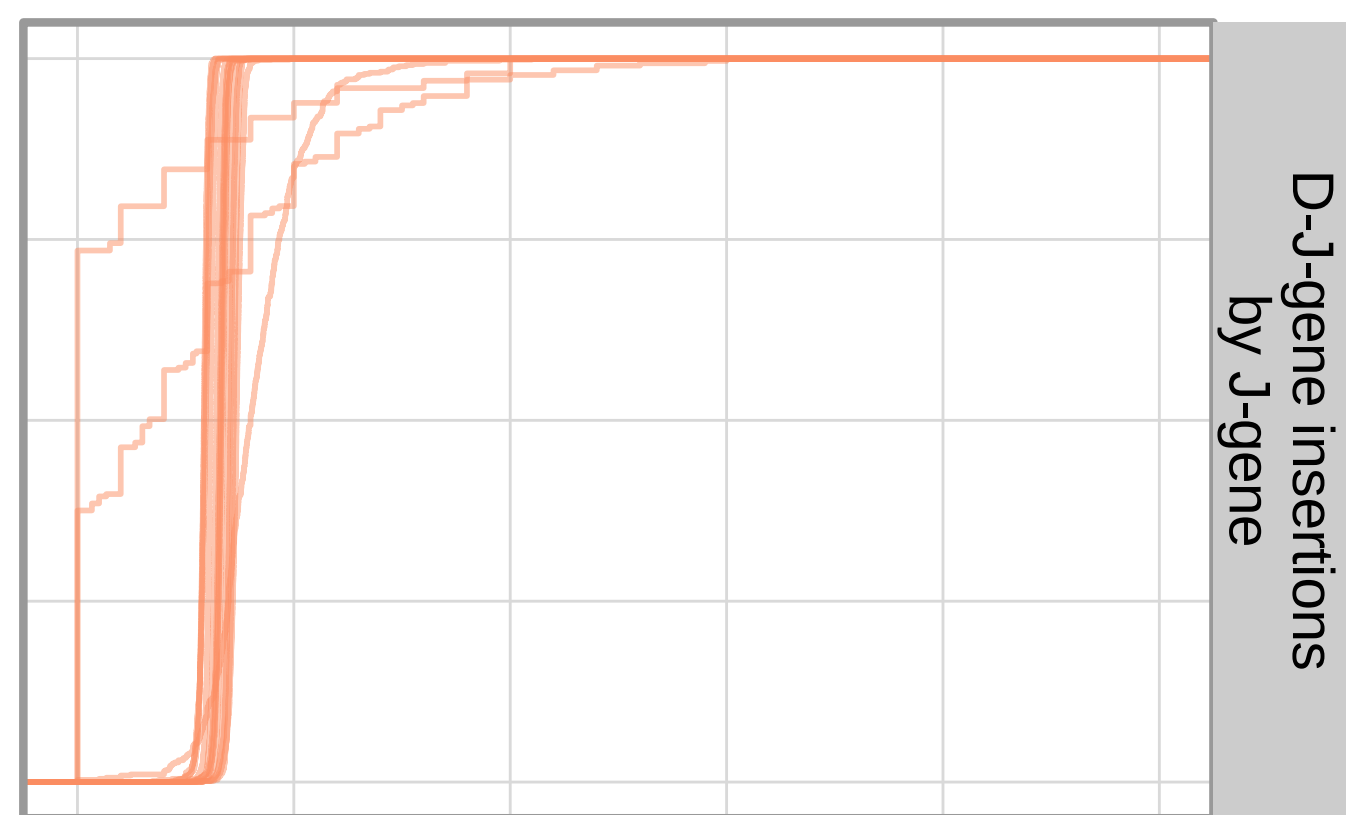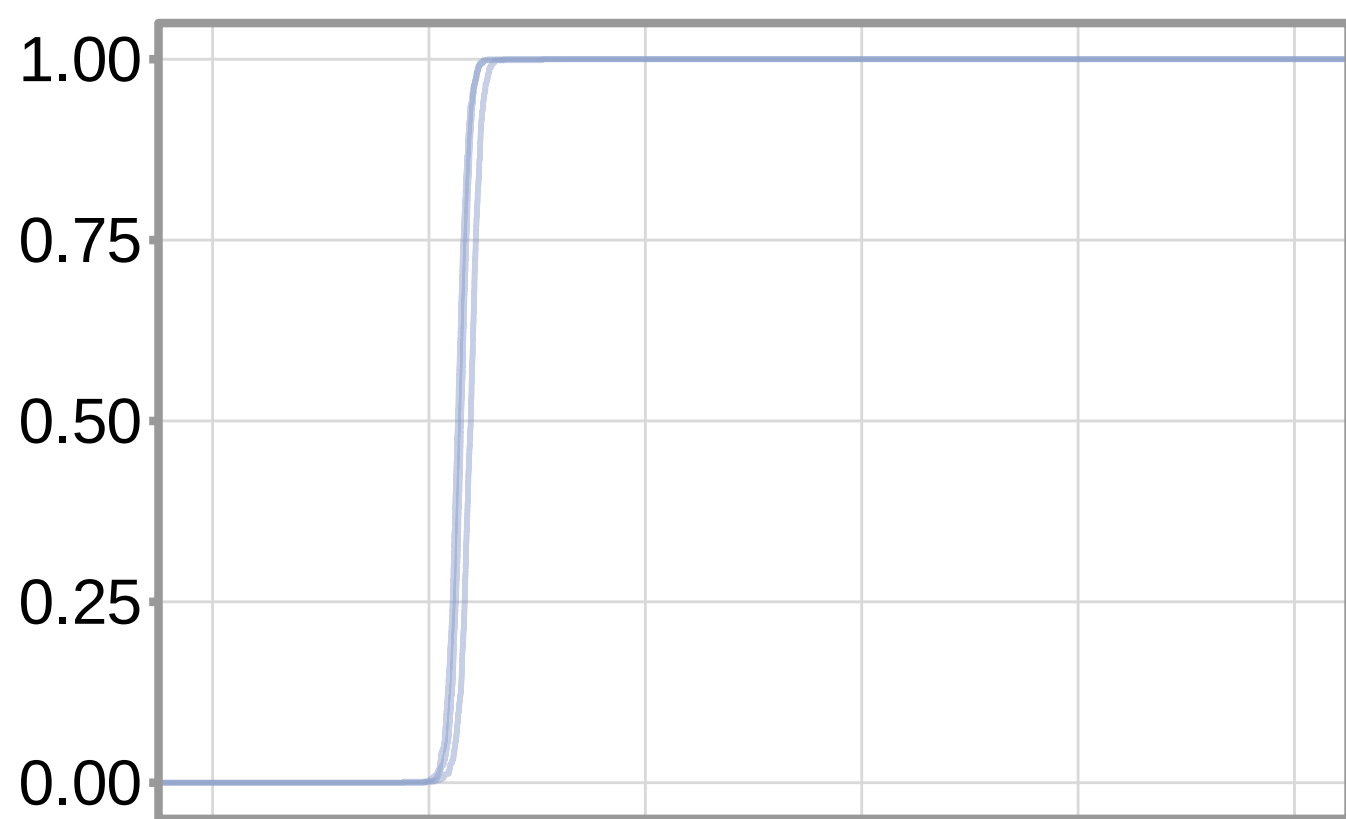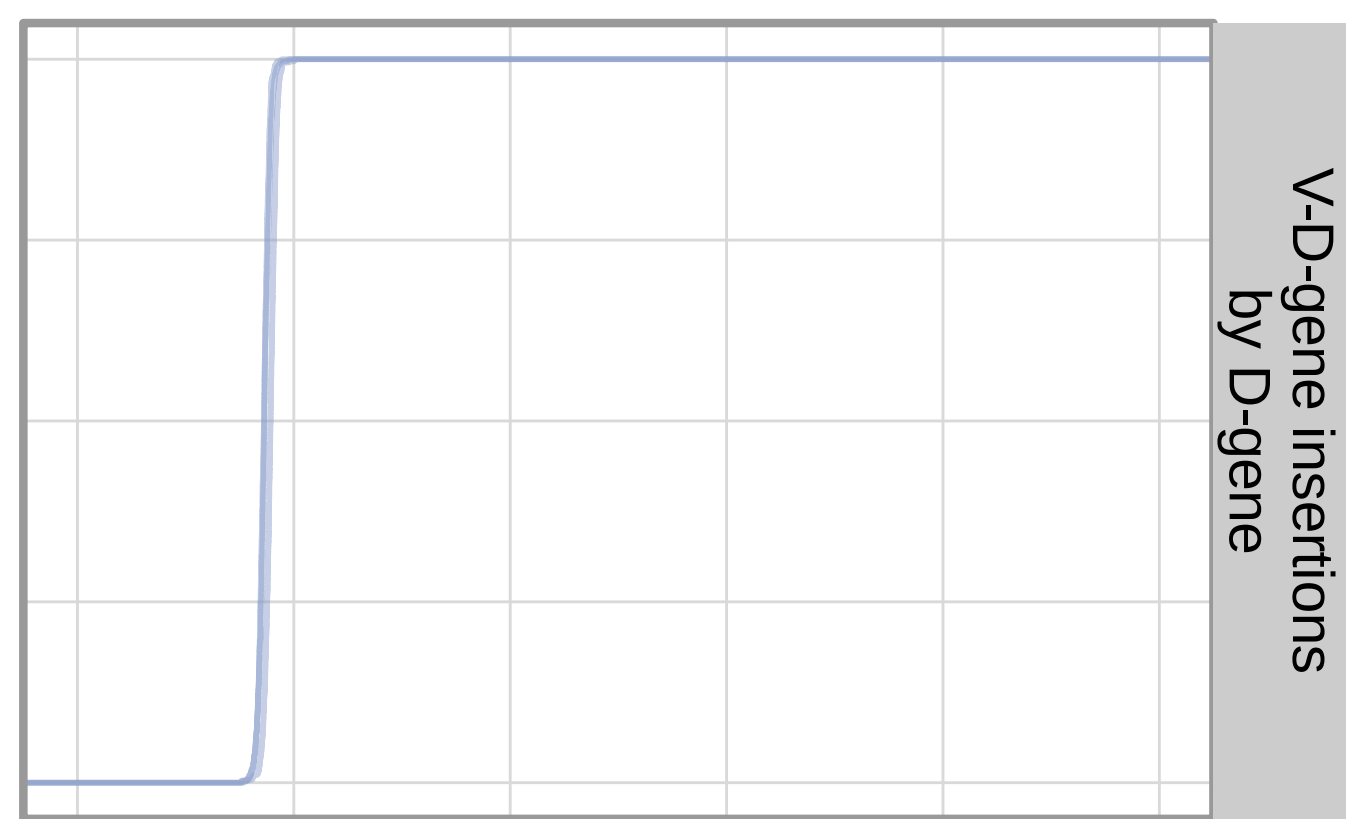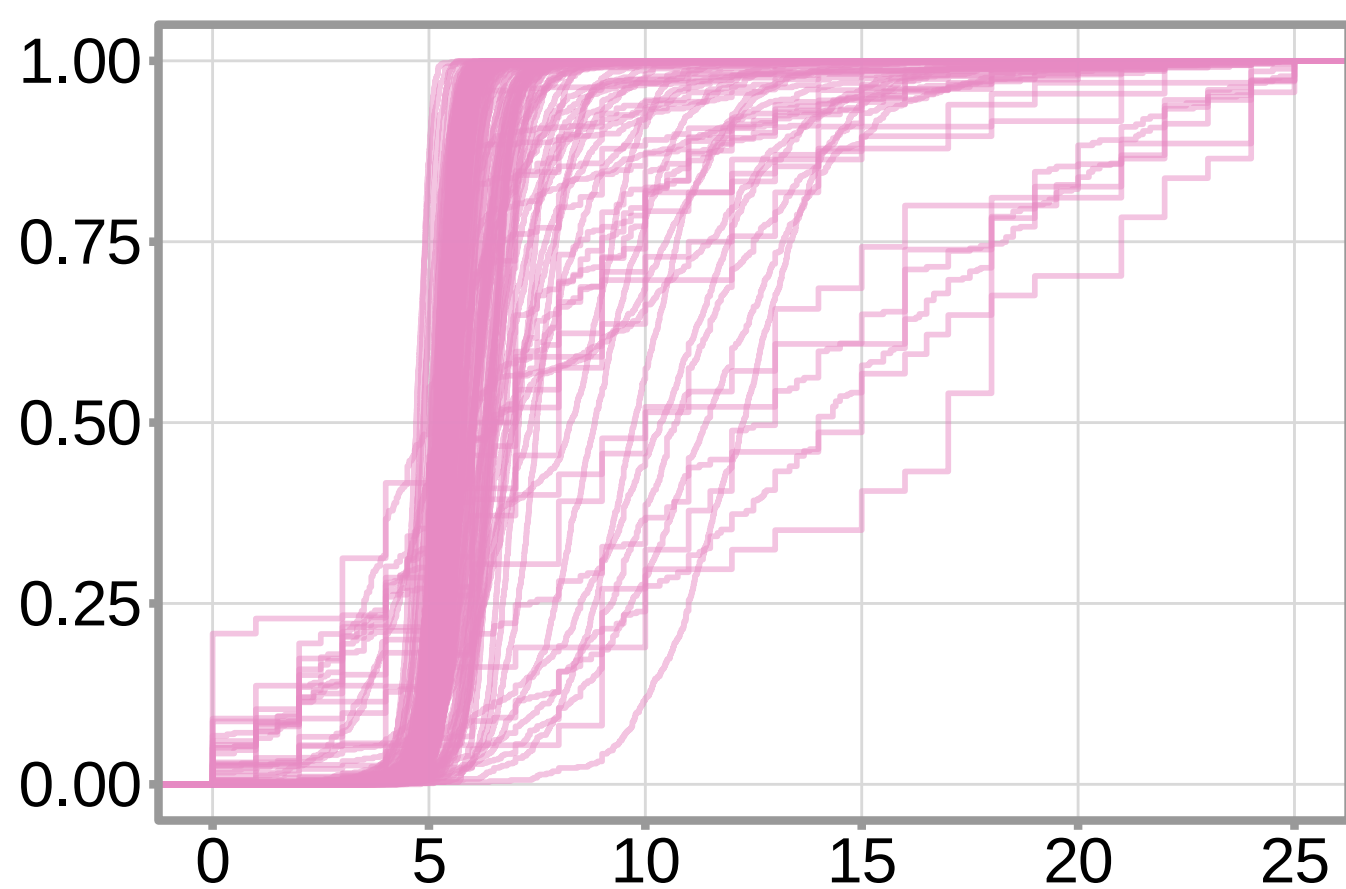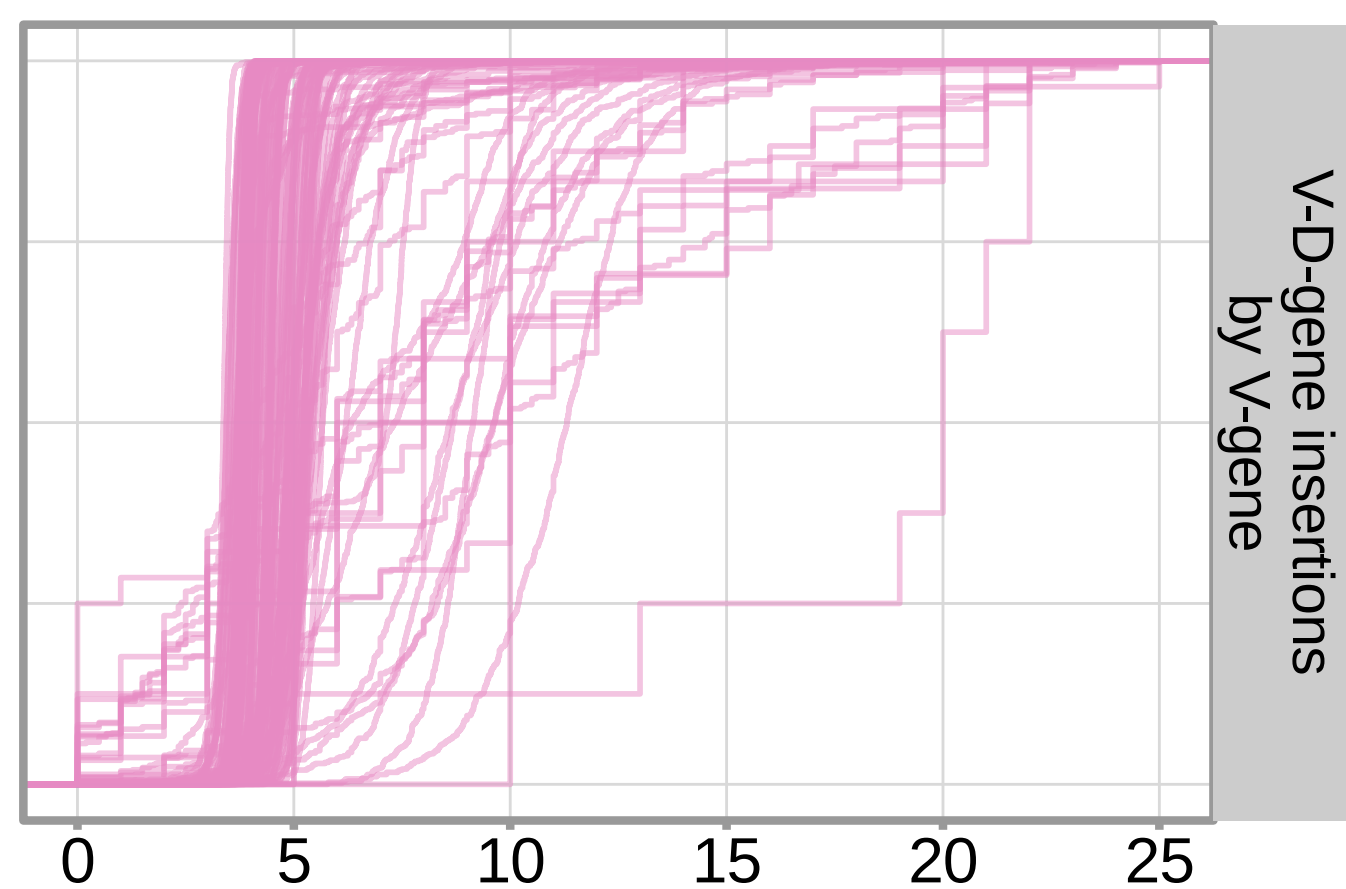

Number of N-insertions



$-\log_{10}(\text{p-value})$

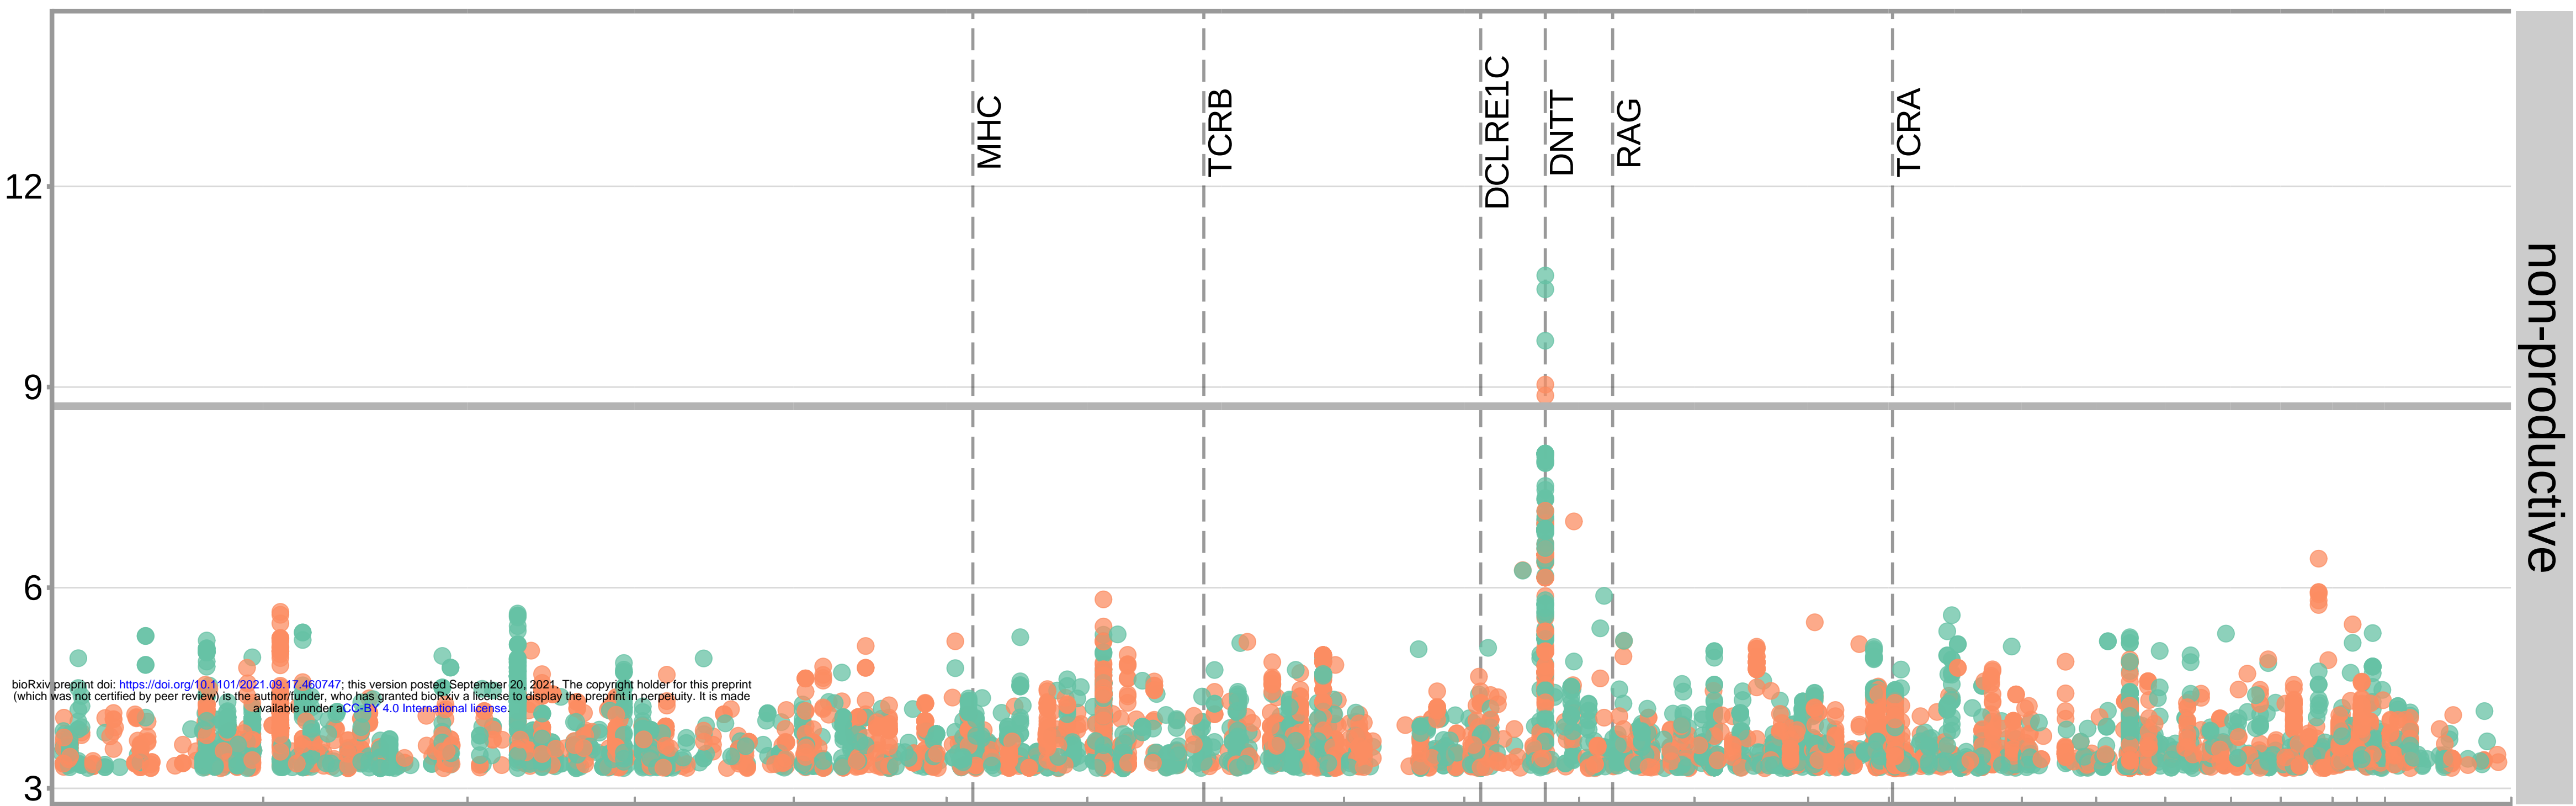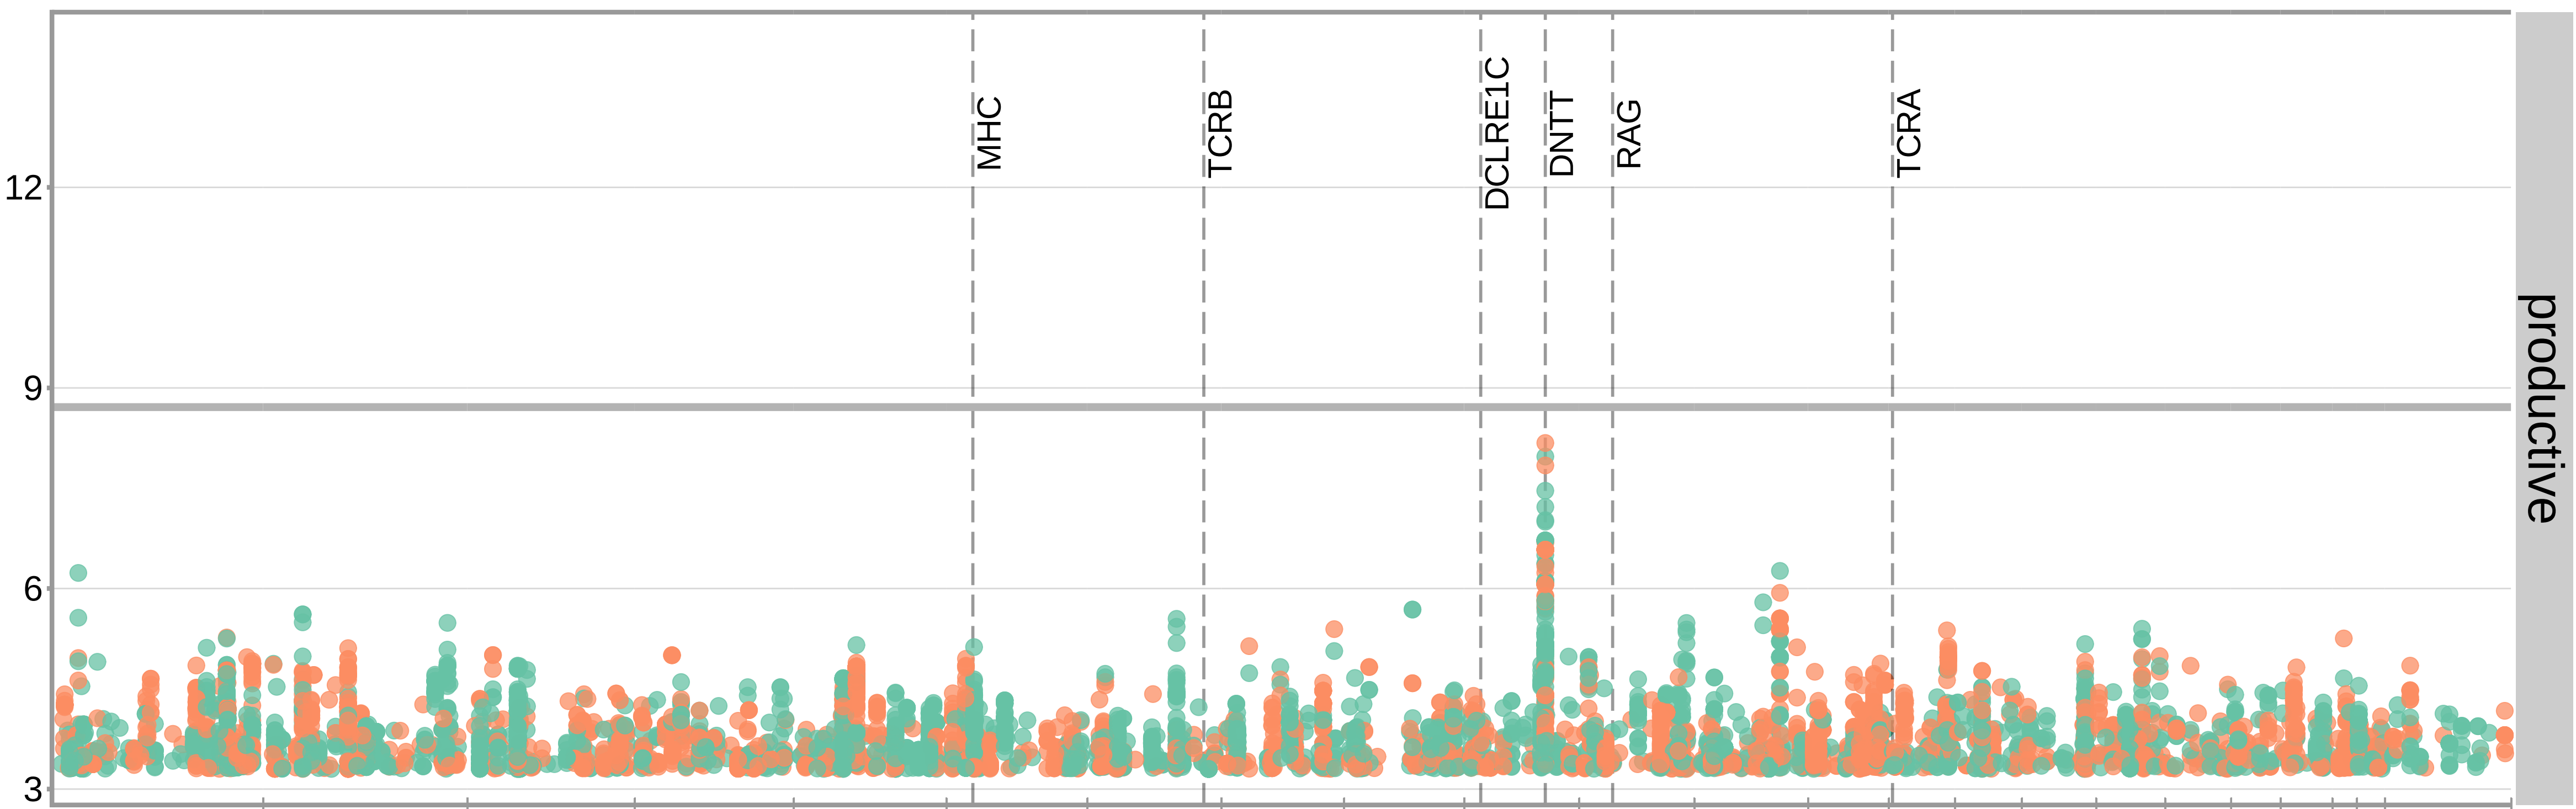

● V-D-gene junction N-insertions ● D-J-gene junction N-insertions

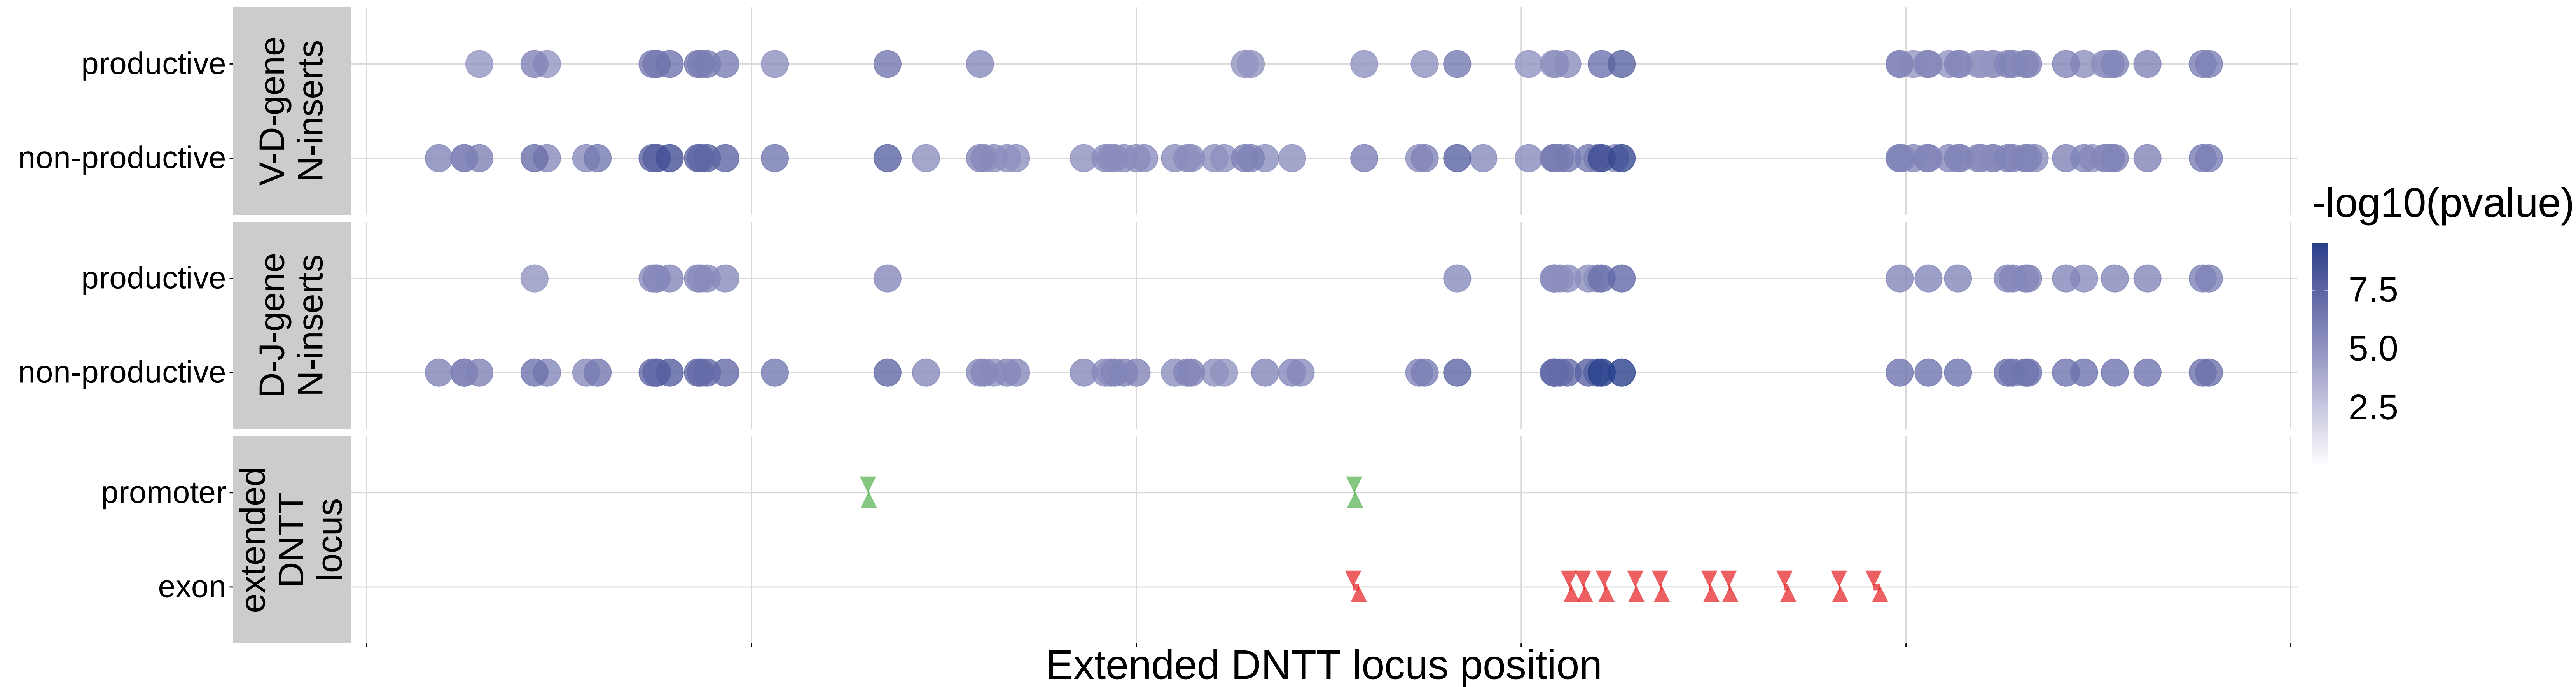

### non-productive

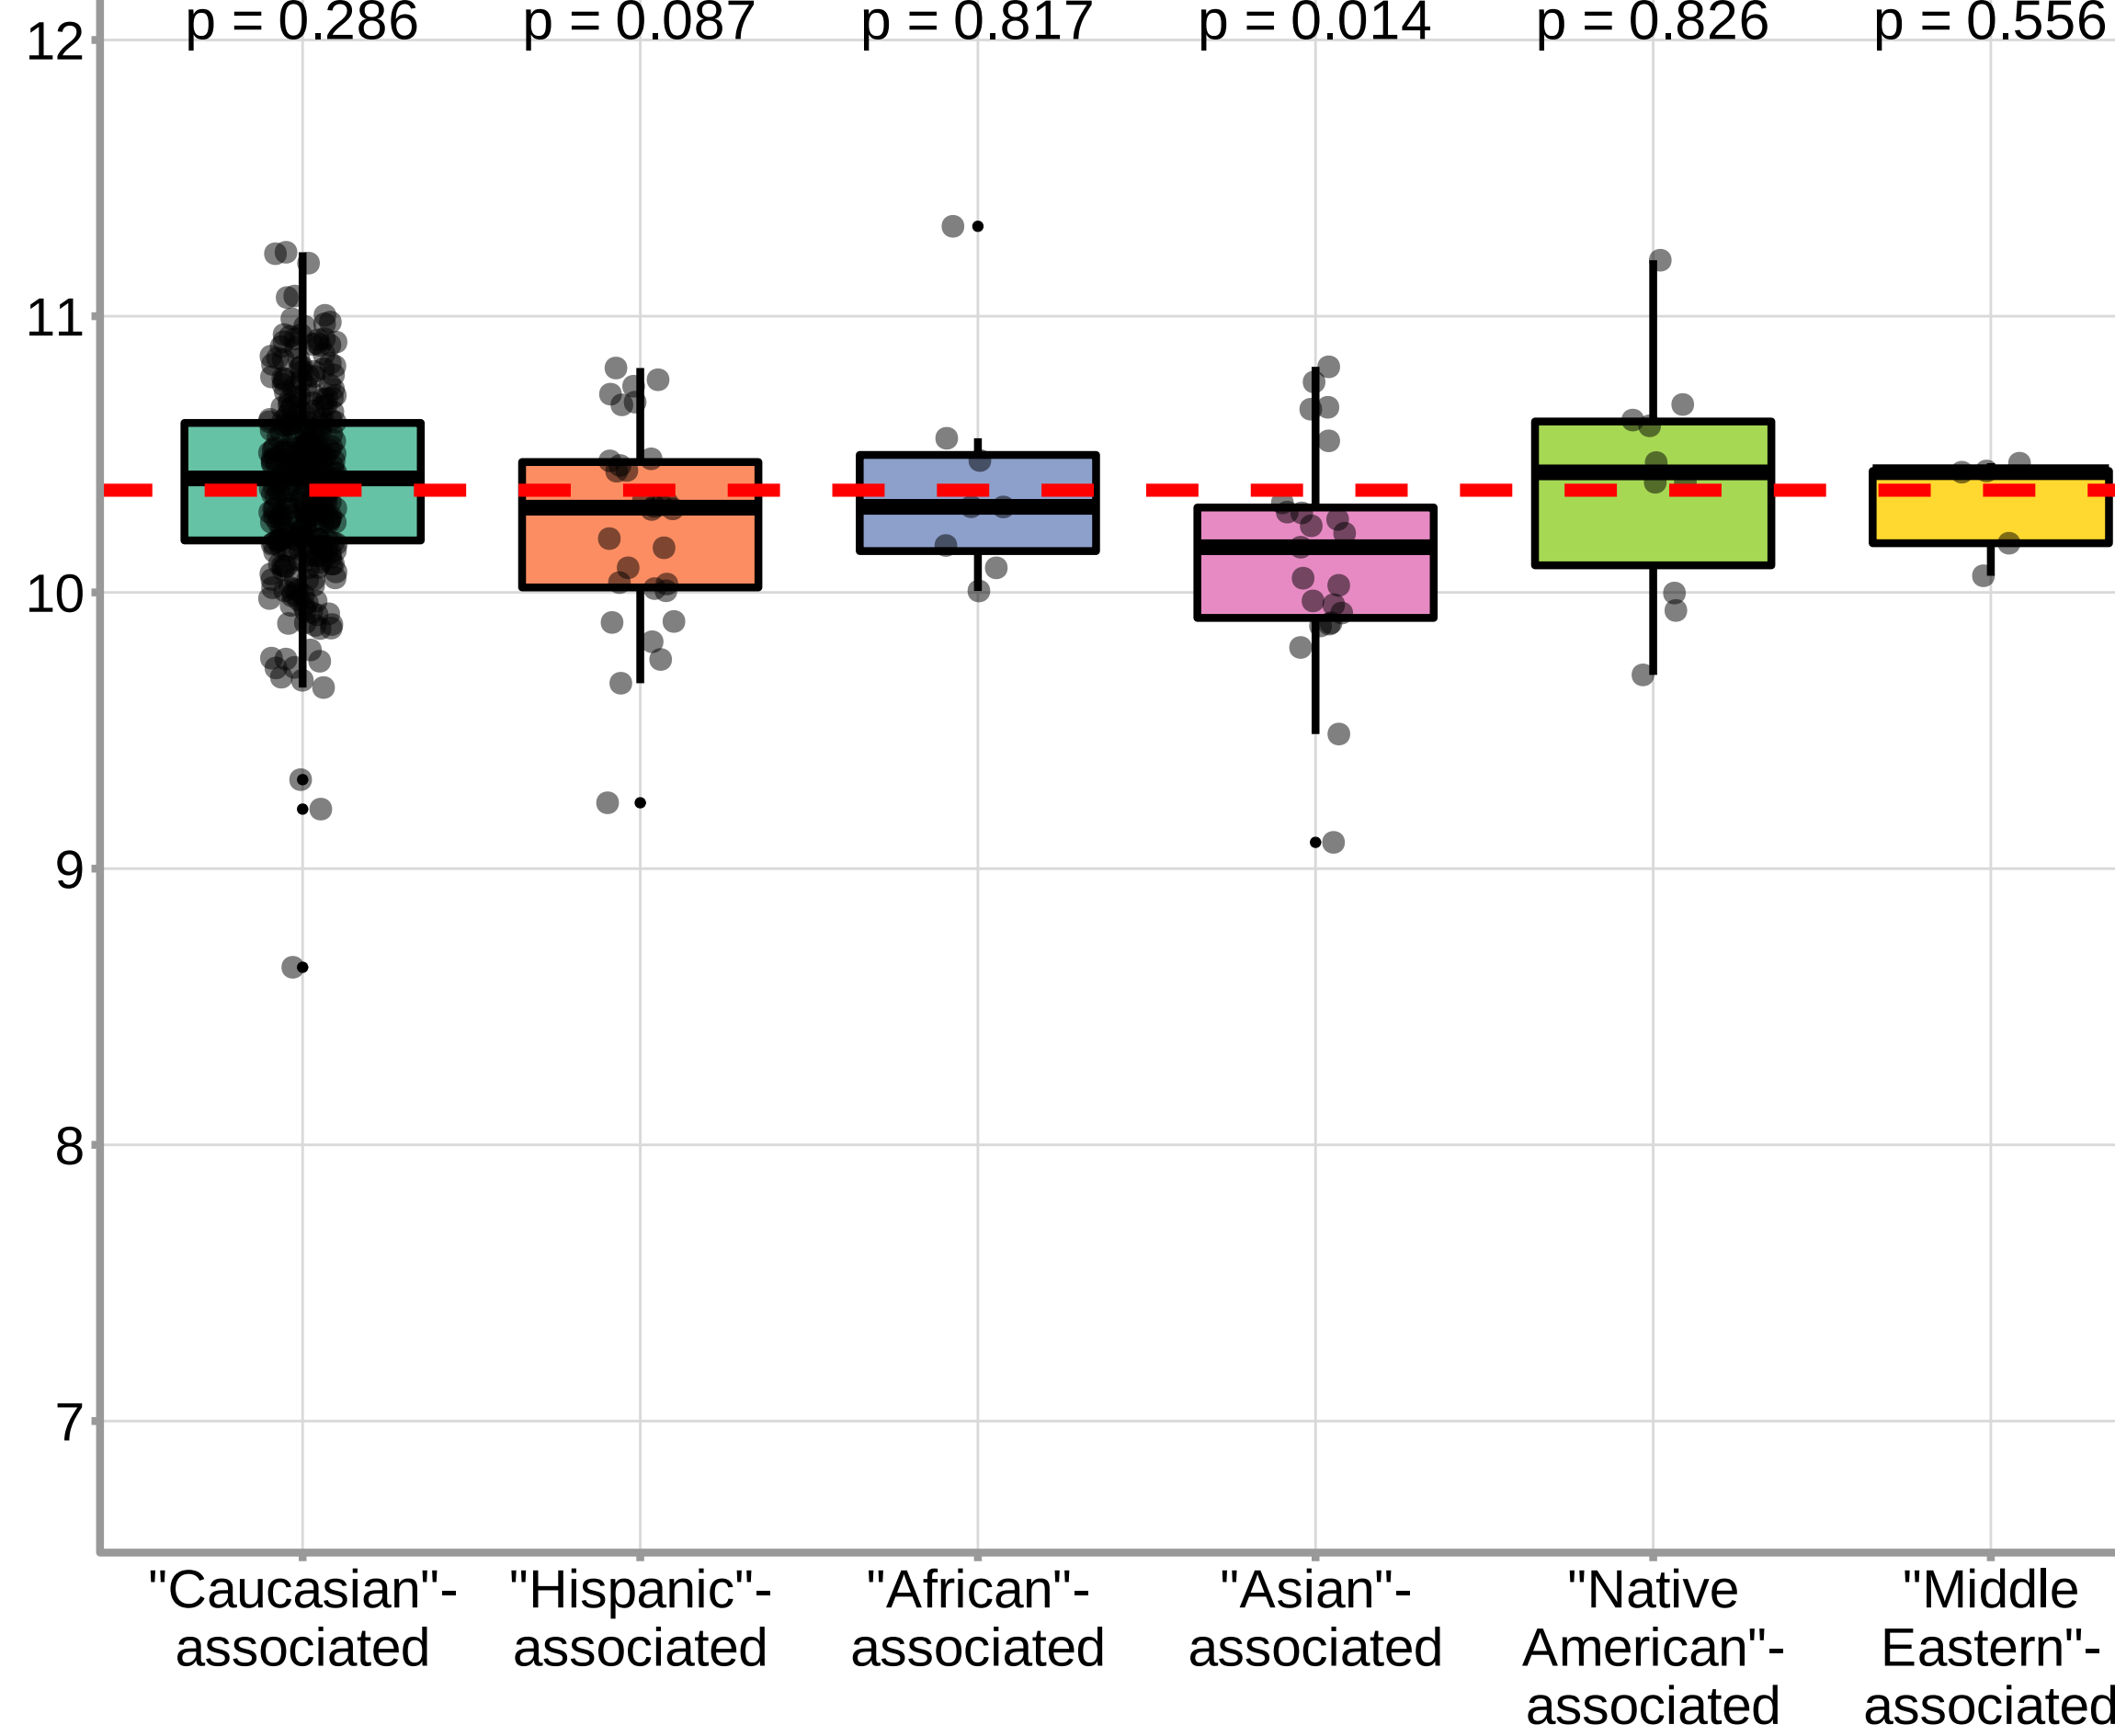

### productive

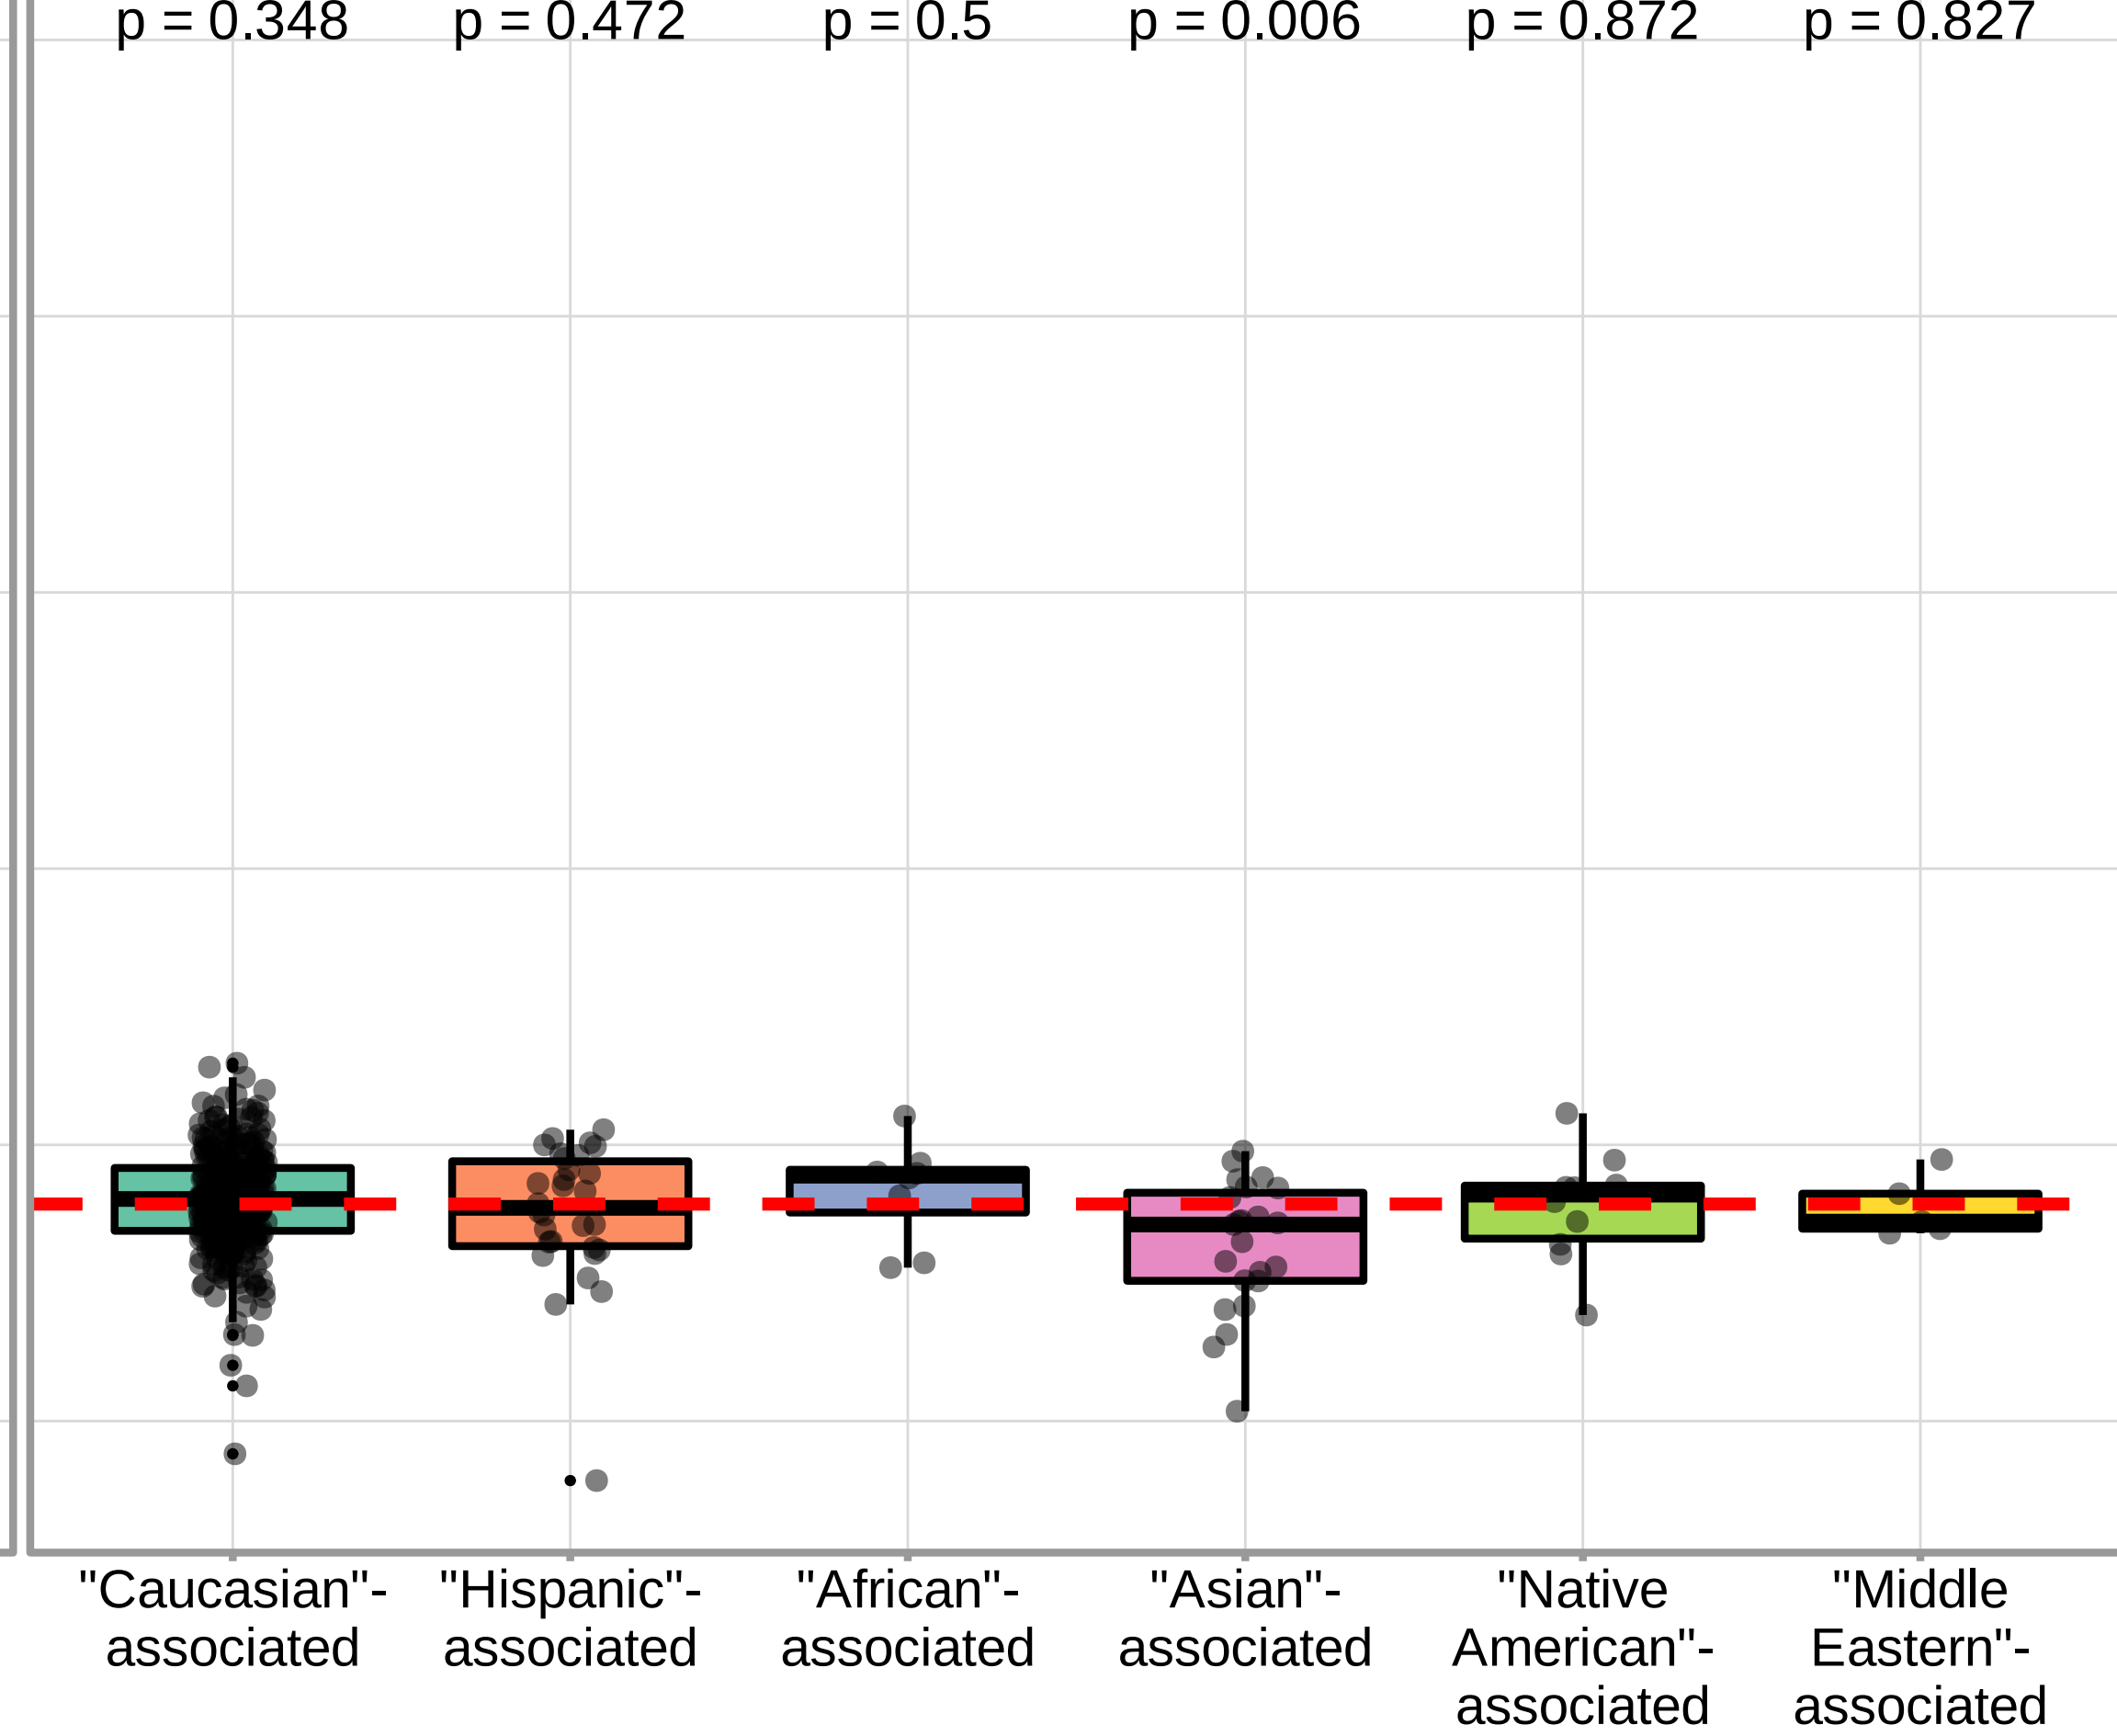

PCA cluster



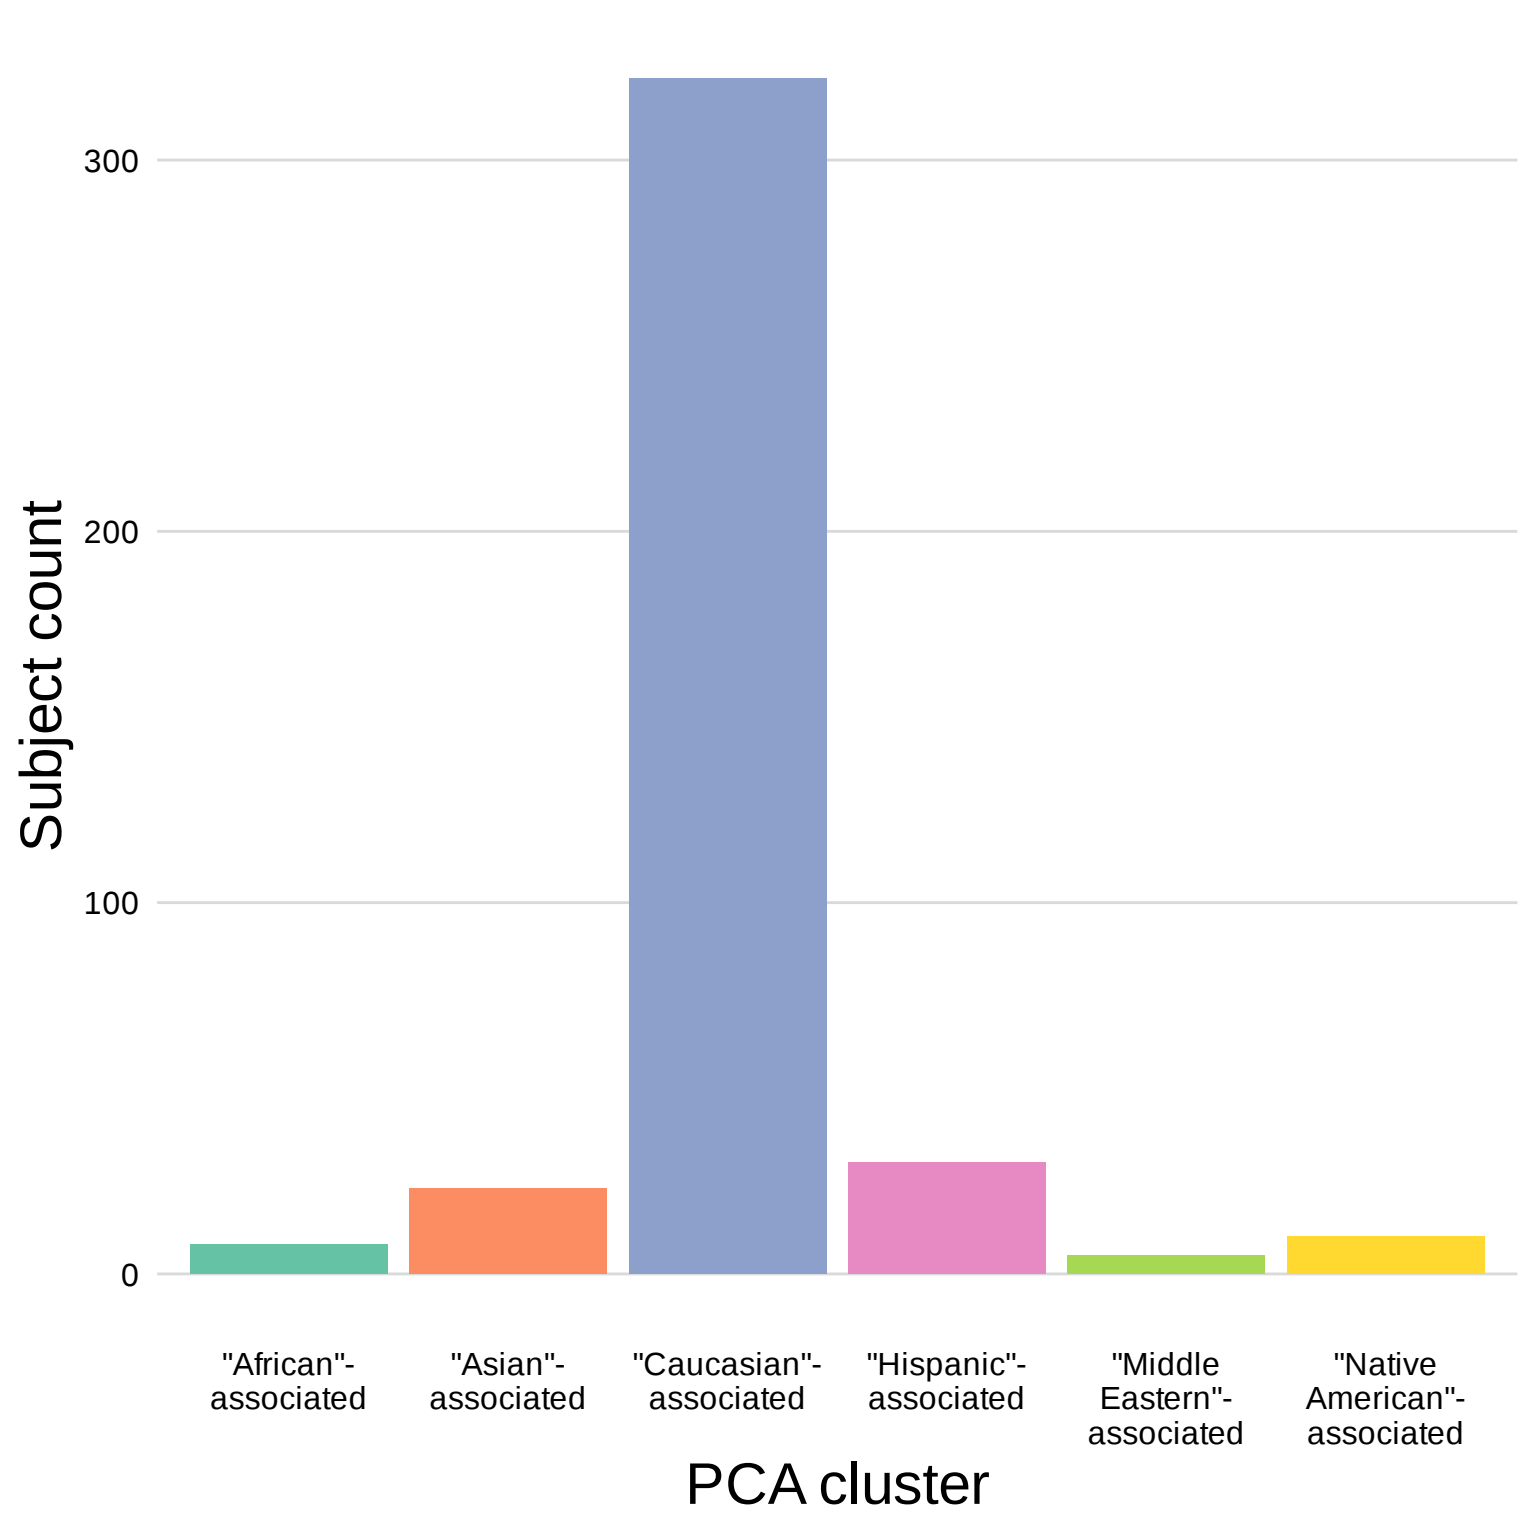

Subject count

300  
200  
100  
0

"African"-associated

"Asian"-associated

"Caucasian"-associated

"Hispanic"-associated

"Middle Eastern"-associated

"Native American"-associated

PCA cluster

Minor allele frequency

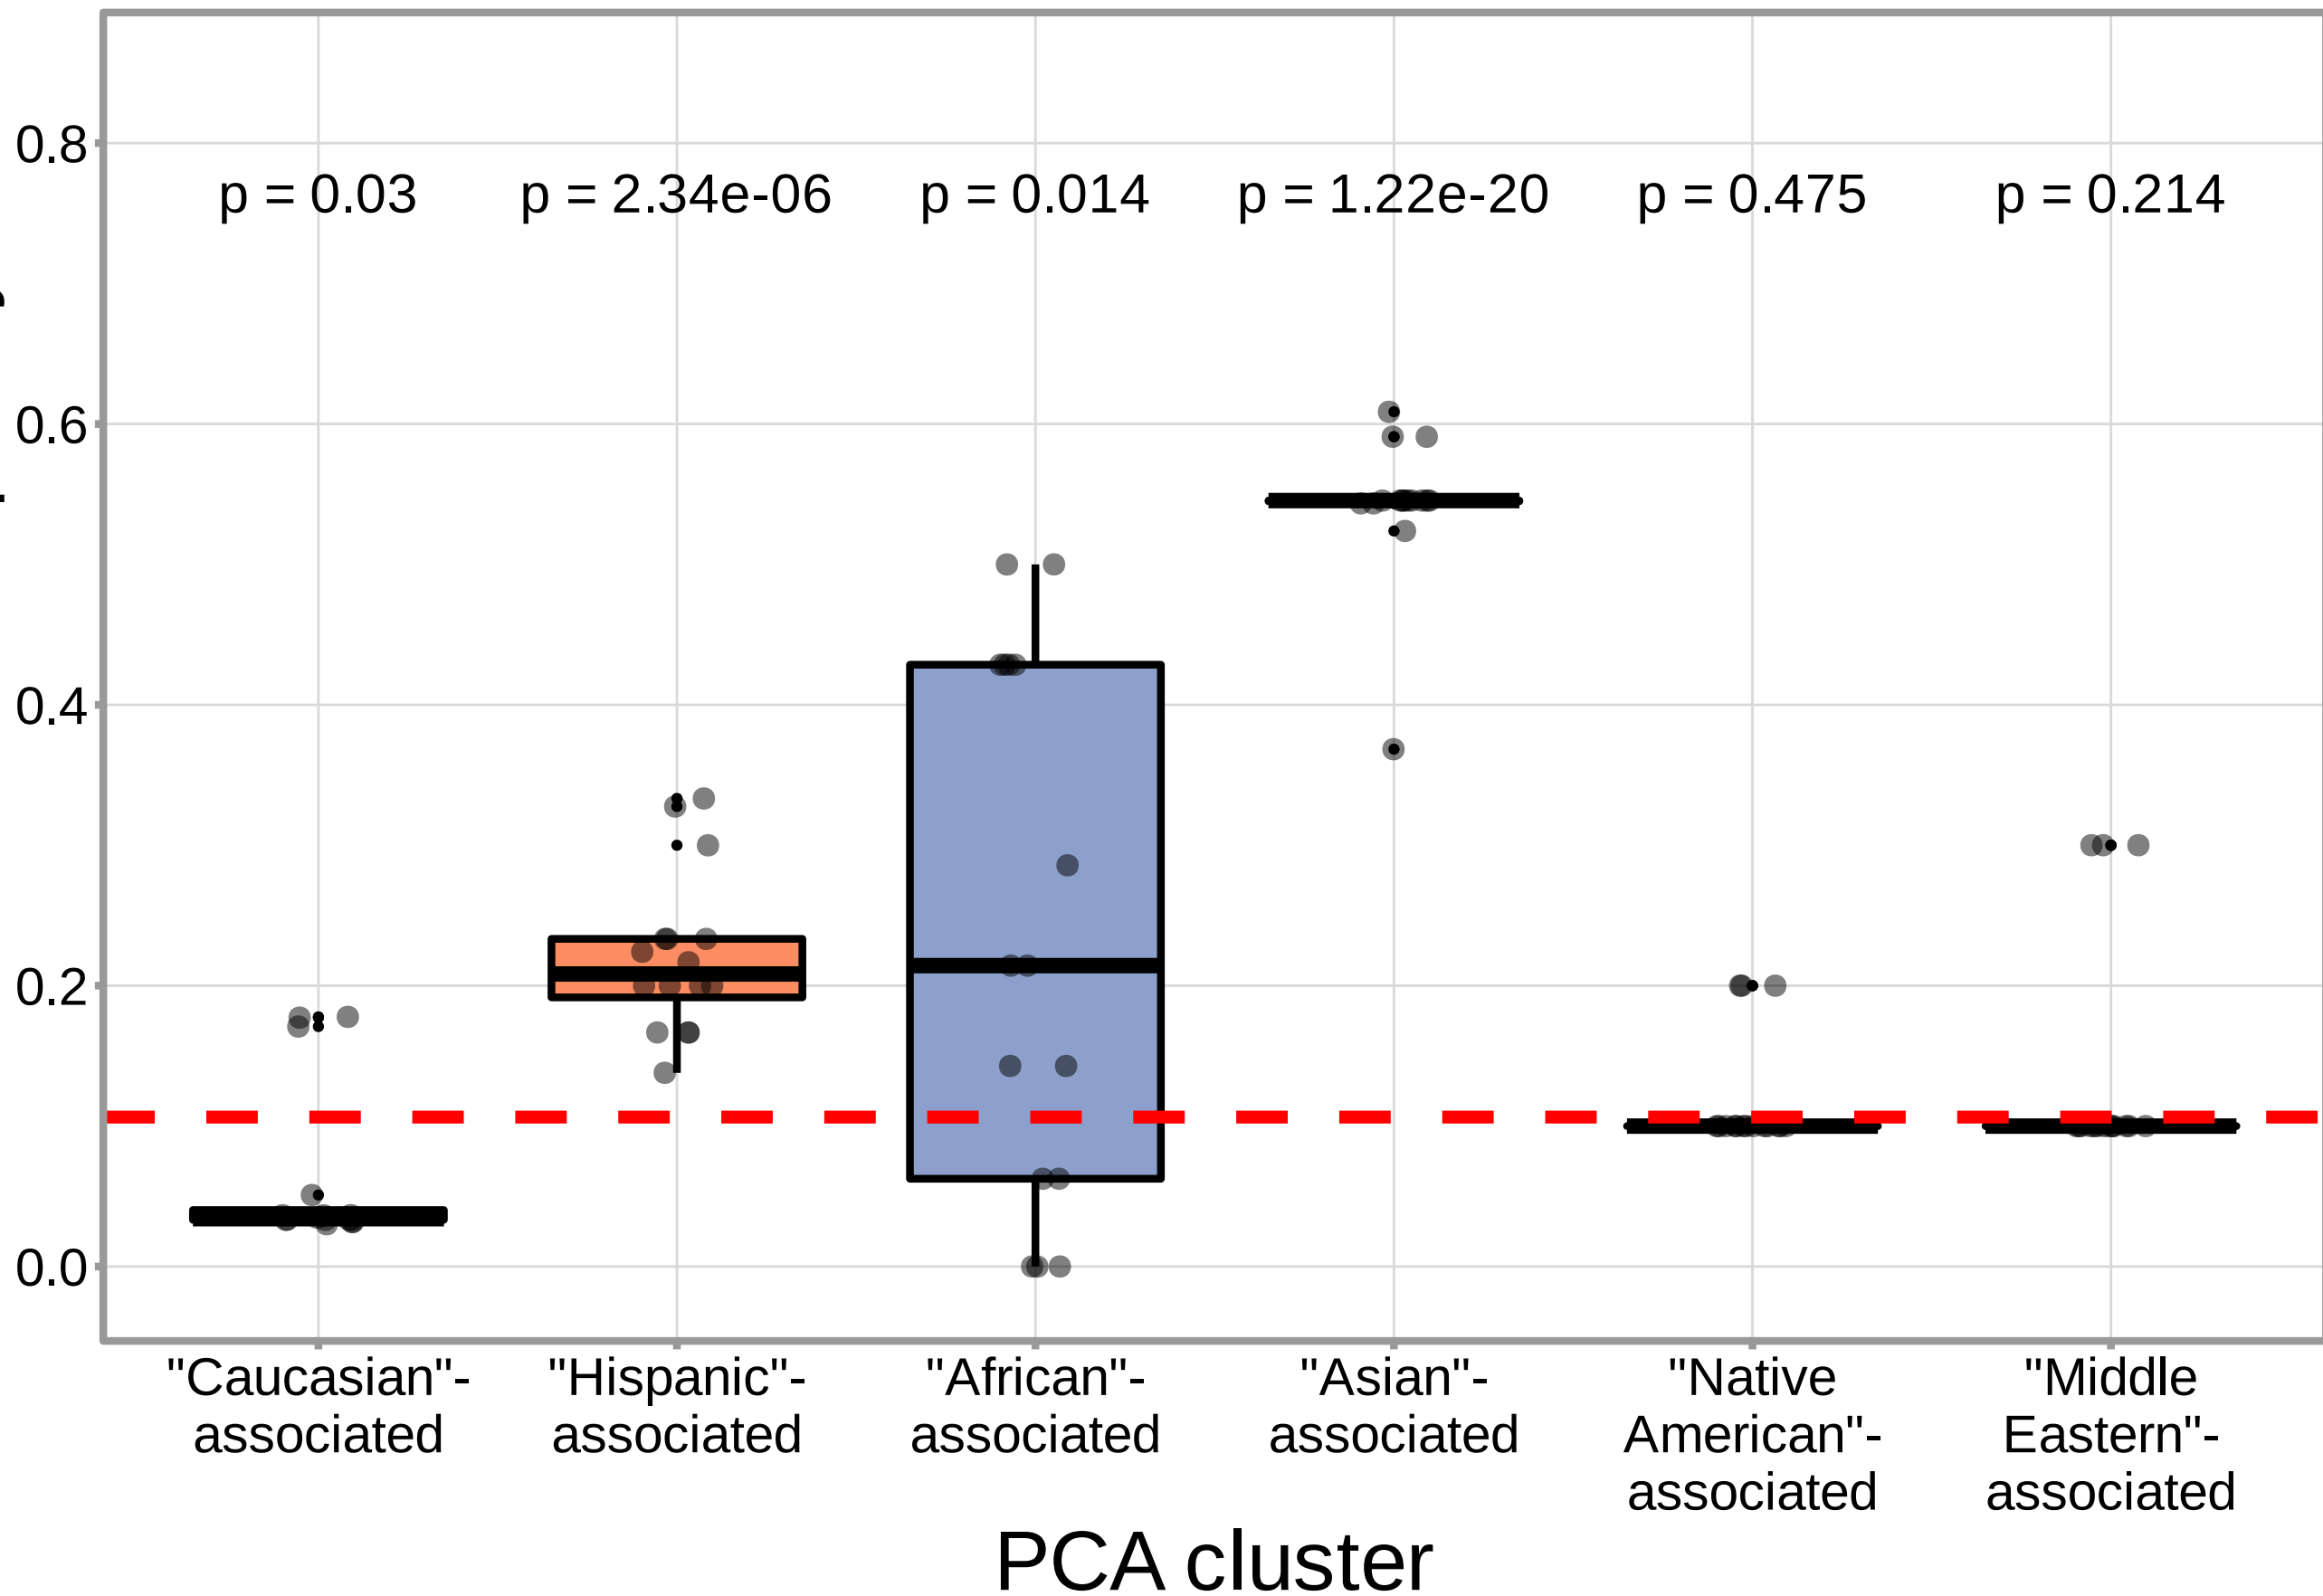

**A** Number of V-gene nucleotides deleted

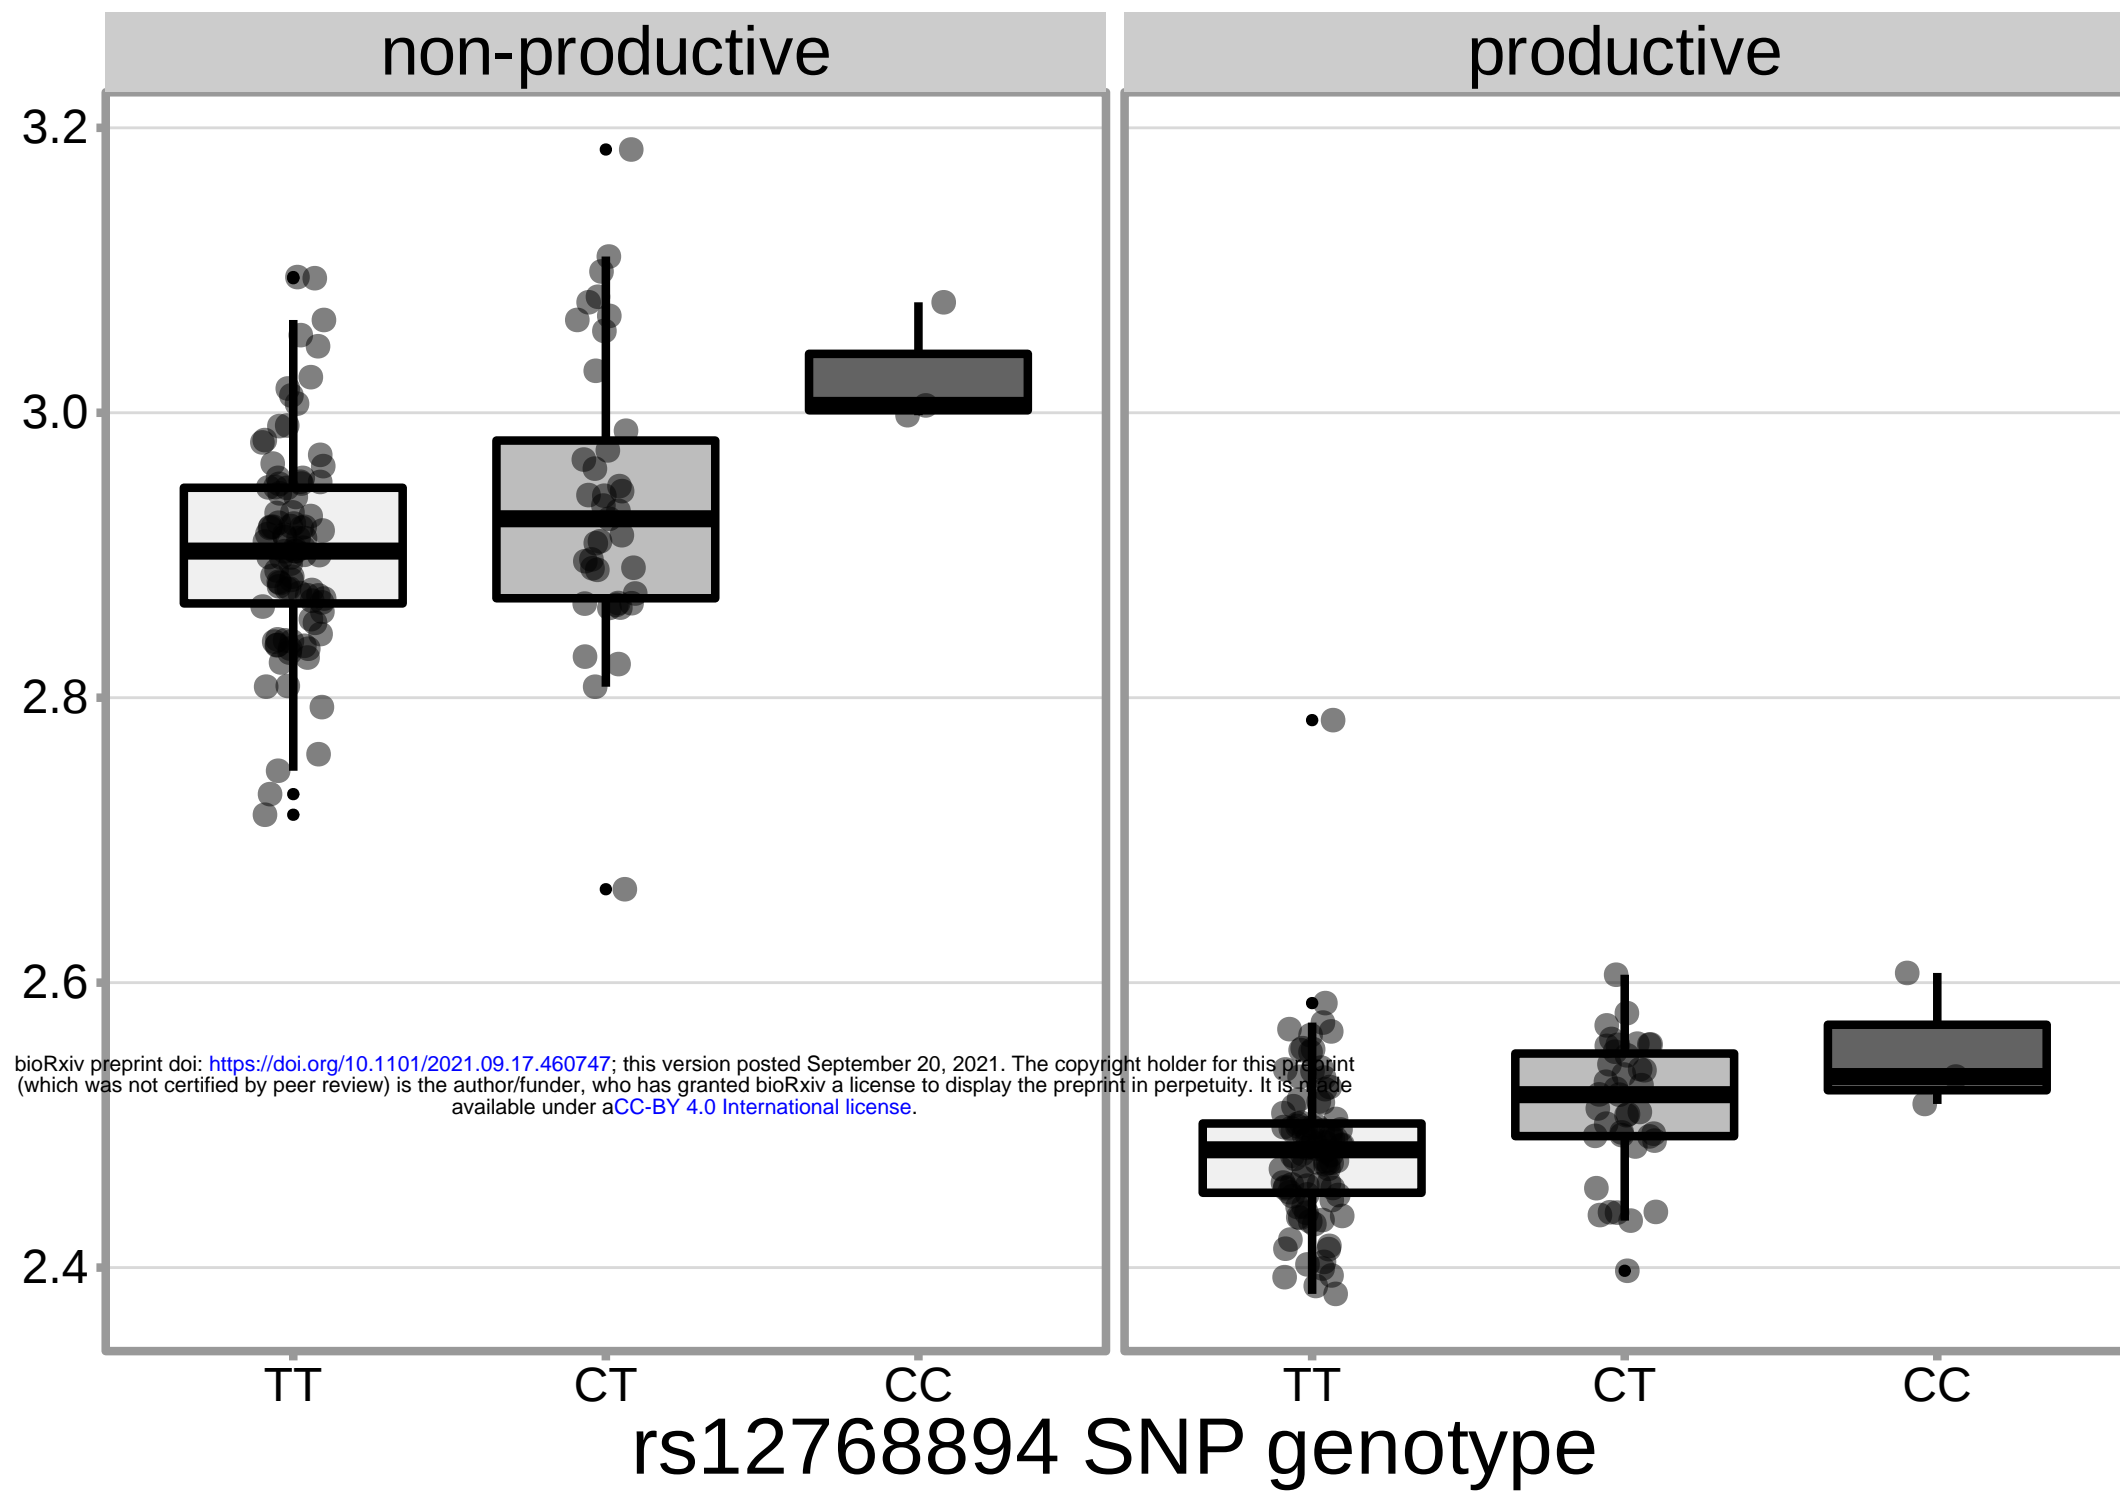

**B** Number of J-gene nucleotides deleted

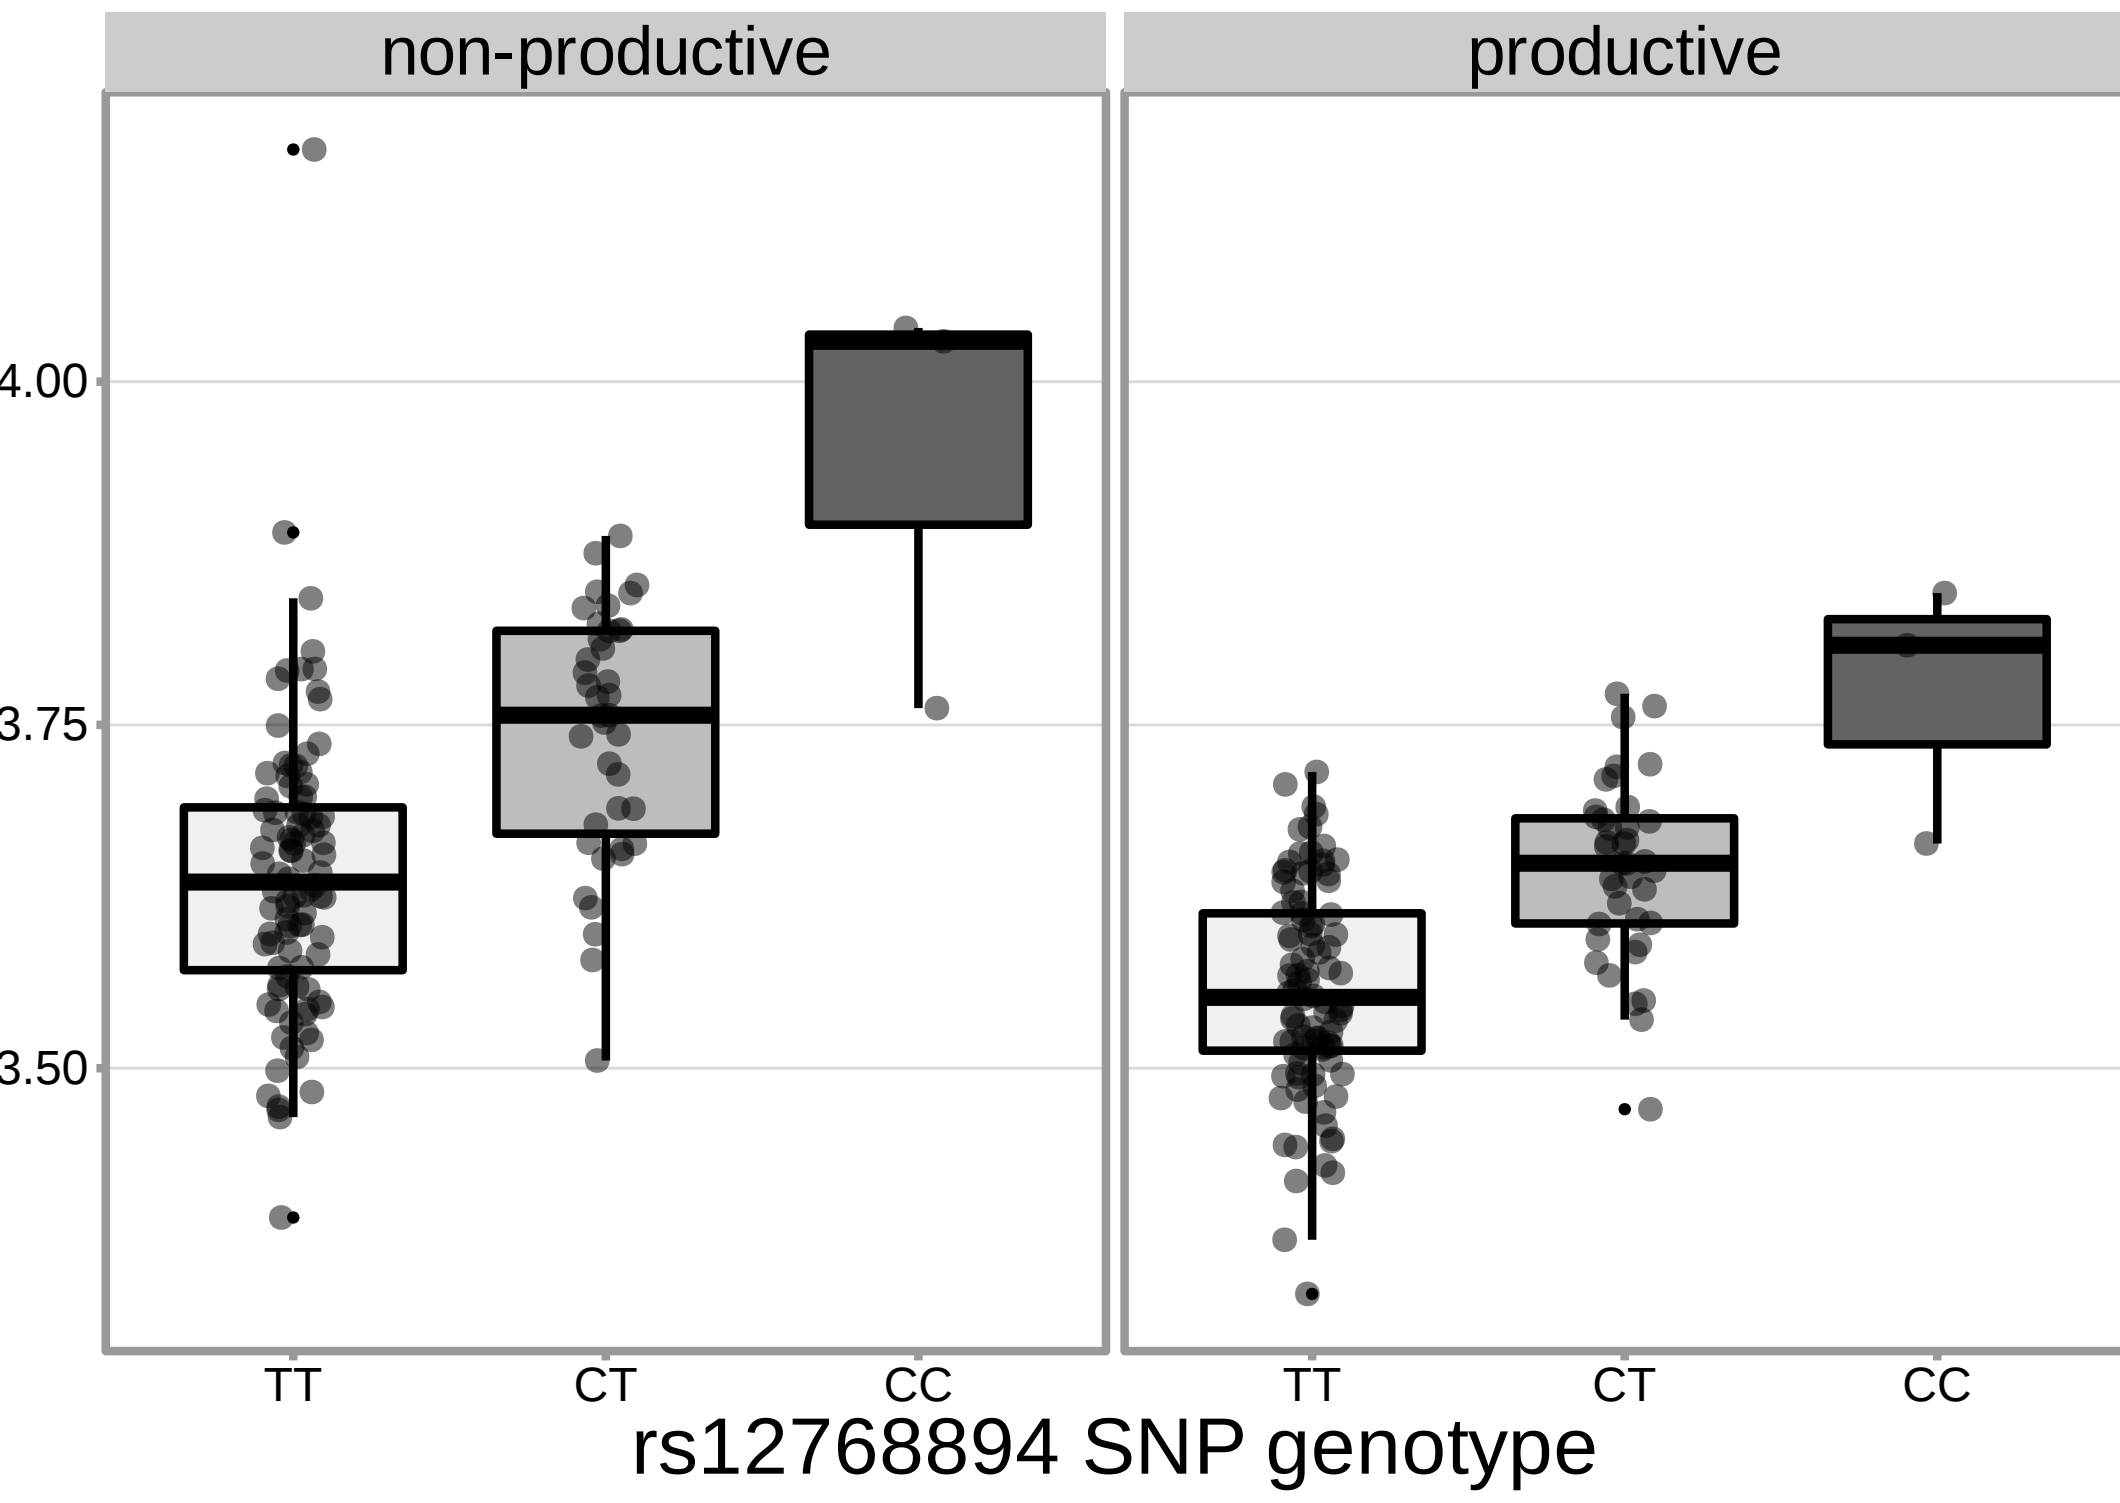

**A**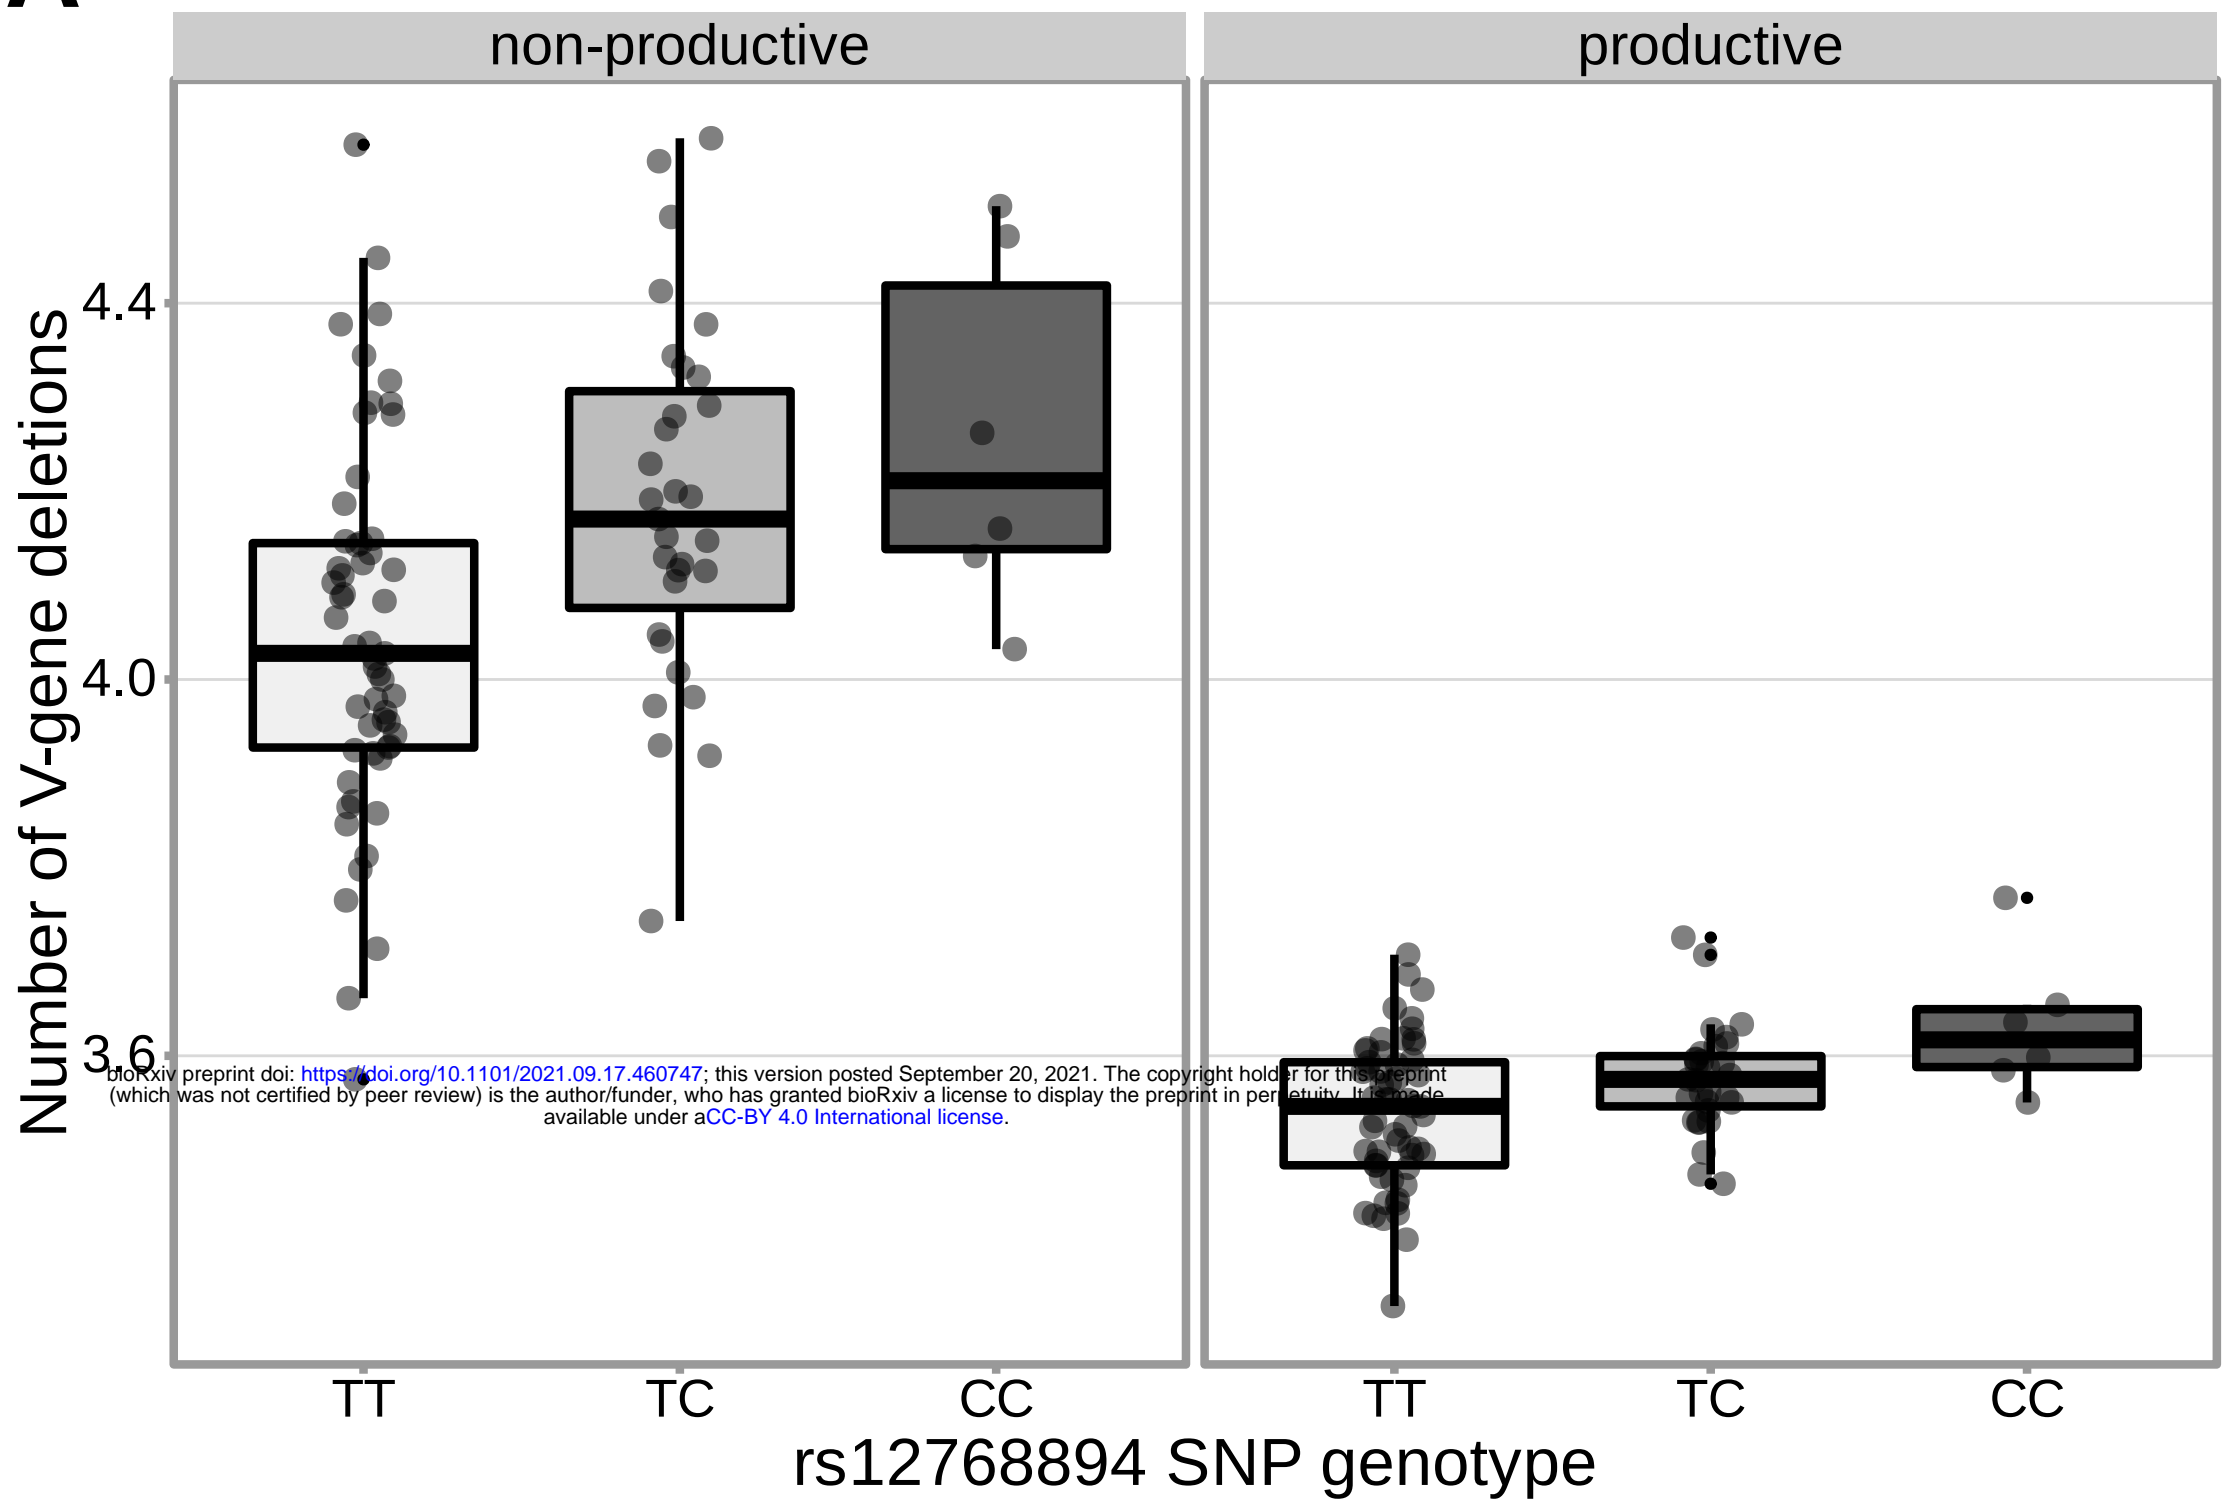**B**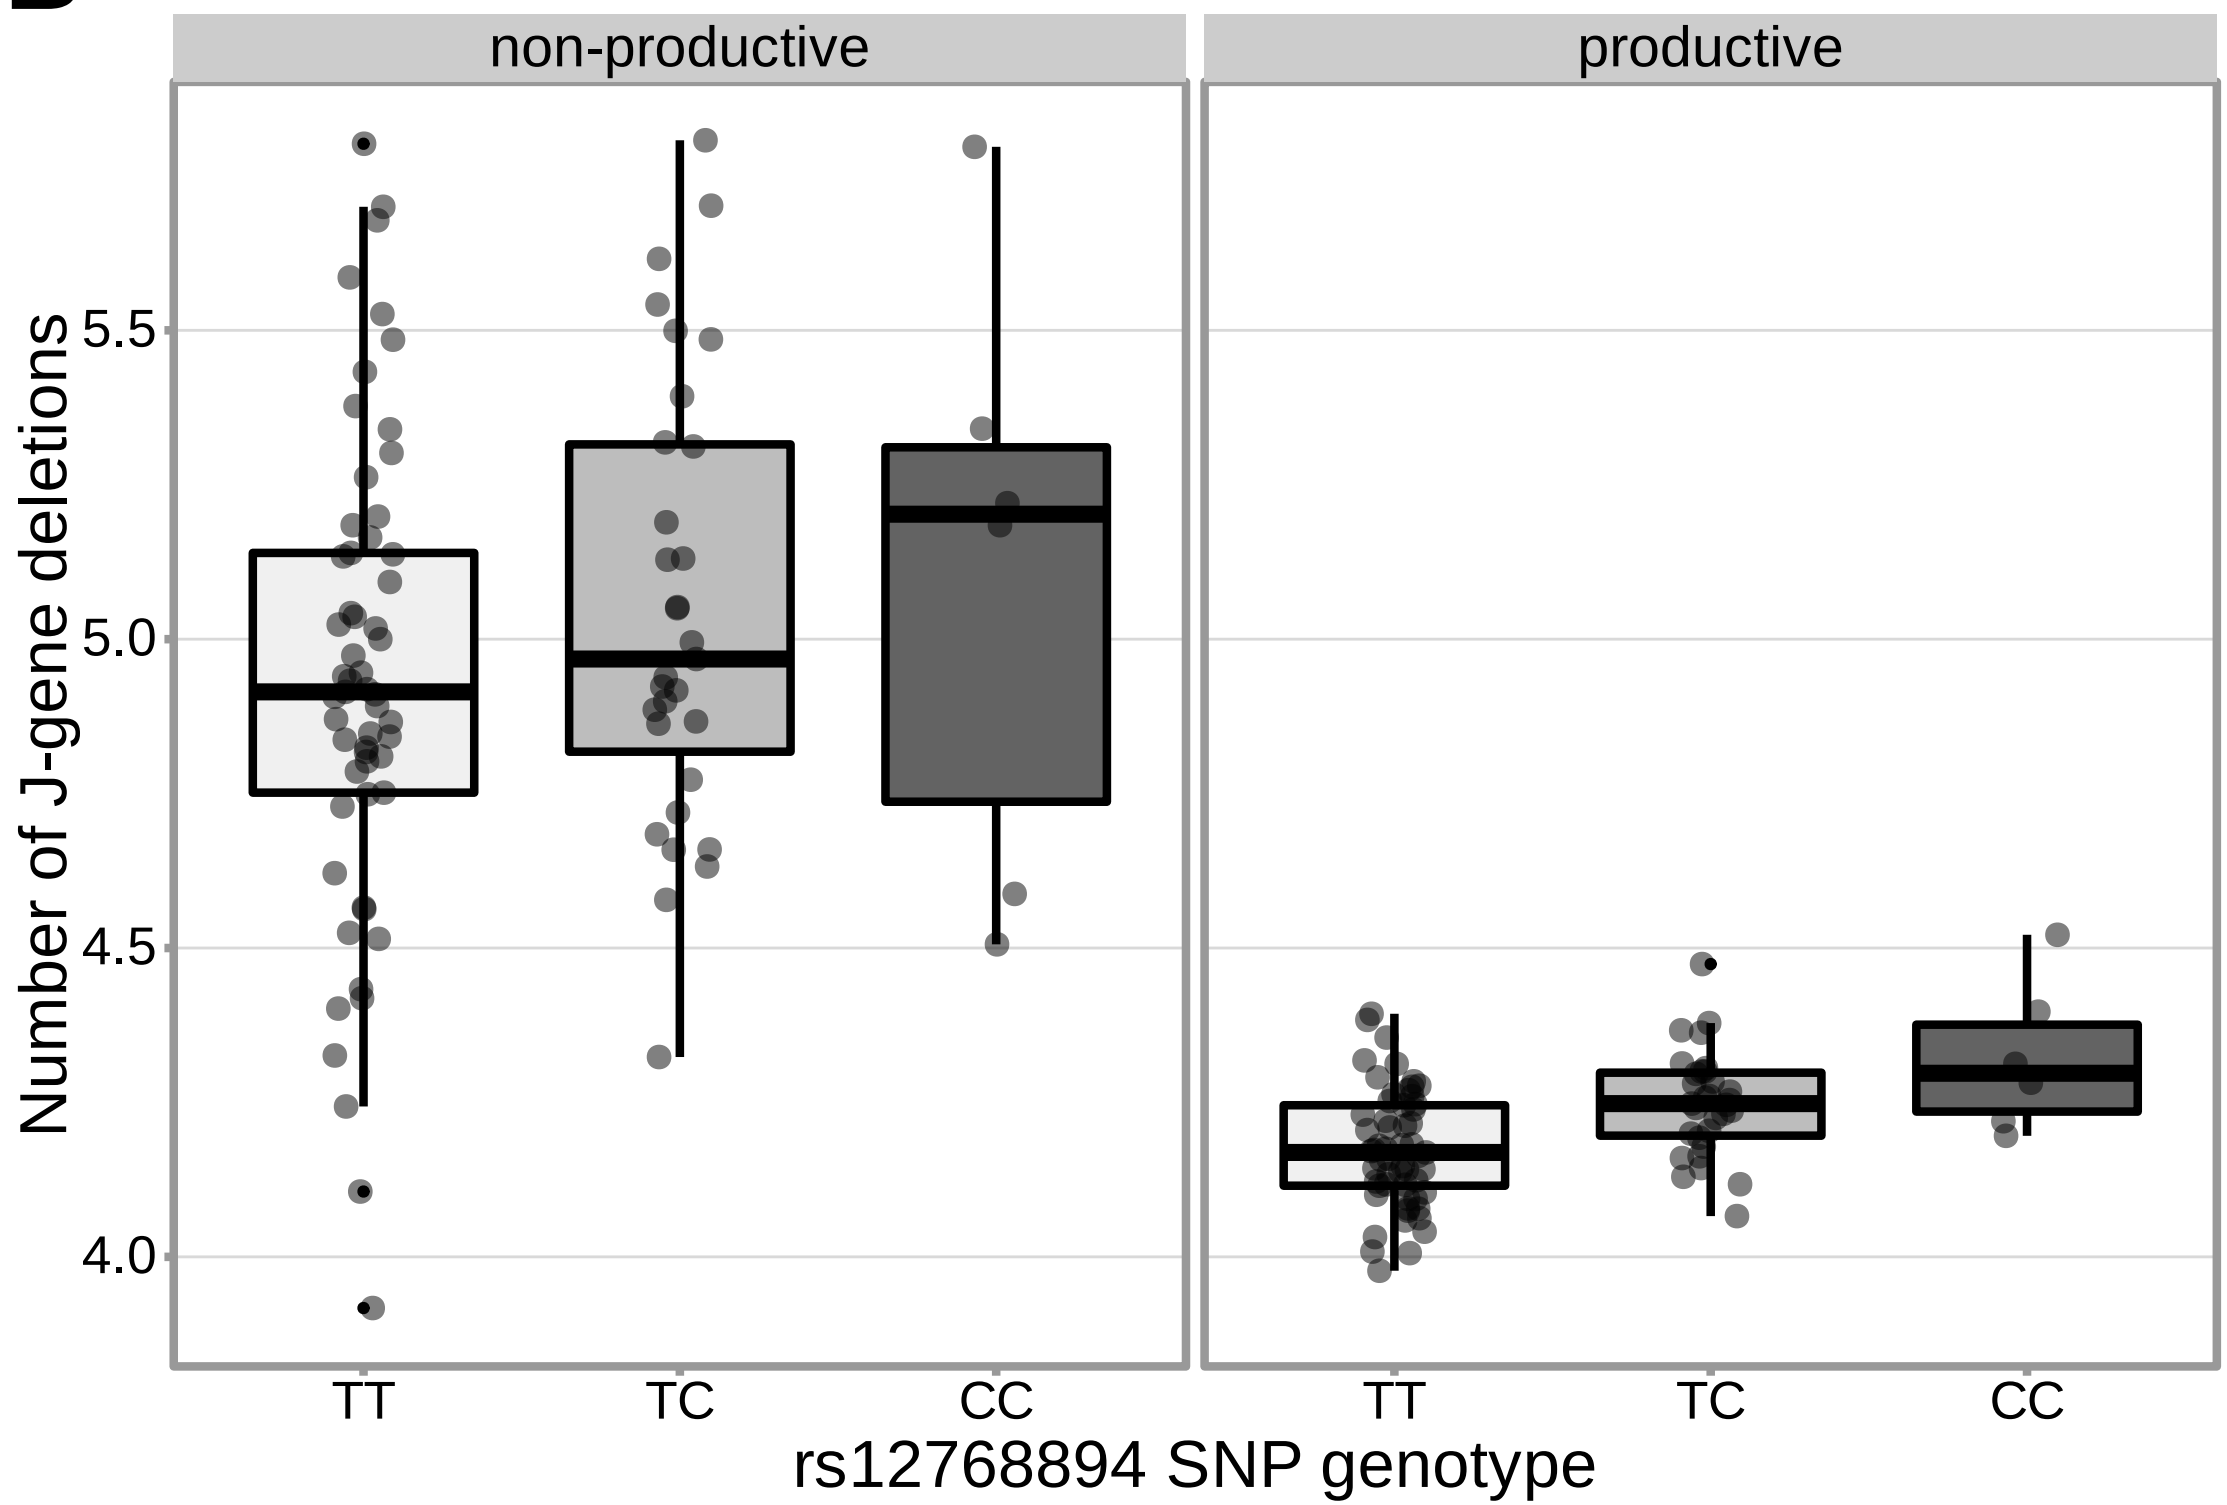

**A**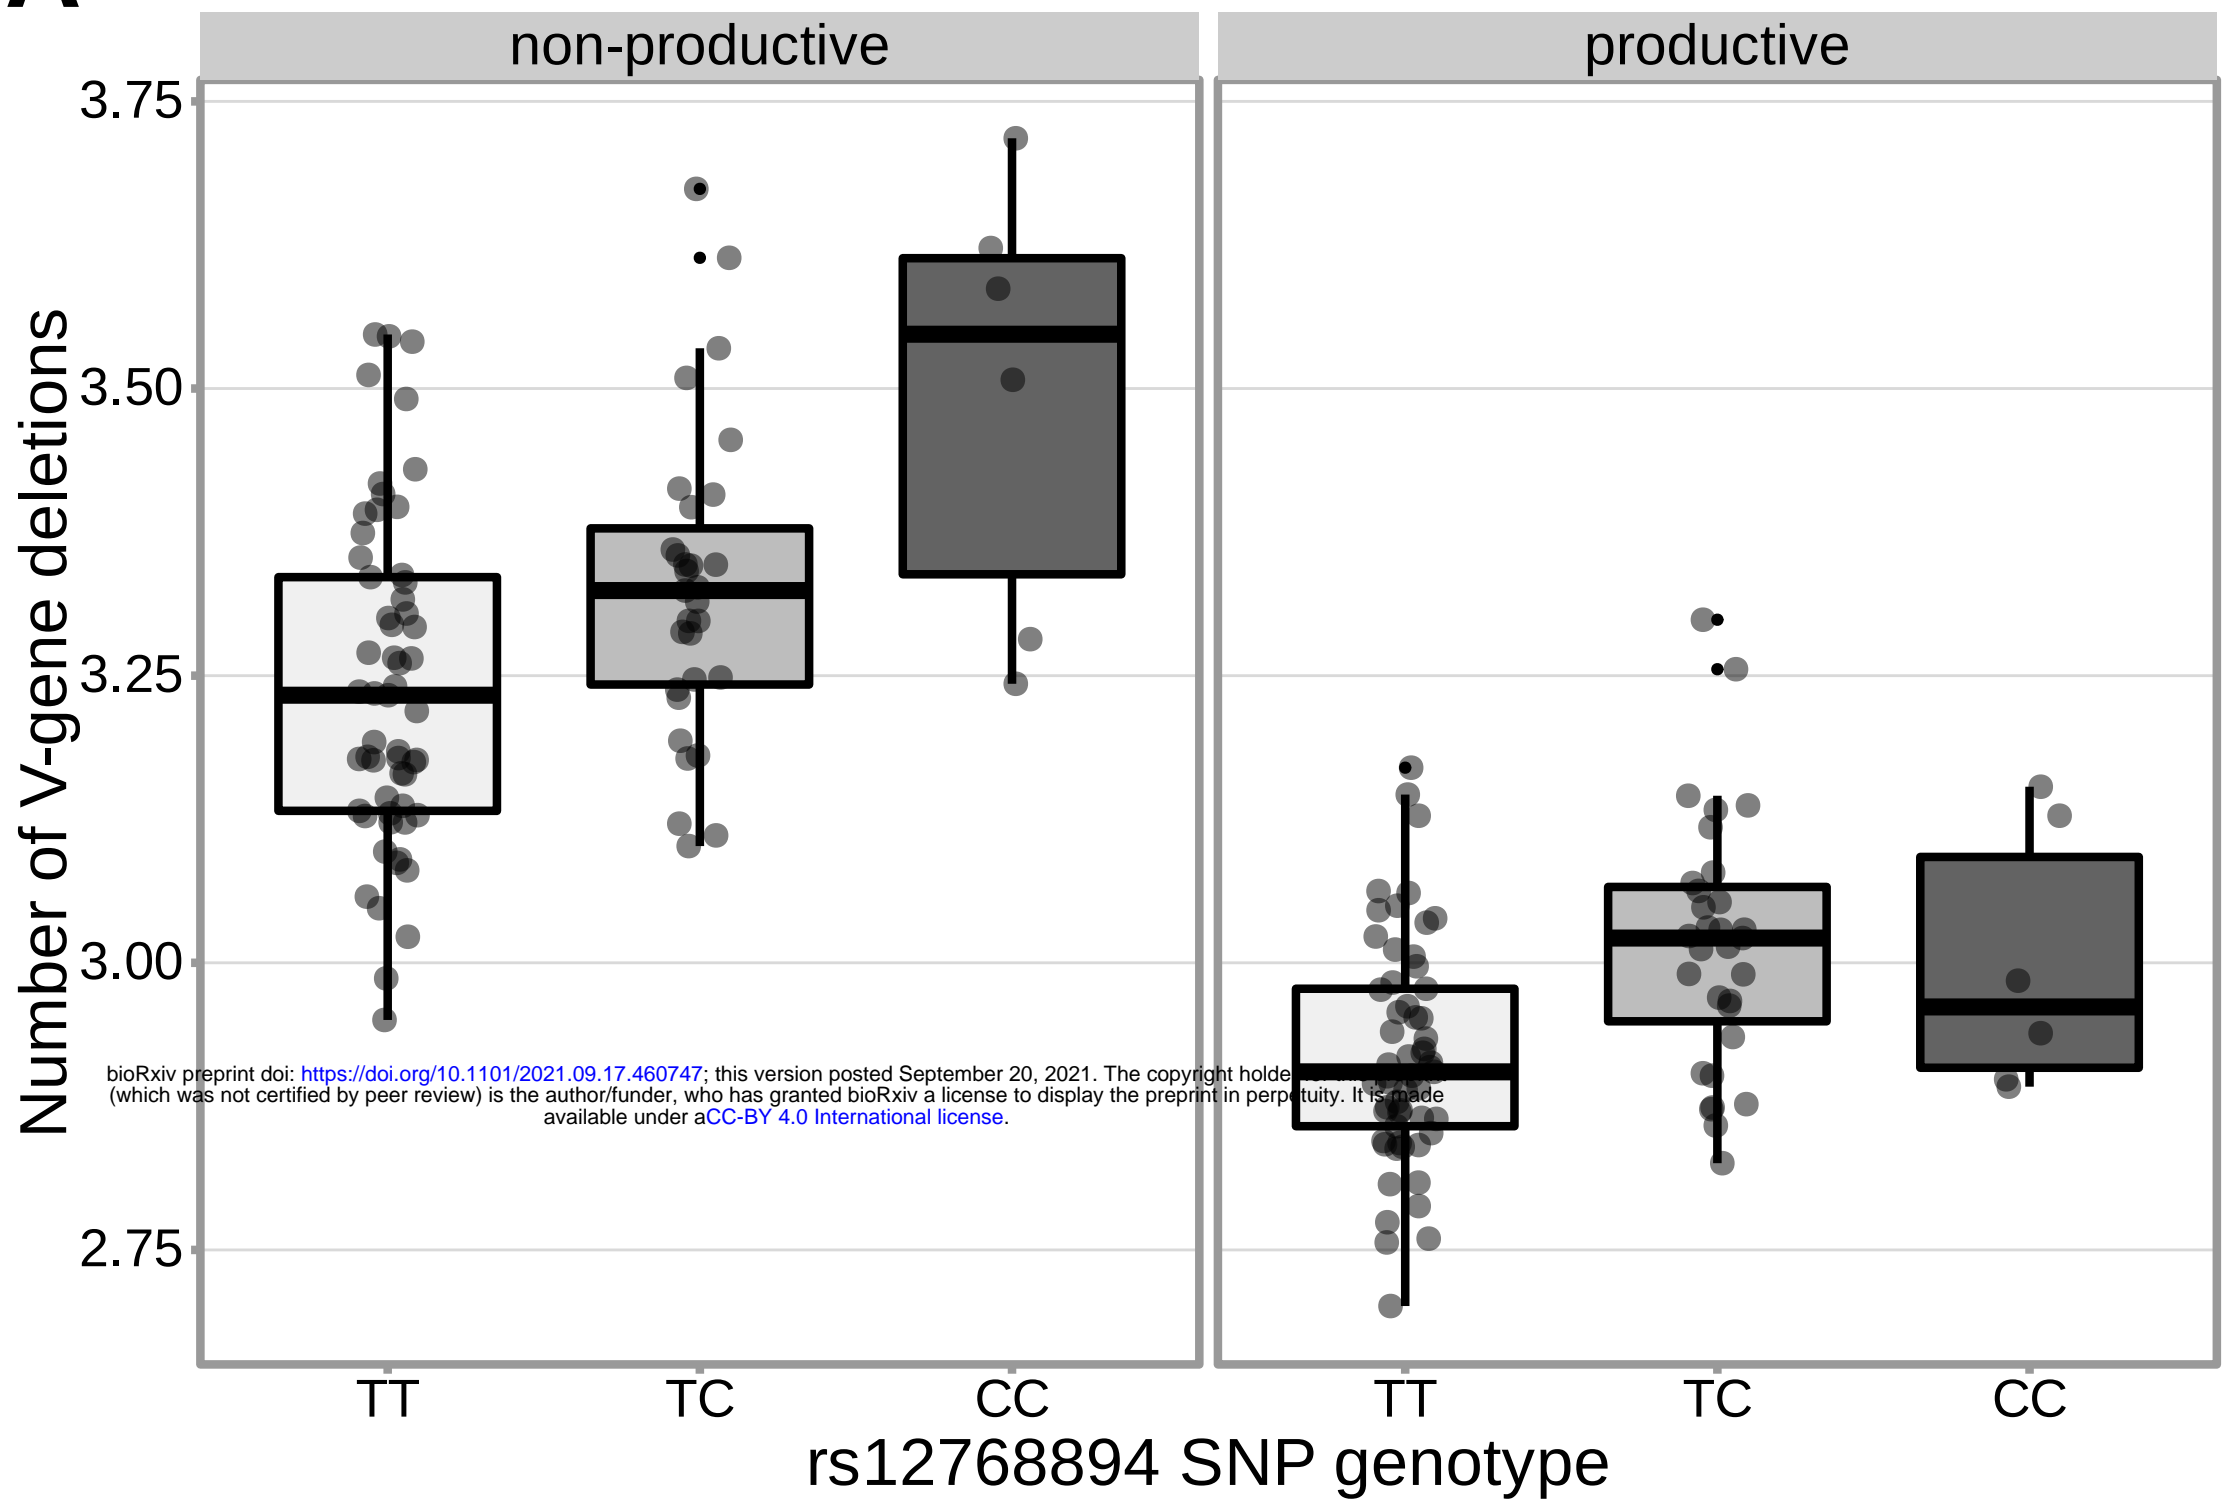**B**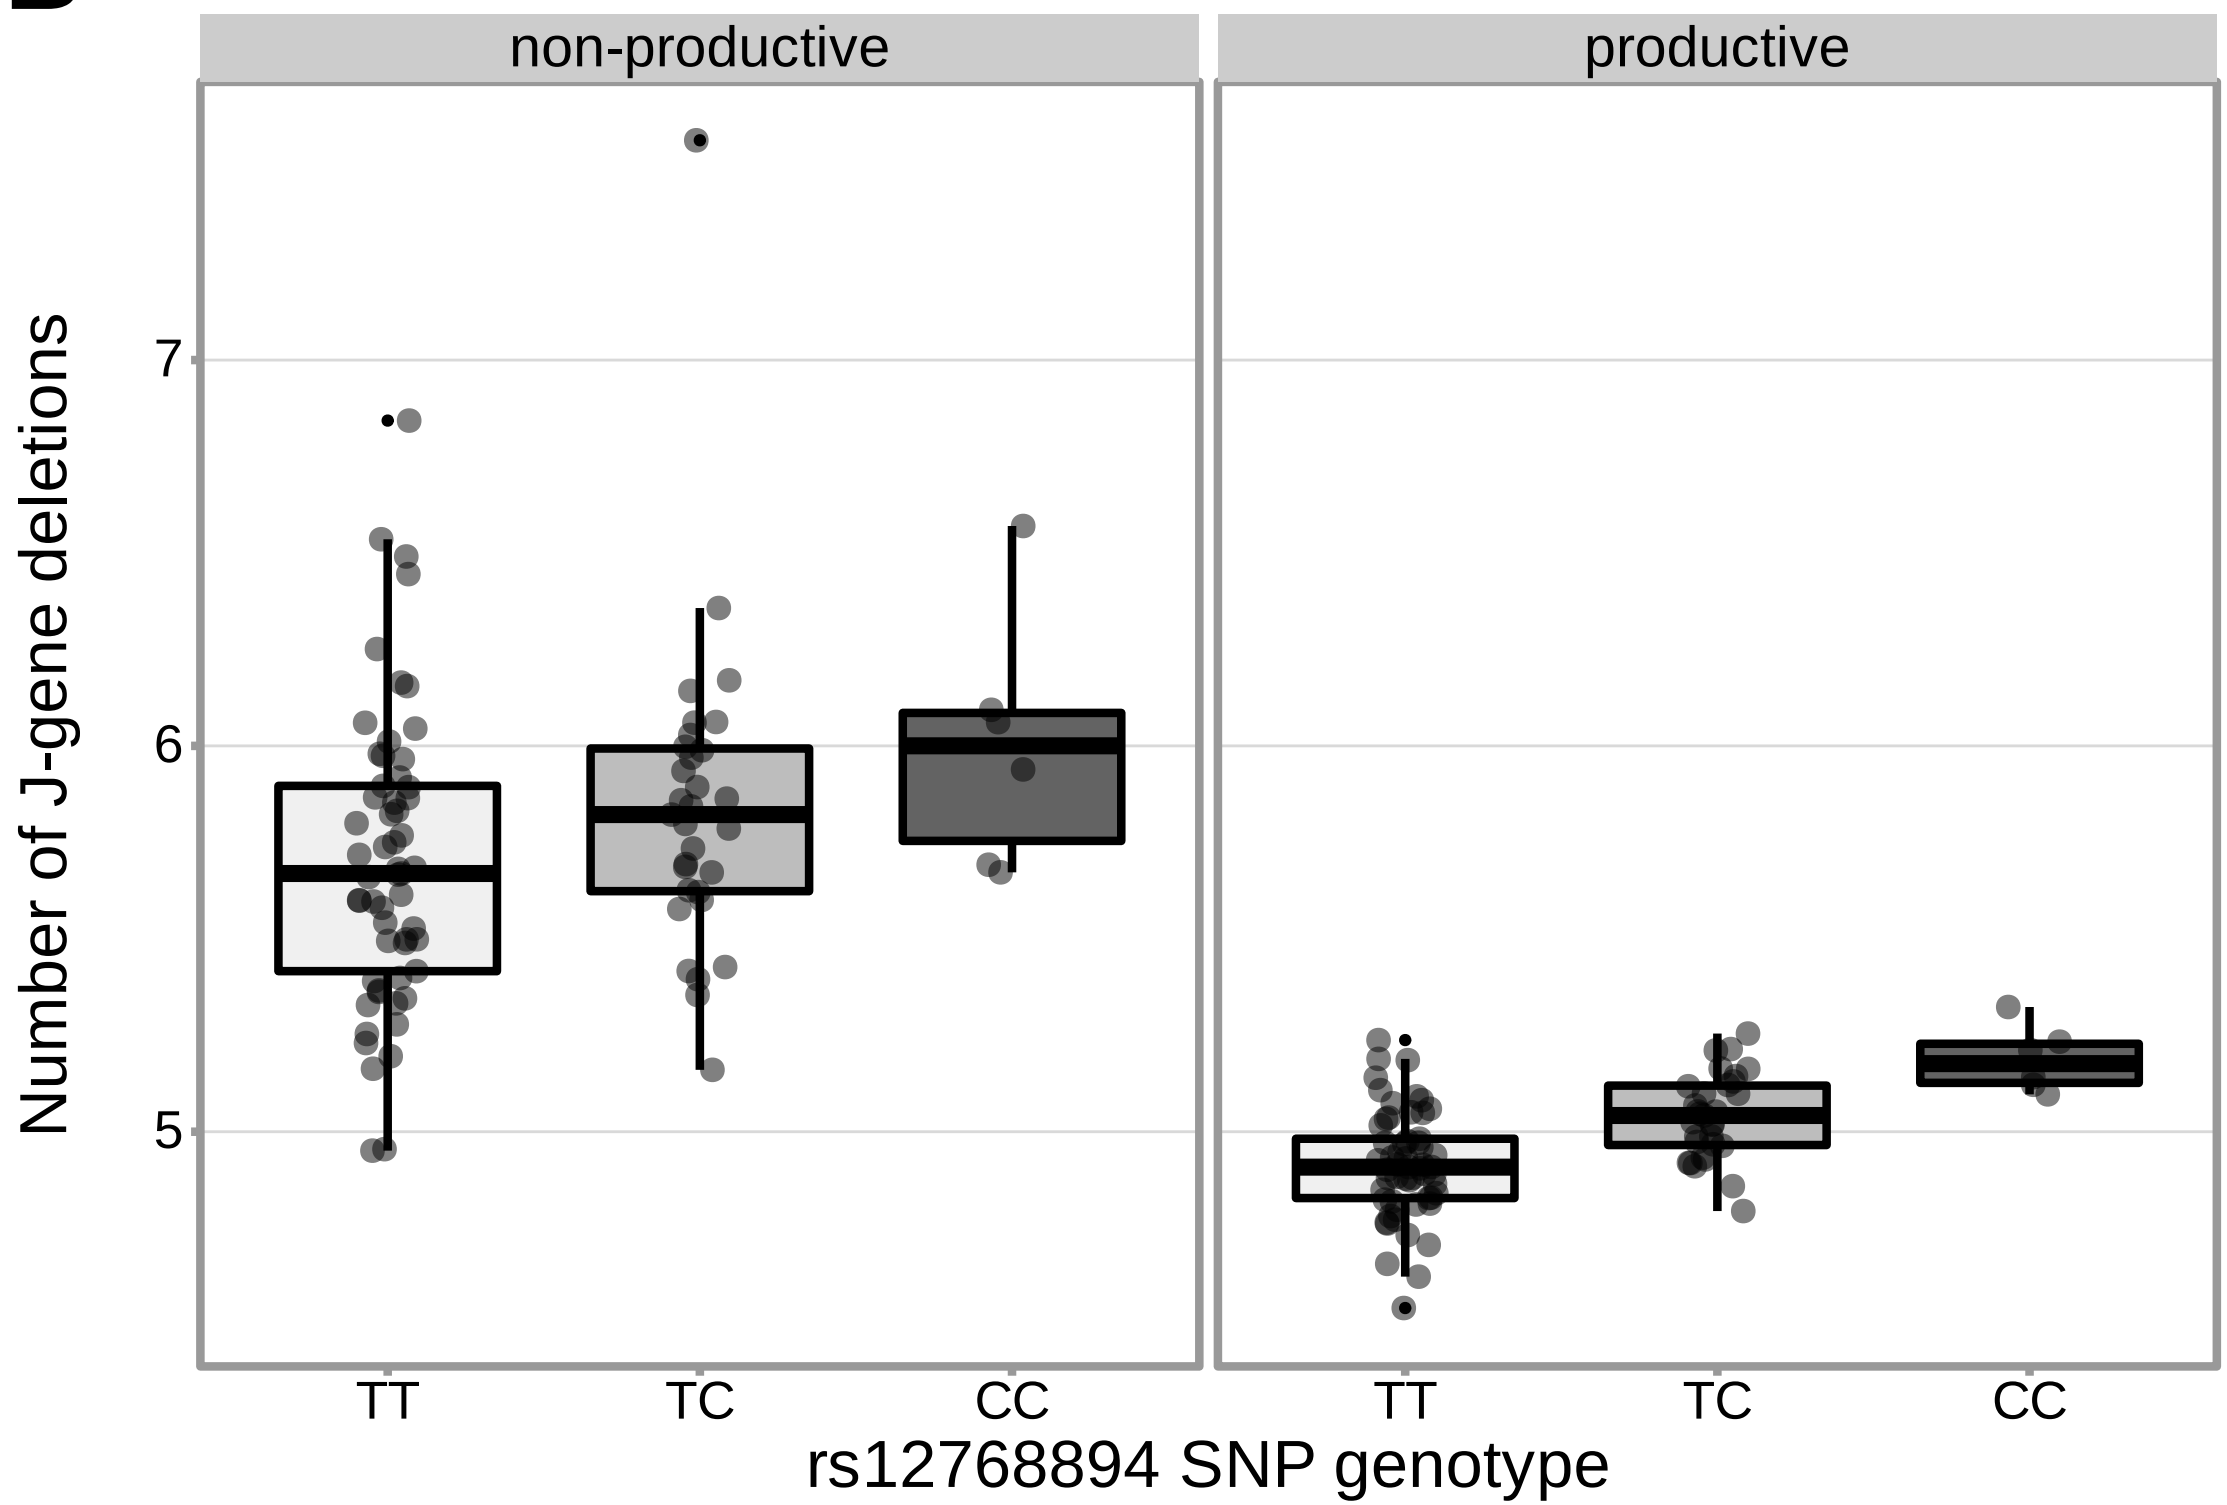

**A**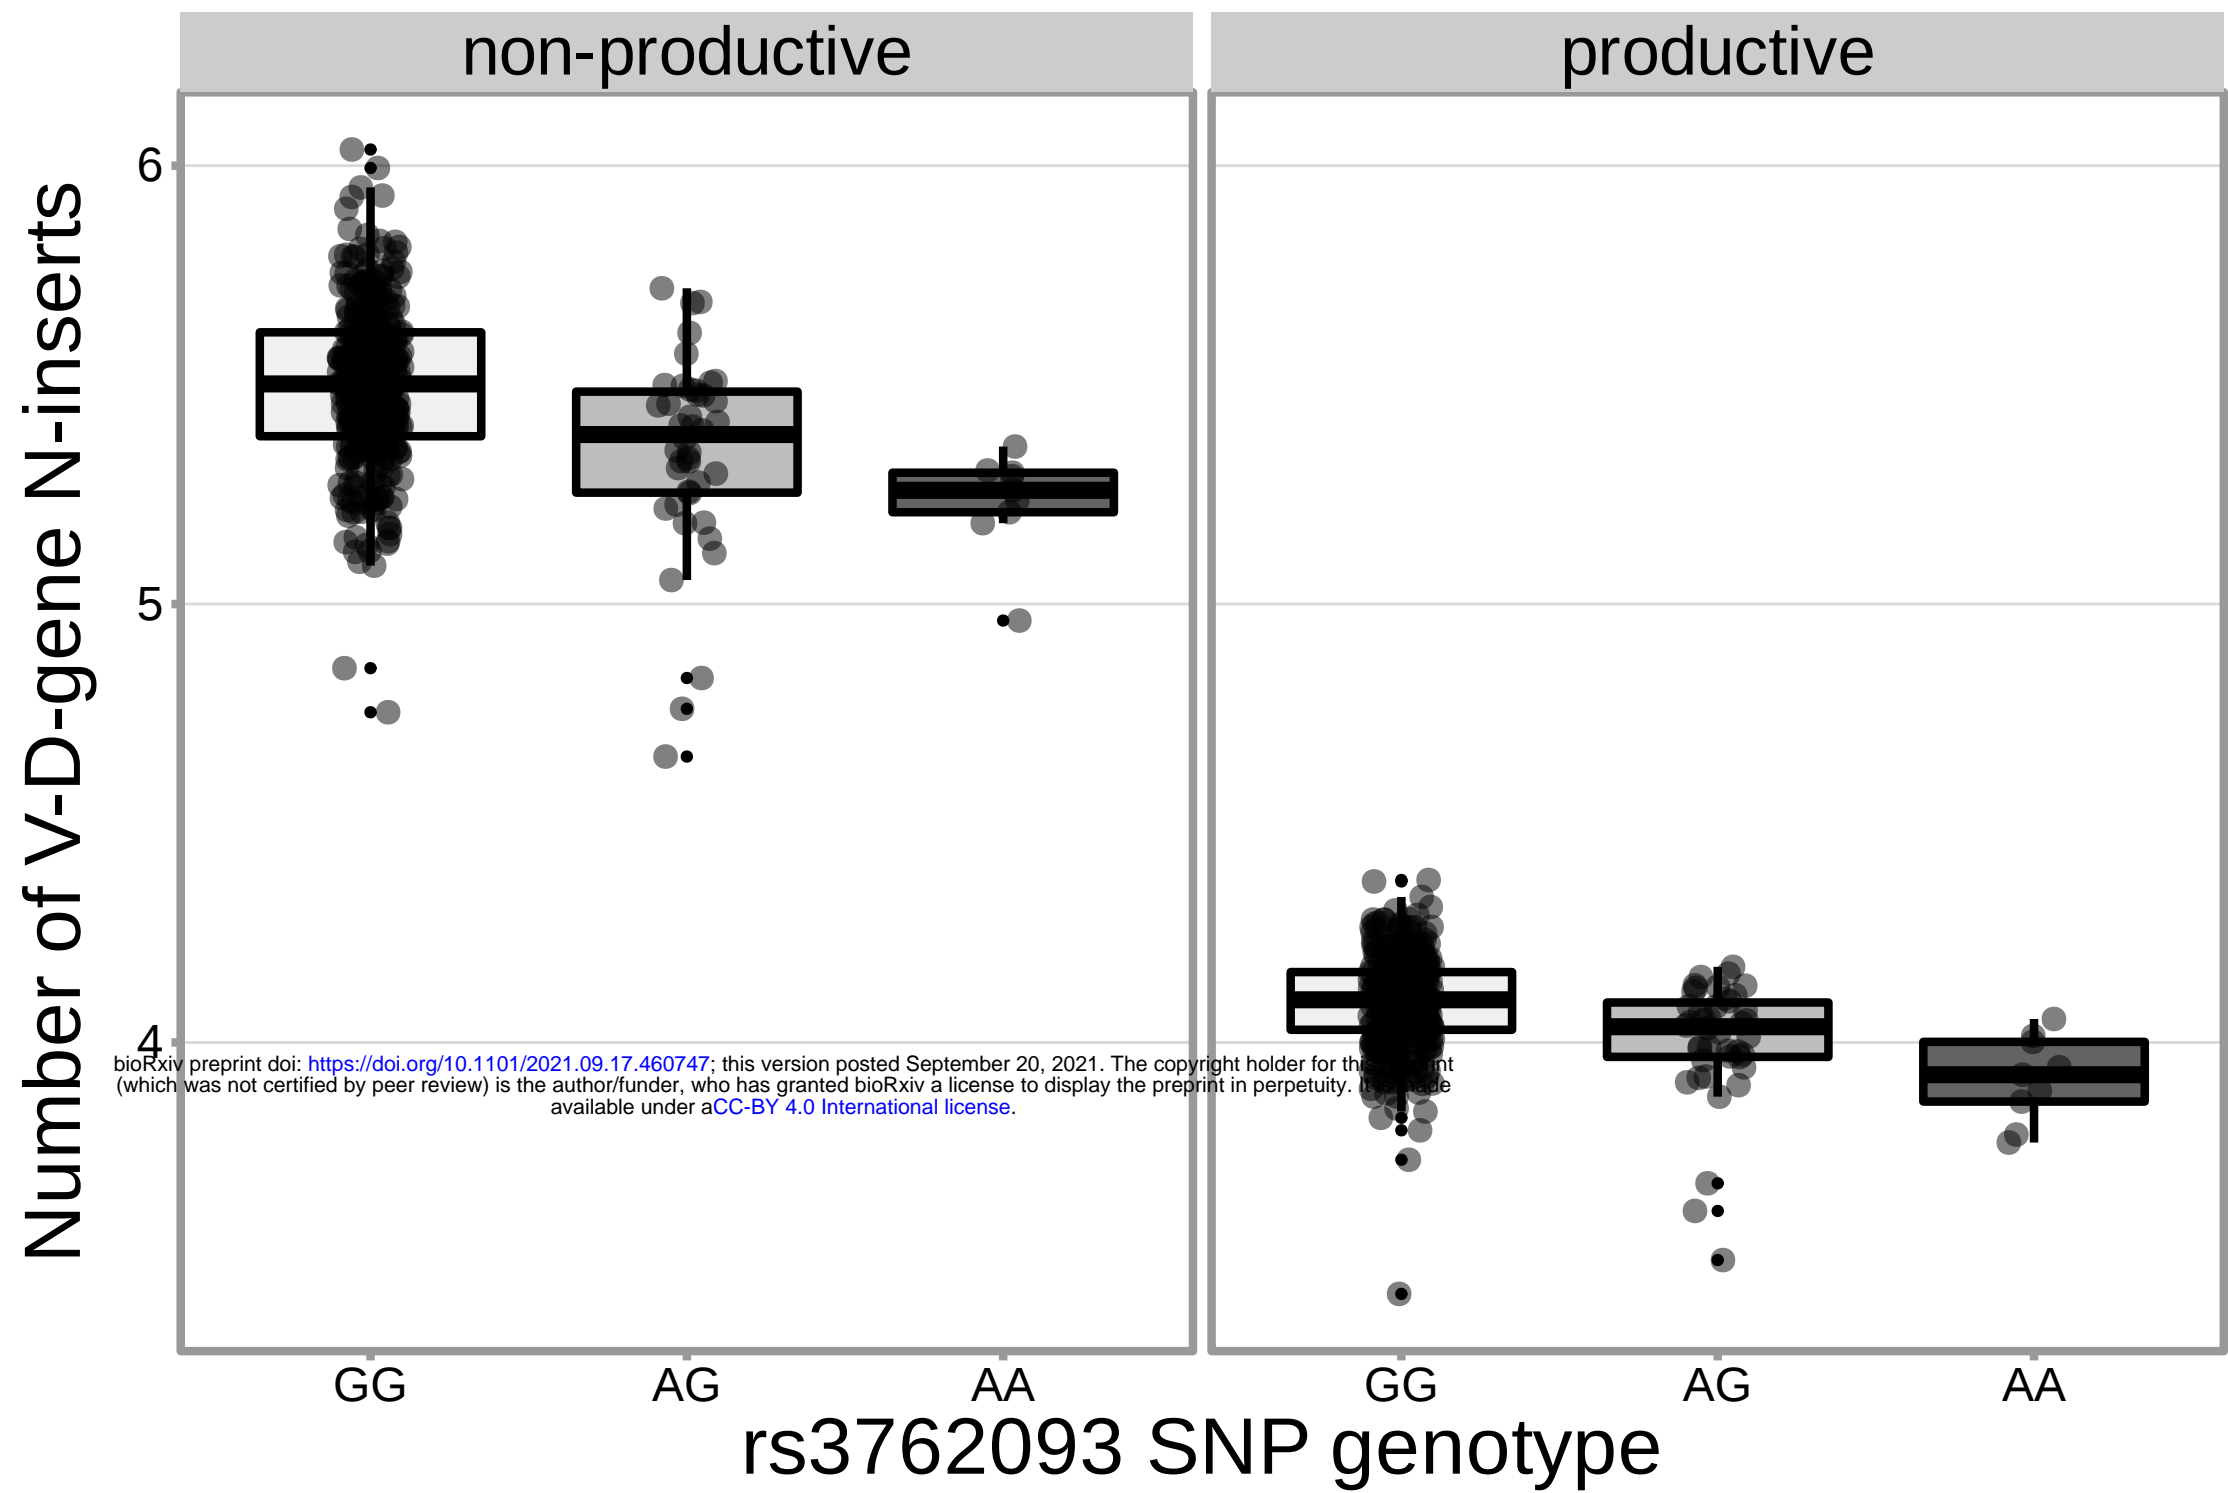**B**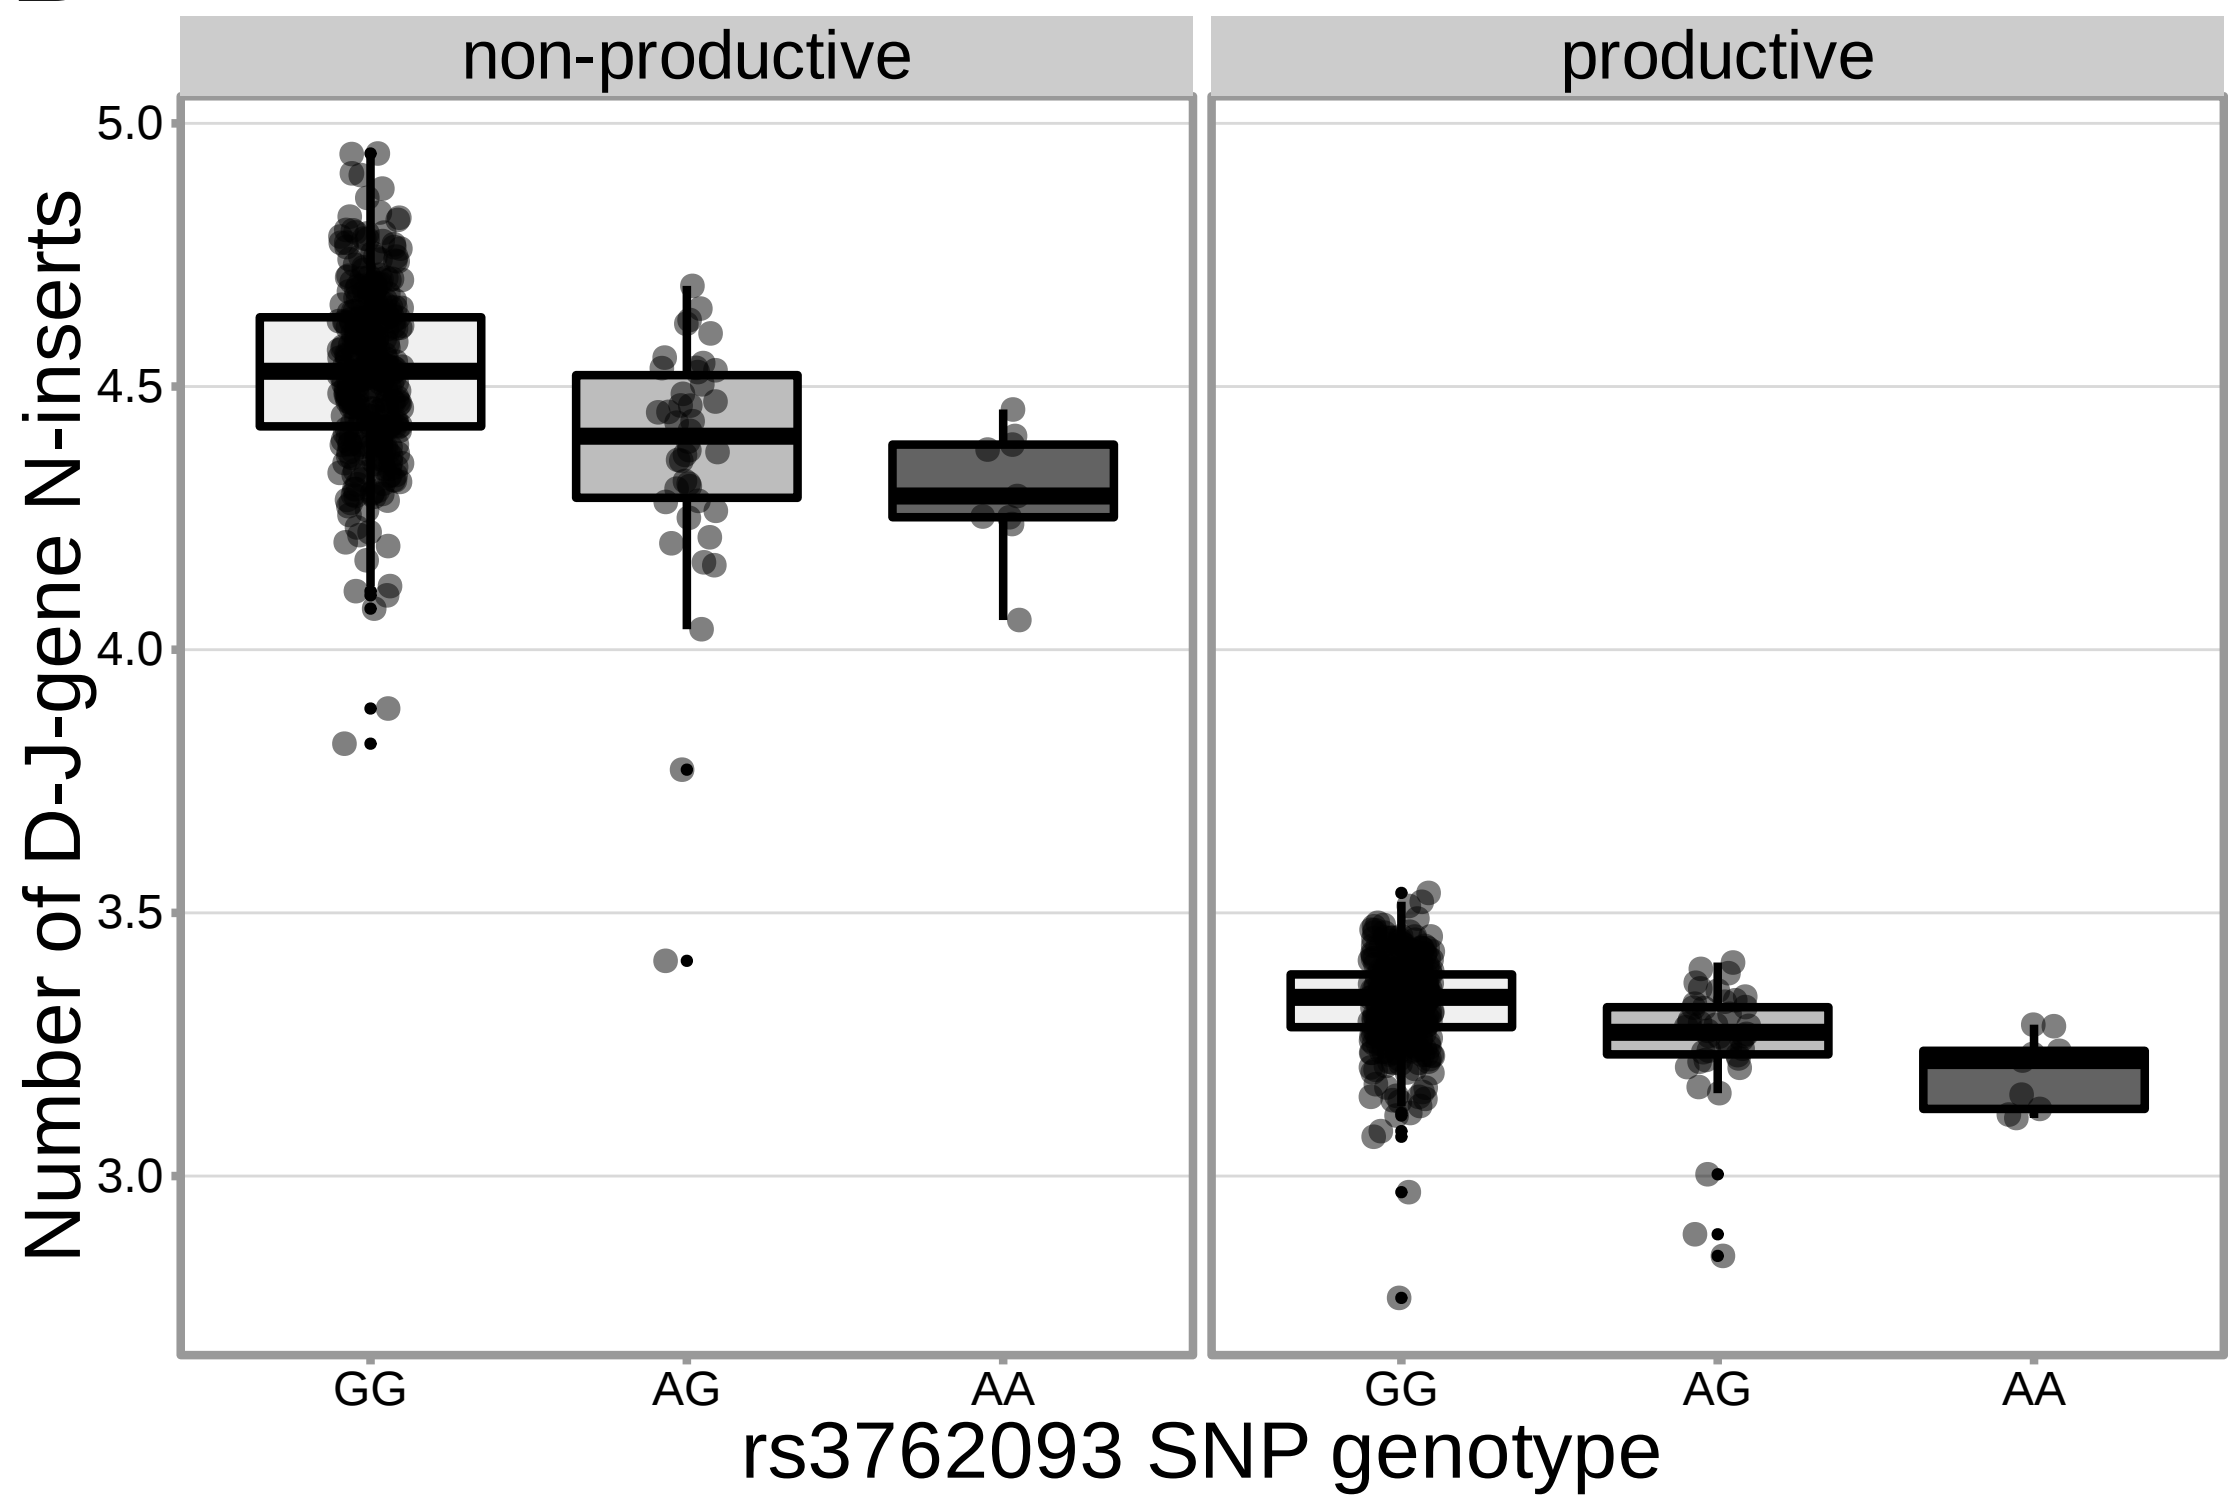

**A**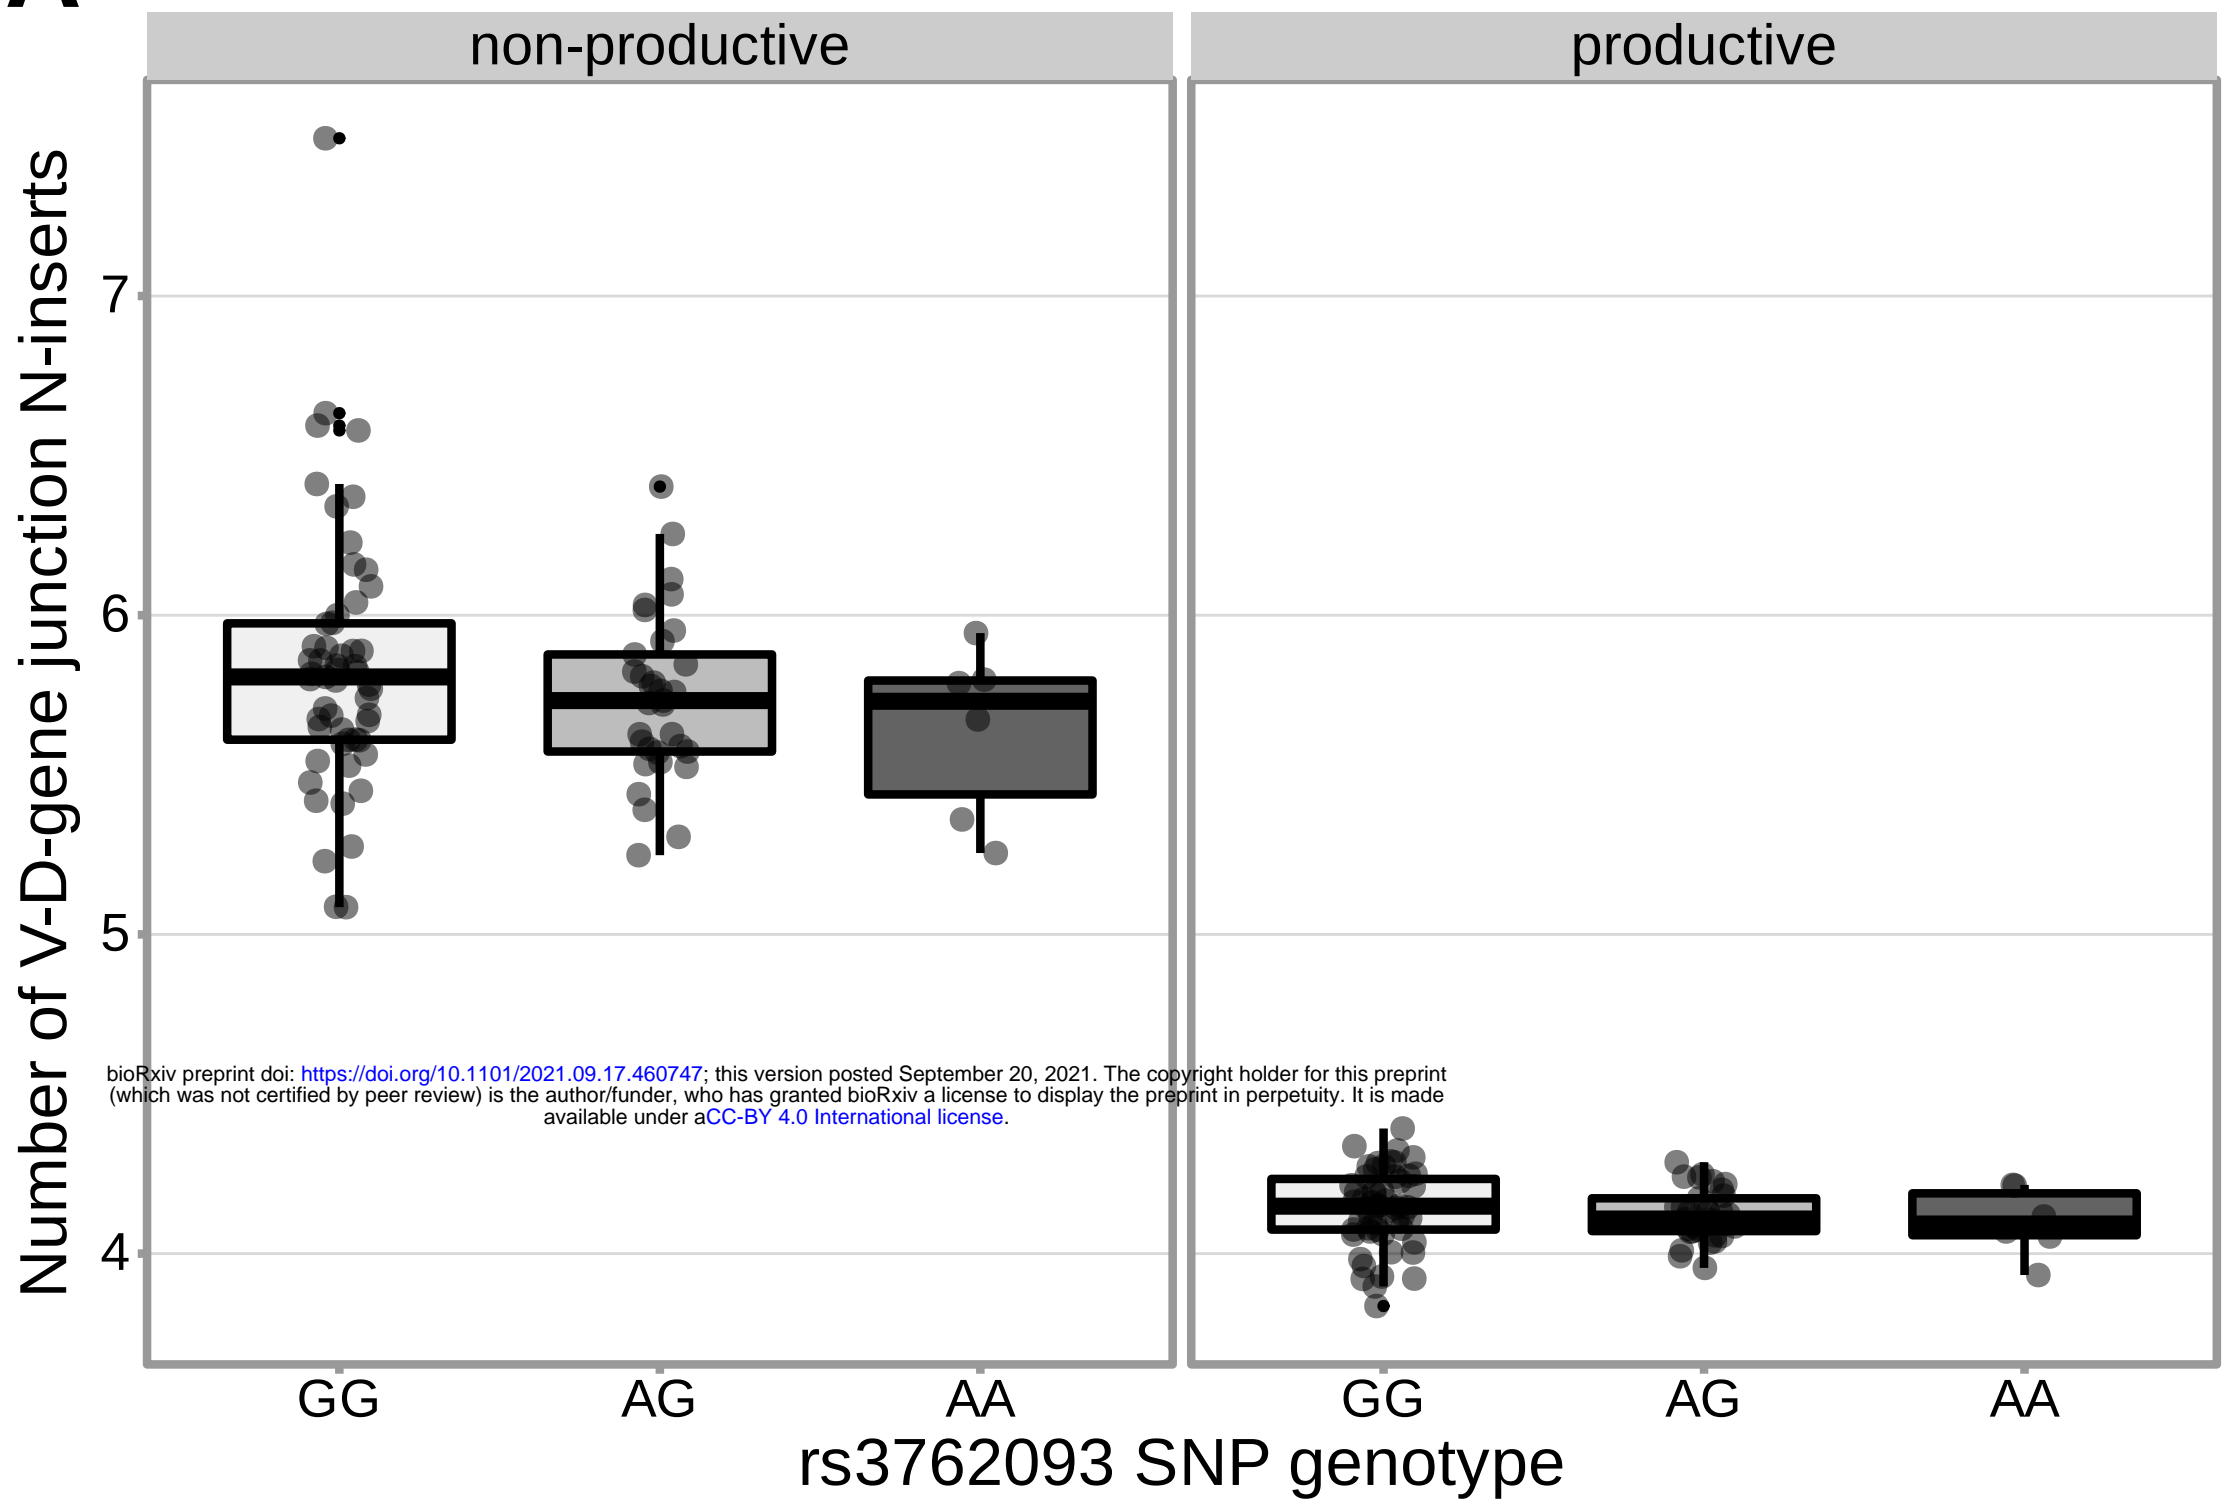**B**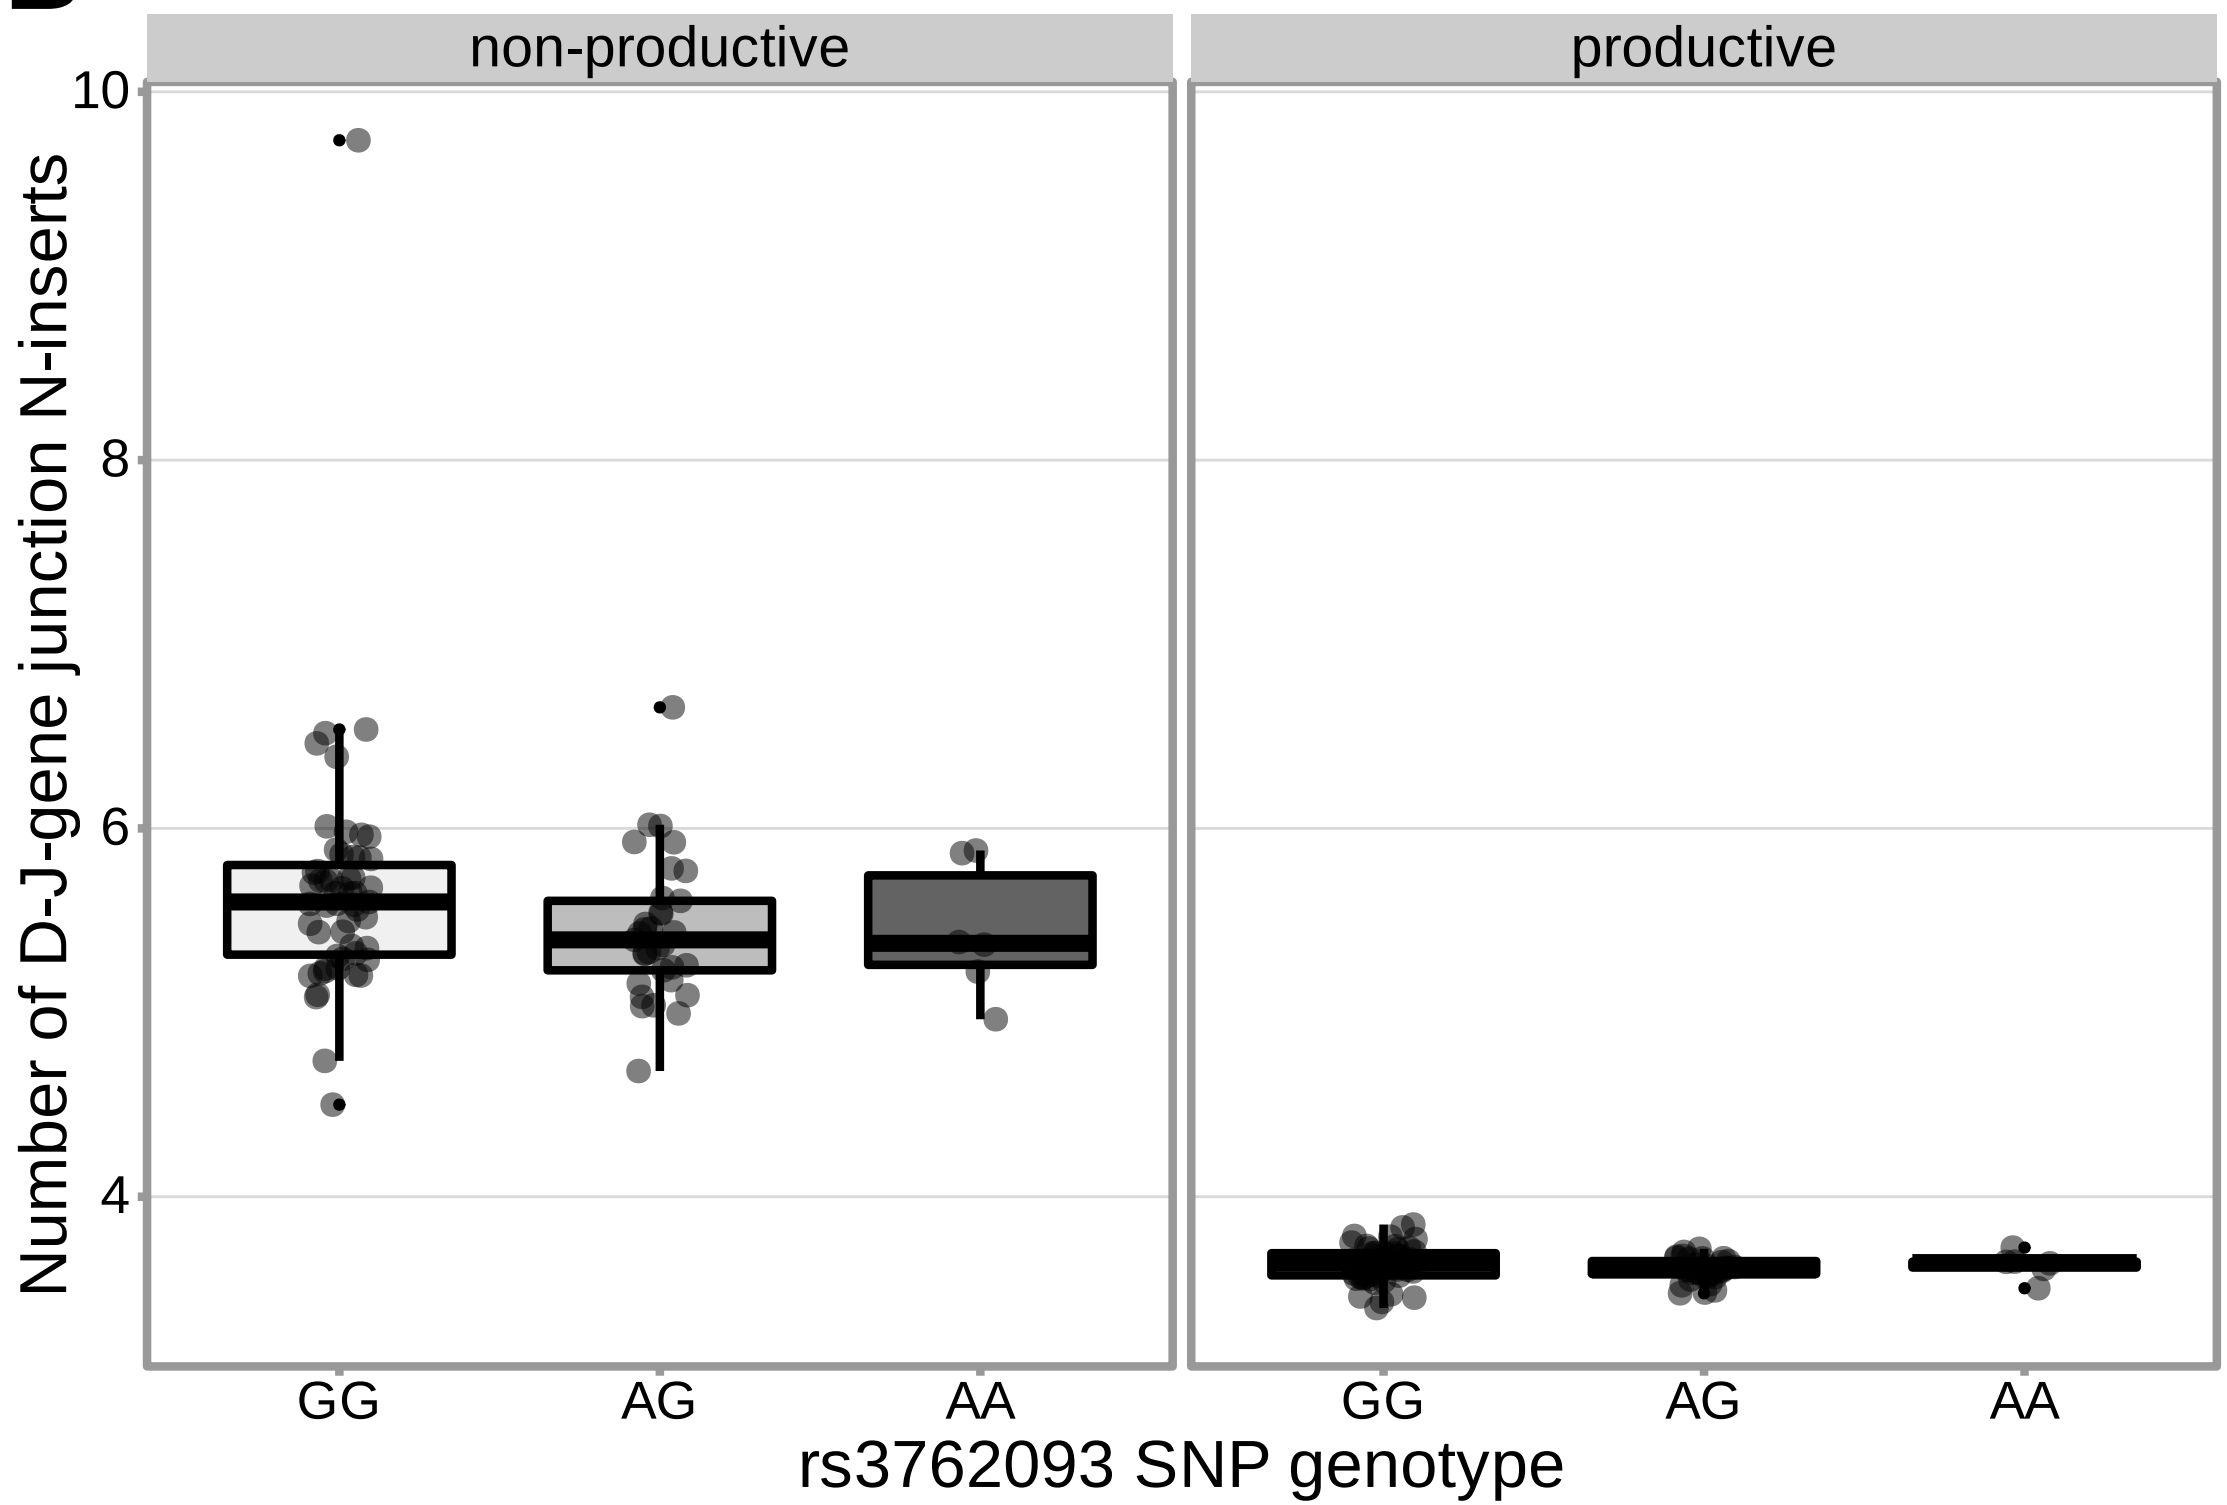

Number of V-J-gene junction N-inserts

non-productive

productive

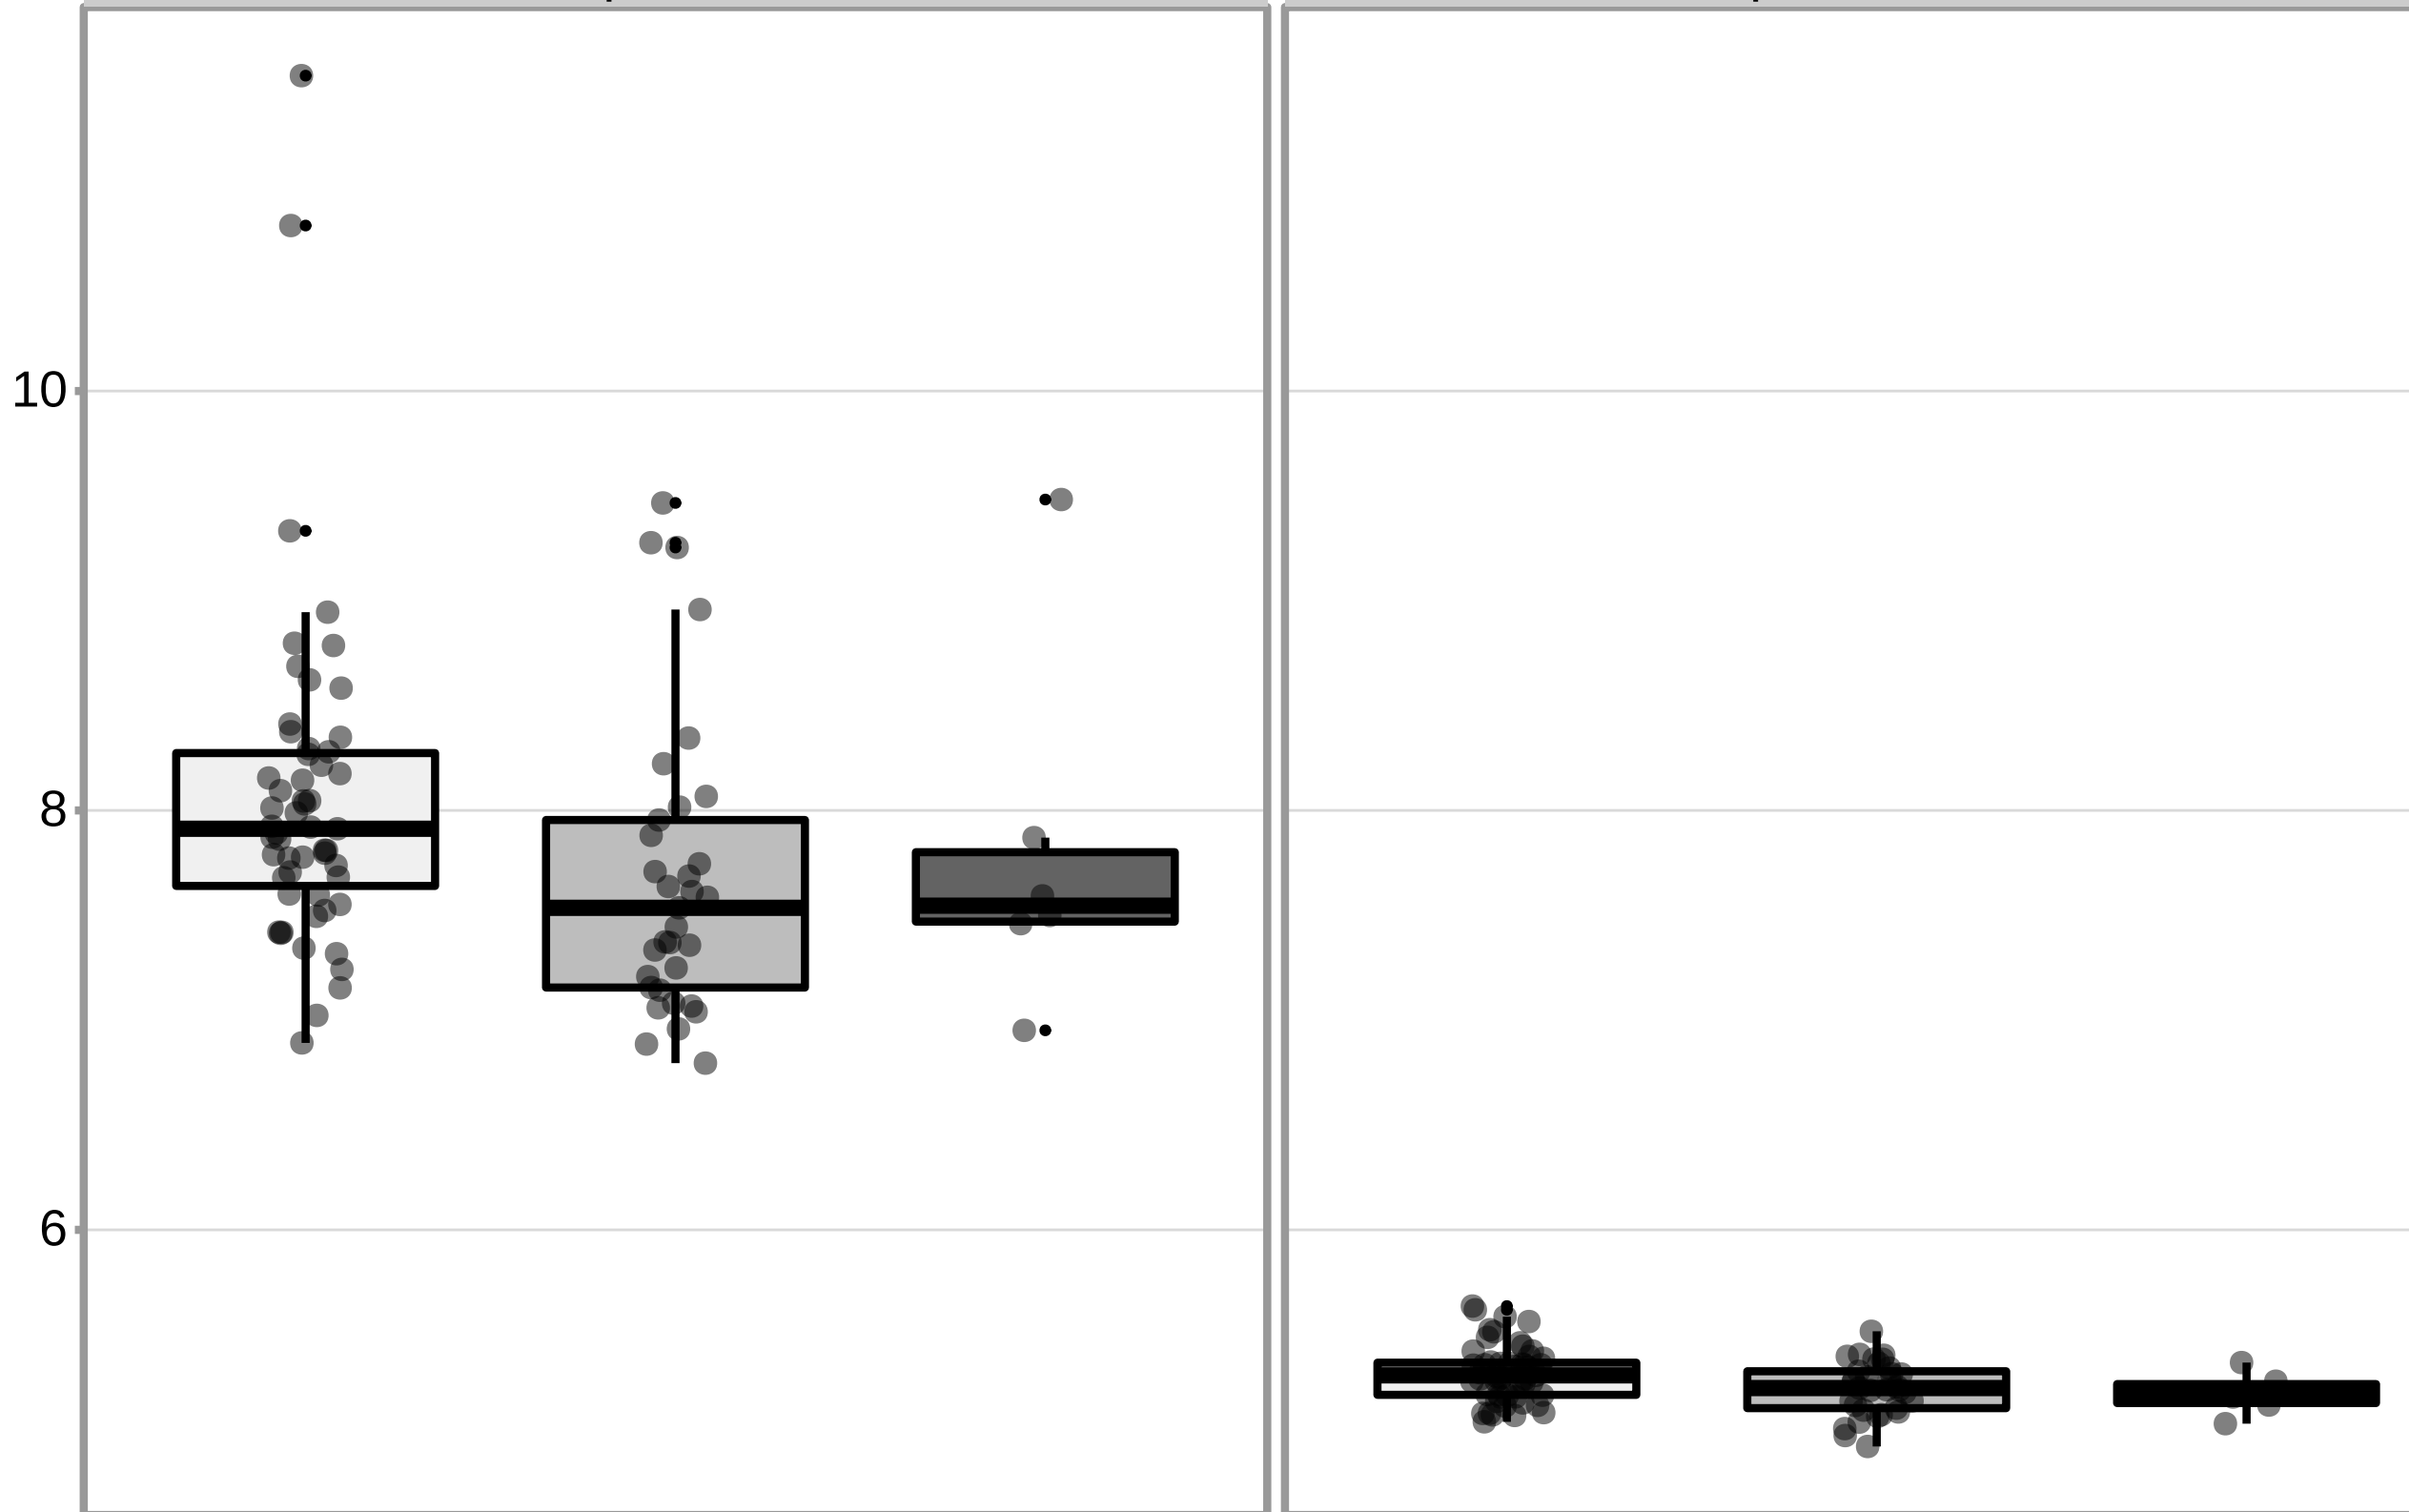

GG

AG

AA

GG

AG

AA

rs3762093 SNP genotype



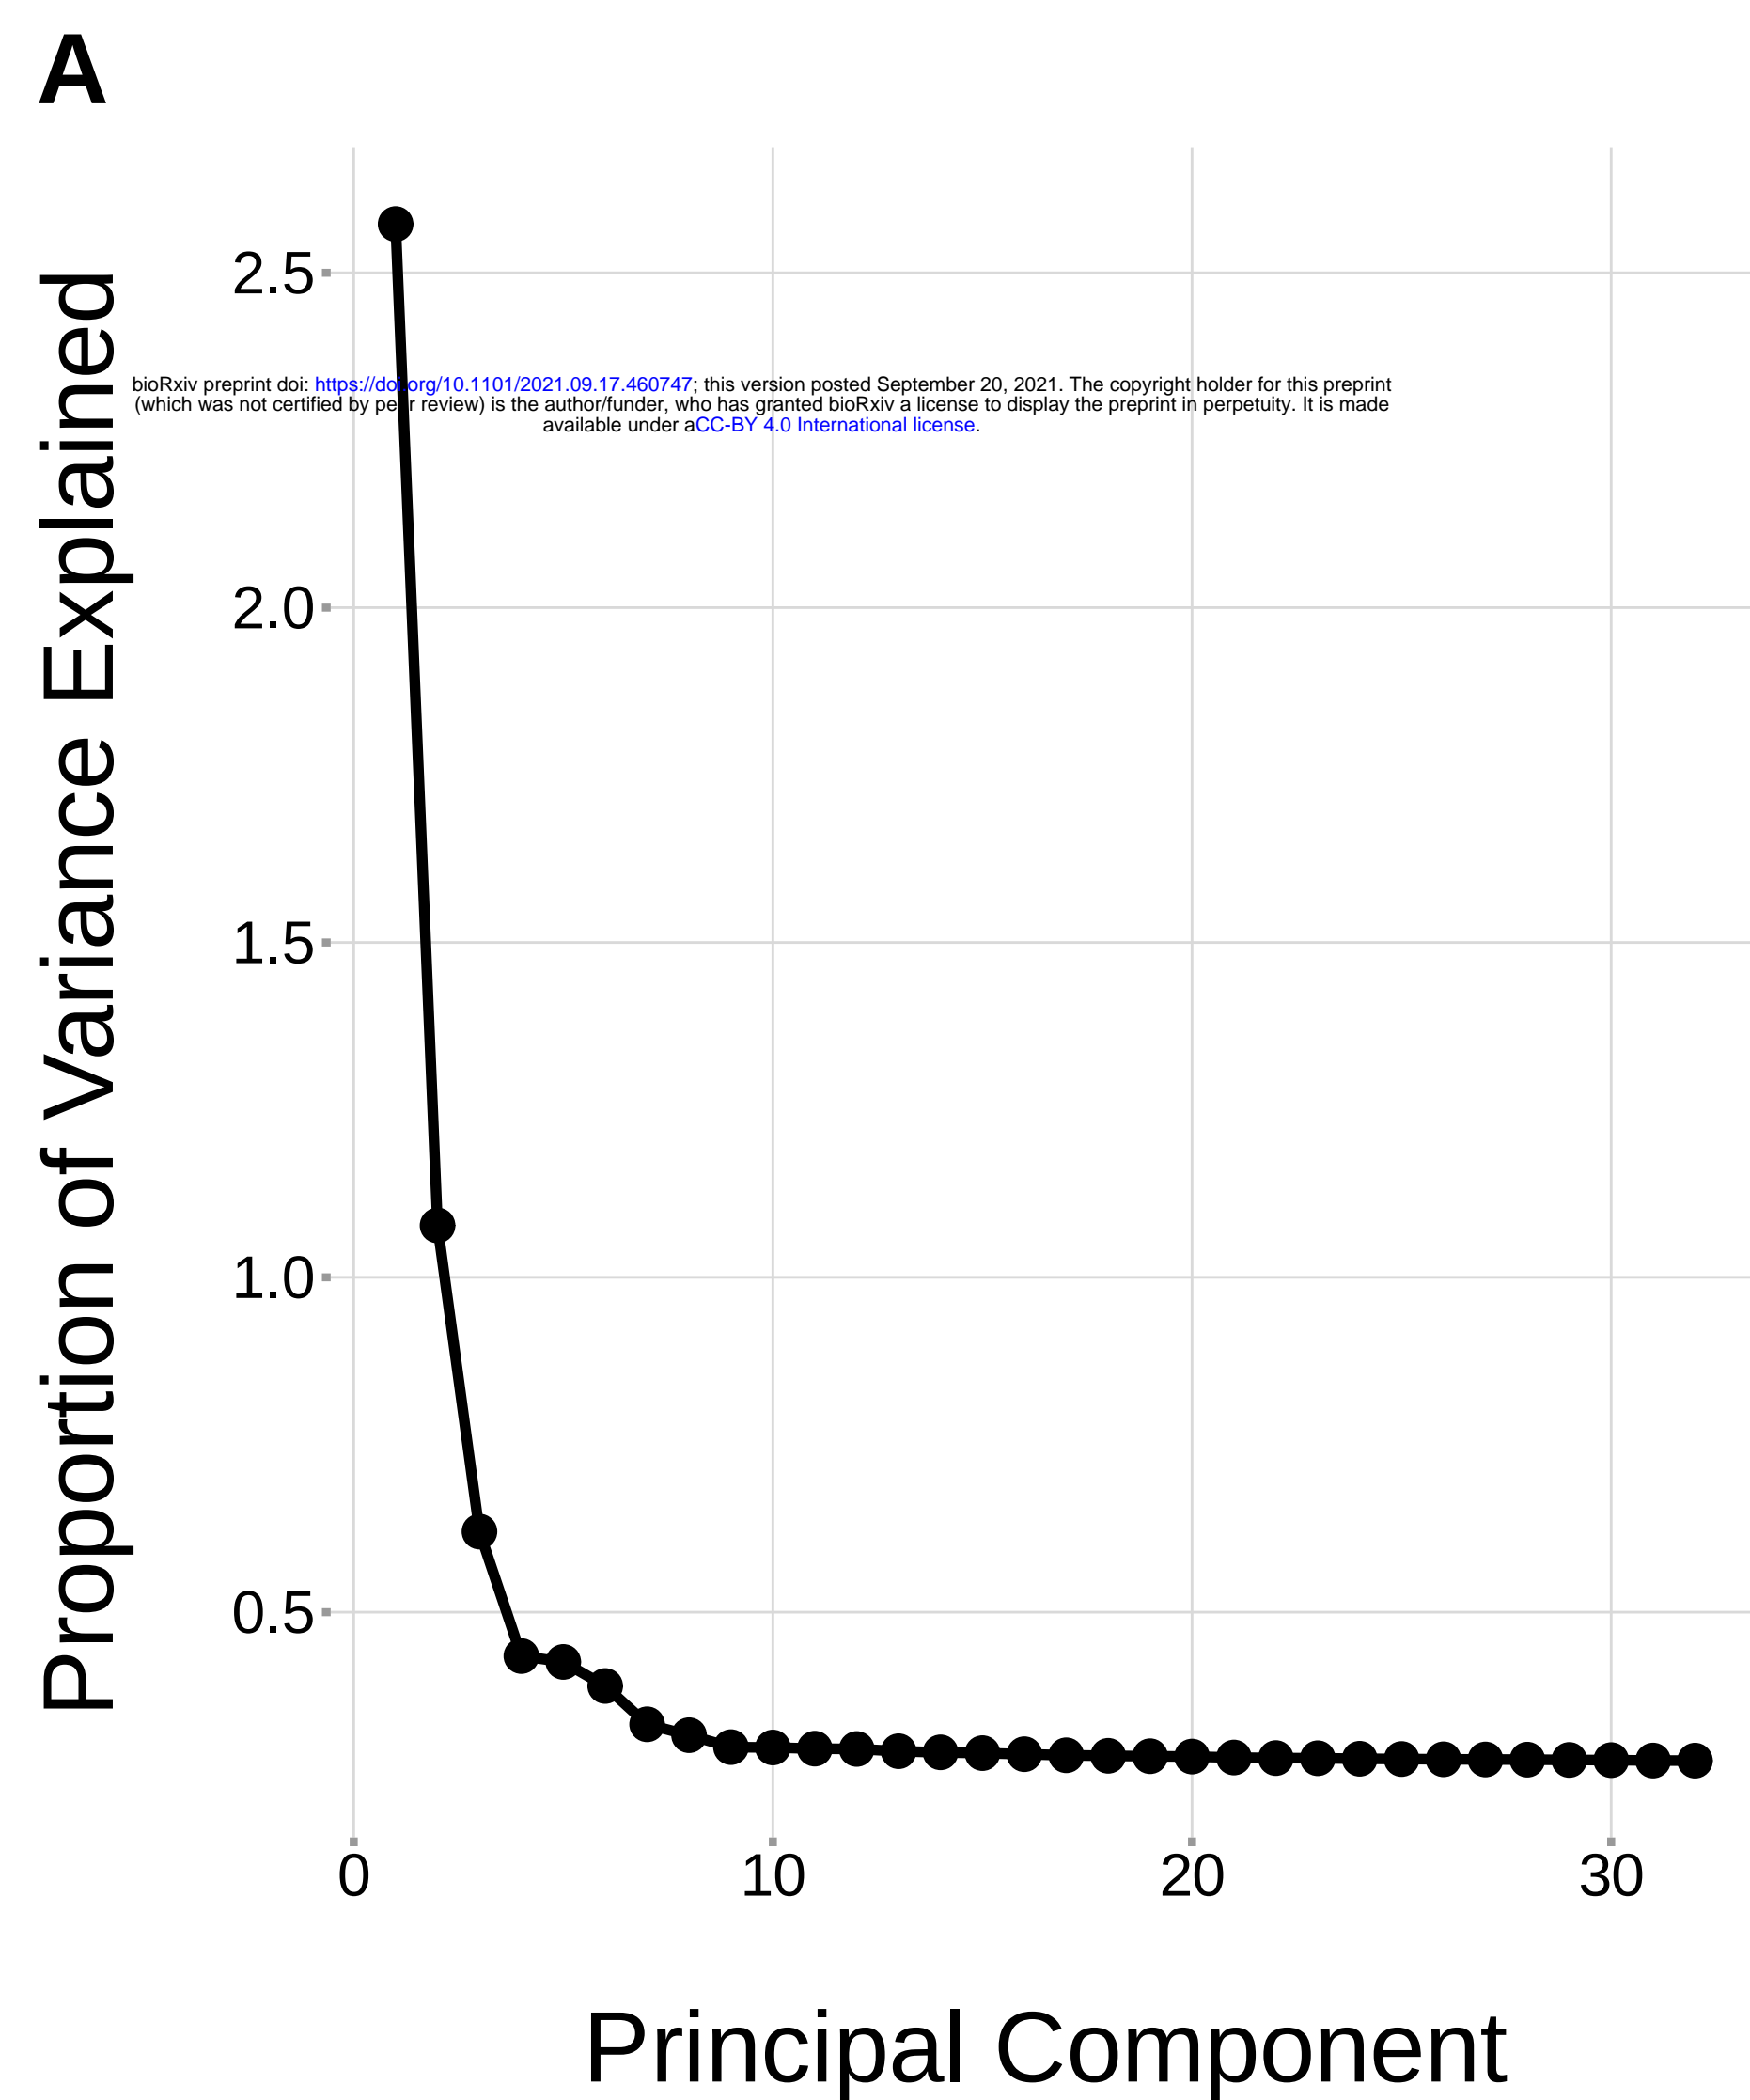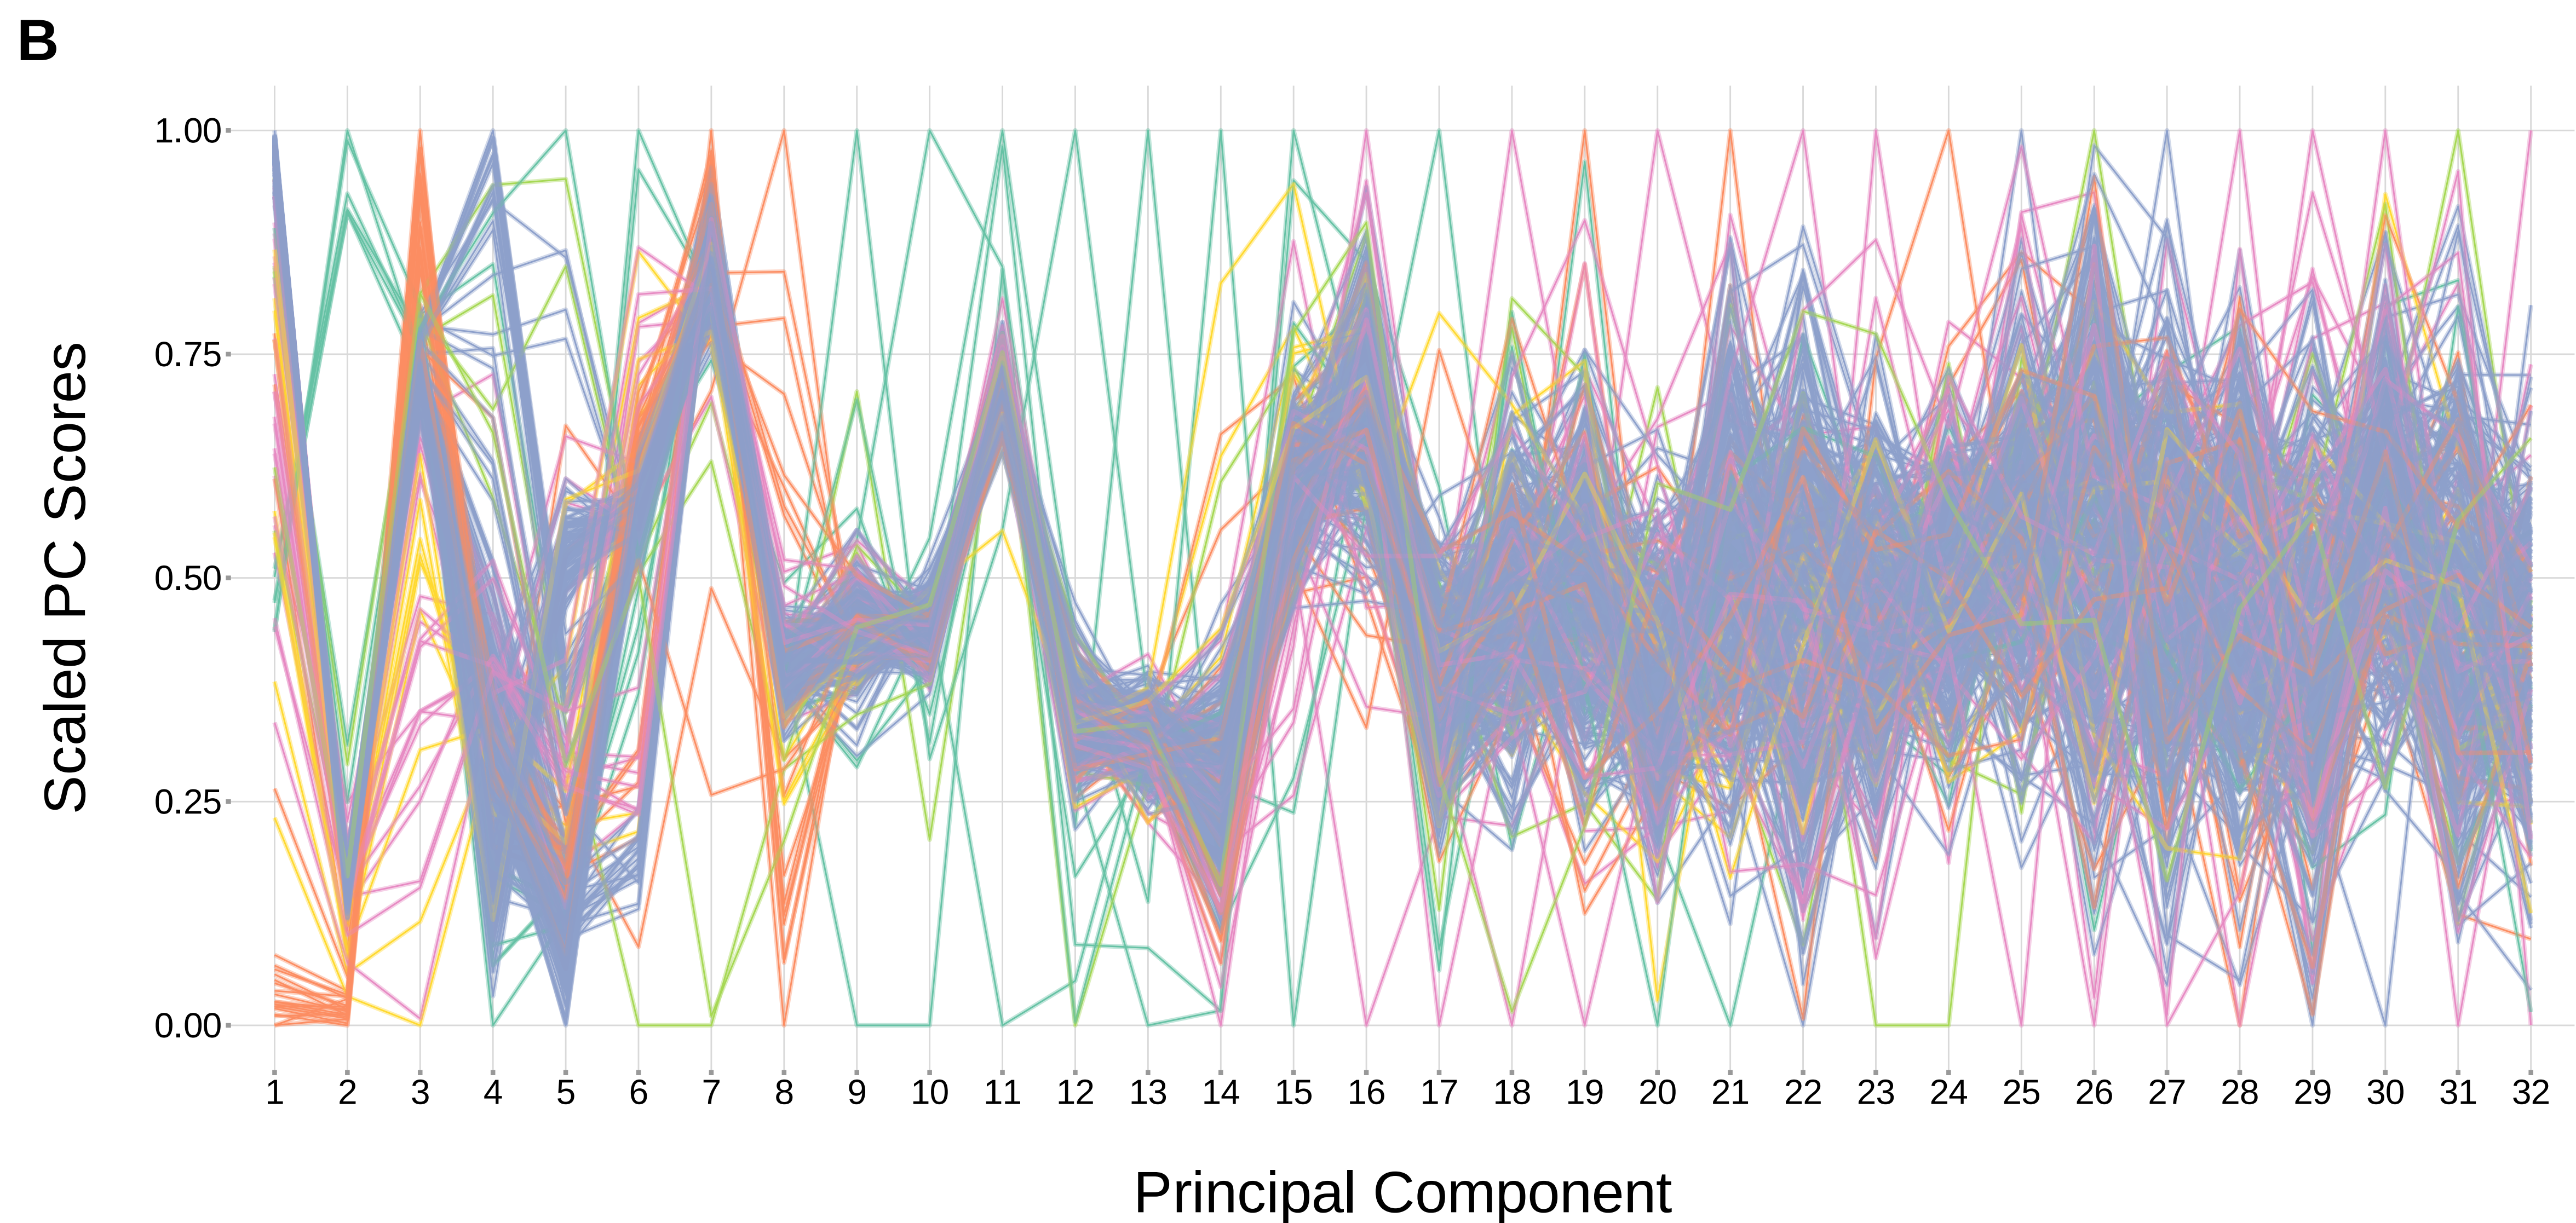

Source: https://biorxiv.org/content/10.1101/2021.09.17.460747v1.full.pdf
